# Supplementary material for: Traces of introgression from cAus into tropical Japonica observed in African upland rice varieties
Source: Research Square preprint supplement (doi:10.21203/rs.3.rs-2160064/v1), 2022-10-17
Supplement: Supplementary file 1 [file 17bbc95147911c1ced20c2b3.xlsx]

## Sheet: infos
Traces of introgression from cAus into tropical Japonica observed in African upland rice varieties
Abdoulaye Beye, Claire Billot, Joëlle Ronfort, Diaga Diouf, Jean-Christophe Glaszmann
List of Supplementary Tables
Supplementary Table S1 : The most significant biological process enrichments considered in this study. Retrieved from https://shinyapps.southgreen.fr/app_direct/goenrich/
Supplementary Table S2 : 291 Tropical japonica accessions from both Africa and Asia
Supplementary Table S3 : Detailed analysis of the cAus introgression on chromosome 6, located between 17.9 and 21.7 Mb
Supplementary Table S4 : Tropical japonica accessions having cAus introgression on chromosome 6 are listed below
Supplementary Table S5 : Results of Patterson's D statistic using ABBA-BABA tests
Supplementary Table S6 : iHS genomic scan results on chromosome 6 of the West African tropical japonica population
Supplementary Table S7 : Tropical japonica accessions groups for TreeMix analysis
Supplementary Table S8 : Results of Patterson's D, fd and fdM statistic using ABBA-BABA tests on chromosome 6
Supplementary Table S9 : 2710 accessions samples from Africa and Asia. This table was adapted from the additional data in the article Wang and al. 2018 : https://www.nature.com/articles/s41586-018-0063-9

## Sheet: Table S1
Supplementary Table S1 : The most significant biological process enrichments considered in this study. Retrieved from https://shinyapps.southgreen.fr/app_direct/goenrich/
ID	Description*	GeneRatio	BgRatio	pvalue	p.adjust	qvalue	Count	GOType	geneID
GO:0009738	abscisic acid-activated signaling pathway	0.2	0.00501412	2.74e-06	1.43e-05	5.84e-06	4	BP	Os06g0526400/Os06g0526466/Os06g0527800/Os06g0528300
GO:0071215	cellular response to abscisic acid stimulus	0.2	0.00509839	2.92e-06	1.43e-05	5.84e-06	4	BP	Os06g0526400/Os06g0526466/Os06g0527800/Os06g0528300
GO:0009737	response to abscisic acid	0.2	0.00863776	2.35e-05	9.81e-05	4e-05	4	BP	Os06g0526400/Os06g0526466/Os06g0527800/Os06g0528300
GO:0031400	negative regulation of protein modification process	0.2	0.00231745	1.22e-07	1.11e-06	4.53e-07	4	BP	Os06g0526400/Os06g0526466/Os06g0527800/Os06g0528300
GO:0010563	negative regulation of phosphorus metabolic process	0.2	0.00240172	1.41e-07	1.11e-06	4.53e-07	4	BP	Os06g0526400/Os06g0526466/Os06g0527800/Os06g0528300
GO:0051346	negative regulation of hydrolase activity	0.2	0.00408714	1.21e-06	7.15e-06	2.91e-06	4	BP	Os06g0526400/Os06g0526466/Os06g0527800/Os06g0528300
GO:0032269	negative regulation of cellular protein metabolic process	0.2	0.00821641	1.93e-05	8.57e-05	3.49e-05	4	BP	Os06g0526400/Os06g0526466/Os06g0527800/Os06g0528300
GO:0051248	negative regulation of protein metabolic process	0.2	0.00821641	1.93e-05	8.57e-05	3.49e-05	4	BP	Os06g0526400/Os06g0526466/Os06g0527800/Os06g0528300
GO:0097306	cellular response to alcohol	0.2	0.00509839	2.92e-06	1.43e-05	5.84e-06	4	BP	Os06g0526400/Os06g0526466/Os06g0527800/Os06g0528300
GO:0071396	cellular response to lipid	0.2	0.00762651	1.44e-05	6.82e-05	2.78e-05	4	BP	Os06g0526400/Os06g0526466/Os06g0527800/Os06g0528300
GO:0035308	negative regulation of protein dephosphorylation	0.2	0.0013062	1.14e-08	1.68e-07	6.83e-08	4	BP	Os06g0526400/Os06g0526466/Os06g0527800/Os06g0528300
GO:0035305	negative regulation of dephosphorylation	0.2	0.00134833	1.3e-08	1.68e-07	6.83e-08	4	BP	Os06g0526400/Os06g0526466/Os06g0527800/Os06g0528300
GO:0006470	protein dephosphorylation	0.3	0.00973328	2.76e-08	3.26e-07	1.33e-07	6	BP	Os06g0526400/Os06g0526466/Os06g0526700/Os06g0526800/Os06g0527800/Os06g0528300
GO:0035304	regulation of protein dephosphorylation	0.2	0.00240172	1.41e-07	1.11e-06	4.53e-07	4	BP	Os06g0526400/Os06g0526466/Os06g0527800/Os06g0528300
GO:0035303	regulation of dephosphorylation	0.2	0.00265453	2.12e-07	1.37e-06	5.57e-07	4	BP	Os06g0526400/Os06g0526466/Os06g0527800/Os06g0528300
GO:0016311	dephosphorylation	0.3	0.0175705	8.93e-07	5.51e-06	2.25e-06	6	BP	Os06g0526400/Os06g0526466/Os06g0526700/Os06g0526800/Os06g0527800/Os06g0528300
GO:0080163	regulation of protein serine/threonine phosphatase activity	0.2	0.000926979	2.66e-09	1.68e-07	6.83e-08	4	BP	Os06g0526400/Os06g0526466/Os06g0527800/Os06g0528300
GO:0032515	negative regulation of phosphoprotein phosphatase activity	0.2	0.0013062	1.14e-08	1.68e-07	6.83e-08	4	BP	Os06g0526400/Os06g0526466/Os06g0527800/Os06g0528300
GO:0010923	negative regulation of phosphatase activity	0.2	0.00134833	1.3e-08	1.68e-07	6.83e-08	4	BP	Os06g0526400/Os06g0526466/Os06g0527800/Os06g0528300
GO:0043666	regulation of phosphoprotein phosphatase activity	0.2	0.00240172	1.41e-07	1.11e-06	4.53e-07	4	BP	Os06g0526400/Os06g0526466/Os06g0527800/Os06g0528300
GO:0045936	negative regulation of phosphate metabolic process	0.2	0.00240172	1.41e-07	1.11e-06	4.53e-07	4	BP	Os06g0526400/Os06g0526466/Os06g0527800/Os06g0528300
GO:0010921	regulation of phosphatase activity	0.2	0.00252812	1.73e-07	1.17e-06	4.78e-07	4	BP	Os06g0526400/Os06g0526466/Os06g0527800/Os06g0528300
*The different colours indicate different clusters with roughly the same function in biological processes.

## Sheet: Table S2
Supplementary Table S2 : 291 Tropical japonica accessions from both Africa and Asia
ID	N_MISS	N_GENO	F_MISS	country	type	zone	sub	name	geo
IRIS_313-9949	3817515	29635224	0.1288	Sri Lanka	T	IOC	GJ-trp	PANNITHI::IRGC 51049-1	As2
IRIS_313-10722	3420148	29635224	0.1154	Sri Lanka	T	IOC	GJ-trp	GODAWEL::IRGC 15750-1	As2
CX132	3590813	29635224	0.1212	India	P	SAC	GJ-trp	AP 423	As2
IRIS_313-11479	3425445	29635224	0.1156	India	inc	SAC	GJ-trp	VANKALI::IRGC 53339-1	As2
IRIS_313-9201	3190934	29635224	0.1077	India	inc	SAC	GJ-trp	ARC 6044::IRGC 12190-1	As2
IRIS_313-11248	3787875	29635224	0.1278	Thailand	T	SEA	GJ-trp	NIAW KHAMIN::IRGC 40222-1	As4
IRIS_313-11611	3459135	29635224	0.1167	Thailand	T	SEA	GJ-trp	YAH YAW::IRGC 61359-1	As4
IRIS_313-10336	3305561	29635224	0.1115	Lao People's Democratic Republic	I	SEA	GJ-trp	B 6144-MR-6-0-0::IRGC 117371-1	As4
CX106	2485825	29635224	0.08388	Viet Nam	P	SEA	GJ-trp	SAL BUI BAO	As4
IRIS_313-9558	3855313	29635224	0.1301	Malaysia	T	SER	GJ-trp	LIMBAYAN::IRGC 71556-1	As4
IRIS_313-12285	3492392	29635224	0.1178	Malaysia	inc	SER	GJ-trp	PADI MIAT (KECIL)::IRGC 97366-1	As4
IRIS_313-8955	3358183	29635224	0.1133	Malaysia	T	SER	GJ-trp	LASAT PUTIH::IRGC 44076-1	As4
IRIS_313-11328	3346675	29635224	0.1129	Malaysia	T	SER	GJ-trp	PADI BURIH::IRGC 44081-1	As4
IRIS_313-12006	3313194	29635224	0.1118	Malaysia	T	SER	GJ-trp	PADI HANGIR::IRGC 79507-1	As4
IRIS_313-8894	3311224	29635224	0.1117	Malaysia	T	SER	GJ-trp	LEKATAN::IRGC 71554-1	As4
IRIS_313-10704	3294936	29635224	0.1112	Malaysia	T	SER	GJ-trp	PADI DARAWAL::IRGC 14373-1	As4
IRIS_313-9375	3231351	29635224	0.109	Malaysia	T	SER	GJ-trp	PULUTAN::IRGC 71596-1	As4
IRIS_313-9050	3202767	29635224	0.1081	Malaysia	T	SER	GJ-trp	ANGKARONG::IRGC 71493-1	As4
IRIS_313-8626	3141053	29635224	0.106	Malaysia	T	SER	GJ-trp	BANJANG::IRGC 44069-1	As4
IRIS_313-10703	3071993	29635224	0.1037	Malaysia	T	SER	GJ-trp	PADI ADONG DUMARAT::IRGC 14356-1	As4
IRIS_313-11329	3030784	29635224	0.1023	Malaysia	T	SER	GJ-trp	PADI JALAI BELA::IRGC 44084-1	As4
IRIS_313-9568	3001235	29635224	0.1013	Malaysia	inc	SER	GJ-trp	PAMPANGON (H)::IRGC 60392-1	As4
IRIS_313-8439	2996873	29635224	0.1011	Malaysia	inc	SER	GJ-trp	KENDINGA 5 (H)::IRGC 60310-1	As4
IRIS_313-11046	2951641	29635224	0.0996	Malaysia	inc	SER	GJ-trp	LALANGIT::IRGC 28715-1	As4
IRIS_313-12108	2909048	29635224	0.09816	Malaysia	inc	SER	GJ-trp	PARAI JALEY MASIK::IRGC 84215-1	As4
IRIS_313-11045	2883128	29635224	0.09729	Malaysia	inc	SER	GJ-trp	ENGKABANG::IRGC 28694-2	As4
IRIS_313-8279	2872323	29635224	0.09692	Malaysia	T	SER	GJ-trp	SAWAH::IRGC 71612-1	As4
IRIS_313-12070	2851403	29635224	0.09622	Malaysia	T	SER	GJ-trp	BABELIONG::IRGC 82688-1	As4
IRIS_313-11044	2801269	29635224	0.09452	Malaysia	inc	SER	GJ-trp	BUKU::IRGC 28683-2	As4
IRIS_313-8381	2704535	29635224	0.09126	Malaysia	T	SER	GJ-trp	PURAK SIRIBA::IRGC 71598-1	As4
IRIS_313-8314	4572762	29635224	0.1543	Indonesia	T	SER	GJ-trp	BEUREUM MEULIT::IRGC 35563-1	As5
IRIS_313-11117	4418691	29635224	0.1491	Indonesia	T	SER	GJ-trp	KAYELI KUNING::IRGC 31974-1	As5
IRIS_313-11003	4405173	29635224	0.1486	Indonesia	T	SER	GJ-trp	PAE MEETO::IRGC 27254-1	As5
IRIS_313-10745	4277056	29635224	0.1443	Indonesia	T	SER	GJ-trp	SLOBOK::IRGC 16571-1	As5
IRIS_313-10803	4110193	29635224	0.1387	Indonesia	T	SER	GJ-trp	PLAMPEYAN::IRGC 18494-1	As5
IRIS_313-10956	4086855	29635224	0.1379	Indonesia	T	SER	GJ-trp	PUTUS TOLO::IRGC 25636-2	As5
IRIS_313-10152	4029818	29635224	0.136	Indonesia	T	SER	GJ-trp	KETAN MENAH::IRGC 48733-1	As5
IRIS_313-12241	3961576	29635224	0.1337	Indonesia	inc	SER	GJ-trp	SEMENDANG::IRGC 93633-1	As5
IRIS_313-10950	3946067	29635224	0.1332	Indonesia	T	SER	GJ-trp	ASE PULU BOLONG::IRGC 25171-1	As5
IRIS_313-10773	3945061	29635224	0.1331	Indonesia	T	SER	GJ-trp	HAWARA DJEDAH::IRGC 17728-1	As5
IRIS_313-10776	3882866	29635224	0.131	Indonesia	T	SER	GJ-trp	KABADOKA::IRGC 17775-2	As5
IRIS_313-10957	3879729	29635224	0.1309	Indonesia	T	SER	GJ-trp	RANGKAI KEPEL::IRGC 25640-1	As5
IRIS_313-10746	3853443	29635224	0.13	Indonesia	T	SER	GJ-trp	TJEMPO KREMBUNG::IRGC 16603-1	As5
IRIS_313-10796	3836872	29635224	0.1295	Indonesia	T	SER	GJ-trp	MOLOG::IRGC 18282-1	As5
B025	3833143	29635224	0.1293	Indonesia	P	SER	GJ-trp	Djanda Mandja	As5
IRIS_313-10788	3739545	29635224	0.1262	Indonesia	T	SER	GJ-trp	LEMUNGSIR::IRGC 18116-3	As5
IRIS_313-11397	3733023	29635224	0.126	Indonesia	T	SER	GJ-trp	TAMBU::IRGC 48932-1	As5
IRIS_313-10784	3731128	29635224	0.1259	Indonesia	T	SER	GJ-trp	KETAN SAPI::IRGC 17954-2	As5
IRIS_313-10808	3721626	29635224	0.1256	Indonesia	T	SER	GJ-trp	RANTE::IRGC 18608-2	As5
IRIS_313-10945	3717345	29635224	0.1254	Indonesia	inc	SER	GJ-trp	BULAK::IRGC 24884-1	As5
IRIS_313-10759	3670022	29635224	0.1238	Indonesia	T	SER	GJ-trp	ANDEL::IRGC 17153-2	As5
IRIS_313-10785	3667941	29635224	0.1238	Indonesia	T	SER	GJ-trp	KETAN SLAWI::IRGC 17963-1	As5
IRIS_313-11498	3661789	29635224	0.1236	Indonesia	T	SER	GJ-trp	PADI HEDENG (REKET HEDENG)::IRGC 54266-1	As5
IRIS_313-10781	3649328	29635224	0.1231	Indonesia	T	SER	GJ-trp	KETAN MLANTING::IRGC 17916-1	As5
IRIS_313-10936	3642724	29635224	0.1229	Indonesia	inc	SER	GJ-trp	KETAN GUNDIL::IRGC 24568-1	As5
IRIS_313-9301	3633141	29635224	0.1226	Indonesia	T	SER	GJ-trp	KETAN DONGGO::IRGC 54201-1	As5
IRIS_313-9129	3620616	29635224	0.1222	Indonesia	T	SER	GJ-trp	LAYANDABU::IRGC 25214-1	As5
IRIS_313-10689	3596298	29635224	0.1214	Indonesia	T	SER	GJ-trp	SIKEP BATU::IRGC 13514-2	As5
IRIS_313-10952	3583185	29635224	0.1209	Indonesia	T	SER	GJ-trp	KILANG MEDU::IRGC 25442-1	As5
IRIS_313-9239	3581062	29635224	0.1208	Indonesia	T	SER	GJ-trp	RIMBUN::IRGC 43741-1	As5
IRIS_313-10741	3572146	29635224	0.1205	Indonesia	T	SER	GJ-trp	KETAN PELERN::IRGC 16468-1	As5
IRIS_313-10780	3554844	29635224	0.12	Indonesia	T	SER	GJ-trp	KETAN LALER::IRGC 17897-1	As5
IRIS_313-11496	3556353	29635224	0.12	Indonesia	T	SER	GJ-trp	BALU PRIA::IRGC 54158-1	As5
IRIS_313-10809	3547844	29635224	0.1197	Indonesia	T	SER	GJ-trp	SAMPANG KUNING::IRGC 18678-2	As5
IRIS_313-10958	3538889	29635224	0.1194	Indonesia	T	SER	GJ-trp	RENIK BELITI::IRGC 25648-1	As5
IRIS_313-11313	3533110	29635224	0.1192	Indonesia	T	SER	GJ-trp	PADI RENDAH::IRGC 43515-1	As5
IRIS_313-10800	3517306	29635224	0.1187	Indonesia	T	SER	GJ-trp	PALOTAN MELATI::IRGC 18426-2	As5
IRIS_313-10953	3515955	29635224	0.1186	Indonesia	T	SER	GJ-trp	PADI ABUNG KUNING::IRGC 25469-1	As5
IRIS_313-11004	3501817	29635224	0.1182	Indonesia	T	SER	GJ-trp	PAE SANGGULA::IRGC 27297-1	As5
IRIS_313-10783	3481756	29635224	0.1175	Indonesia	T	SER	GJ-trp	KETAN OSOG::IRGC 17929-1	As5
IRIS_313-10790	3482076	29635224	0.1175	Indonesia	T	SER	GJ-trp	LOLAWAJI::IRGC 18131-1	As5
IRIS_313-10946	3480959	29635224	0.1175	Indonesia	inc	SER	GJ-trp	MANGGE::IRGC 25019-1	As5
IRIS_313-10799	3470946	29635224	0.1171	Indonesia	T	SER	GJ-trp	PAE ONGGA::IRGC 18418-1	As5
IRIS_313-10789	3454681	29635224	0.1166	Indonesia	T	SER	GJ-trp	LENGGANG GENUK BULU::IRGC 18119-1	As5
IRIS_313-10761	3423736	29635224	0.1155	Indonesia	T	SER	GJ-trp	BALIK SEMAH::IRGC 17201-2	As5
IRIS_313-11499	3416521	29635224	0.1153	Indonesia	T	SER	GJ-trp	PADI UDANG::IRGC 54295-1	As5
IRIS_313-10815	3397155	29635224	0.1146	Indonesia	T	SER	GJ-trp	SIDJANGGUK::IRGC 18826-2	As5
IRIS_313-10816	3389140	29635224	0.1144	Indonesia	T	SER	GJ-trp	SIDJERO GUNDIL::IRGC 18829-2	As5
IRIS_313-10960	3389541	29635224	0.1144	Indonesia	T	SER	GJ-trp	SUNGKAI::IRGC 25812-1	As5
IRIS_313-10770	3385857	29635224	0.1143	Indonesia	T	SER	GJ-trp	GANDAMANA::IRGC 17593-2	As5
IRIS_313-10795	3388451	29635224	0.1143	Indonesia	T	SER	GJ-trp	MLATI::IRGC 18278-1	As5
IRIS_313-10841	3382473	29635224	0.1141	Indonesia	T	SER	GJ-trp	KETAN NANGKA::IRGC 19961-2	As5
IRIS_313-11903	3380168	29635224	0.1141	Indonesia	inc	SER	GJ-trp	KOMPIT::IRGC 73716-1	As5
IRIS_313-10740	3376078	29635224	0.1139	Indonesia	T	SER	GJ-trp	KETAN PAPAH AREN::IRGC 16467-1	As5
IRIS_313-10767	3371110	29635224	0.1138	Indonesia	T	SER	GJ-trp	DJANGGOT::IRGC 17491-2	As5
IRIS_313-11005	3369255	29635224	0.1137	Indonesia	T	SER	GJ-trp	PULU LOTONG::IRGC 27380-2	As5
IRIS_313-10758	3359808	29635224	0.1134	Indonesia	T	SER	GJ-trp	AEN METAN::IRGC 17142-1	As5
IRIS_313-10817	3351576	29635224	0.1131	Indonesia	T	SER	GJ-trp	SLAMET::IRGC 18900-3	As5
IRIS_313-11396	3346868	29635224	0.1129	Indonesia	I	SER	GJ-trp	MAS::IRGC 48758-1	As5
IRIS_313-10765	3342592	29635224	0.1128	Indonesia	T	SER	GJ-trp	CERE KAWAT::IRGC 17401-2	As5
IRIS_313-11314	3334124	29635224	0.1125	Indonesia	T	SER	GJ-trp	PELAU::IRGC 43538-2	As5
IRIS_313-11007	3328545	29635224	0.1123	Indonesia	T	SER	GJ-trp	PULUT BONGO::IRGC 27397-2	As5
IRIS_313-10802	3317245	29635224	0.1119	Indonesia	T	SER	GJ-trp	PEUTEUJ::IRGC 18484-1	As5
IRIS_313-10949	3306252	29635224	0.1116	Indonesia	inc	SER	GJ-trp	TEKALAK::IRGC 25154-1	As5
IRIS_313-10959	3290507	29635224	0.111	Indonesia	T	SER	GJ-trp	SITABO TABO::IRGC 25798-1	As5
IRIS_313-8664	3276390	29635224	0.1106	Indonesia	T	SER	GJ-trp	SITORU::IRGC 66669-1	As5
IRIS_313-10747	3276117	29635224	0.1105	Indonesia	T	SER	GJ-trp	TJOKRON::IRGC 16653-2	As5
IRIS_313-11495	3272620	29635224	0.1104	Indonesia	T	SER	GJ-trp	ANENOE::IRGC 54140-1	As5
IRIS_313-10805	3265075	29635224	0.1102	Indonesia	T	SER	GJ-trp	PULO::IRGC 18519-1	As5
IRIS_313-11907	3258117	29635224	0.1099	Indonesia	inc	SER	GJ-trp	TINAROH::IRGC 73874-1	As5
IRIS_313-10771	3247605	29635224	0.1096	Indonesia	T	SER	GJ-trp	GOGO RAJAPAN::IRGC 17666-2	As5
IRIS_313-11971	3235718	29635224	0.1092	Indonesia	T	SER	GJ-trp	PARE LAMBAN BINGKA::IRGC 77601-1	As5
IRIS_313-8998	3233077	29635224	0.1091	Indonesia	T	SER	GJ-trp	SIGAE::IRGC 66645-1	As5
IRIS_313-9405	3227501	29635224	0.1089	Indonesia	T	SER	GJ-trp	INGSA BELANAK::IRGC 43402-1	As5
IRIS_313-11970	3220977	29635224	0.1087	Indonesia	T	SER	GJ-trp	BUNTU DOMBA 1::IRGC 77554-1	As5
IRIS_313-10801	3210837	29635224	0.1083	Indonesia	T	SER	GJ-trp	PARE BUWUN::IRGC 18456-2	As5
IRIS_313-11906	3204386	29635224	0.1081	Indonesia	inc	SER	GJ-trp	SULUS BALOK::IRGC 73862-1	As5
IRIS_313-10794	3193525	29635224	0.1078	Indonesia	T	SER	GJ-trp	MENDUNGAN::IRGC 18245-1	As5
IRIS_313-10743	3175604	29635224	0.1072	Indonesia	T	SER	GJ-trp	SERAJU::IRGC 16565-1	As5
IRIS_313-11183	3155358	29635224	0.1065	Indonesia	T	SER	GJ-trp	KETAN LEMBAYUNGAN::IRGC 35745-2	As5
IRIS_313-10744	3150824	29635224	0.1063	Indonesia	T	SER	GJ-trp	SIPON::IRGC 16570-1	As5
IRIS_313-10693	3127201	29635224	0.1055	Indonesia	T	SER	GJ-trp	SEREH::IRGC 13732-2	As5
IRIS_313-12069	3117377	29635224	0.1052	Indonesia	T	SER	GJ-trp	PULUT MAS::IRGC 82676-1	As5
IRIS_313-11001	3110887	29635224	0.105	Indonesia	T	SER	GJ-trp	PAEDAI SOBUDI::IRGC 27222-1	As5
IRIS_313-11009	3099366	29635224	0.1046	Indonesia	T	SER	GJ-trp	PULUT HALAPA::IRGC 27403-1	As5
IRIS_313-10766	3074282	29635224	0.1037	Indonesia	T	SER	GJ-trp	DJALAWARA::IRGC 17471-1	As5
IRIS_313-9691	3047091	29635224	0.1028	Indonesia	T	SER	GJ-trp	SIFARASI::IRGC 66644-1	As5
IRIS_313-10999	3004072	29635224	0.1014	Indonesia	T	SER	GJ-trp	LANDEO::IRGC 27164-1	As5
IRIS_313-10793	2975811	29635224	0.1004	Indonesia	T	SER	GJ-trp	MELIK::IRGC 18238-2	As5
IRIS_313-11311	2959483	29635224	0.09986	Indonesia	T	SER	GJ-trp	CICIH KAPUK::IRGC 43377-3	As5
IRIS_313-8865	2915758	29635224	0.09839	Indonesia	T	SER	GJ-trp	PADI SEPAH::IRGC 48803-1	As5
IRIS_313-10798	2909386	29635224	0.09817	Indonesia	T	SER	GJ-trp	NOGO BELE 2::IRGC 18328-2	As5
IRIS_313-12068	2897923	29635224	0.09779	Indonesia	T	SER	GJ-trp	PULUT KETAN::IRGC 82674-2	As5
IRIS_313-7885	2884947	29635224	0.09735	Indonesia	T	SER	GJ-trp	GOGO::IRGC 43390-C1	As5
IRIS_313-12045	2856885	29635224	0.0964	Indonesia	T	SER	GJ-trp	BUYAN::IRGC 81440-1	As5
IRIS_313-8436	2836204	29635224	0.0957	Indonesia	T	SER	GJ-trp	PIKTO MAMAS::IRGC 18487-1	As5
IRIS_313-11008	2805860	29635224	0.09468	Indonesia	T	SER	GJ-trp	PULUT CENRANA::IRGC 27400-2	As5
IRIS_313-9470	2694802	29635224	0.09093	Indonesia	T	SER	GJ-trp	SAHULO FACHE SOYO::IRGC 66630-1	As5
IRIS_313-7883	2611919	29635224	0.08814	Indonesia	T	SER	GJ-trp	GANIGI::IRGC 48698-C1	As5
IRIS_313-10581	6320318	29635224	0.2133	Philippines	T	SER	GJ-trp	P PEY SIQAT::IRGC 8129-1	As5
IRIS_313-9423	4526294	29635224	0.1527	Philippines	T	SER	GJ-trp	AGUYOD::IRGC 67423-1	As5
IRIS_313-10920	4275475	29635224	0.1443	Philippines	T	SER	GJ-trp	PINIDWA QAN QIPUGO QELEK::IRGC 23360-1	As5
IRIS_313-10919	4201009	29635224	0.1418	Philippines	T	SER	GJ-trp	PINIDWA QAN QIPUGO PINGKITAN::IRGC 23359-1	As5
IRIS_313-9928	4163595	29635224	0.1405	Philippines	T	SER	GJ-trp	DEO KITAN::IRGC 47197-1	As5
IRIS_313-11424	4077409	29635224	0.1376	Philippines	T	SER	GJ-trp	SINAPLED::IRGC 50402-1	As5
IRIS_313-8594	4067082	29635224	0.1372	Philippines	T	SER	GJ-trp	MINATANDA::IRGC 74613-1	As5
IRIS_313-10991	3976320	29635224	0.1342	Philippines	T	SER	GJ-trp	GINATOS::IRGC 26876-1	As5
IRIS_313-11380	3916375	29635224	0.1322	Philippines	T	SER	GJ-trp	CA ONG (WHITE)::IRGC 47174-1	As5
IRIS_313-10580	3833491	29635224	0.1294	Philippines	T	SER	GJ-trp	PARAY KINARABAW::IRGC 8083-1	As5
IRIS_313-11532	3787865	29635224	0.1278	Philippines	T	SER	GJ-trp	MARIA GAKIT::IRGC 57070-1	As5
IRIS_313-10829	3664862	29635224	0.1237	Philippines	T	SER	GJ-trp	INAMBOG::IRGC 19415-1	As5
IRIS_313-10830	3587705	29635224	0.1211	Philippines	T	SER	GJ-trp	INAPORAONAN::IRGC 19418-1	As5
IRIS_313-10931	3526013	29635224	0.119	Philippines	T	SER	GJ-trp	PAKWALAN::IRGC 24156-1	As5
IRIS_313-9389	3521383	29635224	0.1188	Philippines	T	SER	GJ-trp	KINANDANG BUSIKSIK::IRGC 74607-1	As5
IRIS_313-11340	3521150	29635224	0.1188	Philippines	T	SER	GJ-trp	MINANOK::IRGC 44637-2	As5
IRIS_313-9616	3495939	29635224	0.118	Philippines	T	SER	GJ-trp	INITLOG DALAG::IRGC 67436-1	As5
IRIS_313-10993	3487355	29635224	0.1177	Philippines	T	SER	GJ-trp	LANNAB::IRGC 26936-2	As5
IRIS_313-10489	3473511	29635224	0.1172	Philippines	T	SER	GJ-trp	MOROPOTOL::IRGC 3909-1	As5
IRIS_313-11379	3409559	29635224	0.1151	Philippines	T	SER	GJ-trp	CADIDIT (GLUT)::IRGC 47161-1	As5
IRIS_313-11465	3393974	29635224	0.1145	Philippines	T	SER	GJ-trp	DINORADO::IRGC 52893-1	As5
IRIS_313-10831	3389951	29635224	0.1144	Philippines	T	SER	GJ-trp	MALANDI 2::IRGC 19454-2	As5
IRIS_313-11337	3351331	29635224	0.1131	Philippines	T	SER	GJ-trp	LAWA AN::IRGC 44544-2	As5
IRIS_313-10832	3312950	29635224	0.1118	Philippines	T	SER	GJ-trp	MALASAY::IRGC 19456-1	As5
IRIS_313-11441	3308008	29635224	0.1116	Philippines	T	SER	GJ-trp	NALA::IRGC 51247-1	As5
IRIS_313-10992	3300947	29635224	0.1114	Philippines	T	SER	GJ-trp	PILIT TAPUL::IRGC 26887-1	As5
IRIS_313-12244	3289252	29635224	0.111	Philippines	inc	SER	GJ-trp	PINAHULA::IRGC 93937-1	As5
IRIS_313-9897	3279622	29635224	0.1107	Philippines	T	SER	GJ-trp	BIKYAT::IRGC 26276-1	As5
IRIS_313-12031	3266501	29635224	0.1102	Philippines	inc	SER	GJ-trp	P T Q QINDONAAL::IRGC 80410-1	As5
IRIS_313-11511	3242092	29635224	0.1094	Philippines	T	SER	GJ-trp	WAGASAN (RED)::IRGC 55404-1	As5
IRIS_313-11537	3239570	29635224	0.1093	Philippines	I	SER	GJ-trp	J 6 IR 438 (WC 694)::IRGC 57599-1	As5
IRIS_313-10485	3232434	29635224	0.1091	Philippines	P	SER	GJ-trp	CATIBOS::IRGC 3762-1	As5
IRIS_313-10828	3231481	29635224	0.109	Philippines	T	SER	GJ-trp	IKOGAN::IRGC 19412-1	As5
IRIS_313-11851	3221212	29635224	0.1087	Philippines	T	SER	GJ-trp	DUNA AL::IRGC 71842-1	As5
IRIS_313-10649	3179126	29635224	0.1073	Philippines	I	SER	GJ-trp	RACION 1::IRGC 11340-1	As5
IRIS_313-9929	3172816	29635224	0.1071	Philippines	T	SER	GJ-trp	GOBYERNO::IRGC 47216-1	As5
IRIS_313-11464	3120049	29635224	0.1053	Philippines	T	SER	GJ-trp	CARAWI::IRGC 52887-1	As5
IRIS_313-10645	3087620	29635224	0.1042	Philippines	T	SER	GJ-trp	LENKIBE-N::IRGC 11216-1	As5
IRIS_313-10994	3085672	29635224	0.1041	Philippines	T	SER	GJ-trp	PANGETAN::IRGC 26942-3	As5
IRIS_313-11473	3086143	29635224	0.1041	Philippines	T	SER	GJ-trp	KINTOMAN (TOD DOY)::IRGC 53146-1	As5
IRIS_313-12073	3081468	29635224	0.104	Philippines	T	SER	GJ-trp	KASIGNAYAN::IRGC 82788-1	As5
IRIS_313-10827	3077536	29635224	0.1038	Philippines	T	SER	GJ-trp	BINARITOS::IRGC 19391-1	As5
IRIS_313-10644	3067585	29635224	0.1035	Philippines	T	SER	GJ-trp	BUSIYETAN::IRGC 11205-1	As5
IRIS_313-11913	3031320	29635224	0.1023	Philippines	T	SER	GJ-trp	BUAGKOG::IRGC 74318-1	As5
IRIS_313-8356	3000275	29635224	0.1012	Philippines	T	SER	GJ-trp	BLICCA::IRGC 47151-1	As5
IRIS_313-10578	2994207	29635224	0.101	Philippines	T	SER	GJ-trp	PARAY QIKUG KABAYUH::IRGC 8059-1	As5
IRIS_313-12271	2955165	29635224	0.09972	Philippines	inc	SER	GJ-trp	BATIBATIKAN::IRGC 96098-1	As5
IRIS_313-8431	2947068	29635224	0.09944	Philippines	T	SER	GJ-trp	BOCAO::IRGC 50384-1	As5
IRIS_313-12272	2934997	29635224	0.09904	Philippines	inc	SER	GJ-trp	MALAGKIT (ITIM)::IRGC 96124-1	As5
IRIS_313-11928	2917188	29635224	0.09844	Philippines	T	SER	GJ-trp	DAYRON MARANGRAS::IRGC 75209-1	As5
IRIS_313-11995	2906467	29635224	0.09807	Philippines	T	SER	GJ-trp	PINUTYUKAN::IRGC 78995-1	As5
IRIS_313-12051	2845730	29635224	0.09603	Philippines	T	SER	GJ-trp	TINOLDO MARANGRAS::IRGC 81758-1	As5
IRIS_313-11994	2747663	29635224	0.09272	Philippines	T	SER	GJ-trp	KALINDIG::IRGC 78968-1	As5
IRIS_313-7876	2724051	29635224	0.09192	Philippines	T	SER	GJ-trp	DINORADO::IRTP 12568-C1	As5
IRIS_313-12144	2708682	29635224	0.0914	Philippines	inc	SER	GJ-trp	GINAYANGGANG::IRGC 87131-1	As5
IRIS_313-8572	2670870	29635224	0.09012	Philippines	T	SER	GJ-trp	ONOY::IRGC 55418-1	As5
IRIS_313-10918	2651820	29635224	0.08948	Philippines	T	SER	GJ-trp	T Q QI QINYUHAYUHA::IRGC 23342-3	As5
IRIS_313-10577	2562768	29635224	0.08648	Philippines	T	SER	GJ-trp	IFUGAO RICE::IRGC 8052-1	As5
IRIS_313-10582	2553107	29635224	0.08615	Philippines	T	SER	GJ-trp	QINOGNAS::IRGC 8135-1	As5
IRIS_313-11929	2500195	29635224	0.08437	Philippines	T	SER	GJ-trp	GILINGAN MARANGRAS::IRGC 75213-1	As5
IRIS_313-11736	2307646	29635224	0.07787	Philippines	T	SER	GJ-trp	MALAGKIT (PINELIPE)::IRGC 67444-1	As5
IRIS_313-11673	2296599	29635224	0.0775	Philippines	T	SER	GJ-trp	BURI BURING::IRGC 64174-1	As5
IRIS_313-8232	4104813	29635224	0.1385	Philippines	I	SER-IRRI	GJ-trp	IR 62266-42-6-2::IRGC 117397-1	As5
CX266	3940504	29635224	0.133	Philippines	T	SER-IRRI	GJ-trp	DINORADO	As5
IRIS_313-7907	3898795	29635224	0.1316	Philippines	I	SER-IRRI	GJ-trp	IR 68704-145-1-1-B::C1	As5
CX248	3755643	29635224	0.1267	Philippines	T	SER-IRRI	GJ-trp	Kinandang Patong	As5
CX243	3400249	29635224	0.1147	Philippines	I	SER-IRRI	GJ-trp	IR 47686-6-2-1-1	As5
CX151	3022862	29635224	0.102	Philippines	T	SER-IRRI	GJ-trp	AZUCENA	As5
IRIS_313-8003	2986103	29635224	0.1008	Philippines	I	SER-IRRI	GJ-trp	IR 47686-09-01-B-1::C1	As5
IRIS_313-7909	2925316	29635224	0.09871	Philippines	I	SER-IRRI	GJ-trp	IR 71525-19-1-1::C1	As5
IRIS_313-8010	2766263	29635224	0.09334	Philippines	I	SER-IRRI	GJ-trp	IR 71524-44-1-1::C1	As5
IRIS_313-7902	2632465	29635224	0.08883	Philippines	I	SER-IRRI	GJ-trp	IR 63380-16::C1	As5
B196	3519404	29635224	0.1188	Taiwan	inc	EAR	GJ-trp	Taidongludao	As6
IRIS_313-10507	3519050	29635224	0.1187	Taiwan	P	EAR	GJ-trp	HSIANG TSENF TAO::IRGC 5008-1	As6
CX367	4069942	29635224	0.1373	China	P	EAS	GJ-trp	Haogelao	As6
CX359	3660950	29635224	0.1235	China	P	EAS	GJ-trp	Yunlu 103	As6
CX355	3547332	29635224	0.1197	China	P	EAS	GJ-trp	Yunlu 102	As6
IRIS_313-10196	3459554	29635224	0.1167	China	inc	EAS	GJ-trp	GUO DI HEI::IRGC 72697-1	As6
CX352	3297673	29635224	0.1113	China	P	EAS	GJ-trp	BD 007	As6
CX285	2667603	29635224	0.09001	China	P	EAS	GJ-trp	Nonglinnuo	As6
IRIS_313-10076	3818046	29635224	0.1288	Japan	T	EAR	GJ-trp	SHINA MOCHI::IRGC 74523-1	As7
IRIS_313-9789	3372281	29635224	0.1138	Japan	inc	EAR	GJ-trp	RIKUTO TAUKI MOCHI 27::IRGC 5726-1	As7
IRIS_313-10075	3342446	29635224	0.1128	Japan	T	EAR	GJ-trp	SANGOKU::IRGC 74518-1	As7
IRIS_313-8400	3323375	29635224	0.1121	Japan	inc	EAR	GJ-trp	RIKUTO NORIN MOCHI 20::IRGC 410-1	As7
IRIS_313-10071	3321332	29635224	0.1121	Japan	T	EAR	GJ-trp	CHIYODA WASE::IRGC 74467-1	As7
IRIS_313-10065	3280800	29635224	0.1107	Korea, Republic of	T	EAR	GJ-trp	JAERAERYUKDO::IRGC 73053-1	As7
IRIS_313-9995	3237872	29635224	0.1093	Korea, Republic of	I	EAR	GJ-trp	NONGLIMNA 1::IRGC 58347-1	As7
IRIS_313-10082	3198917	29635224	0.1079	Japan	T	EAR	GJ-trp	KYUUSHUU::IRGC 74558-1	As7
IRIS_313-10079	3167628	29635224	0.1069	Japan	T	EAR	GJ-trp	DANGO MOCHI::IRGC 74551-1	As7
IRIS_313-10067	3056541	29635224	0.1031	Korea, Republic of	T	EAR	GJ-trp	JEONBUKGUNGWEONNA::IRGC 73055-1	As7
IRIS_313-10074	3045926	29635224	0.1028	Japan	T	EAR	GJ-trp	RIKU AIKOKU::IRGC 74514-1	As7
IRIS_313-10073	3026626	29635224	0.1021	Japan	T	EAR	GJ-trp	OWARI MOCHI::IRGC 74513-1	As7
IRIS_313-10094	3008127	29635224	0.1015	Korea, Republic of	T	EAR	GJ-trp	GAWICHAL::IRGC 77653-1	As7
IRIS_313-10080	2839082	29635224	0.0958	Japan	T	EAR	GJ-trp	HIRAKAWA OKUTE::IRGC 74554-1	As7
IRIS_313-10078	2702684	29635224	0.0912	Japan	T	EAR	GJ-trp	YOSHINO MOCHI::IRGC 74550-1	As7
IRIS_313-9800	3175503	29635224	0.1072	Japan	P	EAR	GJ-trp	KAHEI::IRGC 7691-1	#N/A
CX129	3774881	29635224	0.1274	Indonesia	T	SER	GJ-trp	MOLOK	#N/A
IRIS_313-10051	3958940	29635224	0.1336	Madagascar	T	IOC	GJ-trp	TSIVIMBININA::IRGC 69890-1	mada
IRIS_313-10041	3786637	29635224	0.1278	Madagascar	T	IOC	GJ-trp	BOTOHAVANA MENA::IRGC 69349-1	mada
IRIS_313-9745	3617203	29635224	0.1221	Madagascar	T	IOC	GJ-trp	VARY MALADY::IRGC 69911-1	mada
IRIS_313-7993	3226497	29635224	0.1089	Madagascar	inc	IOC	GJ-trp	VARY LAVA DE BETAFO::GERVEX 8381-C1	mada
IRIS_313-10099	3157045	29635224	0.1065	Madagascar	T	IOC	GJ-trp	MANONGAZATO::IRGC 77876-1	mada
IRIS_313-11792	3069036	29635224	0.1036	Madagascar	T	IOC	GJ-trp	VONBOANGY::IRGC 69947-1	mada
IRIS_313-12279	2993693	29635224	0.101	Madagascar	inc	IOC	GJ-trp	RAMADITRA::IRGC 97124-1	mada
IRIS_313-7959	2892056	29635224	0.09759	Madagascar	inc	IOC	GJ-trp	MITSANGANAHIJERY::GERVEX 8316-C1	mada
IRIS_313-7992	2867773	29635224	0.09677	Madagascar	T	IOC	GJ-trp	VARY LAVA 90::GERVEX 8254-C1	mada
IRIS_313-11790	2820842	29635224	0.09519	Madagascar	T	IOC	GJ-trp	VARIRANGAHY::IRGC 69897-1	mada
IRIS_313-9742	2800380	29635224	0.09449	Madagascar	T	IOC	GJ-trp	LOHAMBITRO::IRGC 69857-1	mada
IRIS_313-12281	2789294	29635224	0.09412	Madagascar	inc	IOC	GJ-trp	SALAZANA::IRGC 97219-1	mada
IRIS_313-7994	2697669	29635224	0.09103	Madagascar	T	IOC	GJ-trp	VARY MADINIKA 3566::GERVEX 8448-C1	mada
IRIS_313-11756	2490077	29635224	0.08402	Madagascar	inc	IOC	GJ-trp	BENGALI VAKAHANA 1448::IRGC 68370-1	mada
IRIS_313-7850	2297039	29635224	0.07751	Madagascar	inc	IOC	GJ-trp	BODA 148-3::GERVEX 8258-C1	mada
CX372	5844828	29635224	0.1972	Cote d'Ivoire	I	WAF	GJ-trp	NERICA 2	Af0
CX373	5711809	29635224	0.1927	Cote d'Ivoire	I	WAF	GJ-trp	NERICA 8	Af0
CX371	5374678	29635224	0.1814	Cote d'Ivoire	I	WAF	GJ-trp	NERICA 1	Af0
CX374	4328270	29635224	0.1461	Cote d'Ivoire	I	WAF	GJ-trp	NERICA 9	Af0
IRIS_313-11159	5160758	29635224	0.1741	Cote d'Ivoire	I	WAF	GJ-trp	HYB 5-2-1-1-4::IRGC 34283-2	Af1
IRIS_313-15905	4195991	29635224	0.1416	Cote d'Ivoire	I	WAF	GJ-trp	WAB 56-125::IRTP 19771-G1	Af1
B188	3755435	29635224	0.1267	Cote d'Ivoire	I	WAF	GJ-trp	IRAT 36	Af1
IRIS_313-12021	3442315	29635224	0.1162	Nigeria	I	WAF	GJ-trp	ITA 131::IRGC 80025-1	Af1
IRIS_313-11915	3281013	29635224	0.1107	Ghana	I	WAF	GJ-trp	IB 95::IRGC 74677-1	Af1
IRIS_313-7912	2888846	29635224	0.09748	Cote d'Ivoire	I	WAF	GJ-trp	IRAT 104::C1	Af1
IRIS_313-7914	2830520	29635224	0.09551	Cote d'Ivoire	I	WAF	GJ-trp	IRAT 112::C1	Af1
CX220	2751691	29635224	0.09285	Cote d'Ivoire	I	WAF	GJ-trp	IRAT 109	Af1
IRIS_313-11161	4541193	29635224	0.1532	Liberia	inc	WAF	GJ-trp	SADU::IRGC 34514-2	Af1
IRIS_313-10711	4461274	29635224	0.1505	Liberia	inc	WAF	GJ-trp	7 AC::IRGC 14860-2	Af1
IRIS_313-11107	4436927	29635224	0.1497	Liberia	inc	WAF	GJ-trp	ZANTON::IRGC 31248-1	Af1
IRIS_313-11106	4334739	29635224	0.1463	Liberia	inc	WAF	GJ-trp	D 4-193::IRGC 31083-2	Af1
IRIS_313-11100	3994600	29635224	0.1348	Liberia	inc	WAF	GJ-trp	MAMON::IRGC 30792-1	Af1
IRIS_313-8523	3390288	29635224	0.1144	Nigeria	inc	WAF	GJ-trp	OS 4::IRGC 11335-1	Af1
IRIS_313-10730	3326907	29635224	0.1123	Cote d'Ivoire	inc	WAF	GJ-trp	NANIBRE::IRGC 16102-2	Af1
IRIS_313-9297	3132275	29635224	0.1057	Liberia	inc	WAF	GJ-trp	KORR::IRGC 30751-1	Af1
IRIS_313-7838	3073598	29635224	0.1037	Senegal	inc	WAF	GJ-trp	62667::C1	Af1
B190	2952630	29635224	0.09963	Nigeria	inc	WAF	GJ-trp	ITA 221	Af1
IRIS_313-11102	2472241	29635224	0.08342	Liberia	inc	WAF	GJ-trp	D 1-39::IRGC 30868-1	Af1
IRIS_313-10541	2806488	29635224	0.0947	Guinea-Bissau	P	WAF	GJ-trp	IACA ESCURO::IRGC 6636-1	Af1
IRIS_313-8769	4033436	29635224	0.1361	Guinea	T	WAF	GJ-trp	KOSAGI::IRGC 57692-1	Af1
IRIS_313-11660	3683412	29635224	0.1243	Liberia	T	WAF	GJ-trp	WULE DASIMA::IRGC 63450-1	Af1
IRIS_313-11527	3672304	29635224	0.1239	Cote d'Ivoire	T	WAF	GJ-trp	GOLO::IRGC 56856-1	Af1
IRIS_313-11946	2804071	29635224	0.09462	Burkina Faso	T	WAF	GJ-trp	BWANGA MOUI::IRGC 76262-1	Af1
IRIS_313-8687	2802798	29635224	0.09458	Guinea-Bissau	T	WAF	GJ-trp	KEREN FENHO::IRGC 56735-1	Af1
IRIS_313-8768	2802972	29635224	0.09458	Cote d'Ivoire	T	WAF	GJ-trp	MOROFIN::IRGC 56698-1	Af1
IRIS_313-11435	2756972	29635224	0.09303	Cote d'Ivoire	T	WAF	GJ-trp	MONMINEUPLEU::IRGC 50873-1	Af1
IRIS_313-11436	2664700	29635224	0.08992	Cote d'Ivoire	T	WAF	GJ-trp	SAKAZELE (538)::IRGC 50880-1	Af1
IRIS_313-11659	2649064	29635224	0.08939	Sierra Leone	T	WAF	GJ-trp	TOBOHUN::IRGC 63433-1	Af1
IRIS_313-11739	2507350	29635224	0.08461	Ghana	T	WAF	GJ-trp	NAKPUI::IRGC 67594-1	Af1
B189	3606713	29635224	0.1217	Cote d'Ivoire	I	WAF	GJ-trp	IRAT 669	intr
IRIS_313-11121	5620513	29635224	0.1897	Liberia	inc	WAF	GJ-trp	GBRA::IRGC 32474-2	intr
IRIS_313-11105	4131959	29635224	0.1394	Liberia	inc	WAF	GJ-trp	D 3-130::IRGC 30986-2	intr
IRIS_313-11109	3655237	29635224	0.1233	Liberia	inc	WAF	GJ-trp	B 106::IRGC 31352-1	intr
IRIS_313-10712	3489504	29635224	0.1177	Cote d'Ivoire	inc	WAF	GJ-trp	KOTO OURA S 5::IRGC 15155-1	intr
IRIS_313-11376	3277869	29635224	0.1106	Cote d'Ivoire	inc	WAF	GJ-trp	TOS 7536::IRGC 46985-2	intr
IRIS_313-8277	3268491	29635224	0.1103	Cote d'Ivoire	inc	WAF	GJ-trp	K 2 C 14::IRGC 68549-1	intr
IRIS_313-11104	2636325	29635224	0.08896	Liberia	inc	WAF	GJ-trp	D 3-102::IRGC 30972-1	intr
IRIS_313-11103	2531013	29635224	0.08541	Liberia	inc	WAF	GJ-trp	D 1-147::IRGC 30894-2	intr
IRIS_313-11759	2285713	29635224	0.07713	Cote d'Ivoire	inc	WAF	GJ-trp	K 2 C 45::IRGC 68552-1	intr
IRIS_313-11755	2273259	29635224	0.07671	Liberia	inc	WAF	GJ-trp	A 2-257::IRGC 68342-1	intr
IRIS_313-11540	3766534	29635224	0.1271	Guinea	T	WAF	GJ-trp	PATIE ROUGE::IRGC 57686-1	intr
IRIS_313-11524	3616235	29635224	0.122	Cote d'Ivoire	T	WAF	GJ-trp	KOUINONEPOU::IRGC 56663-1	intr
IRIS_313-11526	3227641	29635224	0.1089	Cote d'Ivoire	T	WAF	GJ-trp	FOSSA (GBE)::IRGC 56767-1	intr
IRIS_313-12018	2901053	29635224	0.09789	Sierra Leone	T	WAF	GJ-trp	FRENSI GBOI::IRGC 79983-1	intr
IRIS_313-11658	2881552	29635224	0.09723	Sierra Leone	T	WAF	GJ-trp	MANYALOJOPOIHUN::IRGC 63350-1	intr

## Sheet: Table S3
Supplementary Table S3 : Detailed analysis of the cAus introgression on chromosome 6, located between 17.9 and 21.7 Mb
IRIS ID	SUBPOPULATION				17904819	17905605	17959094	17990114	18093321	18810844	18812983	18928136	19264097	19281019	19324334	19400264	19464767	19504818	19531870	19700319	19781614	19787918	19872958	19940117	19951967	19962262	20057116	20224629	20225614	20460110	20403748	20462635	20466331	20484410	20764319	20773958	20954625	20973464	21017834	21125490	21145312	21178680	21232700	21239931	21329617	21338836	21354785	21401681	21459520
IRIS 313-8690	GJ-adm	36	Vietnam	As4	C	c	G	G	G	t	A	A	g	t	g	g	t	g	T	g	c	c	g	c	t	g	g	G	G	C	t	G	G	T	G	a	t	g	A	C	g	A	G	c	C	C	C	C	C
IRIS 313-11788	GJ-adm	37	Philippines	As5	C	c	G	G	G	t	A	A	g	t	g	g	t	g	T	g	c	c	g	c	t	g	g	G	G	C	t	G	G	T	G	a	t	g	A	C	g	A	G	c	C	C	C	C	C
IRIS 313-10744	GJ-trp	54	Indonesia	As5	C	c	G	G	G	t	A	A	g	t	g	g	t	g	T	g	c	c	g	c	t	g	g	G	G	C	t	G	G	T	G	a	t	g	A	C	g	A	G	c	C	C	C	C	C
B070	GJ-adm	51	C	As6	C	c	G	G	G	t	nd	A	g	t	g	g	t	g	T	g	c	c	g	c	t	g	g	G	G	C	t	G	G	T	G	a	t	g	A	C	g	A	G	c	C	C	C	C	C
IRIS 313-7912	GJ-trp	73	IvoryCoast	Af1	§a	c	G	G	G	t	A	A	g	t	g	g	t	g	T	g	c	c	g	c	t	g	g	G	G	C	t	G	G	T	G	a	t	g	A	C	g	A	G	c	C	C	C	C	C
IRIS 313-8523	GJ-trp	75	Nigeria	Af1	§a	c	G	G	G	t	A	A	g	t	g	g	t	g	T	g	c	c	g	c	t	g	g	G	G	C	t	G	G	T	G	a	t	g	A	C	g	A	G	c	C	C	C	C	C
IRIS 313-12021	GJ-trp	76	Nigeria	Af1	§a	c	G	G	G	t	A	A	g	t	g	g	t	g	T	g	c	c	g	c	t	g	g	G	G	C	t	G	G	T	G	a	t	g	A	C	g	A	G	c	C	C	C	C	C
IRIS 313-7838	GJ-trp	74	Senegal	Af1	§a	c	G	G	G	t	A	A	g	t	g	g	t	g	T	g	c	c	g	c	t	g	g	G	G	C	t	G	G	T	G	a	t	g	A	C	g	A	G	c	C	C	C	C	C
CX220	GJ-trp	79	Brazil	Am	§a	c	G	G	G	t	A	A	g	t	g	g	t	g	T	g	c	c	g	c	t	g	g	G	G	C	t	G	G	T	G	a	t	g	A	C	g	A	G	c	C	C	C	C	C
IRIS 313-11103	GJ-trp	60	Liberia	Af1	§a	&t	&a	&t	&a	&a	&g	&c	&t	&a	g	&t	&a	&a	&c	&a	&t	c	&t	&t	&c	&a	g	&a	&a	C	t	G	G	T	G	a	t	g	A	C	g	A	G	c	C	C	C	C	C
IRIS 313-11104	GJ-trp	61	Liberia	Af1	§a	&t	&a	&t	&a	&a	&g	&c	&t	&a	g	&t	&a	&a	&c	&a	&t	c	&t	&t	&c	&a	g	&a	&a	C	t	G	G	T	G	a	t	g	A	C	g	A	G	c	C	C	C	C	C
IRIS 313-11759	GJ-trp	57	IvoryCoast	Af1	§a	&t	&a	&t	&a	&a	&g	&c	&t	&a	g	&t	&a	&a	&c	&a	&t	c	&t	&t	&c	&a	g	&a	&a	&t	t	&t	&a	&c	&a	a	&c	g	&c	&t	&a	&t	&c	c	&t	&t	&t	&t	&t
IRIS 313-11755	GJ-trp	58	Liberia	Af1	§a	&t	&a	&t	&a	&a	&g	&c	&t	&a	g	&t	&a	&a	&c	&a	&t	c	&t	&t	&c	&a	g	&a	&a	&t	t	&t	&a	&c	&a	a	&c	§a	&c	&t	&a	&t	&c	§t	&t	&t	&t	&t	&t
IRIS 313-12018	GJ-trp	59	SierraLeone	Af1	§a	&t	&a	&t	&a	&a	&g	&c	&t	&a	g	&t	&a	&a	&c	&a	&t	c	&t	&t	&c	&a	g	&a	&a	C/ &t	t	&t	&a	&c	&a	§t	&c	g	&c	&t	&a	&t	&c	c	&t	&t	C/ &t	&t	&t
IRIS 313-11658	GJ-trp	62	SierraLeone	Af1	§a	&t	&a	&t	&a	&a	&g	&c	&t	&a	g	&t	&a	&a	&c	&a	&t	c	&t	&t	&c	&a	g	&a	&a	&t	t	&t	&a	&c	&a	a	&c	g	&c	&t	&a	&t	G/ &c	c	&t	&t	&t	&t	&t
IRIS 313-11376	GJ-trp	63	IvoryCoast	Af1	§a	&t	nd	&t	&a	&a	&g	&c	&t	&a	g	&t	&a	&a	&c	&a	&t	c	&t	&t	&c	&a	g	&a	&a	nd	t	&t	&a	&c	&a	a	&c	g	&c	C/ &t	G&a	&t	&c	c	&t	&t	&t	&t	&t
IRIS 313-11526	GJ-trp	64	IvoryCoast	Af1	§a	&t	&a	&t	&a	&a	&g	&c	&t	&a	g	&t	&a	&a	&c	&a	&t	c	&t	&t	&c	&a	g	&a	&a	&t	t	&t	&a	&c	&a	a	&c	g	&c	&t	&a	&t	&c	c	&t	&t	&t	&t	&t
IRIS 313-8277	GJ-trp	65	IvoryCoast	Af1	§a	&t	&a	&t	&a	&a	&g	&c	&t	&a	g	&t	&a	&a	&c	&a	&t	c	&t	&t	&c	&a	g	&a	&a	&t	t	&t	&a	&c	&a	a	&c	g	&c	&t	&a	&t	&c	c	&t	&t	&t	&t	&t
IRIS 313-11109	GJ-trp	66	Liberia	Af1	§a	&t	&a	&t	&a	&a	&g	&c	&t	&a	g	&t	&a	&a	&c	&a	&t	c	&t	&t	&c	&a	§a	&a	&a	&t	t	&t	&a	&c	&a	a	&c	g	&c	&t	G&a	&t	&c	c	&t	&t	&t	&t	&t
IRIS 313-10712	GJ-trp	67	IvoryCoast	Af1	§a	&t	&a	&t	&a	&a	&g	&c	&t	&a	g	&t	&a	&a	&c	nd	&t	c	&t	&t	&c	&a	g	&a	&a	&t	§a	&t	&a	&c	&a	a	&c	g	&c	&t	&a	&t	&c	c	&t	&t	&t	&t	&t
IRIS 313-11524	GJ-trp	68	IvoryCoast	Af1	§a	&t	&a	&t	&a	&a	&g	&c	&t	&a	g	&t	&a	nd	&c	nd	&t	c	&t	&t	&c	&a	g	G/ &a	&a	&t	t	&t	&a	&c	&a	a	T&c	g	&c	&t	&a	&t	&c	c	&t	C/ &t	&t	&t	&t
IRIS 313-11540	GJ-trp	69	Guinea	Af1	§a	&t	&a	&t	&a	&a	&g	&c	&t	&a	g	&t	&a	&a	&c	&a	&t	c	&t	&t	&c	&a	g	&a	&a	&t	t	&t	&a	&c	&a	a	&c	g	&c	&t	&a	&t	&c	c	&t	&t	&t	&t	&t
B189	GJ-trp	70	IvoryCoast	Af1	§a	&t	&a	&t	&a	&a	&g	&c	G/ &t	&a	g	&t	&a	&a	&c	&a	&t	c	&t	&t	&c	&a	g	&a	&a	&t	t	&t	&a	&c	&a	a	&c	g	&c	&t	&a	&t	&c	c	&t	&t	&t	&t	&t
IRIS 313-11105	GJ-trp	71	Liberia	Af1	§a	&t	&a	&t	&a	&a	&g	&c	&t	&a	§c	&t	&a	&a	&c	&a	&t	c	&t	&t	&c	&a	g	&a	&a	&t	t	&t	&a	&c	&a	a	&c	g	&c	&t	&a	&t	&c	c	&t	&t	&t	&t	nd
CX113	GJ-trp	219	0	0	§a	nd	&a	&t	&a	&a	&g	&c	&t	nd		&t	&a	&a	&c	&a	&t	c	&t	nd	&c	&a	nd	&a	&a	&t	nd	&t	&a	&c	&a	nd	nd	nd	&c	&t	nd	&t	&c	nd	&t	&t	&t	&t	nd
IRIS 313-11121	GJ-trp	72	Liberia	Af1	nd	&t	&a	&t	&a	nd	&g	&c	&t	T	g	&t	&a	&a	&c	&a	nd	c	&t	c	nd	&a	g	&a	&a	nd	t	&t	&a	&c	&a	a	&c	g	&c	&t	&a	&t	&c	c	C	&t	nd	&t	&t
IRIS 313-11342	XI-adm	603	Philippines	As5	C	c	G	G	&a	&a	&g	&c	&t	&a	g	&t	&a	&a	&c	&a	&t	c	&t	c&t	&c	&a	g	&a	&a	&t	t	nd	&a	&c	&a	a	&c	g	&c	&t	G&a	&t	&c	c	&t	&t	&t	&t	&t
IRIS 313-8288	XI-adm	662	Madagascar	Mad	C	c	G	G	G	t	A	A	g	t	g	g	t	g	T	g	c	c	g	c&t	t	g	g	G	&a	&t	t	&t	&a	&c	G	a	&c	g	&c	&t	g	&t	&c	c	C	C	C	C	&t
IRIS 313-7646	admix	2234	Madagascar	Mad	C	c	G	G	G	t	A	A	g	t	g	g	t	g	T	g	c	c	g	c	t	g	g	G	&a	C/ &t	t	G/ &t	G/ &a	&c	G	a	T&c	g	A/ &c	C/ &t	g	A/ &t	G/ &c	c	C	C	C	C	C/ &t
IRIS 313-12065	admix	194	Nigeria	Af1	C	c	G	G	G	nd	A	A	G	T	g	G	T	G	&c	&a	&t	&t	G	c	T	G	g	G	G	&t	t	G	G/ &a	T	G	a	&c	g	A	C	g	A	&c	c	C	C	C	C	&t
IRIS 313-11663	admix	196	Zimbabwe	Af3	C	c	G	G	G	T	A	A	G	T	g	G	T	G	&c	&a	&t	&t	G	c&t	T	G	g	G	G	&t	t	G	&a	T	G	a	&c	g	A	C	g	A	&c	c	C	C	C	C	&t
IRIS 313-9778	admix	197	Argentina	Am	C	c	G	G	G	T	A	A	G	T	g	G	T	G	&c	&a	&t	&t	G	c	T	G	g	G	G	&t	t	G	G/ &a	T	G	a	&c	g	A	C	g	A	&c	c	C	C	C	C	&t
IRIS 313-10048	XI-adm	597	Benin	Af1	C	c	G	G	G	T	A	A	G	T	g	G	T	G	&c	&a	&t	&t	G	c	T	G	g	G	G	&t	t	G	&a	T	G	a	&c	g	A	C	g	A	&c	c	C	C	C	C	&t
IRIS 313-11497	XI-2	590	Indonesia	As5	C	c	G	G	G	T	A	A	G	T	g	G	T	G	T	G	&t	c	G	c	T	G	g	G	G	&t	t	G	&a	T	G	a	&c	g	A	C	g	A	G	c	C	C	C	C	C
IRIS 313-11453	XI-2	483	India	As2	C	c	G	G	G	t	A	A	g	t	g	g	t	g	T	g	c	c	g	c	t	g	g	G	G	&t	t	G	&a	T	G	a	&c	g	A	C	g	A	G	c	C	C	C	C	C
IRIS 313-11478	XI-2	685	India	As2	C	c	G	G	G	t	A	A	g	t	g	g	t	g	T	g	c	c	g	c	t	g	g	G	G	&t	t	G	&a	T	G	a	&c	g	A	C	g	A	G	c	C	C	C	C	C
IRIS 313-7799	XI-2	516	Madagascar	Mad	C	c	G	G	G	t	A	A	g	t	g	g	t	g	T	g	c	c	g	c	t	g	g	G	G	C	t	G	G	T	G	a	t	g	A	C	g	A	G	c	C	C	C	C	&t
IRIS 313-7720	XI-2	584	Madagascar	Mad	C	c	G	G	G	t	A	A	g	t	g	g	t	g	T	g	c	c	g	c	t	g	g	G	G	C	t	G	G	T	G	a	t	g	A	C	g	A	G	c	C	C	C	C	&t
IRIS 313-9610	cA (Aus)	391	India	As2	C	c	G	G	G	t	A	A	g	t	g	g	t	g	T	g	c	c	g	c	t	g	g	G	G	&t	t	G	&a	T	G	a	&c	g	&c	C	g	A	G	c	C	C	C	C	C
IRIS 313-11963	cA (Aus)	274	India	As2	C	&t	G	G	G	t	A	A	g	t	g	g	t	g	T	g	c	c	g	c	t	g	g	G	G	C	t	G	G	T	G	a	t	g	A	C	g	A	G	c	C	C	C	C	C
IRIS 313-11055	cA (Aus)	283	Bangladesh	As2	C	&t	G	G	G	t	A	A	g	t	g	g	t	g	T	g	c	c	g	c	t	g	g	G	G	C	t	G	G	T	G	a	t	g	A	C	g	A	G	c	C	C	C	C	C
IRIS 313-11458	cA (Aus)	287	India	As2	C	&t	G	G	G	t	A	A	g	t	g	g	t	g	T	g	c	c	g	c	t	g	g	G	G	C	t	G	G	T	G	a	t	g	A	C	g	A	G	c	C	C	C	C	C
IRIS 313-8398	cA (Aus)	302	Pakistan	As1	C	&t	G	G	G	t	A	A	g	t	g	g	t	g	T	g	c	c	g	c	t	g	g	G	G	C	t	G	G	T	G	a	t	g	A	C	g	A	G	c	C	C	C	C	C
CX227	cA (Aus)	33	Japan	As7	C	&t	G	G	G	t	A	A	g	t	g	g	t	g	T	g	c	c	g	c	t	g	g	G	G	C	t	G	G	T	G	a	t	g	A	C	g	A	G	c	C	C	C	C	C
IRIS 313-11027	cA (Aus)	23	Pakistan	As1	C	c	G	G	G	t	A	A	g	t	g	g	t	g	T	g	c	c	g	c	t	g	g	G	G	C	t	G	G	T	G	a	t	g	A	C	g	A	G	c	C	C	C	C	C
IRIS 313-11737	cA (Aus)	25	India	As2	C	c	G	G	G	t	A	A	g	t	g	g	t	g	T	g	c	c	g	c	t	g	g	G	G	C	t	G	G	T	G	a	t	g	A	C	g	A	G	c	C	C	C	C	C
IRIS 313-8864	cA (Aus)	26	Bangladesh	As2	C	c	G	G	G	t	A	A	g	t	g	g	t	g	T	g	c	c	g	c	t	g	g	G	G	C	t	G	G	T	G	a	t	g	A	C	g	A	G	c	C	C	C	C	C
IRIS 313-11353	cA (Aus)	410	India	As2	C	c	G	G	G	t	A	A	g	t	g	g	t	g	T	g	c	c	g	c	t	g	g	G	G	C	t	G	G	T	G	a	t	g	A	C	g	A	G	c	C	C	C	C	C
[truncated: 8 more columns]

## Sheet: Table S4
Supplementary Table S4 : Tropical japonica accessions having cAus introgression on chromosome 6 are listed below
ID	varname	extra infos access	country	cAus introgression Length
IRIS_313-11755	A 2-257::IRGC 68342-1	https://gringlobal.irri.org/gringlobal/accessiondetail?id=68342	Liberia	3.8 Mb
IRIS_313-11109	B 106::IRGC 31352-1	https://gringlobal.irri.org/gringlobal/accessiondetail?id=31352	Liberia	3.8 Mb
IRIS_313-11103	D 1-147::IRGC 30894-2	https://gringlobal.irri.org/gringlobal/accessiondetail?id=30894	Liberia	2.36 Mb
IRIS_313-11104	D 3-102::IRGC 30972-1	https://gringlobal.irri.org/gringlobal/accessiondetail?id=30972	Liberia	2.36 Mb
IRIS_313-11105	D 3-130::IRGC 30986-2	https://gringlobal.irri.org/gringlobal/accessiondetail?id=30986	Liberia	3.8 Mb
IRIS_313-11526	FOSSA (GBE)::IRGC 56767-1	https://gringlobal.irri.org/gringlobal/accessiondetail?id=56767	Ivory Coast	3.8 Mb
IRIS_313-12018	FRENSI GBOI::IRGC 79983-1	https://gringlobal.irri.org/gringlobal/accessiondetail?id=79983	Sierra Leone	3.8 Mb
IRIS_313-11121	GBRA::IRGC 32474-2	https://gringlobal.irri.org/gringlobal/accessiondetail?id=32474	Liberia	3.8 Mb
B189	IRAT 669	NA	Ivory Coast	3.8 Mb
IRIS_313-8277	K 2 C 14::IRGC 68549-1	https://gringlobal.irri.org/gringlobal/accessiondetail?id=68549	Ivory Coast	3.8 Mb
IRIS_313-11759	K 2 C 45::IRGC 68552-1	https://gringlobal.irri.org/gringlobal/accessiondetail?id=66552	Ivory Coast	3.8 Mb
IRIS_313-10712	KOTO OURA S 5::IRGC 15155-1	https://gringlobal.irri.org/gringlobal/accessiondetail?id=15155	Ivory Coast	3.8 Mb
IRIS_313-11524	KOUINONEPOU::IRGC 56663-1	https://gringlobal.irri.org/gringlobal/accessiondetail?id=56663	Ivory Coast	3.8 Mb
IRIS_313-11658	MANYALOJOPOIHUN::IRGC 63350-1	https://gringlobal.irri.org/gringlobal/accessiondetail?id=63350	Sierra Leone	3.8 Mb
IRIS_313-11540	PATIE ROUGE::IRGC 57686-1	https://gringlobal.irri.org/gringlobal/accessiondetail?id=57686	Guinea	3.8 Mb
IRIS_313-11376	TOS 7536::IRGC 46985-2	https://gringlobal.irri.org/gringlobal/accessiondetail?id=46985	Ivory Coast	3.8 Mb

## Sheet: Table S5
Supplementary Table S5 : Results of Patterson's D statistic using ABBA-BABA tests
chromosomes	D-statistic	Z	err	SD
1	-0.175715	-1.52079	0.115541	0.766415
2	-0.148572	-1.61708	0.0918768	0.551261
3	-0.285367	-3.11567	0.0915909	0.557125
4	-0.261779	-2.53597	0.103226	0.619359
5	0.113928	0.666367	0.170969	0.936438
6	0.552885	4.39646	0.125757	0.711388
7	0.0239585	0.246136	0.0973388	0.533147
8	-0.29519	-4.80204	0.0614719	0.331036
9	-0.371402	-5.38214	0.0690064	0.330943
10	0.122919	0.751868	0.163485	0.800908
11	-0.0293742	-0.313244	0.093774	0.513621
12	-0.0802081	-0.548781	0.146157	0.773389

## Sheet: Table S6
Supplementary Table S6 : iHS genomic scan results on chromosome 6 of the West African tropical japonica population
CHR	POSITION	IHS	LOGPVALUE
6	18094707	-7.24271	12.3567
6	27773994	-6.23188	9.33642
6	27773234	-6.193	9.22893
6	27773273	-6.193	9.22893
6	27773462	-6.193	9.22893
6	19382660	-6.12603	9.04527
6	29831828	-5.74073	8.02563
6	19578490	-5.62164	7.72319
6	1522400	-5.44527	7.28629
6	27773030	-5.31957	6.9829
6	27774079	-5.30718	6.95338
6	19968767	-5.21438	6.73417
6	19558210	-5.19598	6.69112
6	19503742	-5.13235	6.54342
6	26205439	-5.02072	6.28838
6	19996514	-4.99985	6.24127
6	1562045	-4.96028	6.15248
6	27772533	-4.94506	6.11849
6	18103098	-4.92328	6.07004
6	27774176	-4.83368	5.87279
6	15997889	4.58526	5.3435
6	19957802	-4.40823	4.98205
6	25470378	-4.38389	4.93338
6	5917079	-4.29105	4.75
6	17756727	-4.28632	4.74075
6	26042666	-4.2781	4.7247
6	13266156	-4.25398	4.67777
6	19966273	-4.23642	4.64376
6	4377832	4.15981	4.49687
6	4377834	4.15981	4.49687
6	4252865	4.11592	4.41382
6	11009170	-4.10799	4.39889
6	13258241	-4.08195	4.35008
6	16637162	4.07228	4.33204
6	16637181	4.07228	4.33204
6	19383369	-4.06111	4.31123
6	5345018	4.03227	4.25773
6	18093088	-4.02979	4.25315
6	27010316	-4.01462	4.22518
6	16636726	4.0118	4.21999
6	16636762	4.0118	4.21999
6	16636801	4.0118	4.21999
6	16636950	4.0118	4.21999
6	16636973	4.0118	4.21999
6	16637024	4.0118	4.21999
6	5913408	-4.01134	4.21914
6	12279463	-4.00625	4.20978
6	27771504	-3.99199	4.18363
6	27771728	-3.99021	4.18036
6	27771837	-3.98942	4.17891
6	27771852	-3.98942	4.17891
6	21100255	-3.98814	4.17657
6	10285017	-3.95814	4.12185
6	18092863	-3.94343	4.09515
6	10066029	3.93469	4.07933
6	10065210	3.9161	4.04579
6	6241167	-3.91378	4.04161
6	17324538	-3.88367	3.98763
6	22105764	3.86205	3.94907
6	10072365	3.85649	3.93919
6	27772583	-3.83684	3.90439
6	10118209	-3.83164	3.89519
6	13083121	-3.82166	3.87759
6	16549222	-3.78604	3.81513
6	22085626	3.7814	3.80702
6	4363670	3.74554	3.74472
6	16638002	3.73171	3.72083
6	16638136	3.73171	3.72083
6	24007430	-3.72763	3.7138
6	6514959	-3.72162	3.70345
6	12233201	-3.72097	3.70234
6	1606716	-3.70677	3.67794
6	18928160	-3.70347	3.6723
6	19579877	-3.69323	3.65478
6	23952081	-3.69284	3.65412
6	13120660	-3.67766	3.62823
6	15997654	3.67341	3.62099
6	4377592	3.67211	3.61879
6	18104054	3.65107	3.58312
6	18104117	3.65107	3.58312
6	19941619	-3.63873	3.56228
6	19941650	-3.63873	3.56228
6	10063509	-3.63223	3.55132
6	1603949	-3.63046	3.54834
6	18101221	-3.62208	3.53426
6	23000255	3.61444	3.52144
6	18102610	3.60179	3.50026
6	18102858	3.60179	3.50026
6	18103725	3.58644	3.47466
6	4282322	3.55048	3.41507
6	4282340	3.55048	3.41507
6	26430844	-3.52794	3.37798
6	4377814	3.52391	3.37138
6	19993483	-3.51125	3.35066
6	25349156	-3.5084	3.34601
6	17731181	-3.50077	3.33357
6	2093430	3.49578	3.32543
6	13455896	-3.49063	3.31706
6	5981212	-3.49038	3.31665
6	12013652	3.48853	3.31365
6	19558027	-3.47754	3.29582
6	16638485	3.47601	3.29333
6	16636057	3.47517	3.29197
6	16636058	3.47517	3.29197
6	25354630	-3.45111	3.25315
6	4377905	3.4491	3.24992
6	4377913	3.4491	3.24992
6	4377914	3.4491	3.24992
6	4377924	3.4491	3.24992
6	18096931	3.44173	3.23806
6	4378055	3.42416	3.20993
6	18097159	3.41035	3.18789
6	1511270	-3.39544	3.1642
6	1508002	-3.38346	3.14521
6	13450773	-3.38267	3.14396
6	20003613	-3.37889	3.138
6	26459935	-3.37867	3.13764
6	17358460	3.37809	3.13673
6	1682967	-3.3695	3.12318
6	11912782	3.36928	3.12283
6	20151466	-3.36188	3.11119
6	13086482	-3.35356	3.09811
6	1916461	3.35092	3.09397
6	26543224	-3.33945	3.07601
6	4377622	3.33129	3.06326
6	4377625	3.33129	3.06326
6	16638977	3.32594	3.05493
6	16639017	3.32594	3.05493
6	16637327	3.32371	3.05145
6	16640388	3.32266	3.04981
6	22001675	3.32045	3.04638
6	21063760	-3.32028	3.04612
6	14274876	-3.30636	3.02449
6	25951047	-3.30572	3.0235
6	14492567	3.29834	3.01207
6	14492673	3.29501	3.00693
6	14492676	3.29501	3.00693
6	15807880	-3.29367	3.00485
6	14492401	3.29292	3.00369
6	14492433	3.29292	3.00369
6	14492451	3.29292	3.00369
6	14492454	3.29292	3.00369
6	4398133	3.29276	3.00345
6	1514186	-3.2697	2.96793
6	5509450	3.26641	2.96288
6	19928924	-3.26535	2.96127
6	19826520	-3.26491	2.96059
6	14493853	3.26373	2.95877
6	14493862	3.26373	2.95877
6	13082895	-3.26154	2.95543
6	25097012	-3.25688	2.9483
6	5509690	3.2557	2.94649
6	19936693	-3.25481	2.94512
6	16639810	3.25157	2.94017
6	16639815	3.25157	2.94017
6	4399412	3.25035	2.93831
6	5916310	-3.2493	2.9367
6	5916337	-3.24914	2.93646
6	24081977	-3.24493	2.93004
6	6175904	-3.24466	2.92963
6	4368557	3.24338	2.92767
6	17325431	-3.2426	2.92648
6	20149577	-3.24164	2.92502
6	14492901	3.23737	2.91852
6	14492949	3.23737	2.91852
6	14493064	3.2373	2.91842
6	14493091	3.2373	2.91842
6	14493102	3.2373	2.91842
6	14493135	3.2373	2.91842
6	20149149	-3.23142	2.90947
6	14492780	3.22815	2.9045
6	14492786	3.22815	2.9045
6	14492814	3.22815	2.9045
6	14492878	3.22815	2.9045
6	25096033	-3.2097	2.87656
6	16637100	3.2072	2.87278
6	17937601	-3.20105	2.86351
6	21702708	3.19431	2.85335
6	5916732	-3.1923	2.85034
6	5916287	-3.18622	2.84119
6	19971676	-3.18373	2.83746
6	1645941	-3.17785	2.82865
6	1636619	-3.17756	2.82822
6	11009346	-3.1726	2.8208
6	1644541	-3.16908	2.81552
6	1703204	-3.1624	2.80555
6	14808214	-3.16125	2.80384
6	5916957	-3.15647	2.79671
6	5916960	-3.15647	2.79671
6	5916973	-3.15647	2.79671
6	5917059	-3.15647	2.79671
6	5917064	-3.15647	2.79671
6	1543989	-3.14852	2.7849
6	20151776	-3.14822	2.78445
6	5917140	-3.1451	2.77981
6	19922588	-3.14111	2.77389
6	1647302	-3.13935	2.77129
6	1648321	-3.13124	2.75928
6	21195689	-3.13103	2.75897
6	4400398	3.12737	2.75356
6	10057299	3.12543	2.75069
6	13236867	-3.12482	2.7498
6	5912117	-3.12057	2.74353
6	1622627	-3.1182	2.74003
6	25465921	-3.11421	2.73414
6	1513997	-3.09964	2.71274
6	21145252	3.09906	2.7119
6	13453391	-3.09734	2.70937
6	19571983	-3.08572	2.69238
6	23103515	3.08506	2.69141
6	1677596	-3.08298	2.68837
6	10056630	3.08096	2.68543
6	13258305	-3.08042	2.68464
6	5395867	3.08019	2.68431
6	17233087	3.07758	2.6805
6	17232985	3.07704	2.67972
6	17760413	-3.07657	2.67903
6	17233188	3.07417	2.67553
6	1646696	-3.07316	2.67406
6	25388134	-3.07208	2.67249
6	18097538	3.06995	2.6694
6	25402959	-3.06734	2.66559
6	4375222	3.06703	2.66515
6	22075082	3.06457	2.66157
6	22104921	3.06334	2.65979
6	1646551	-3.06165	2.65734
6	5511464	3.06097	2.65635
6	5511251	3.05731	2.65105
6	26205442	-3.05619	2.64943
6	20149137	-3.05546	2.64837
6	4283097	3.05397	2.64621
6	4283076	3.05192	2.64324
6	13141815	-3.04999	2.64045
6	15998050	3.04802	2.63761
6	20149055	-3.04791	2.63744
6	1654355	-3.04145	2.62811
6	15699552	-3.03215	2.61472
6	18096907	3.02883	2.60994
6	20152365	-3.0274	2.60788
6	19580734	-3.02735	2.60781
6	19392046	-3.02634	2.60636
6	20151099	-3.0185	2.59511
6	20151210	-3.0185	2.59511
6	20150552	-3.01838	2.59495
6	24600055	3.01566	2.59105
6	22075468	3.0069	2.57852
6	26556718	-3.0063	2.57767
6	17893902	-3.00589	2.57708
6	20151968	-3.00329	2.57336
6	1540109	-3.00325	2.57331
6	18097098	2.99935	2.56774
6	20149548	-2.99933	2.56771
6	18096971	2.99931	2.56768
6	16638174	2.99834	2.56631
6	16637664	2.99794	2.56573
6	1651220	-2.99662	2.56386
6	22075759	2.99639	2.56352
6	17363839	2.99235	2.55777
6	20151422	-2.9918	2.55699
6	10121993	-2.99063	2.55533
6	18097516	2.98939	2.55357
6	20150369	-2.98939	2.55356
6	14493446	2.98318	2.54474
6	14493566	2.98318	2.54474
6	25291634	-2.97922	2.53913
6	4208255	2.97465	2.53265
6	5895222	-2.96919	2.52493
6	15798557	-2.96794	2.52316
6	17232610	2.96691	2.5217
6	20442829	-2.96356	2.51698
6	1701885	-2.96262	2.51565
6	22076216	2.94455	2.49023
6	1259771	2.94156	2.48603
6	10063846	-2.93886	2.48225
6	5509381	2.93724	2.47997
6	12069449	-2.9368	2.47936
6	1459246	-2.93648	2.47891
6	17364832	2.93388	2.47528
6	5914349	-2.93114	2.47144
6	5914365	-2.93114	2.47144
6	5368961	2.93084	2.47103
6	23854560	-2.92956	2.46923
6	19956109	-2.92329	2.46048
6	10289711	-2.92211	2.45883
6	13223307	-2.9122	2.44504
6	18097218	2.90948	2.44125
6	20151282	-2.9076	2.43864
6	6234078	-2.9064	2.43698
6	25288231	-2.90497	2.43499
6	18102144	2.90496	2.43497
6	18102156	2.90496	2.43497
6	18102238	2.90496	2.43497
6	18102285	2.90496	2.43497
6	18101918	2.90479	2.43475
6	30158974	-2.90315	2.43247
6	1406972	-2.90282	2.43202
6	16638233	2.89829	2.42573
6	16638243	2.89829	2.42573
6	25289052	-2.89607	2.42266
6	10085758	-2.89132	2.41609
6	5913377	-2.88805	2.41157
6	1459044	-2.88788	2.41133
6	4234625	2.88782	2.41125
6	4234649	2.88682	2.40988
6	4228601	2.88473	2.40699
6	16547100	2.88442	2.40657
6	24678609	2.88295	2.40454
6	5917464	-2.88179	2.40294
6	5917476	-2.88179	2.40294
6	5917493	-2.88179	2.40294
6	5917516	-2.88179	2.40294
6	5917524	-2.88179	2.40294
6	5917570	-2.88179	2.40294
6	5917829	-2.88179	2.40294
6	4370855	2.88172	2.40285
6	30025353	-2.88147	2.40249
6	4234691	2.87707	2.39644
6	15845606	-2.87699	2.39633
6	24672325	2.87411	2.39237
6	17233121	2.87274	2.39048
6	26223055	-2.87183	2.38923
6	17661993	-2.86668	2.38216
6	11236231	-2.86639	2.38176
6	13264813	-2.86471	2.37946
6	1661990	-2.86002	2.37303
6	1661995	-2.86002	2.37303
6	6368332	-2.85978	2.3727
6	16638617	2.85928	2.37201
6	1661062	-2.85747	2.36954
6	4371044	2.85611	2.36768
6	11653624	2.85455	2.36554
6	16637638	2.85424	2.36512
6	1664403	-2.85344	2.36403
6	13264542	-2.84844	2.3572
6	5916256	-2.84718	2.35548
6	5914271	-2.84695	2.35516
6	5914398	-2.84689	2.35509
6	6368300	-2.84647	2.3545
6	5918380	-2.84439	2.35168
6	5918423	-2.84439	2.35168
6	5917383	-2.84429	2.35153
6	5917398	-2.84429	2.35153
6	5917400	-2.84429	2.35153
6	5917402	-2.84429	2.35153
6	15997681	2.84271	2.34938
6	25358801	-2.83875	2.34399
6	1450455	-2.8356	2.3397
6	4364787	2.83449	2.3382
6	20533167	-2.83314	2.33636
6	13452516	-2.83168	2.33439
6	5917444	-2.83168	2.33438
6	5913405	-2.82586	2.32649
6	18103165	2.8214	2.32044
6	16638782	2.82012	2.31871
6	16638828	2.82012	2.31871
6	1658377	-2.81669	2.31407
6	5505518	2.81588	2.31298
6	13958751	-2.81378	2.31013
6	13967223	-2.81342	2.30964
6	4369813	2.81184	2.30751
6	4369815	2.81184	2.30751
6	17329134	2.81174	2.30738
6	5510285	2.81108	2.30649
6	5510306	2.81108	2.30649
6	5510560	2.81108	2.30649
6	1656581	-2.80645	2.30024
6	20625408	-2.80321	2.29588
6	21146828	-2.80097	2.29286
6	24603812	2.79987	2.29138
6	5384338	2.79697	2.28748
6	5917868	-2.79571	2.2858
6	5917884	-2.79571	2.2858
6	18092400	-2.79247	2.28143
6	5914912	-2.79043	2.2787
6	27771110	-2.78972	2.27775
6	4370206	2.78904	2.27683
6	4370213	2.78904	2.27683
6	4370218	2.78904	2.27683
6	9007766	-2.78831	2.27586
6	15586133	-2.78785	2.27524
6	14162259	-2.78254	2.26813
6	5918263	-2.78145	2.26667
6	17233428	2.78125	2.2664
6	17233441	2.78125	2.2664
6	10558345	-2.7803	2.26513
6	17233473	2.77972	2.26435
6	5918336	-2.77785	2.26186
6	1659985	-2.77627	2.25975
6	1394522	-2.76777	2.2484
6	4231743	2.76387	2.2432
6	14270339	-2.76273	2.24169
6	17232393	2.7598	2.2378
6	4228367	2.75932	2.23716
6	26309858	-2.75791	2.23528
6	18104438	2.75668	2.23366
6	19920553	-2.74884	2.22325
6	12327647	-2.74733	2.22126
6	5913417	-2.74613	2.21967
6	17905584	-2.74472	2.21779
6	19965955	-2.74343	2.21608
6	5917435	-2.73879	2.20996
6	16640534	2.73715	2.20779
6	4363536	2.73596	2.20621
6	17233225	2.73403	2.20368
6	13453525	2.73249	2.20164
6	19909500	-2.72738	2.19491
6	24644771	2.72609	2.19321
6	1653055	-2.72528	2.19214
6	22105692	2.72434	2.19091
6	13259963	-2.72393	2.19037
6	18096379	2.72356	2.18988
6	18096190	2.72324	2.18947
6	17232742	2.72297	2.18911
6	10055671	2.72297	2.18911
6	24673822	2.72258	2.1886
6	5942811	-2.72126	2.18686
6	23097283	2.71795	2.18251
6	17231829	2.71458	2.17809
6	17231867	2.71458	2.17809
6	17996281	-2.71402	2.17736
6	26476741	-2.7076	2.16896
6	22075413	2.70742	2.16871
6	24633305	2.70641	2.1674
6	23103462	2.6997	2.15862
6	23103206	2.69944	2.15829
6	16640086	2.69829	2.15679
6	16640421	2.69819	2.15666
6	24724143	-2.69604	2.15385
6	13453077	-2.69576	2.15349
6	17792633	-2.69398	2.15117
6	22075585	2.69289	2.14975
6	13450771	2.69277	2.14959
6	10091471	2.69154	2.148
6	24687478	2.68993	2.14589
6	24687485	2.68993	2.14589
6	19908776	-2.68959	2.14545
6	10558588	2.68822	2.14368
6	24597976	2.68817	2.14361
6	24584066	2.68792	2.14328
6	22074743	2.68777	2.14308
6	24608894	2.68606	2.14087
6	15997396	2.68513	2.13966
6	23103084	2.6844	2.1387
6	16908252	-2.68347	2.1375
6	13232183	-2.68339	2.1374
6	22104122	2.68271	2.1365
6	22104133	2.68271	2.1365
6	14492709	2.68025	2.13332
6	13086906	-2.67506	2.12659
6	13449877	-2.67482	2.12627
6	13449884	-2.67482	2.12627
6	29784561	2.6738	2.12495
6	29841154	-2.67377	2.12491
6	6724670	-2.67273	2.12357
6	20443401	-2.67263	2.12344
6	6197610	-2.6714	2.12185
6	18096611	2.66757	2.1169
6	22105391	2.66722	2.11645
6	22105392	2.66722	2.11645
6	1728910	-2.66522	2.11385
6	29780757	2.66045	2.1077
6	17359454	2.65922	2.10611
6	17232797	2.6588	2.10557
6	29783698	2.65357	2.09884
6	26384244	-2.65344	2.09867
6	10592542	2.6525	2.09746
6	17841121	-2.6501	2.09437
6	10285890	2.64941	2.09349
6	17842324	-2.64588	2.08896
6	13449836	-2.64532	2.08823
6	10558695	2.64258	2.08472
6	13495705	-2.64145	2.08328
6	20995049	2.64098	2.08266
6	1650703	-2.64093	2.0826
6	14491927	2.63929	2.08051
6	20995084	2.63697	2.07754
6	16547232	2.6362	2.07655
6	1637153	2.63285	2.07226
6	16705285	2.63276	2.07214
6	17231031	2.63062	2.06941
6	24600025	2.62917	2.06756
6	13259012	-2.62896	2.06729
6	22105629	2.62857	2.06679
6	17230219	2.62591	2.06339
6	6015888	-2.62466	2.06181
6	20577011	-2.62378	2.06068
6	16545208	2.62345	2.06026
6	10105892	2.62318	2.05992
6	14491723	2.62283	2.05946
6	18096424	2.62164	2.05795
6	5515670	2.62153	2.05782
6	17229786	2.62001	2.05587
6	17229736	2.61974	2.05553
6	17229686	2.61898	2.05457
6	29751251	2.61748	2.05266
6	18152720	-2.61682	2.05182
6	5786363	-2.61484	2.0493
6	16547390	2.61469	2.0491
6	16547484	2.61469	2.0491
6	16547535	2.61469	2.0491
6	16547562	2.61469	2.0491
6	16547609	2.61469	2.0491
6	17661903	-2.61346	2.04755
6	10097970	2.61053	2.04382
6	2021083	2.61041	2.04367
6	13232377	-2.60731	2.03974
6	838869	-2.60682	2.03912
6	10054781	-2.60575	2.03776
6	17365158	2.60538	2.03728
6	18104587	2.60424	2.03585
6	4226587	2.60378	2.03527
6	5527105	2.59875	2.02889
6	20150906	-2.598	2.02794
6	11475985	-2.59719	2.02691
6	17231268	2.59647	2.02601
6	15998180	2.59621	2.02568
6	19927370	-2.59488	2.024
6	20149532	-2.59458	2.02361
6	10180763	-2.59273	2.02128
6	17331385	-2.5926	2.02112
6	5517138	2.59085	2.01892
6	16636218	2.59061	2.0186
6	13266254	-2.58953	2.01724
6	19324917	-2.58937	2.01704
6	13453591	-2.58849	2.01594
6	30102927	-2.58811	2.01546
6	20150527	-2.58486	2.01136
6	13449849	-2.58469	2.01115
6	1659160	-2.58445	2.01085
6	22074873	2.58381	2.01004
6	13453900	-2.58344	2.00957
6	13453960	-2.58323	2.0093
6	5518900	2.58069	2.0061
6	13453988	-2.58055	2.00593
6	17365559	2.58038	2.00571
6	22076016	2.57875	2.00367
6	5515355	2.57827	2.00306
6	13083175	-2.57682	2.00124
6	16313274	-2.5746	1.99845
6	17662035	-2.57308	1.99654
6	1626063	2.57219	1.99543
6	10558336	2.57156	1.99464
6	2650606	-2.569	1.99143
6	20149209	-2.56876	1.99113
6	5926047	-2.56782	1.98996
6	13258896	-2.56635	1.98811
6	11886005	2.56448	1.98577
6	23105107	2.56199	1.98265
6	841495	-2.56128	1.98177
6	25023983	-2.5611	1.98155
6	14852218	-2.55479	1.97366
6	12683631	2.55446	1.97325
6	13260380	-2.55347	1.97202
6	29186586	-2.55232	1.97058
6	16635186	2.55166	1.96976
6	19922106	-2.55134	1.96936
6	13261922	-2.54993	1.96761
6	26712527	-2.54871	1.96608
6	29783437	2.54769	1.96481
6	20148427	-2.54691	1.96385
6	19963327	-2.54454	1.9609
6	19378827	-2.54383	1.96001
6	1625954	-2.5416	1.95724
6	16636110	2.54091	1.95639
6	13221279	-2.5396	1.95476
6	17365380	2.53943	1.95455
6	13260070	-2.53712	1.95167
6	13260124	-2.53676	1.95123
6	13260204	-2.53676	1.95123
6	17365471	2.53645	1.95084
6	22106101	2.53484	1.94885
6	1642528	2.53073	1.94376
6	14519292	2.52941	1.94212
6	22074963	2.52556	1.93737
6	22074982	2.52556	1.93737
6	22074992	2.52556	1.93737
6	22075049	2.52556	1.93737
6	17233414	2.52376	1.93514
6	17233588	2.52343	1.93473
6	17233458	2.5233	1.93457
6	17234880	2.52268	1.93381
6	17234885	2.52268	1.93381
6	22105007	2.52246	1.93354
6	22105340	2.52246	1.93354
6	10075060	2.51818	1.92825
6	10075133	2.51818	1.92825
6	22105365	2.51804	1.92809
6	22000589	2.51707	1.92689
6	1472717	-2.51669	1.92642
6	22076053	2.51546	1.92491
6	4887813	2.51529	1.9247
6	13090710	-2.51514	1.92451
6	1488911	-2.5139	1.92298
6	1689884	-2.50983	1.91797
6	13090356	-2.50802	1.91574
6	19962930	-2.50801	1.91574
6	24646879	2.50705	1.91456
6	27704888	-2.5069	1.91437
6	4234706	2.50689	1.91436
6	23131525	2.50471	1.91167
6	17411606	2.5015	1.90774
6	24678812	2.50055	1.90658
6	815935	-2.49756	1.90291
6	15997601	2.49473	1.89944
6	4234499	2.49422	1.89882
6	13232659	-2.49413	1.89871
6	13453978	-2.49392	1.89845
6	24577112	2.49257	1.8968
6	20025465	-2.49094	1.89481
6	21171940	-2.49064	1.89444
6	10074351	2.49029	1.89402
6	13083395	-2.48936	1.89288
6	13233091	-2.48895	1.89238
6	13453827	-2.48852	1.89185
6	20439083	-2.48726	1.89031
6	1478919	-2.48718	1.89022
6	20045786	-2.48695	1.88993
6	27580435	-2.48653	1.88943
6	13452716	2.48601	1.88879
6	14852685	-2.48537	1.888
6	13232819	-2.48428	1.88668
6	13232896	-2.48428	1.88668
6	13232948	-2.48428	1.88668
6	19539203	-2.48276	1.88482
6	17730741	-2.48242	1.88441
6	17235399	2.48136	1.88312
6	11864766	2.47869	1.87986
6	24662719	2.47855	1.8797
6	4234217	2.47445	1.87471
6	22090390	2.47304	1.873
6	22090394	2.47304	1.873
6	20149436	-2.47205	1.8718
6	15204495	2.47153	1.87117
6	15205889	2.47153	1.87117
6	15205896	2.47153	1.87117
6	29056281	-2.47135	1.87094
6	13454223	-2.47088	1.87037
6	13454234	-2.47088	1.87037
6	4932665	2.46667	1.86526
6	24644818	2.46514	1.8634
6	4234540	2.46443	1.86255
6	6538174	-2.46155	1.85905
6	5931589	-2.46135	1.85881
6	17229881	2.46094	1.85832
6	15206111	2.46072	1.85805
6	15206142	2.46072	1.85805
6	19948012	-2.45967	1.85678
6	20577020	-2.45802	1.85478
6	15790798	-2.45743	1.85408
6	22639945	-2.45724	1.85384
6	1506914	-2.45484	1.85095
6	11500202	-2.45448	1.8505
6	5600840	2.45358	1.84943
6	10075316	2.4531	1.84884
6	5918746	-2.45257	1.8482
6	1504480	-2.45104	1.84635
6	17233893	2.45086	1.84614
6	17233957	2.45086	1.84614
6	5918628	-2.44966	1.84469
6	21481808	-2.44889	1.84376
6	15997500	2.44654	1.84093
6	18093854	-2.44573	1.83996
6	4315692	2.44435	1.83829
6	14490257	2.44425	1.83817
6	13457663	-2.44336	1.8371
6	20149183	-2.44323	1.83695
6	30094681	-2.44235	1.83589
6	1481431	-2.44052	1.83369
6	4222978	2.43898	1.83183
6	13258052	-2.43816	1.83085
6	13258071	-2.43816	1.83085
6	13258134	-2.43816	1.83085
6	24584154	2.43808	1.83075
6	14490992	2.43731	1.82983
6	14491664	2.43731	1.82983
6	20152750	-2.43624	1.82854
6	16635586	2.43592	1.82816
6	20148811	-2.4355	1.82765
6	29053165	-2.43315	1.82484
6	1434258	-2.43251	1.82406
6	20149082	-2.43221	1.8237
6	17234402	2.43121	1.8225
6	13088903	-2.43115	1.82243
6	17234122	2.43088	1.82211
6	17234155	2.43088	1.82211
6	24632353	2.43018	1.82127
6	6574180	-2.42994	1.82098
6	29843903	-2.42816	1.81886
6	29844192	-2.42816	1.81886
6	25310622	-2.42718	1.81768
6	5928382	-2.42585	1.81609
6	26794066	-2.42584	1.81607
6	21702940	2.42573	1.81594
6	21703044	2.42573	1.81594
6	21703094	2.42573	1.81594
6	21703146	2.42573	1.81594
6	21703173	2.42573	1.81594
6	21703209	2.42573	1.81594
6	17231809	2.42571	1.81592
6	24628334	2.42229	1.81183
6	24660674	2.42174	1.81117
6	18104705	2.42101	1.8103
6	18104761	2.42101	1.8103
6	20991643	2.42	1.80909
6	20991659	2.42	1.80909
6	20991677	2.42	1.80909
6	12393810	2.41996	1.80904
6	12393333	2.41969	1.80872
6	18104473	2.41912	1.80804
6	17363730	2.4186	1.80742
6	20150395	-2.41731	1.80589
6	20150415	-2.41731	1.80589
6	17232219	2.41648	1.8049
6	13235343	-2.41496	1.80307
6	14494029	2.41353	1.80138
6	20148765	-2.41181	1.79932
6	16635381	2.41038	1.79762
6	16635409	2.41038	1.79762
6	16635472	2.41038	1.79762
6	16635486	2.41038	1.79762
6	1434486	-2.41035	1.79759
6	15204166	2.40958	1.79667
6	15204224	2.40958	1.79667
6	15204270	2.40958	1.79667
6	1474656	-2.40827	1.79512
6	13235235	-2.40747	1.79416
6	10106222	2.40606	1.79249
6	13261905	-2.40543	1.79174
6	29768670	2.40361	1.78957
6	20151554	-2.40252	1.78827
6	20151294	-2.40234	1.78807
6	6567850	-2.40209	1.78777
6	20148627	-2.40188	1.78752
6	4892296	2.40161	1.78719
6	5916345	-2.40077	1.7862
6	6575575	-2.39921	1.78435
6	29772989	2.39799	1.7829
6	13454343	-2.39729	1.78207
6	22092608	2.39592	1.78045
6	20995019	2.39518	1.77957
6	15203394	2.39489	1.77923
6	10036294	2.39403	1.77821
6	17231398	2.39395	1.77811
6	24622908	2.39381	1.77794
6	10117639	2.3937	1.77782
6	2534672	-2.39367	1.77779
6	17408135	2.39264	1.77656
6	1968633	-2.39258	1.77649
6	17365215	2.39097	1.77459
6	17231460	2.38931	1.77263
6	17231493	2.38931	1.77263
6	17231501	2.38931	1.77263
6	18096007	2.38806	1.77115
6	17231539	2.38672	1.76957
6	1516809	-2.38617	1.76892
6	13538463	-2.38598	1.76869
6	27688257	-2.38552	1.76815
6	6576090	-2.38535	1.76795
6	16869897	-2.38415	1.76654
6	20991835	2.3824	1.76447
6	17234420	2.38097	1.76278
6	17234425	2.38097	1.76278
6	18100480	2.3782	1.75952
6	18100676	2.3782	1.75952
6	4350529	2.3766	1.75763
6	4350548	2.3766	1.75763
6	20151824	-2.37652	1.75754
6	13444095	-2.37542	1.75625
6	1487051	-2.37487	1.7556
6	9148368	2.37365	1.75416
6	13262585	-2.37347	1.75395
6	24597168	2.37326	1.7537
6	22639886	-2.37098	1.75103
6	20994906	2.36978	1.74961
6	20994917	2.36978	1.74961
6	20994930	2.36978	1.74961
6	20994933	2.36978	1.74961
6	20994944	2.36978	1.74961
6	20994980	2.36978	1.74961
6	24675346	2.36931	1.74906
6	15797507	-2.36692	1.74625
6	1892257	2.36687	1.74619
6	17271899	-2.36685	1.74617
6	17232295	2.36638	1.74563
6	19333333	-2.36636	1.7456
6	13239024	-2.36495	1.74395
6	17325511	-2.36403	1.74286
6	19384472	-2.36373	1.74252
6	13454552	-2.36339	1.74212
6	1489855	-2.36259	1.74117
6	13262605	-2.36152	1.73992
6	13258704	-2.36141	1.73979
6	13258728	-2.36141	1.73979
6	13258741	-2.36141	1.73979
6	14492323	2.3592	1.73721
6	1489563	-2.35887	1.73682
6	19839830	-2.3585	1.73639
6	20992276	2.3581	1.73592
6	20992670	2.3581	1.73592
6	20992706	2.3581	1.73592
6	20992743	2.3581	1.73592
6	11681331	2.35803	1.73583
6	17365329	2.35733	1.73502
6	17271772	-2.35716	1.73482
6	11009388	-2.35688	1.7345
6	18103441	2.35659	1.73415
6	13296114	-2.35573	1.73315
6	17233973	2.35423	1.7314
6	20991279	2.35386	1.73096
6	1659647	2.35357	1.73062
6	1657731	2.3509	1.72751
6	17325561	-2.35037	1.72689
6	20995360	2.35034	1.72686
6	20995363	2.35034	1.72686
6	17661220	-2.35019	1.72668
6	14802172	-2.34972	1.72613
6	29756676	2.34811	1.72425
6	20991468	2.34764	1.72371
6	20991490	2.34764	1.72371
6	1493633	-2.34609	1.7219
6	19360659	2.34532	1.721
6	19360817	2.34532	1.721
6	1510781	-2.34496	1.72058
6	1511934	-2.34494	1.72056
6	24650562	2.34479	1.72038
6	1507002	-2.3441	1.71958
6	1422544	-2.34249	1.71771
6	20564069	-2.34231	1.7175
6	1660474	2.34184	1.71695
6	746772	-2.34162	1.7167
6	1658262	2.34152	1.71657
6	6008629	-2.34134	1.71637
6	13454688	-2.34106	1.71604
6	13449900	-2.33925	1.71394
6	13449953	-2.33925	1.71394
6	13449961	-2.33925	1.71394
6	13450573	-2.33925	1.71394
6	1658453	2.33888	1.7135
6	20993856	2.33882	1.71343
6	20993911	2.33882	1.71343
6	11466678	-2.33842	1.71297
6	17232428	2.33791	1.71238
6	13454838	-2.33788	1.71234
6	16546831	2.33759	1.71201
6	16546834	2.33759	1.71201
6	20626885	-2.33734	1.71172
6	19924462	-2.33672	1.711
6	15794516	-2.33646	1.7107
6	1504509	-2.33559	1.70968
6	1496650	-2.33426	1.70814
6	19924176	-2.33393	1.70776
6	5931560	-2.33296	1.70663
6	5931599	-2.3328	1.70645
6	20756876	-2.33207	1.7056
6	17230091	2.33177	1.70525
6	1507641	-2.33118	1.70456
6	12511316	-2.33055	1.70384
6	18105108	2.3273	1.70007
6	10103710	-2.32729	1.70006
6	27586223	-2.32691	1.69963
6	1507461	-2.32642	1.69905
6	21480317	-2.32585	1.69839
6	17233656	2.32442	1.69673
6	5615434	-2.32297	1.69506
6	5615205	-2.3229	1.69498
6	3651153	-2.3228	1.69486
6	13263642	-2.32063	1.69236
6	13263620	-2.32057	1.69229
6	19918716	-2.32042	1.69211
6	5617450	-2.3202	1.69186
6	5617492	-2.3202	1.69186
6	5617495	-2.3202	1.69186
6	5617513	-2.3202	1.69186
6	5617820	-2.3202	1.69186
6	5617831	-2.3202	1.69186
6	5618031	-2.3202	1.69186
6	5618040	-2.3202	1.69186
6	17229802	2.32019	1.69185
6	20558223	-2.31911	1.69061
6	20994987	2.31906	1.69054
6	1504910	-2.31828	1.68964
6	19925726	-2.31723	1.68844
6	19925883	-2.31723	1.68844
6	29535909	2.31723	1.68843
6	5913111	-2.31673	1.68786
6	5931639	-2.31626	1.68732
6	17325334	-2.31592	1.68692
6	17325363	-2.31592	1.68692
6	17230735	2.31455	1.68534
6	17230752	2.31455	1.68534
6	17230786	2.31455	1.68534
6	17231047	2.31441	1.68518
6	15775362	-2.31262	1.68312
6	21709070	2.31188	1.68226
6	25768446	2.31175	1.68212
6	10285674	2.31115	1.68143
6	15647653	-2.31009	1.68021
6	20991326	2.30972	1.67978
6	20991346	2.30972	1.67978
6	17325372	-2.30875	1.67866
6	5220016	-2.30872	1.67863
6	22090121	2.30864	1.67854
6	20812178	-2.30824	1.67808
6	13236698	-2.30718	1.67686
6	13431720	-2.30619	1.67572
6	13258770	-2.30335	1.67245
6	4201364	2.30283	1.67186
6	18095778	2.30275	1.67176
6	18095844	2.30275	1.67176
6	18095867	2.30275	1.67176
6	18095903	2.30275	1.67176
6	19358876	2.3025	1.67147
6	20992953	2.30122	1.67001
6	14492357	2.30012	1.66874
6	2337940	-2.29962	1.66817
6	20992266	2.29893	1.66738
6	14417050	2.29891	1.66736
6	1589746	-2.29869	1.66711
6	1589750	-2.29869	1.66711
6	1589757	-2.29869	1.66711
6	1589824	-2.29869	1.66711
6	1589697	-2.29795	1.66626
6	1589704	-2.29795	1.66626
6	1654365	2.29795	1.66625
6	1488920	-2.2952	1.66311
6	3286293	-2.29493	1.6628
6	24672504	2.29398	1.66171
6	13236881	-2.29336	1.661
6	14488778	2.29303	1.66062
6	20991692	2.29247	1.65998
6	20991726	2.29247	1.65998
6	20991736	2.29247	1.65998
6	20991753	2.29247	1.65998
6	20991589	2.29246	1.65997
6	2324170	-2.29201	1.65945
6	13258662	-2.29161	1.65899
6	25851729	-2.29094	1.65823
6	24632059	2.29056	1.6578
6	18096822	2.29028	1.65747
6	17234590	2.29008	1.65725
6	17234931	2.28971	1.65683
6	20991224	2.28963	1.65673
6	27004117	-2.28915	1.65619
6	24632174	2.28764	1.65446
6	17236021	2.28756	1.65437
6	20995075	2.2861	1.6527
6	5912118	-2.28341	1.64963
6	5912128	-2.28341	1.64963
6	5912366	-2.28322	1.64941
6	5912388	-2.28322	1.64941
6	5613808	-2.28264	1.64875
6	1516932	-2.28246	1.64855
6	868500	-2.28215	1.6482
6	1516825	-2.2817	1.64768
6	10072249	2.28063	1.64646
6	10072251	2.28063	1.64646
6	865275	-2.28057	1.6464
6	6040341	-2.28003	1.64578
6	21214803	-2.28003	1.64578
6	865932	-2.27973	1.64543
6	866158	-2.27973	1.64543
6	13264938	-2.27901	1.64462
6	30279910	-2.27844	1.64397
6	17661708	-2.27792	1.64338
6	17235466	2.27726	1.64262
6	861843	-2.27676	1.64205
6	30279495	-2.27661	1.64189
6	13223158	-2.27603	1.64123
6	13455191	-2.27578	1.64094
6	1514548	-2.27418	1.63912
6	28627426	-2.27284	1.6376
6	19789850	-2.27268	1.63742
6	1661829	2.27193	1.63657
6	1514235	-2.27133	1.63588
6	18105195	2.27114	1.63566
6	17363542	2.27027	1.63468
6	20994243	2.26797	1.63206
6	20994260	2.26797	1.63206
6	1664035	2.26773	1.63179
6	24669127	2.2677	1.63176
6	30281406	-2.26761	1.63165
6	1514679	-2.26758	1.63163
6	5937227	-2.26721	1.6312
6	17231278	2.26702	1.63099
6	17229700	2.26699	1.63095
6	5935638	-2.26588	1.62969
6	19924355	-2.26349	1.62699
6	30276219	-2.26293	1.62636
6	18093677	2.2629	1.62632
6	25410547	-2.26179	1.62506
6	1663253	2.26061	1.62373
6	17771275	-2.25999	1.62303
6	25357058	-2.2599	1.62293
6	24633095	2.25985	1.62287
6	17231680	2.2598	1.62281
6	21295734	-2.25869	1.62155
6	16127679	2.25769	1.62042
6	16707330	2.25759	1.62031
6	16707803	2.25759	1.62031
6	5515678	2.25396	1.61621
6	17661963	-2.25261	1.61469
6	12262757	-2.25228	1.61431
6	5181609	2.25105	1.61293
6	18104806	2.25097	1.61283
6	18104817	2.25097	1.61283
6	19926330	-2.25049	1.61229
6	17359874	2.24964	1.61133
6	10062653	2.24937	1.61103
6	4722216	-2.24908	1.61071
6	17359599	2.24867	1.61024
6	13120625	-2.24851	1.61006
6	19927480	-2.24825	1.60977
6	1564968	-2.2482	1.60972
6	17231205	2.24739	1.6088
6	17231238	2.24739	1.6088
6	17231241	2.24739	1.6088
6	13258437	-2.24719	1.60857
6	1650499	2.24613	1.60738
6	6102840	-2.24596	1.60719
6	16545439	2.24538	1.60653
6	16545464	2.24538	1.60653
6	13236924	-2.2445	1.60555
6	6878740	2.24446	1.6055
6	5908952	-2.24421	1.60522
6	26971209	-2.24381	1.60477
6	5938031	-2.24325	1.60413
6	10074155	2.24324	1.60413
6	17236589	2.24222	1.60298
6	5618088	-2.2422	1.60296
6	5908972	-2.24198	1.6027
6	5908980	-2.24198	1.6027
6	5909014	-2.24198	1.6027
6	13089006	-2.24181	1.60252
6	10558370	2.2415	1.60217
6	13263631	-2.24027	1.60078
6	13258519	-2.23977	1.60023
6	3427349	-2.23972	1.60017
6	1651318	2.23931	1.59971
6	15767771	-2.23705	1.59717
6	19927886	-2.23703	1.59715
6	5857242	-2.23698	1.5971
6	5511097	2.23627	1.5963
6	13454157	-2.23584	1.59581
6	29527301	2.2357	1.59565
6	873112	-2.23495	1.59481
6	24638524	2.23412	1.59388
6	18104564	2.23353	1.59322
6	24638540	2.23304	1.59268
6	13259315	2.23258	1.59216
6	1507804	-2.23033	1.58963
6	17230179	2.2297	1.58893
6	17230191	2.2297	1.58893
6	13453847	-2.2292	1.58837
6	13453861	-2.2292	1.58837
6	19928477	-2.22889	1.58802
6	2690289	-2.22757	1.58655
6	15567117	-2.2254	1.58412
6	21172424	-2.22457	1.5832
6	5908431	-2.22309	1.58153
6	5908476	-2.22309	1.58153
6	5908680	-2.22309	1.58153
6	29087110	-2.22249	1.58086
6	24692063	2.22228	1.58063
6	5913336	-2.2219	1.5802
6	20865372	-2.22167	1.57995
6	14490654	2.2212	1.57943
6	22074153	2.22103	1.57924
6	6756093	-2.22079	1.57897
6	17781557	-2.22031	1.57843
6	19580013	2.21977	1.57783
6	17152733	-2.21862	1.57655
6	10705734	2.2182	1.57608
6	11876620	-2.21814	1.57602
6	2898123	-2.21737	1.57516
6	24214585	-2.21643	1.5741
6	13455824	-2.21585	1.57346
6	17363098	2.21356	1.57091
6	21599643	2.21192	1.56908
6	17771674	-2.21123	1.56832
6	24644332	2.21033	1.56731
6	22104620	2.20957	1.56647
6	22104648	2.20957	1.56647
6	17760429	2.20936	1.56624
6	20151815	-2.20847	1.56525
6	16547244	2.20758	1.56426
6	16547259	2.20758	1.56426
6	16547262	2.20758	1.56426
6	16547287	2.20758	1.56426
6	16567073	-2.20735	1.56401
6	14491681	2.2059	1.56239
6	14491682	2.2059	1.56239
6	14491700	2.2059	1.56239
6	22074950	2.20557	1.56203
6	2235191	-2.20515	1.56156
6	29077801	-2.20438	1.56071
6	14264269	-2.20315	1.55934
6	4920945	2.203	1.55917
6	13982725	2.2011	1.55707
6	21709119	2.20072	1.55664
6	21709120	2.20072	1.55664
6	21709122	2.20072	1.55664
6	21709123	2.20072	1.55664
6	21709145	2.20072	1.55664
6	21709165	2.20072	1.55664
6	21709183	2.20072	1.55664
6	21709205	2.20072	1.55664
6	21709290	2.20072	1.55664
6	21709293	2.20072	1.55664
6	21709326	2.20072	1.55664
6	21709401	2.20072	1.55664
6	21709478	2.20072	1.55664
6	21709497	2.20072	1.55664
6	21709517	2.20072	1.55664
6	21709521	2.20072	1.55664
6	21709530	2.20072	1.55664
6	21709551	2.20072	1.55664
6	21709584	2.20072	1.55664
6	21709586	2.20072	1.55664
6	21709675	2.20072	1.55664
6	21709766	2.20072	1.55664
6	21709814	2.20072	1.55664
6	21709832	2.20072	1.55664
6	21709839	2.20072	1.55664
6	21709840	2.20072	1.55664
6	21709843	2.20072	1.55664
6	21709860	2.20072	1.55664
6	21709990	2.20072	1.55664
6	21710079	2.20072	1.55664
6	21710490	2.20072	1.55664
6	21710506	2.20072	1.55664
6	21710509	2.20072	1.55664
6	21710557	2.20072	1.55664
6	29585524	2.20055	1.55646
6	18094939	2.19972	1.55553
6	18094944	2.19972	1.55553
6	18095481	2.19972	1.55553
6	20568255	-2.19753	1.55312
6	20568306	-2.19753	1.55312
6	17771169	-2.19695	1.55247
6	21703262	2.19653	1.552
6	17759711	2.19621	1.55165
6	5895944	-2.19546	1.55083
6	17341709	2.1953	1.55064
6	17365391	2.19491	1.55022
6	17365404	2.19491	1.55022
6	17236955	2.19369	1.54886
6	10062979	2.19311	1.54822
6	17779924	-2.19266	1.54772
6	1647094	2.19187	1.54686
6	875023	-2.19099	1.54588
6	17358464	2.19082	1.54569
6	17358581	2.19082	1.54569
6	17358604	2.19082	1.54569
6	16999195	-2.19001	1.54479
6	19704665	-2.18938	1.5441
6	21710734	2.18913	1.54382
6	15687994	2.18852	1.54315
6	9342563	-2.187	1.54147
6	13217976	2.18675	1.5412
6	5895417	-2.184	1.53817
6	5512622	2.18121	1.5351
6	17774132	-2.18079	1.53463
6	17774156	-2.18079	1.53463
6	12034942	-2.18047	1.53428
6	19349946	2.18037	1.53417
6	868586	-2.18034	1.53414
6	10066230	2.1796	1.53332
6	24251020	-2.1789	1.53255
6	29831960	-2.17812	1.53169
6	19349978	2.17643	1.52984
6	19349986	2.17643	1.52984
6	17781645	-2.17415	1.52733
6	17781687	-2.17415	1.52733
6	17781689	-2.17415	1.52733
6	17781711	-2.17415	1.52733
6	12939649	-2.17375	1.52689
6	17760222	2.17371	1.52685
6	24578965	2.17253	1.52555
6	2556653	-2.17243	1.52545
6	29837425	-2.17167	1.52461
6	16706744	2.17107	1.52396
6	21979759	2.17088	1.52374
6	21613382	-2.17057	1.5234
6	17716144	-2.1701	1.52289
6	13236667	-2.16983	1.5226
6	868572	-2.16948	1.52221
6	30025614	-2.168	1.52059
6	867587	-2.16754	1.52009
6	868046	-2.1671	1.5196
6	17779548	-2.16709	1.51959
6	20002199	-2.16667	1.51913
6	14493611	2.16528	1.51761
6	5912555	-2.16483	1.51712
6	5912569	-2.16483	1.51712
6	1177067	2.16262	1.5147
6	1959163	2.16224	1.51428
6	29782822	-2.16214	1.51418
6	5857422	-2.1608	1.51271
6	1613741	2.15988	1.51171
6	17363334	2.15875	1.51047
6	17358693	2.15836	1.51004
6	1260348	2.15818	1.50985
6	1260359	2.15818	1.50985
6	17775697	-2.15813	1.50979
6	1608540	2.15795	1.50959
6	16548566	2.15678	1.50832
6	5864439	-2.15638	1.50788
6	16548599	2.15623	1.50771
6	25086560	-2.15327	1.50449
6	1397253	-2.15294	1.50414
6	13644311	-2.15259	1.50375
6	4363674	2.15223	1.50336
6	17760409	2.15206	1.50317
6	1531809	-2.15124	1.50228
6	19345766	2.14989	1.50081
6	19345778	2.14989	1.50081
6	2771396	-2.14963	1.50053
6	19345634	2.14943	1.50031
6	19345640	2.14943	1.50031
6	2577219	-2.14854	1.49934
6	13484444	-2.148	1.49875
6	17779199	-2.14733	1.49803
6	19345620	2.14611	1.4967
6	22642176	-2.14597	1.49655
6	22642239	-2.14597	1.49655
6	877596	-2.14505	1.49555
6	13569066	-2.14469	1.49516
6	22642109	-2.14468	1.49514
6	14762547	-2.14434	1.49478
6	17775212	-2.14409	1.4945
6	17760642	2.14392	1.49431
6	5933499	-2.14391	1.4943
6	25767134	2.14327	1.49361
6	10373585	2.14225	1.49251
6	19997266	-2.14183	1.49204
6	10072084	2.14145	1.49163
6	11973415	-2.14011	1.49018
6	21703217	2.14005	1.49011
6	17235613	2.13981	1.48985
6	25759523	2.13895	1.48892
6	20529537	-2.13888	1.48884
6	15557821	2.13772	1.48758
6	10374698	2.13731	1.48715
6	12930441	-2.13719	1.48702
6	24575726	2.13669	1.48647
6	24576541	2.13669	1.48647
6	10072196	2.1366	1.48637
6	21705505	2.13647	1.48624
6	21705659	2.13647	1.48624
6	21705688	2.13647	1.48624
6	21708839	2.13647	1.48624
6	21708849	2.13647	1.48624
6	21708866	2.13647	1.48624
6	21708939	2.13647	1.48624
6	21708944	2.13647	1.48624
6	21708975	2.13647	1.48624
6	24645813	2.13599	1.48572
6	16640615	2.13522	1.48488
6	20152988	-2.13472	1.48434
6	5880071	-2.13464	1.48425
6	13096542	-2.13425	1.48383
6	13454390	-2.13352	1.48304
6	10558368	-2.13185	1.48123
6	14829472	-2.13173	1.48111
6	10355590	2.13169	1.48106
6	17779633	-2.13123	1.48056
6	17779691	-2.13117	1.4805
6	27169430	-2.13051	1.47979
6	10583877	2.12956	1.47876
6	12233985	2.12932	1.4785
6	16546328	2.12857	1.47769
6	16546329	2.12857	1.47769
6	21478552	2.12619	1.47512
6	5857102	-2.12482	1.47364
6	24378810	-2.1235	1.47222
6	13259352	-2.12203	1.47063
6	13259374	-2.12203	1.47063
6	6214587	-2.12166	1.47023
6	27774217	-2.12079	1.46929
6	5529331	2.12004	1.46849
6	22092414	2.11967	1.46809
6	17359936	2.11854	1.46687
6	11233865	-2.11842	1.46674
6	1406954	-2.11838	1.4667
6	1631305	2.11783	1.46611
6	6014044	-2.11723	1.46547
6	24585035	2.11651	1.46469
6	17988933	-2.11613	1.46428
6	22092635	2.11449	1.46251
6	11913352	-2.11385	1.46183
6	14111708	-2.11371	1.46167
6	16706610	2.11355	1.46151
6	17779544	-2.11311	1.46103
6	24588322	2.11286	1.46076
6	24590278	2.11286	1.46076
6	17236003	2.11191	1.45974
6	13236171	-2.11127	1.45906
6	10366988	2.11126	1.45904
6	1633040	2.11047	1.45819
6	5512121	2.10957	1.45724
6	29702859	2.10755	1.45507
6	17355903	2.10728	1.45477
6	10074108	2.10726	1.45475
6	29841275	-2.10703	1.4545
6	17781938	-2.10678	1.45424
6	17782086	-2.10678	1.45424
6	24214587	-2.10671	1.45416
6	1632003	2.10571	1.45309
6	13088867	-2.10414	1.45141
6	10073751	2.10407	1.45134
6	10073755	2.10407	1.45134
6	24710044	2.10382	1.45107
6	1637636	2.10377	1.45101
6	1637921	2.10377	1.45101
6	22639861	-2.10297	1.45015
6	22639871	-2.10297	1.45015
6	16549047	2.1021	1.44923
6	25116231	-2.10159	1.44868
6	16705286	2.10152	1.44861
6	22655920	-2.10121	1.44827
6	14556835	2.1009	1.44795
6	22656509	-2.10059	1.44761
6	10057221	2.10043	1.44744
6	17359483	2.0999	1.44687
6	1408076	-2.09764	1.44445
6	18102525	2.09741	1.44421
6	21611561	2.09671	1.44346
6	6216130	-2.09648	1.44322
6	27052490	-2.09626	1.44298
6	17777476	-2.09352	1.44006
6	12790247	2.09157	1.43798
6	17357934	2.09145	1.43785
6	18095511	2.09097	1.43734
6	17357874	2.09081	1.43717
6	15888242	-2.09061	1.43695
6	6634378	-2.09039	1.43673
6	5908403	-2.08943	1.4357
6	19579386	2.08867	1.43489
6	1405205	-2.08795	1.43413
6	12392735	2.0877	1.43386
6	21522857	-2.08706	1.43318
6	10343235	2.0866	1.43269
6	2871811	-2.08655	1.43263
6	10075481	2.08576	1.4318
6	10345034	2.08443	1.43038
6	2991009	-2.08325	1.42912
6	21509211	-2.0825	1.42833
6	17662955	-2.08222	1.42803
6	5900009	-2.08129	1.42704
6	5900073	-2.08129	1.42704
6	5900110	-2.08129	1.42704
6	15708020	-2.08079	1.42651
6	10072056	2.08009	1.42577
6	14823739	-2.08004	1.42571
6	17941211	-2.07593	1.42136
6	5899714	-2.0758	1.42121
6	5899849	-2.0758	1.42121
6	12394195	2.07553	1.42093
6	22335141	-2.07506	1.42043
6	22671606	-2.07494	1.42031
6	17919759	-2.07456	1.4199
6	10056246	2.07447	1.4198
6	10062078	2.07204	1.41724
6	15608366	-2.07203	1.41722
6	22671113	-2.07058	1.41569
6	22671303	-2.07058	1.41569
6	15996575	2.06987	1.41494
6	15996415	2.06905	1.41407
6	11927672	-2.06868	1.41368
6	12909743	-2.06824	1.41321
6	20507923	-2.06756	1.4125
6	5951179	-2.06646	1.41134
6	29704973	2.066	1.41085
6	5297560	-2.06495	1.40974
6	17238476	2.06492	1.40971
6	5508645	2.06481	1.40959
6	20645785	-2.06469	1.40947
6	24626332	2.06419	1.40894
6	5306181	-2.06388	1.40861
6	16560729	2.06329	1.40799
6	10019500	2.06308	1.40776
6	1292935	-2.06229	1.40693
6	1292815	-2.06228	1.40692
6	17238526	2.06212	1.40676
6	22672019	-2.06143	1.40602
6	1549723	-2.06012	1.40464
6	1973870	2.0595	1.404
6	20443775	-2.05949	1.40398
6	17215876	-2.05866	1.4031
6	18092323	2.05833	1.40276
6	10056491	2.0576	1.40199
6	10056523	2.0576	1.40199
6	14489290	-2.0571	1.40146
6	21832378	2.05562	1.39991
6	17725634	-2.05509	1.39935
6	22674310	-2.05485	1.3991
6	17249014	-2.05485	1.3991
6	19350602	2.05453	1.39877
6	16703918	2.05319	1.39735
6	16703946	2.05319	1.39735
6	16704288	2.05319	1.39735
6	16704619	2.05319	1.39735
6	16704733	2.05319	1.39735
6	16704797	2.05319	1.39735
6	16704842	2.05319	1.39735
6	22661987	-2.0527	1.39684
6	29697584	2.05255	1.39668
6	17239197	2.05214	1.39625
6	17239028	2.05191	1.39601
6	17915696	-2.05166	1.39574
6	17239800	2.05144	1.39552
6	17239801	2.05144	1.39552
6	17239386	2.05107	1.39513
6	17239074	2.05092	1.39497
6	1342445	-2.05088	1.39493
6	22642418	-2.05081	1.39486
6	22642419	-2.05081	1.39486
6	27775687	-2.04976	1.39374
6	13393843	-2.04971	1.3937
6	12393355	2.04817	1.39208
6	17238660	2.0476	1.39149
6	17238717	2.0476	1.39149
6	16058852	-2.04756	1.39144
6	1626348	2.0467	1.39054
6	13258457	-2.04618	1.38999
6	29698342	2.04616	1.38997
6	29698358	2.04616	1.38997
6	5845381	-2.04523	1.389
6	24716084	2.04502	1.38877
6	24716149	2.04502	1.38877
6	17358253	2.04371	1.3874
6	27058949	-2.0435	1.38719
6	13232170	-2.04295	1.38661
6	13258639	2.04207	1.38569
6	13239528	-2.04197	1.38558
6	10341947	2.04172	1.38532
6	10341949	2.04172	1.38532
6	14003933	-2.04116	1.38473
6	14113831	-2.04008	1.3836
6	11902924	-2.03991	1.38343
6	12392851	2.03833	1.38177
6	10557912	2.03682	1.3802
6	29703030	2.03526	1.37856
6	18094374	2.03406	1.37732
6	21019858	2.03373	1.37697
6	6531110	-2.03291	1.37611
6	15204405	2.03285	1.37605
6	15204433	2.03285	1.37605
6	14119424	-2.03246	1.37565
6	1461892	-2.03237	1.37555
6	14016797	-2.03135	1.37448
6	1975157	2.03126	1.37439
6	16029324	-2.03094	1.37406
6	16640572	2.03071	1.37382
6	29703102	2.03051	1.37361
6	29703598	2.03051	1.37361
6	10074300	2.02974	1.37281
6	13279376	-2.02835	1.37136
6	5957235	-2.02813	1.37113
6	25694863	-2.02795	1.37094
6	3046685	-2.02778	1.37077
6	3097789	-2.02689	1.36984
6	3098033	-2.02689	1.36984
6	29701966	2.02577	1.36868
6	29701970	2.02577	1.36868
6	17919933	-2.02554	1.36843
6	1993760	-2.02512	1.36799
6	2996446	-2.02413	1.36697
6	5315544	-2.02409	1.36692
6	15326251	-2.02319	1.36599
6	16635295	2.02306	1.36586
6	16018203	-2.02145	1.36418
6	10056897	2.02076	1.36347
6	22053432	-2.02067	1.36338
6	2948840	-2.02043	1.36312
6	21037376	-2.02036	1.36305
6	10771775	-2.01953	1.36219
6	18000268	-2.01905	1.36169
6	19804254	-2.01779	1.36038
6	371235	-2.01708	1.35964
6	21702631	2.0152	1.3577
6	21702660	2.0152	1.3577
6	18097702	2.01484	1.35732
6	15620630	2.01462	1.3571
6	20571040	-2.0146	1.35707
6	2093401	2.01301	1.35542
6	2092250	2.01258	1.35498
6	24702601	-2.01229	1.35468
6	2093328	2.01183	1.35421
6	21138028	-2.01162	1.35399
6	20435545	-2.01102	1.35337
6	722278	-2.01081	1.35315
6	22639913	-2.0108	1.35314
6	10558645	-2.01071	1.35304
6	13551440	-2.01063	1.35296
6	21050582	-2.00987	1.35218
6	7015389	2.00962	1.35192
6	15649026	-2.00961	1.35191
6	22089907	2.0085	1.35076
6	17325298	-2.00825	1.3505
6	1407406	-2.00802	1.35027
6	2547213	-2.00778	1.35001
6	22089524	2.00672	1.34892
6	22089564	2.00672	1.34892
6	19940716	-2.00623	1.34842
6	17694467	-2.00609	1.34827
6	29840319	-2.00517	1.34732
6	13241687	-2.00466	1.3468
6	16686170	2.00452	1.34665
6	13217643	-2.00419	1.34631
6	29141349	-2.00391	1.34602
6	27010753	-2.00349	1.34558
6	20190594	-2.00227	1.34433
6	29704713	2.00045	1.34245
6	24721160	-2.00022	1.34221
6	13218783	1.99952	1.34149
6	10372765	1.99899	1.34094
6	10075255	1.99874	1.34069
6	10056325	1.9985	1.34044
6	6853681	-1.99801	1.33994
6	22089589	1.99791	1.33984
6	22089657	1.99791	1.33984
6	15889085	1.99688	1.33878
6	27586872	-1.99671	1.3386
6	29705045	1.99554	1.3374
6	29705372	1.99554	1.3374
6	29706000	1.99554	1.3374
6	27773097	-1.99503	1.33687
6	27087006	-1.99462	1.33645
6	22663483	-1.99458	1.3364
6	22663699	-1.99458	1.3364
6	12043435	1.99382	1.33562
6	12043448	1.99382	1.33562
6	22091766	1.99316	1.33495
6	22091775	1.99316	1.33495
6	22091806	1.99316	1.33495
6	12392527	1.99255	1.33432
6	1560101	-1.99243	1.33419
6	14022480	-1.99222	1.33398
6	17661185	-1.99181	1.33356
6	17661200	-1.99181	1.33356
6	17661204	-1.99181	1.33356
6	22093901	1.99152	1.33326
6	22091911	1.99124	1.33297
6	22091915	1.99124	1.33297
6	22091919	1.99124	1.33297
6	22091926	1.99124	1.33297
6	22091932	1.99124	1.33297
6	22091945	1.99124	1.33297
6	22092088	1.99122	1.33295
6	22092094	1.99122	1.33295
6	22092315	1.9912	1.33293
6	22092324	1.9912	1.33293
6	22092349	1.9912	1.33293
6	22092353	1.9912	1.33293
6	22091862	1.99117	1.3329
6	22091863	1.99117	1.3329
6	22091875	1.99117	1.3329
6	22092546	1.99114	1.33287
6	22092556	1.99114	1.33287
6	22092729	1.99114	1.33287
6	22092776	1.99114	1.33287
6	22092805	1.99114	1.33287
6	22092963	1.99114	1.33287
6	22093007	1.99114	1.33287
6	22093025	1.99114	1.33287
6	22092471	1.99108	1.33281
6	22092481	1.99108	1.33281
6	22092256	1.99104	1.33276
6	22092260	1.99104	1.33276
6	22092381	1.99102	1.33275
6	22092416	1.99099	1.33272
6	10378019	1.99083	1.33255
6	13268325	-1.9907	1.33241
6	5527009	1.99069	1.33241
6	22092662	1.99023	1.33193
6	22092720	1.99023	1.33193
6	20447880	-1.99021	1.33191
6	10377542	1.98936	1.33104
6	17804269	-1.98905	1.33072
6	22076286	1.98845	1.3301
6	2646175	-1.98837	1.33002
6	20953412	-1.98803	1.32968
6	22142913	1.98747	1.3291
6	29697232	1.9872	1.32882
6	28274563	-1.9862	1.3278
6	10055834	1.98554	1.32713
6	22075278	1.98508	1.32665
6	22093769	1.985	1.32657
6	12392297	1.98335	1.32488
6	13456183	-1.98317	1.32469
6	4229015	1.9831	1.32462
6	17358884	1.98309	1.32462
6	17358892	1.98309	1.32462
6	17789041	-1.98308	1.3246
6	5832007	-1.98302	1.32454
6	16925013	-1.98288	1.3244
6	20043149	-1.98279	1.32431
6	20168422	-1.98127	1.32275
6	1460800	-1.98104	1.32251
6	3243349	-1.98058	1.32205
6	29741583	1.98032	1.32178
6	22668917	-1.98024	1.3217
6	22668993	-1.98024	1.3217
6	22669084	-1.98024	1.3217
6	13258033	-1.97964	1.32108
6	16972212	-1.97938	1.32082
6	16285781	-1.97837	1.31978
6	13651996	-1.9753	1.31665
6	5107523	1.97499	1.31633
6	26426642	-1.9749	1.31623
6	14996414	-1.97468	1.31601
6	16643174	-1.97457	1.3159
6	1558436	-1.97453	1.31586
6	24671670	1.97035	1.31159
6	18093936	1.97031	1.31156
6	18093943	1.97031	1.31156
6	22087946	1.96903	1.31025
6	16708179	1.96845	1.30966
6	10343438	1.96842	1.30963
6	10074663	1.96768	1.30888
6	10074883	1.96768	1.30888
6	1343424	-1.96693	1.30812
6	24663011	1.96667	1.30784
6	19357969	1.96621	1.30738
6	22086992	1.96615	1.30732
6	25410859	-1.96415	1.30529
6	11888835	-1.96385	1.30498
6	29739564	1.96319	1.3043
6	29739753	1.96319	1.3043
6	29739976	1.96319	1.3043
6	10769318	-1.96277	1.30388
6	29821307	-1.96224	1.30334
6	22087363	1.9621	1.3032
6	22087501	1.9621	1.3032
6	22087521	1.9621	1.3032
6	5527026	1.96185	1.30295
6	22076516	1.96064	1.30172
6	13279337	-1.95976	1.30082
6	19360602	1.95937	1.30042
6	1412108	-1.9591	1.30016
6	5918554	-1.95881	1.29986
6	28546759	-1.95839	1.29943
6	13642163	-1.95711	1.29813
6	17919781	-1.9571	1.29812
6	20984637	1.95658	1.2976
6	26529115	-1.95656	1.29757
6	17806416	-1.95572	1.29673
6	20439005	-1.9557	1.29671
6	14487737	-1.9542	1.29518
6	13274217	-1.95296	1.29393
6	20216736	-1.95232	1.29328
6	5620368	-1.95196	1.29292
6	22641244	-1.95094	1.29188
6	14545483	1.95009	1.29102
6	14543468	1.94897	1.2899
6	14543676	1.94897	1.2899
6	14546644	1.94811	1.28902
6	14547976	1.94811	1.28902
6	14548115	1.94811	1.28902
6	21718899	1.94796	1.28887
6	5978511	-1.94784	1.28875
6	5900205	-1.9467	1.2876
6	5899995	-1.94665	1.28755
6	20172676	-1.94582	1.28671
6	22089255	1.94567	1.28655
6	5955815	-1.94563	1.28652
6	2213546	-1.94526	1.28614
6	22089112	1.94507	1.28595
6	17662475	-1.94471	1.28559
6	14493366	1.94462	1.2855
6	17937151	-1.9443	1.28518
6	5899873	-1.94418	1.28506
6	17805554	-1.94375	1.28462
6	1606487	1.94333	1.28419
6	17805269	-1.94321	1.28408
6	17805710	-1.94303	1.28389
6	5900407	-1.94294	1.2838
6	5900413	-1.94294	1.2838
6	13393404	-1.94292	1.28378
6	24641646	1.9425	1.28336
6	22089363	1.9421	1.28295
6	2338101	-1.94204	1.28289
6	5181638	1.94166	1.28251
6	4217155	1.94127	1.28212
6	29742116	1.9409	1.28175
6	12474646	1.93897	1.2798
6	13086847	-1.93872	1.27955
6	25857969	-1.93858	1.27941
6	29836347	-1.93693	1.27775
6	13392992	-1.93622	1.27703
6	13392993	-1.93622	1.27703
6	13399608	-1.93621	1.27702
6	17905630	-1.9362	1.27701
6	17802836	-1.93602	1.27683
6	17802928	-1.93602	1.27683
6	15888694	-1.93593	1.27674
6	13223427	-1.93572	1.27653
6	13241729	-1.93571	1.27652
6	19666620	-1.93562	1.27643
6	29749524	1.93554	1.27635
6	1437386	-1.93484	1.27565
6	5618207	-1.93479	1.27559
6	5900357	-1.93435	1.27515
6	12942470	1.93415	1.27495
6	29780137	1.93387	1.27466
6	5618113	-1.93371	1.27451
6	5618137	-1.93371	1.27451
6	25915004	-1.93363	1.27443
6	22114464	1.93302	1.27381
6	17814333	-1.93223	1.27301
6	29780733	1.93193	1.27272
6	29780739	1.93193	1.27272
6	1386579	-1.93094	1.27172
6	24650802	-1.93079	1.27157
6	1344522	-1.9306	1.27139
6	1344555	-1.9305	1.27128
6	29779608	1.9304	1.27118
6	29779677	1.9304	1.27118
6	29748399	1.93001	1.27079
6	29749169	1.93001	1.27079
6	4759053	1.92961	1.27039
6	15695678	-1.92939	1.27017
6	13454588	1.92933	1.27011
6	1606079	1.9292	1.26998
6	1606181	1.9292	1.26998
6	5899658	-1.9283	1.26908
6	5899674	-1.9283	1.26908
6	5899683	-1.9283	1.26908
6	20645756	-1.92765	1.26842
6	20774395	-1.92705	1.26782
6	5918920	-1.92661	1.26738
6	20984311	1.92657	1.26734
6	20984323	1.92657	1.26734
6	20984342	1.92657	1.26734
6	20984347	1.92657	1.26734
6	20984375	1.92657	1.26734
6	13281154	-1.92626	1.26703
6	2544191	-1.92625	1.26702
6	20627792	-1.92625	1.26702
6	13281480	-1.92582	1.26659
6	13281078	-1.92577	1.26654
6	1462013	-1.92575	1.26652
6	13281242	-1.92537	1.26613
6	25685813	-1.9252	1.26597
6	14552494	1.92515	1.26592
6	2642690	-1.92511	1.26587
6	5620641	-1.92465	1.26542
6	17746639	-1.92442	1.26519
6	22081422	1.92353	1.26429
6	22081441	1.92327	1.26403
6	22081443	1.92327	1.26403
6	22000322	1.92282	1.26358
6	13282003	-1.92138	1.26214
6	20180037	-1.9213	1.26206
6	28979607	-1.92096	1.26172
6	22086937	1.92041	1.26117
6	17746469	-1.92032	1.26108
6	22640303	-1.92028	1.26104
6	22640320	-1.92028	1.26104
6	11691464	1.92006	1.26083
6	26429130	-1.91925	1.26001
6	5908758	-1.91895	1.25971
6	19360326	1.91872	1.25948
6	19358551	1.9187	1.25946
6	10705769	-1.91847	1.25923
6	24562337	1.91843	1.25919
6	17313625	-1.91804	1.2588
6	15984922	1.91794	1.2587
6	13280987	-1.91747	1.25824
6	13281019	-1.91747	1.25824
6	1260477	1.91722	1.25799
6	12922043	-1.91701	1.25777
6	13280850	-1.91697	1.25773
6	13280912	-1.91697	1.25773
6	1914577	1.91666	1.25742
6	18094548	1.91615	1.25692
6	18094391	1.91612	1.25688
6	13278388	-1.91582	1.25659
6	13278435	-1.91582	1.25659
6	10016143	1.91581	1.25657
6	10016165	1.91581	1.25657
6	13375010	-1.91528	1.25605
6	17746559	-1.915	1.25577
6	25386495	-1.91447	1.25524
6	26331878	-1.91417	1.25494
6	22076431	1.91399	1.25476
6	4852636	1.91398	1.25475
6	13232412	-1.91374	1.25451
6	13278779	-1.91361	1.25438
6	20571567	-1.9135	1.25427
6	20646126	-1.91335	1.25412
6	10140855	1.91332	1.25409
6	22640490	-1.91332	1.25409
6	5516562	1.91264	1.25341
6	17801365	-1.9124	1.25318
6	1293011	-1.91185	1.25263
6	17358310	1.91185	1.25263
6	19963631	-1.91147	1.25225
6	24568140	1.91145	1.25223
6	1893919	-1.91143	1.2522
6	16320346	-1.91131	1.25208
6	13066007	1.91061	1.25139
6	17819524	-1.91058	1.25136
6	17819537	-1.91058	1.25136
6	13282780	-1.90954	1.25033
6	19956493	-1.90954	1.25032
6	17801962	-1.90922	1.25
6	17801977	-1.90922	1.25
6	25458068	-1.90914	1.24992
6	17909905	-1.90873	1.24952
6	17790138	-1.90626	1.24705
6	29788199	1.90579	1.24659
6	5908959	-1.90537	1.24618
6	14441605	1.90487	1.24568
6	1091778	1.90411	1.24492
6	20573208	-1.90402	1.24483
6	20573383	-1.904	1.24481
6	20573087	-1.90396	1.24477
6	2653062	-1.90379	1.2446
6	10753088	-1.90311	1.24392
6	22106392	1.90273	1.24355
6	22106452	1.90273	1.24355
6	19206019	-1.90271	1.24353
6	13275028	-1.90252	1.24334
6	20572872	-1.90251	1.24333
6	24693222	-1.90239	1.24321
6	5620118	-1.9022	1.24303
6	5620128	-1.9022	1.24303
6	5620135	-1.9022	1.24303
6	5957028	-1.90146	1.24228
6	13270262	-1.90073	1.24156
6	29829366	-1.90046	1.24129
6	5921795	-1.89974	1.24057
6	1372971	-1.89972	1.24056
6	5921849	-1.89958	1.24042
6	17233259	1.89925	1.24009
6	13280831	-1.8991	1.23994
6	1417863	-1.899	1.23984
6	16706880	1.89851	1.23936
6	13238980	-1.89784	1.2387
6	5920196	-1.89681	1.23767
6	5919741	-1.8963	1.23717
6	25979950	-1.89573	1.2366
6	1414819	-1.89557	1.23644
6	17356118	1.89493	1.23582
6	20574226	-1.89483	1.23571
6	20575079	-1.89475	1.23563
6	20574088	-1.89474	1.23563
6	19418461	-1.89447	1.23535
6	16998752	-1.89434	1.23523
6	20574314	-1.89409	1.23498
6	20574383	-1.89409	1.23498
6	20574516	-1.89409	1.23498
6	13277282	-1.89406	1.23495
6	16864639	-1.89391	1.2348
6	17792507	-1.89304	1.23394
6	8770567	-1.8924	1.2333
6	1915775	1.89225	1.23316
6	24706546	-1.89215	1.23306
6	1412042	-1.89176	1.23267
6	1342385	-1.89113	1.23205
6	1342305	-1.89109	1.23202
6	16548147	1.89064	1.23156
6	16548172	1.89064	1.23156
6	1460690	-1.8904	1.23133
6	16547883	1.89031	1.23124
6	20984505	1.8899	1.23083
6	19944561	-1.88969	1.23063
6	5620464	-1.88919	1.23013
6	5620470	-1.88919	1.23013
6	5620562	-1.88919	1.23013
6	5620570	-1.88919	1.23013
6	20975269	1.88899	1.22993
6	29784597	1.88875	1.2297
6	29784598	1.88875	1.2297
6	29784844	1.88875	1.2297
6	27772267	-1.8884	1.22935
6	17910016	-1.8872	1.22817
6	17910030	-1.8872	1.22817
6	24642134	1.88674	1.22771
6	14548483	1.88614	1.22712
6	14548489	1.88614	1.22712
6	14548492	1.88614	1.22712
6	14548812	1.88614	1.22712
6	29784132	1.88597	1.22696
6	13274152	-1.8859	1.22688
6	13274178	-1.8859	1.22688
6	22074526	1.88589	1.22688
6	22074142	1.88584	1.22683
6	5618538	-1.88526	1.22625
6	14845054	-1.88458	1.22559
6	22640152	-1.88413	1.22514
6	22640177	-1.88413	1.22514
6	20574013	-1.88379	1.2248
6	15206733	1.88322	1.22424
6	16137956	-1.88303	1.22405
6	24641963	1.88273	1.22376
6	29783753	1.88215	1.22319
6	29784089	1.88215	1.22319
6	29784100	1.88215	1.22319
6	17794244	-1.88182	1.22286
6	17794264	-1.88182	1.22286
6	1607061	1.88177	1.22281
6	14995791	-1.88161	1.22265
6	29750283	1.88119	1.22224
6	29786842	1.88061	1.22167
6	29786867	1.88061	1.22167
6	839462	-1.87971	1.22078
6	13273359	-1.87962	1.22069
6	29785541	1.87961	1.22069
6	29785584	1.87961	1.22069
6	29785624	1.87961	1.22069
6	29785650	1.87961	1.22069
6	20984617	1.87939	1.22046
6	20984622	1.87939	1.22046
6	5620380	-1.87938	1.22046
6	12045391	1.87927	1.22035
6	17789099	-1.87901	1.22009
6	29781004	1.87888	1.21996
6	25889623	-1.87867	1.21976
6	17365969	1.87854	1.21963
6	20984562	1.87777	1.21887
6	22074556	1.87676	1.21788
6	24641441	1.87642	1.21754
6	24563311	1.87629	1.21741
6	24565091	1.87629	1.21741
6	29785060	1.87612	1.21725
6	29785235	1.87612	1.21725
6	29785253	1.87612	1.21725
6	29785397	1.87612	1.21725
6	17979428	-1.87564	1.21677
6	17979507	-1.87553	1.21667
6	16138125	-1.87521	1.21636
6	29783483	1.87367	1.21484
6	17980013	-1.87203	1.21323
6	12209952	1.8708	1.21202
6	12946178	1.86972	1.21097
6	17975422	-1.86902	1.21028
6	29782966	1.86866	1.20992
6	17236408	1.86846	1.20973
6	4225726	1.86787	1.20915
6	11114564	-1.86727	1.20856
6	15649482	-1.86706	1.20835
6	5523750	1.86657	1.20788
6	1437523	-1.86618	1.20749
6	27771142	-1.86509	1.20642
6	12943678	1.86468	1.20602
6	29781081	1.86411	1.20547
6	29781686	1.86411	1.20547
6	29782078	1.86411	1.20547
6	29782327	1.86411	1.20547
6	29782336	1.86411	1.20547
6	29782339	1.86411	1.20547
6	29782350	1.86411	1.20547
6	29782378	1.86411	1.20547
6	29782423	1.86411	1.20547
6	29782619	1.86411	1.20547
6	29782620	1.86411	1.20547
6	29782667	1.86411	1.20547
6	17731081	-1.86361	1.20498
6	13194328	-1.86275	1.20414
6	16548417	1.8616	1.20302
6	16548558	1.8616	1.20302
6	14400959	1.86152	1.20294
6	6182900	-1.8613	1.20272
6	13953028	-1.86038	1.20182
6	22078463	1.86031	1.20175
6	19377987	1.86019	1.20164
6	26426150	-1.85957	1.20103
6	16548635	1.85883	1.20031
6	17795913	-1.85854	1.20002
6	24688740	-1.85836	1.19985
6	24688749	-1.85836	1.19985
6	11913593	-1.85834	1.19983
6	1426810	-1.85827	1.19976
6	26946568	-1.85816	1.19965
6	19319767	-1.8578	1.1993
6	13069976	1.85766	1.19916
6	14013283	-1.85757	1.19907
6	13263923	-1.85693	1.19845
6	17783472	-1.85689	1.19841
6	29751836	1.85666	1.19819
6	27774986	-1.85626	1.19779
6	17215413	-1.85583	1.19737
6	19378080	1.85502	1.19659
6	13237635	-1.85447	1.19605
6	1417117	-1.85368	1.19528
6	17910280	-1.85313	1.19475
6	17915736	-1.85166	1.19332
6	17910451	-1.85142	1.19308
6	17909757	-1.85127	1.19293
6	20149514	-1.85121	1.19287
6	15206033	1.85095	1.19263
6	17788892	-1.85093	1.1926
6	17147066	-1.85076	1.19243
6	22000373	1.84992	1.19162
6	22102149	1.84891	1.19064
[truncated: 31,857 more rows]

## Sheet: Table S7
Supplementary Table S7 : Tropical japonica accessions groups for TreeMix analysis
GJ-trop_AS4	:	IRIS_313-11248	IRIS_313-11611	IRIS_313-10336	CX106	IRIS_313-9558	IRIS_313-12285	IRIS_313-8955	IRIS_313-11328	IRIS_313-12006	IRIS_313-8894	IRIS_313-10704	IRIS_313-9375	IRIS_313-9050	IRIS_313-8626	IRIS_313-10703	IRIS_313-11329	IRIS_313-9568	IRIS_313-8439	IRIS_313-11046	IRIS_313-12108	IRIS_313-11045	IRIS_313-8279	IRIS_313-12070	IRIS_313-11044	IRIS_313-8381
GJ-trop_AS5	:	IRIS_313-10581	IRIS_313-8314	IRIS_313-9423	IRIS_313-11117	IRIS_313-11003	IRIS_313-10745	IRIS_313-10920	IRIS_313-10919	IRIS_313-9928	IRIS_313-10803	IRIS_313-10956	IRIS_313-11424	IRIS_313-8594	IRIS_313-10152	IRIS_313-10991	IRIS_313-12241	IRIS_313-10950	IRIS_313-10773	IRIS_313-11380	IRIS_313-10776	IRIS_313-10957	IRIS_313-10746	IRIS_313-10796	IRIS_313-10580	B025	IRIS_313-11532	IRIS_313-10788	IRIS_313-11397	IRIS_313-10784	IRIS_313-10808	IRIS_313-10945	IRIS_313-10759	IRIS_313-10785	IRIS_313-10829	IRIS_313-11498	IRIS_313-10781	IRIS_313-10936	IRIS_313-9301	IRIS_313-9129	IRIS_313-10689	IRIS_313-10830	IRIS_313-10952	IRIS_313-9239	IRIS_313-10741	IRIS_313-10780	IRIS_313-11496	IRIS_313-10809	IRIS_313-10958
GJ-trop_AS6	:	B196	IRIS_313-10507	CX367	CX359	CX355	IRIS_313-10196	CX352	CX285
GJ-trop_AS7	:	IRIS_313-10076	IRIS_313-9789	IRIS_313-10075	IRIS_313-8400	IRIS_313-10071	IRIS_313-10065	IRIS_313-9995	IRIS_313-10082	IRIS_313-10079	IRIS_313-10067	IRIS_313-10074	IRIS_313-10073	IRIS_313-10094	IRIS_313-10080	IRIS_313-10078	IRIS_313-9800	CX129
GJ-trop_Mada	:	IRIS_313-10051	IRIS_313-10041	IRIS_313-9745	IRIS_313-7993	IRIS_313-10099	IRIS_313-11792	IRIS_313-12279	IRIS_313-7959	IRIS_313-7992	IRIS_313-11790	IRIS_313-9742	IRIS_313-12281	IRIS_313-7994	IRIS_313-11756	IRIS_313-7850
GJ-trop_Nerica	:	CX371	CX372	CX373	CX374
GJ-trop_Afs	:	B188	B190	CX220	IRIS_313-7838	IRIS_313-7912	IRIS_313-7914	IRIS_313-8523	IRIS_313-8687	IRIS_313-8768	IRIS_313-8769	IRIS_313-9297	IRIS_313-10541	IRIS_313-10711	IRIS_313-10730	IRIS_313-11100	IRIS_313-11102	IRIS_313-11106	IRIS_313-11107	IRIS_313-11159	IRIS_313-11161	IRIS_313-11435	IRIS_313-11436	IRIS_313-11527	IRIS_313-11659	IRIS_313-11660	IRIS_313-11739	IRIS_313-11915	IRIS_313-11946	IRIS_313-12021	IRIS_313-15905
GJ-trop_Afi	:	B189	IRIS_313-8277	IRIS_313-10712	IRIS_313-11103	IRIS_313-11104	IRIS_313-11105	IRIS_313-11109	IRIS_313-11121	IRIS_313-11376	IRIS_313-11524	IRIS_313-11526	IRIS_313-11540	IRIS_313-11658	IRIS_313-11755	IRIS_313-11759	IRIS_313-12018
[truncated: 123 more columns]

## Sheet: Table S8
Supplementary Table S8 : Results of Patterson's D, fd and fdM statistic using ABBA-BABA tests on chromosome 6
scaffold	start	end	mid	sites	sitesUsed	ABBA	BABA	D	fd	fdM
6	1601	1700	1639	25	4	0	0.0002	-1	0	-0.0096
6	1651	1750	1696	19	4	0	0.0002	-1	0	-0.1068
6	32201	32300	32269	16	8	0	0	-1	0	-0.0478
6	32251	32350	32304	23	14	0	0.0001	-1	0	-0.0618
6	32301	32400	32356	31	12	0	0	-1	0	-0.0637
6	32651	32750	32695	31	14	0	0.0001	-1	0	-0.0347
6	32701	32800	32730	15	7	0	0.0001	-1	0	-0.0377
6	56001	56100	56065	19	4	0.0002	0	1	0.2312	0.2312
6	56051	56150	56092	23	6	0.0002	0	1	0.299	0.2938
6	83801	83900	83865	17	10	0.0004	0	0.8412	0.0193	0.0192
6	83851	83950	83893	22	11	0.0004	0	0.8412	0.0407	0.0404
6	84101	84200	84190	8	7	0	0.0002	-1	0	-0.0015
6	84151	84250	84212	24	19	0	0.0022	-1	0	-0.0164
6	84201	84300	84240	22	15	0	0.002	-1	0	-0.4817
6	84501	84600	84570	15	12	0	0.0001	-1	0	-0.0199
6	84551	84650	84594	21	14	0	0.0001	-1	0	-0.2425
6	84601	84700	84635	11	4	0	0	-1	0	-0.2908
6	87101	87200	87147	24	8	0	0	-1	0	-0.0135
6	87151	87250	87171	11	3	0	0	-1	0	-0.1195
6	123551	123650	123592	5	1	0	0.0009	-1	1.1089	-0.0982
6	123601	123700	123634	3	2	0	0.0009	-1	1.14	-0.098
6	127051	127150	127112	6	3	0	0.0016	-1	0	-0.0274
6	127101	127200	127158	6	3	0	0.0283	-1	0	-0.2396
6	127151	127250	127207	6	2	0	0.0267	-1	0	-0.4478
6	127501	127600	127566	9	2	0	0.0005	-1	0	-0.0106
6	127551	127650	127589	8	2	0	0.0005	-1	0	-0.0106
6	128151	128250	128205	19	3	0	0.0005	-1	0	-0.0046
6	128201	128300	128243	15	5	0	0.0005	-1	0	-0.0043
6	129151	129250	129215	9	2	0	0.0005	-1	0	-0.0091
6	129201	129300	129249	20	4	0	0.0011	-1	0	-0.0091
6	129251	129350	129272	13	3	0	0.0005	-1	0	-0.009
6	129701	129800	129751	10	3	0	0.0012	-1	0	-0.0081
6	129751	129850	129792	11	2	0	0.0012	-1	0	-0.0082
6	130001	130100	130050	13	5	0	0.0005	-1	0	-0.0092
6	130051	130150	130103	17	7	0	0.0011	-1	0	-0.0083
6	130101	130200	130140	16	5	0	0.0005	-1	0	-0.0076
6	130151	130250	130195	12	3	0	0.0005	-1	0	-0.0092
6	130201	130300	130250	11	2	0	0.0011	-1	0	-0.0092
6	130251	130350	130298	9	1	0	0.0005	-1	0	-0.0092
6	130301	130400	130342	7	1	0	0.0005	-1	0	-0.0092
6	130351	130450	130402	6	2	0	0.0005	-1	0	-0.0081
6	130751	130850	130793	7	2	0	0.0005	-1	0	-0.0079
6	130801	130900	130832	4	2	0	0.0005	-1	0	-0.0079
6	133151	133250	133220	5	1	0	0.0231	-1	0	-0.4143
6	133201	133300	133220	5	1	0	0.0231	-1	0	-0.4143
6	150601	150700	150665	9	2	0	0.0005	-1	0	-0.0079
6	150651	150750	150687	12	3	0	0.0005	-1	0	-0.009
6	153501	153600	153589	1	1	0	0.0005	-1	0	-0.0094
6	153551	153650	153589	1	1	0	0.0005	-1	0	-0.0094
6	153851	153950	153924	2	1	0	0.0005	-1	0	-0.0091
6	153901	154000	153924	2	1	0	0.0005	-1	0	-0.0091
6	160651	160750	160675	5	2	0	0	-1	11.2727	-0.4556
6	160701	160800	160768	5	2	0	0	-1	0	-0.4905
6	161001	161100	161043	13	2	0	0.0005	-1	0	-0.008
6	161051	161150	161092	10	2	0	0.0005	-1	0	-0.0092
6	161551	161650	161591	7	3	0	0	-1	0	-0.1712
6	161601	161700	161613	4	3	0	0	-1	0	-0.1712
6	161951	162050	162021	4	1	0	0.0005	-1	0	-0.0095
6	162001	162100	162044	6	1	0	0.0005	-1	0	-0.0095
6	162801	162900	162867	11	2	0	0.0223	-1	0	-0.3595
6	162851	162950	162891	11	2	0	0.0223	-1	0	-0.3595
6	164751	164850	164797	11	8	0	0.0005	-1	0	-0.0092
6	164801	164900	164833	7	4	0	0.0005	-1	0	-0.0092
6	165751	165850	165809	9	4	0	0.0001	-1	0	-0.0012
6	165801	165900	165845	9	3	0	0.0001	-1	0	-0.0012
6	166851	166950	166905	15	4	0	0.0005	-1	0	-0.0049
6	166901	167000	166943	13	3	0	0.0005	-1	0	-0.0086
6	168551	168650	168631	1	1	0	0.0005	-1	0	-0.0099
6	168601	168700	168651	2	1	0	0.0005	-1	0	-0.0099
6	170451	170550	170532	1	1	0	0.0005	-1	0	-0.0093
6	170501	170600	170566	2	2	0	0.0005	-1	0	-0.008
6	176851	176950	176924	5	1	0	0.0005	-1	0	-0.0091
6	176901	177000	176939	5	1	0	0.0005	-1	0	-0.0091
6	177151	177250	177212	5	1	0	0.0005	-1	0	-0.0092
6	177201	177300	177253	6	2	0	0.0005	-1	0	-0.0091
6	177501	177600	177574	9	4	0	0.0017	-1	1.2391	-0.0556
6	177551	177650	177590	11	4	0	0.0017	-1	1.2391	-0.0556
6	177801	177900	177852	11	2	0	0.0005	-1	0	-0.0096
6	177851	177950	177873	7	2	0	0.0005	-1	0	-0.0096
6	177901	178000	177964	4	1	0	0.0005	-1	0	-0.0092
6	177951	178050	178001	6	2	0	0.0005	-1	0	-0.0078
6	179951	180050	180006	12	4	0	0.0004	-1	0	-0.0119
6	180001	180100	180046	15	8	0	0.0008	-1	0	-0.011
6	180051	180150	180104	15	5	0	0.0005	-1	0	-0.0103
6	180501	180600	180555	18	4	0	0.0003	-1	0	-0.0142
6	180551	180650	180602	22	11	0	0.0009	-1	0	-0.0164
6	180601	180700	180641	19	12	0	0.0006	-1	0	-0.0158
6	180801	180900	180850	6	2	0	0.0005	-1	0	-0.0094
6	180851	180950	180912	17	8	0	0.0005	-1	0	-0.0045
6	180901	181000	180950	25	9	0	0.0003	-1	0	-0.0034
6	180951	181050	181003	27	7	0	0.002	-1	0	-0.0134
6	181001	181100	181042	23	5	0	0.0017	-1	0	-0.0123
6	181051	181150	181112	23	6	0	0.0001	-1	0	-0.0017
6	181101	181200	181149	23	7	0	0.0002	-1	0	-0.0036
6	181151	181250	181200	14	3	0	0.0001	-1	0	-0.0148
6	181451	181550	181499	11	7	0	0.0003	-1	0	-0.0027
6	181501	181600	181548	12	5	0	0.0003	-1	0	-0.0022
6	181551	181650	181605	14	8	0	0.0003	-1	0	-0.0013
6	181601	181700	181649	16	7	0	0.0003	-1	0	-0.0017
6	181801	181900	181845	11	4	0	0.0021	-1	0	-0.0284
6	181851	181950	181894	6	3	0	0.0026	-1	0	-0.0213
6	181901	182000	181944	3	1	0	0.0005	-1	0	-0.0096
6	182751	182850	182822	2	1	0	0.0049	-1	0	-0.2336
6	182801	182900	182822	2	1	0	0.0049	-1	0	-0.2336
6	187351	187450	187403	17	4	0	0.0005	-1	0	-0.0092
6	187401	187500	187441	13	7	0	0.0005	-1	0	-0.0092
6	189001	189100	189050	4	1	0	0.0005	-1	0	-0.0096
6	189051	189150	189126	3	2	0	0.0005	-1	0	-0.0047
6	189351	189450	189388	4	1	0	0.0005	-1	0	-0.0092
6	189401	189500	189462	4	1	0	0.0005	-1	0	-0.0092
6	190451	190550	190482	4	1	0	0.0005	-1	0	-0.0092
6	190501	190600	190543	1	1	0	0.0005	-1	0	-0.0092
6	200951	201050	200986	8	1	0	0.0005	-1	0	-0.0092
6	201001	201100	201013	2	1	0	0.0005	-1	0	-0.0092
6	207401	207500	207450	2	1	0	0.0005	-1	0	-0.0091
6	207451	207550	207514	2	1	0	0.0005	-1	0	-0.0091
6	209701	209800	209770	4	2	0	0.0005	-1	0	-0.0092
6	209751	209850	209799	3	1	0	0.0005	-1	0	-0.0092
6	214501	214600	214554	1	1	0	0.0005	-1	0	-0.0104
6	214551	214650	214554	1	1	0	0.0005	-1	0	-0.0104
6	216901	217000	216944	3	1	0	0.0006	-1	0	-0.0088
6	216951	217050	217010	3	1	0	0.0006	-1	0	-0.0088
6	219001	219100	219047	3	2	0	0.0007	-1	0	-0.0073
6	219051	219150	219076	1	1	0	0.0007	-1	0	-0.0073
6	219401	219500	219443	4	2	0	0.0007	-1	0	-0.0073
6	219451	219550	219455	1	1	0	0.0007	-1	0	-0.0073
6	221951	222050	222005	10	3	0	0.0007	-1	0	-0.0066
6	222001	222100	222058	12	5	0	0.0007	-1	0	-0.0054
6	223901	224000	223954	11	3	0	0.0321	-1	0	-0.1223
6	223951	224050	223987	13	2	0	0.0328	-1	0	-0.1799
6	224001	224100	224018	7	2	0	0.0007	-1	0	-0.0073
6	224751	224850	224802	9	3	0	0.0007	-1	0	-0.0064
6	224801	224900	224838	7	3	0	0.0007	-1	0	-0.006
6	224851	224950	224919	6	4	0	0.0007	-1	0	-0.0035
6	224901	225000	224957	7	3	0	0.0007	-1	0	-0.0037
6	227051	227150	227107	14	2	0	0.0191	-1	0	-0.3971
6	227101	227200	227150	25	4	0	0.0191	-1	0	-0.4027
6	227151	227250	227184	19	4	0	0.0007	-1	0	-0.0065
6	227201	227300	227263	13	3	0	0.0007	-1	0	-0.0066
6	227251	227350	227303	20	4	0	0.0297	-1	0	-0.1596
6	227301	227400	227335	14	2	0	0.0297	-1	0	-0.1668
6	231651	231750	231721	1	1	0	0.0007	-1	0	-0.0074
6	231701	231800	231760	3	2	0	0.0007	-1	0	-0.0074
6	233351	233450	233388	7	2	0	0.0004	-1	0	-0.009
6	233401	233500	233446	4	1	0	0.0004	-1	0	-0.0116
6	235501	235600	235539	11	1	0	0.0007	-1	0	-0.0075
6	235551	235650	235601	10	1	0	0.0007	-1	0	-0.0075
6	237001	237100	237048	4	1	0	0.0007	-1	0	-0.0073
6	237051	237150	237063	3	1	0	0.0007	-1	0	-0.0073
6	238101	238200	238146	5	1	0	0.0007	-1	0	-0.0075
6	238151	238250	238178	3	1	0	0.0007	-1	0	-0.0075
6	240801	240900	240856	10	1	0	0.0007	-1	0	-0.0073
6	240851	240950	240872	7	1	0	0.0007	-1	0	-0.0073
6	241651	241750	241700	4	2	0	0.0007	-1	0	-0.0073
6	241701	241800	241764	9	2	0	0.0007	-1	0	-0.0073
6	242051	242150	242122	4	1	0	0.0007	-1	0	-0.0074
6	242101	242200	242151	5	2	0	0.0007	-1	0	-0.0074
6	243051	243150	243118	4	1	0	0.0007	-1	0	-0.0075
6	243101	243200	243156	7	3	0	0.0007	-1	0	-0.0071
6	243801	243900	243858	11	5	0	0.0007	-1	0	-0.0073
6	243851	243950	243883	9	5	0	0.0007	-1	0	-0.0073
6	249401	249500	249450	11	4	0	0.0103	-1	0	-0.0733
6	249451	249550	249495	10	2	0	0.0103	-1	0	-0.2117
6	263951	264050	264008	9	2	0	0.0306	-1	0	-0.3129
6	264001	264100	264049	12	5	0	0.0306	-1	0	-0.2813
6	264101	264200	264164	11	4	0	0.0007	-1	0	-0.006
6	264151	264250	264198	15	4	0	0.0007	-1	0	-0.0066
6	266751	266850	266814	5	1	0	0.0007	-1	0	-0.0073
6	266801	266900	266824	4	1	0	0.0007	-1	0	-0.0073
6	267551	267650	267594	4	1	0	0.0007	-1	0	-0.0074
6	267601	267700	267637	4	1	0	0.0007	-1	0	-0.0074
6	267651	267750	267696	5	2	0	0.0006	-1	0	-0.0076
6	267701	267800	267745	7	2	0	0.0006	-1	0	-0.0076
6	270851	270950	270885	2	1	0	0.0007	-1	0	-0.007
6	270901	271000	270938	2	1	0	0.0007	-1	0	-0.007
6	271451	271550	271500	4	2	0	0.001	-1	0	-0.0048
6	271501	271600	271546	3	2	0	0.001	-1	0	-0.0048
6	272301	272400	272365	6	1	0	0.0007	-1	0	-0.0071
6	272351	272450	272396	10	2	0	0.0007	-1	0	-0.0035
6	276951	277050	276998	5	2	0	0.0004	-1	0	-0.0097
6	277001	277100	277064	4	1	0	0.0004	-1	0	-0.0128
6	278001	278100	278052	4	1	0	0.0004	-1	0	-0.0114
6	278051	278150	278084	2	1	0	0.0004	-1	0	-0.0114
6	283101	283200	283138	6	1	0	0.0007	-1	0	-0.0073
6	283151	283250	283154	2	1	0	0.0007	-1	0	-0.0073
6	283801	283900	283875	4	1	0	0.0007	-1	0	-0.0074
6	283851	283950	283900	9	1	0	0.0007	-1	0	-0.0074
6	286401	286500	286446	7	1	0	0.0007	-1	0	-0.0073
6	286451	286550	286491	6	1	0	0.0007	-1	0	-0.0073
6	290901	291000	290930	6	1	0	0.0005	-1	0	-0.0095
6	290951	291050	291020	3	3	0	0.001	-1	0	-0.0095
6	291001	291100	291068	6	2	0	0.0005	-1	0	-0.0095
6	291801	291900	291846	7	1	0	0.0005	-1	0	-0.0097
6	291851	291950	291908	11	3	0	0.0015	-1	0	-0.0096
6	291901	292000	291940	8	2	0	0.001	-1	0	-0.0095
6	295751	295850	295822	9	1	0	0.0007	-1	0	-0.0075
6	295801	295900	295837	10	1	0	0.0007	-1	0	-0.0075
6	297651	297750	297731	3	1	0	0.0323	-1	0	-0.3493
6	297701	297800	297743	5	1	0	0.0323	-1	0	-0.3493
6	298951	299050	298990	3	1	0	0.0315	-1	0	-0.3579
6	299001	299100	299067	3	2	0	0.0315	-1	0	-0.3199
6	299351	299450	299406	3	1	0	0.0325	-1	0	-0.3421
6	299401	299500	299418	2	1	0	0.0325	-1	0	-0.3421
6	299451	299550	299533	6	1	0	0.0673	-1	0	-0.1433
6	299501	299600	299551	10	1	0	0.0673	-1	0	-0.1433
6	303401	303500	303477	7	3	0	0.0245	-1	0	-0.348
6	303451	303550	303494	7	3	0	0.0245	-1	0	-0.348
6	305201	305300	305263	8	2	0	0.0013	-1	0	-0.0073
6	305251	305350	305283	8	2	0	0.0013	-1	0	-0.0073
6	305501	305600	305558	12	5	0	0	-1	0	-0.0017
6	305551	305650	305600	18	7	0	0	-1	0	-0.0001
6	342501	342600	342564	6	2	0	0.0282	-1	0	-0.326
6	342551	342650	342603	11	3	0	0.0282	-1	0	-0.3234
6	344051	344150	344105	9	2	0	0.003	-1	0	-0.0032
6	344101	344200	344141	6	3	0	0.003	-1	0	-0.0032
6	349501	349600	349542	2	1	0	0.0007	-1	0	-0.0073
6	349551	349650	349600	3	1	0	0.0007	-1	0	-0.0073
6	361151	361250	361215	4	1	0	0.0005	-1	0	-0.0091
6	361201	361300	361271	5	1	0	0.0005	-1	0	-0.0091
6	365901	366000	365953	3	3	0	0.0004	-1	1.0396	-0.0303
6	365951	366050	366015	7	2	0	0.0004	-1	1.0396	-0.0381
6	368301	368400	368350	4	1	0	0.0329	-1	0	-0.3291
6	368351	368450	368404	6	1	0	0.0329	-1	0	-0.3291
6	368701	368800	368761	3	1	0	0.0329	-1	0	-0.3291
6	368751	368850	368793	3	1	0	0.0329	-1	0	-0.3291
6	368901	369000	368936	6	3	0	0.0005	-1	0	-0.0104
6	368951	369050	368990	3	1	0	0.0005	-1	0	-0.0104
6	369051	369150	369096	2	1	0	0.0007	-1	0	-0.0071
6	369101	369200	369122	1	1	0	0.0007	-1	0	-0.0071
6	371351	371450	371414	5	1	0	0.0007	-1	0	-0.0071
6	371401	371500	371442	8	1	0	0.0007	-1	0	-0.0071
6	372951	373050	372980	4	1	0	0.1049	-1	0	-0.1084
6	373001	373100	373066	4	2	0	0.1049	-1	0	-0.1084
6	373151	373250	373193	3	1	0	0.0007	-1	0	-0.0071
6	373201	373300	373271	5	1	0	0.0007	-1	0	-0.0071
6	376201	376300	376267	1	1	0	0.0328	-1	0	-0.3321
6	376251	376350	376309	3	1	0	0.0328	-1	0	-0.3321
6	376501	376600	376562	4	2	0	0.0668	-1	0	-0.6586
6	376551	376650	376577	3	2	0	0.0668	-1	0	-0.6586
6	378001	378100	378038	3	2	0	0.003	-1	0	-0.0065
6	378051	378150	378090	2	1	0	0.003	-1	0	-0.0065
6	379251	379350	379316	6	3	0	0.0311	-1	0	-0.3249
6	379301	379400	379330	6	2	0	0.0311	-1	0	-0.3251
6	379801	379900	379834	3	1	0	0.0627	-1	0	-0.6439
6	379851	379950	379889	2	1	0	0.0627	-1	0	-0.6439
6	380801	380900	380900	1	1	0	0.034	-1	0	-0.3349
6	380851	380950	380900	1	1	0	0.034	-1	0	-0.3349
6	382701	382800	382774	5	1	0	0.0337	-1	0	-0.3349
6	382751	382850	382787	4	1	0	0.0337	-1	0	-0.3349
6	382851	382950	382900	6	2	0	0.0647	-1	0	-0.6199
6	382901	383000	382939	4	2	0	0.0647	-1	0	-0.6199
6	384751	384850	384808	4	1	0	0.0608	-1	0	-0.6579
6	384801	384900	384819	3	1	0	0.0608	-1	0	-0.6579
6	389601	389700	389640	2	1	0	0.0324	-1	0	-0.3333
6	389651	389750	389714	3	2	0	0.0324	-1	0	-0.3332
6	389801	389900	389861	3	1	0	0.0007	-1	0	-0.0072
6	389851	389950	389886	2	1	0	0.0007	-1	0	-0.0072
6	390401	390500	390467	2	1	0	0.0007	-1	0	-0.0071
6	390451	390550	390499	5	1	0	0.0007	-1	0	-0.0071
6	392801	392900	392883	2	2	0	0.0656	-1	0	-0.6037
6	392851	392950	392883	2	2	0	0.0656	-1	0	-0.6037
6	393001	393100	393066	3	1	0	0.066	-1	0	-0.661
6	393051	393150	393105	4	2	0	0.066	-1	0	-0.6609
6	394601	394700	394639	4	2	0	0.0007	-1	0	-0.0072
6	394651	394750	394714	2	1	0	0.0007	-1	0	-0.0072
6	400051	400150	400108	5	1	0	0.0283	-1	0	-0.4058
6	400101	400200	400165	10	1	0	0.0283	-1	0	-0.4058
6	400651	400750	400685	3	1	0	0.0255	-1	0	-0.3649
6	400701	400800	400763	3	1	0	0.0255	-1	0	-0.3649
6	403051	403150	403086	5	2	0	0.0276	-1	0	-0.3942
6	403101	403200	403163	5	2	0	0.0276	-1	0	-0.3955
6	404701	404800	404750	5	1	0	0.0006	-1	0	-0.0085
6	404751	404850	404803	6	1	0	0.0006	-1	0	-0.0085
6	405751	405850	405809	5	1	0	0.0278	-1	0	-0.4052
6	405801	405900	405849	6	1	0	0.0278	-1	0	-0.4052
6	407151	407250	407202	2	1	0	0.0006	-1	0	-0.0083
6	407201	407300	407262	4	3	0	0.0006	-1	0	-0.0083
6	409201	409300	409237	6	2	0	0.0284	-1	0	-0.4075
6	409251	409350	409285	3	1	0	0.0284	-1	0	-0.4077
6	410151	410250	410192	4	1	0	0.0286	-1	0	-0.4106
6	410201	410300	410264	7	3	0	0.0286	-1	0	-0.3916
6	410301	410400	410351	9	2	0	0.0276	-1	0	-0.3956
6	410351	410450	410384	8	1	0	0.0276	-1	0	-0.3956
6	413351	413450	413415	8	1	0	0.0006	-1	0	-0.0084
6	413401	413500	413443	8	2	0	0.0006	-1	0	-0.0084
6	414201	414300	414269	4	1	0	0.0281	-1	0	-0.3915
6	414251	414350	414313	7	1	0	0.0281	-1	0	-0.3915
6	414651	414750	414722	6	1	0	0.027	-1	0	-0.3872
6	414701	414800	414757	12	1	0	0.027	-1	0	-0.3872
6	415501	415600	415540	4	1	0	0.0006	-1	0	-0.0084
6	415551	415650	415607	6	1	0	0.0006	-1	0	-0.0084
6	439301	439400	439364	10	1	0	0.0007	-1	0	-0.0075
6	439351	439450	439393	10	1	0	0.0007	-1	0	-0.0075
6	439551	439650	439599	19	2	0	0.0006	-1	0	-0.0078
6	439601	439700	439639	17	2	0	0.0006	-1	0	-0.0078
6	451601	451700	451662	5	1	0	0	-1	0	-0.5531
6	451651	451750	451681	3	1	0	0	-1	0	-0.5531
6	485501	485600	485573	3	1	0	0.0006	-1	0	-0.0078
6	485551	485650	485589	4	1	0	0.0006	-1	0	-0.0078
6	487001	487100	487030	4	1	0	0.0006	-1	0	-0.0079
6	487051	487150	487110	2	2	0	0.0006	-1	0	-0.004
6	492601	492700	492645	16	3	0	0.0006	-1	0	-0.0025
6	492651	492750	492690	11	3	0	0.0012	-1	0	-0.0079
6	492701	492800	492745	8	2	0	0.0006	-1	0	-0.008
6	510951	511050	511014	5	1	0	0.0006	-1	0	-0.0083
6	511001	511100	511050	5	1	0	0.0006	-1	0	-0.0083
6	511451	511550	511508	2	1	0	0.0009	-1	1.0757	-0.0704
6	511501	511600	511563	2	1	0	0.0009	-1	1.0757	-0.0704
6	515001	515100	515050	10	2	0	0.0005	-1	0	-0.0089
6	515051	515150	515103	8	3	0	0.0005	-1	0	-0.0089
6	516351	516450	516417	8	3	0.0232	0.0085	0.4633	0.1009	0.1009
6	516401	516500	516448	10	3	0.0232	0.0085	0.4633	0.1009	0.1009
6	521051	521150	521121	9	2	0	0.0005	-1	0	-0.0096
6	521101	521200	521153	9	3	0	0.0005	-1	0	-0.0094
6	528201	528300	528232	8	1	0	0.0022	-1	0	-0.0023
6	528251	528350	528292	4	2	0	0.0022	-1	0	-0.0022
6	529901	530000	529972	8	2	0	0.0005	-1	0	-0.0008
6	529951	530050	529986	10	2	0	0.0005	-1	0	-0.0008
6	530551	530650	530618	4	1	0	0.0005	-1	0	-0.0096
6	530601	530700	530659	9	1	0	0.0005	-1	0	-0.0096
6	532851	532950	532896	12	3	0	0.0019	-1	0	-0.0053
6	532901	533000	532940	6	2	0	0.0019	-1	0	-0.0053
6	532951	533050	533024	9	4	0	0.0003	-1	0	-0.0016
6	533001	533100	533043	12	5	0	0.0003	-1	0	-0.0015
6	533901	534000	533953	12	5	0	0.0003	-1	0	-0.0004
6	533951	534050	533984	10	4	0	0.0003	-1	0	-0.0004
6	534051	534150	534097	15	4	0	0.0005	-1	0	-0.0096
6	534101	534200	534144	6	1	0	0.0005	-1	0	-0.0096
6	534251	534350	534295	12	3	0	0.0005	-1	0	-0.0073
6	534301	534400	534350	10	3	0	0.0005	-1	0	-0.0073
6	536351	536450	536416	3	1	0	0.0005	-1	0	-0.0093
6	536401	536500	536445	3	1	0	0.0005	-1	0	-0.0093
6	536851	536950	536900	5	4	0	0.0005	-1	0	-0.0069
6	536901	537000	536922	2	2	0	0.0005	-1	0	-0.0094
6	537501	537600	537551	10	2	0	0.0005	-1	0	-0.0097
6	537551	537650	537590	8	2	0	0.0005	-1	0	-0.0094
6	539451	539550	539512	8	4	0.0005	0.0012	-0.3823	0.0186	-0.01
6	539501	539600	539548	13	5	0.0005	0.0012	-0.3823	0.0186	-0.0101
6	540001	540100	540052	2	2	0	0.0005	-1	0	-0.0093
6	540051	540150	540054	1	1	0	0.0005	-1	0	-0.0095
6	544501	544600	544546	4	1	0	0.0005	-1	0	-0.0095
6	544551	544650	544573	4	1	0	0.0005	-1	0	-0.0095
6	545701	545800	545774	3	2	0	0.0032	-1	0	-0.0062
6	545751	545850	545793	4	2	0	0.0032	-1	0	-0.0062
6	547351	547450	547416	4	2	0	0.0011	-1	0	-0.0094
6	547401	547500	547453	6	2	0	0.0011	-1	0	-0.0094
6	547701	547800	547770	4	1	0	0.0034	-1	0	-0.0059
6	547751	547850	547793	5	1	0	0.0034	-1	0	-0.0059
6	548001	548100	548038	2	1	0	0.0005	-1	0	-0.0094
6	548051	548150	548111	4	1	0	0.0005	-1	0	-0.0094
6	550201	550300	550245	5	1	0	0.0005	-1	0	-0.0092
6	550251	550350	550302	6	2	0	0.0005	-1	0	-0.0092
6	556801	556900	556852	9	1	0	0.0006	-1	0	-0.0077
6	556851	556950	556876	7	1	0	0.0006	-1	0	-0.0077
6	557101	557200	557166	9	3	0	0.0006	-1	0	-0.0054
6	557151	557250	557209	14	8	0	0.0013	-1	0	-0.0064
6	557201	557300	557233	9	5	0	0.0006	-1	0	-0.0078
6	557601	557700	557669	4	2	0	0.0003	-1	0	-0.0178
6	557651	557750	557684	5	3	0	0.0003	-1	0	-0.0064
6	557751	557850	557808	4	1	0	0.0004	-1	0	-0.0118
6	557801	557900	557857	7	1	0	0.0004	-1	0	-0.0118
6	558051	558150	558116	8	1	0	0.0005	-1	0	-0.0104
6	558101	558200	558144	9	2	0	0.0005	-1	0	-0.0104
6	558151	558250	558204	9	3	0	0.0003	-1	0	-0.0127
6	558201	558300	558251	12	5	0.0013	0.0003	0.6423	0.0055	0.0055
6	558251	558350	558296	10	6	0.0013	0	1	0.008	0.008
6	558351	558450	558393	4	3	0	0.001	-1	0	-0.0095
6	558401	558500	558456	7	3	0	0.001	-1	0	-0.0094
6	558901	559000	558934	3	1	0	0.0005	-1	0	-0.0097
6	558951	559050	559004	2	1	0	0.0005	-1	0	-0.0097
6	559301	559400	559344	4	1	0	0.0005	-1	0	-0.0097
6	559351	559450	559419	3	2	0	0.0005	-1	0	-0.0095
6	560501	560600	560550	8	3	0	0.0005	-1	0	-0.0092
6	560551	560650	560593	6	2	0	0.0005	-1	0	-0.0092
6	560851	560950	560916	9	3	0	0.001	-1	0	-0.0097
6	560901	561000	560953	9	3	0	0.001	-1	0	-0.0097
6	560951	561050	561001	6	3	0	0.0005	-1	0	-0.0093
6	561001	561100	561025	4	2	0	0.0005	-1	0	-0.0093
6	561101	561200	561150	4	2	0	0.0003	-1	0	-0.0095
6	561151	561250	561184	6	2	0	0.0003	-1	0	-0.0073
6	561301	561400	561360	8	2	0	0.0005	-1	0	-0.0101
6	561351	561450	561397	9	1	0	0.0005	-1	0	-0.0101
6	562851	562950	562935	3	2	0.0007	0.0005	0.1939	0.001	0.001
6	562901	563000	562963	11	7	0.0007	0.0009	-0.1306	0	-0.0005
6	562951	563050	562998	15	7	0	0.0004	-1	0	-0.0019
6	564351	564450	564381	7	2	0	0.0005	-1	0	-0.0095
6	564401	564500	564460	2	2	0	0.0021	-1	0	-0.019
6	564451	564550	564525	3	2	0	0.0026	-1	0	-0.0235
6	564501	564600	564556	4	1	0	0.001	-1	0	-0.0188
6	564951	565050	565002	6	1	0	0.0015	-1	0	-0.0286
6	565001	565100	565044	6	1	0	0.0015	-1	0	-0.0286
6	566551	566650	566600	4	1	0.0014	0	1	0.008	0.008
6	566601	566700	566612	2	1	0.0014	0	1	0.008	0.008
6	573201	573300	573265	12	4	0	0.0001	-1	0	-0.0154
6	573251	573350	573312	16	5	0	0.0001	-1	0	-0.0174
6	581501	581600	581551	7	1	0	0.0017	-1	1.178	-0.1511
6	581551	581650	581585	8	3	0	0.0017	-1	1.178	-0.1327
6	592001	592100	592068	1	1	0.0007	0	1	0.004	0.004
6	592051	592150	592100	2	2	0.0007	0	1	0.004	0.004
6	597601	597700	597645	7	4	0.001	0.0003	0.5404	0.0045	0.0044
6	597651	597750	597702	6	5	0.001	0.0003	0.5404	0.0045	0.0043
6	600051	600150	600109	12	6	0.0005	0	1	0.004	0.0038
6	600101	600200	600138	10	5	0.0005	0	1	0.004	0.0038
6	600601	600700	600662	11	9	0.0006	0	1	0.0013	0.0013
6	600651	600750	600697	15	13	0.0006	0	1	0.0019	0.0018
6	601251	601350	601300	20	6	0	0.0082	-1	0	-0.045
6	601301	601400	601345	16	6	0	0.0082	-1	0	-0.0444
6	620151	620250	620190	10	2	0	0.0004	-1	1.202	-0.0633
6	620201	620300	620264	8	3	0	0.0004	-1	1.2637	-0.1504
6	623951	624050	624014	4	4	0.0007	0	1	0.004	0.0039
6	624001	624100	624014	4	4	0.0007	0	1	0.004	0.0039
6	627301	627400	627363	3	2	0.0007	0	1	0.004	0.004
6	627351	627450	627389	5	3	0.0007	0	1	0.004	0.0039
6	628601	628700	628656	10	9	0.0007	0	1	0.004	0.0037
6	628651	628750	628706	7	6	0.0007	0	1	0.004	0.0038
6	629201	629300	629252	5	2	0	0.0003	-1	0	-0.0661
6	629251	629350	629265	4	2	0	0.0003	-1	0	-0.0661
6	635501	635600	635557	7	2	0	0.0012	-1	2.1644	-0.3925
6	635551	635650	635582	4	2	0	0.0012	-1	2.1644	-0.3925
6	647701	647800	647747	6	2	0.0007	0	1	0.004	0.004
6	647751	647850	647808	10	1	0.0007	0	1	0.004	0.004
6	654001	654100	654061	7	6	0.0014	0	1	0.008	0.0077
6	654051	654150	654089	9	7	0.0014	0	1	0.0078	0.0075
6	659851	659950	659915	3	3	0	0.0005	-1	0	-0.0021
6	659901	660000	659944	3	2	0	0.0005	-1	0	-0.0021
6	660301	660400	660372	8	4	0	0.0005	-1	0	-0.0097
6	660351	660450	660388	8	5	0	0.0005	-1	0	-0.0094
6	665301	665400	665349	8	5	0	0.0005	-1	0	-0.0106
6	665351	665450	665405	11	3	0	0.0005	-1	0	-0.0106
6	665401	665500	665444	11	3	0	0.0005	-1	0	-0.0099
6	665451	665550	665513	11	6	0	0.0005	-1	0	-0.01
6	665651	665750	665696	12	6	0	0.0013	-1	0	-0.0073
6	665701	665800	665745	10	6	0	0.0013	-1	0	-0.0074
6	667601	667700	667657	7	5	0	0.0005	-1	0	-0.0092
6	667651	667750	667696	8	4	0	0.0005	-1	0	-0.0104
6	668951	669050	668998	3	2	0	0.0005	-1	0	-0.01
6	669001	669100	669047	5	5	0	0.0005	-1	0	-0.0094
6	672151	672250	672213	15	7	0	0	-1	0	-0.0052
6	672201	672300	672243	18	9	0	0.0045	-1	0	-0.0045
6	672251	672350	672280	8	5	0	0.0044	-1	0	-0.0045
6	673351	673450	673403	8	7	0	0.0004	-1	0	-0.0096
6	673401	673500	673432	5	4	0	0.0004	-1	0	-0.0103
6	676851	676950	676909	8	4	0.0015	0.0018	-0.0769	0.148	-0.0376
6	676901	677000	676945	11	6	0.0015	0.0018	-0.0769	0.148	-0.0304
6	678901	679000	678935	4	4	0	0.0014	-1	0	-0.0035
6	678951	679050	678983	1	1	0	0.0014	-1	0	-0.0035
6	680201	680300	680257	3	3	0	0.0008	-1	0	-0.0244
6	680251	680350	680275	2	2	0	0.0008	-1	0	-0.0244
6	680851	680950	680895	11	5	0	0.0028	-1	0	-0.0035
6	680901	681000	680955	5	3	0	0.0028	-1	0	-0.0035
6	680951	681050	680994	3	2	0	0.0006	-1	1.6807	-0.2236
6	681001	681100	681056	3	2	0	0.0006	-1	5.2642	-0.3479
6	681401	681500	681473	4	3	0	0.0014	-1	0	-0.0032
6	681451	681550	681490	6	5	0	0.0014	-1	0	-0.0032
6	682951	683050	683006	5	3	0	0.0004	-1	0	-0.0073
6	683001	683100	683044	4	3	0	0.0004	-1	0	-0.0109
6	683701	683800	683736	2	2	0	0.0004	-1	0	-0.0112
6	683751	683850	683812	6	4	0	0.0004	-1	0	-0.0104
6	684151	684250	684206	3	3	0	0.0004	-1	0	-0.0075
6	684201	684300	684239	3	2	0	0.0004	-1	0	-0.0077
6	684401	684500	684461	4	4	0.08	0.0952	-0.087	0	-0.0235
6	684451	684550	684468	3	3	0.08	0.0952	-0.087	0	-0.0242
6	684801	684900	684878	2	2	0	0.0014	-1	0	-0.0035
6	684851	684950	684912	7	5	0	0.0014	-1	0	-0.0035
6	685401	685500	685447	2	2	0.0786	0.094	-0.0895	0	-0.0256
6	685451	685550	685525	3	2	0.0786	0.094	-0.0895	0	-0.0256
6	685901	686000	685965	9	3	0	0.0004	-1	0	-0.0106
6	685951	686050	685978	9	3	0	0.0004	-1	0	-0.0106
6	686851	686950	686903	7	6	0	0.0005	-1	0	-0.009
6	686901	687000	686953	8	7	0	0.0005	-1	0	-0.0094
6	688551	688650	688601	10	4	0.0068	0.0084	-0.1	0.2528	-0.1898
6	688601	688700	688648	11	6	0.0068	0.0084	-0.1	0	-0.0316
6	692901	693000	692958	3	1	0	0.0014	-1	0	-0.0035
6	692951	693050	692990	3	2	0	0.0014	-1	0	-0.0034
6	693051	693150	693124	2	1	0	0.0014	-1	0	-0.0035
6	693101	693200	693124	2	1	0	0.0014	-1	0	-0.0035
6	693201	693300	693250	3	2	0	0.0004	-1	0	-0.0108
6	693251	693350	693295	3	1	0	0.0004	-1	0	-0.0115
6	694601	694700	694656	6	4	0.0154	0.0245	-0.227	0	-0.297
6	694651	694750	694673	5	4	0.0154	0.0245	-0.227	0	-0.2831
6	694751	694850	694810	2	2	0.02	0.0238	-0.087	0	-0.1591
6	694801	694900	694863	4	2	0.02	0.0238	-0.087	0	-0.1731
6	695451	695550	695513	3	2	0.0037	0.0024	0.2187	0.0077	0.0075
6	695501	695600	695532	2	2	0.0037	0.0024	0.2187	0.0077	0.0075
6	696001	696100	696067	5	4	0	0.0004	-1	0	-0.0105
6	696051	696150	696089	5	4	0	0.0004	-1	0	-0.0104
6	696651	696750	696703	7	6	0	0.0004	-1	0	-0.0068
6	696701	696800	696718	4	3	0	0.0004	-1	0	-0.0107
6	696951	697050	697014	19	8	0	0.0002	-1	0.0116	-0.0043
6	697001	697100	697033	14	8	0	0.0002	-1	0.0116	-0.0044
6	698351	698450	698403	19	7	0	0.0004	-1	0	-0.004
6	698401	698500	698455	20	13	0	0.0004	-1	0	-0.0021
6	698501	698600	698558	10	10	0	0.0018	-1	0	-0.0023
6	698551	698650	698575	7	7	0	0.0018	-1	0	-0.0024
6	699651	699750	699696	8	7	0	0.0061	-1	0	-0.1156
6	699701	699800	699747	8	8	0	0.0061	-1	0	-0.188
6	702401	702500	702447	6	2	0	0.0008	-1	0	-0.0066
6	702451	702550	702523	12	6	0	0.001	-1	0	-0.0063
6	702501	702600	702551	14	8	0	0.0003	-1	0	-0.0053
6	702551	702650	702605	14	6	0	0	-1	0	-0.0032
6	705201	705300	705278	2	1	0.0034	0.0003	0.8339	0.0086	0.0086
6	705251	705350	705296	3	2	0.0034	0.0003	0.8339	0.0086	0.0086
6	706501	706600	706551	11	4	0	0.0008	-1	0	-0.006
6	706551	706650	706596	9	3	0	0.0008	-1	0	-0.0053
6	706701	706800	706753	13	8	0	0.0008	-1	0	-0.0057
6	706751	706850	706791	9	6	0	0.0008	-1	0	-0.0058
6	706801	706900	706861	8	3	0	0.0001	-1	10.4167	-0.0525
6	706851	706950	706904	14	7	0	0.0001	-1	0	-0.0016
6	708851	708950	708930	4	3	0	0.0005	-1	0	-0.0046
6	708901	709000	708936	5	4	0	0.0005	-1	0	-0.0046
6	709651	709750	709702	16	9	0	0.0005	-1	0	-0.0051
6	709701	709800	709738	11	6	0	0.0005	-1	0	-0.0066
6	709801	709900	709832	7	3	0	0.0004	-1	0	-0.0122
6	709851	709950	709910	4	4	0	0.0004	-1	0	-0.0123
6	711501	711600	711564	2	2	0	0.0014	-1	0	-0.0035
6	711551	711650	711585	3	2	0	0.0014	-1	0	-0.0035
6	719951	720050	720012	4	1	0.0935	0.0136	0.7455	0.2333	0.2333
6	720001	720100	720058	6	1	0.0935	0.0136	0.7455	0.2333	0.2333
6	722601	722700	722653	3	1	0	0.0004	-1	0	-0.0118
6	722651	722750	722698	3	2	0	0.0004	-1	0	-0.0117
6	723301	723400	723371	5	4	0	0.0004	-1	0	-0.0074
6	723351	723450	723388	5	3	0	0.0004	-1	0	-0.0077
6	725951	726050	725998	7	1	0	0.0005	-1	0	-0.011
6	726001	726100	726032	4	1	0	0.0005	-1	0	-0.011
6	726301	726400	726345	7	2	0	0.0004	-1	0	-0.0115
6	726351	726450	726379	6	1	0	0.0004	-1	0	-0.0118
6	726651	726750	726717	6	2	0.0084	0.0011	0.7605	0.0204	0.0203
6	726701	726800	726748	10	2	0.0084	0.0011	0.7605	0.0204	0.0203
6	731501	731600	731570	3	3	0	0.0004	-1	0	-0.0126
6	731551	731650	731610	4	4	0	0.0004	-1	0	-0.0121
6	732901	733000	732952	2	1	0	0.0004	-1	0	-0.012
6	732951	733050	732965	1	1	0	0.0004	-1	0	-0.012
6	735401	735500	735488	1	1	0.1434	0.0339	0.6173	0.4338	0.4338
6	735451	735550	735504	2	1	0.1434	0.0339	0.6173	0.4338	0.4338
6	736301	736400	736367	4	2	0	0.0004	-1	0	-0.0115
6	736351	736450	736397	4	1	0	0.0004	-1	0	-0.0121
6	738301	738400	738336	8	1	0.0018	0.0061	-0.5426	0.0752	-0.0337
6	738351	738450	738362	3	1	0.0018	0.0061	-0.5426	0.0752	-0.0337
6	742151	742250	742204	6	2	0.0022	0.0075	-0.5399	0.0929	-0.0416
6	742201	742300	742255	7	4	0.0022	0.0075	-0.5399	0.0925	-0.0402
6	742551	742650	742599	5	3	0.0005	0.0015	-0.5115	0.0174	-0.0081
6	742601	742700	742658	6	4	0.0005	0.0015	-0.5115	0.0174	-0.0081
6	744051	744150	744088	6	2	0.0812	0.0208	0.5921	0.2545	0.2528
6	744101	744200	744158	7	3	0.0812	0.0208	0.5921	0.2545	0.2514
6	748601	748700	748658	5	2	0	0.0004	-1	0	-0.0127
6	748651	748750	748687	7	3	0	0.0004	-1	0	-0.0127
6	752401	752500	752454	8	2	0	0.0004	-1	0	-0.0206
6	752451	752550	752485	5	2	0	0.0009	-1	0	-0.0255
6	752501	752600	752518	1	1	0	0.0004	-1	0	-0.0127
6	756651	756750	756709	14	3	0	0.0004	-1	0	-0.0078
6	756701	756800	756753	18	5	0	0.0004	-1	0	-0.0077
6	758651	758750	758692	7	3	0	0.0001	-1	8.7143	-0.5938
6	758701	758800	758768	7	6	0	0.0006	-1	0	-0.9075
6	758751	758850	758798	10	8	0	0.001	-1	22.1436	-0.8996
6	758801	758900	758845	9	4	0	0.0005	-1	7.3875	-0.8566
6	758951	759050	759003	5	1	0	0.0001	-1	7.8125	-0.872
6	759001	759100	759049	7	3	0	0.0003	-1	3.4739	-0.3503
6	759051	759150	759091	7	4	0	0.0007	-1	5.5121	-0.5264
6	759101	759200	759154	10	4	0	0.0004	-1	0	-0.0209
6	759251	759350	759308	10	3	0	0	-1	0	-0.0113
6	759301	759400	759352	10	4	0	0	-1	0	-0.0098
6	759351	759450	759402	12	7	0	0.0004	-1	0	-0.0013
6	759401	759500	759443	13	6	0	0.0008	-1	0	-0.0023
6	759451	759550	759499	14	4	0	0.0005	-1	0	-0.5628
6	759501	759600	759544	13	3	0	0.0002	-1	0	-0.3839
6	759601	759700	759654	6	3	0.0004	0.0007	-0.2252	0	-0.1005
6	759651	759750	759718	9	4	0.0004	0.0008	-0.2621	0	-0.1046
6	759701	759800	759745	9	2	0	0.0001	-1	0	-0.1269
6	759751	759850	759795	9	1	0	0.0002	-1	0	-0.8641
6	759801	759900	759837	10	3	0	0.0004	-1	12.8176	-0.7567
6	759851	759950	759882	5	2	0	0.0002	-1	3.1538	-0.6719
6	759951	760050	760036	3	1	0	0	-1	1.5601	-0.359
6	760001	760100	760054	5	2	0	0.0003	-1	2.0126	-0.494
6	760051	760150	760114	9	2	0	0.0003	-1	0	-0.013
6	760501	760600	760550	12	4	0.0908	0.0225	0.6024	0.2584	0.2583
6	760551	760650	760597	15	7	0.0908	0.0225	0.6024	0.2804	0.2803
6	760601	760700	760646	10	6	0	0	-1	0	-0.2767
6	760651	760750	760704	7	2	0	0	-1	2.4118	-0.4029
6	760751	760850	760813	8	1	0	0.0002	-1	1.6412	-0.3907
6	760801	760900	760848	12	3	0	0.0005	-1	2.8271	-0.5793
6	760851	760950	760892	9	2	0	0.0003	-1	4.4466	-0.7657
6	760951	761050	761014	7	1	0	0.0001	-1	0	-0.7726
6	761001	761100	761050	10	1	0	0.0001	-1	0	-0.7726
6	761151	761250	761209	14	5	0	0.0003	-1	0	-0.3075
6	761201	761300	761254	20	8	0.0794	0.0189	0.6163	0.2334	0.2325
6	761251	761350	761289	16	4	0.0794	0.0185	0.6218	0.2351	0.2346
6	761551	761650	761608	15	4	0	0.0007	-1	0	-0.0572
6	761601	761700	761629	13	6	0	0.001	-1	0	-0.0852
6	761651	761750	761706	9	2	0	0.0004	-1	3.9553	-0.6821
6	761851	761950	761940	4	3	0	0.0003	-1	30.8338	-0.6424
6	761901	762000	761968	10	6	0	0.0003	-1	0	-0.0714
6	761951	762050	762006	10	4	0	0.0004	-1	0	-0.08
6	762001	762100	762057	7	1	0	0.0004	-1	3.2979	-0.6968
6	762251	762350	762305	5	1	0	0.0003	-1	7.3529	-0.864
6	762301	762400	762356	7	4	0	0.0009	-1	3.3376	-0.6759
6	762351	762450	762394	10	7	0	0.0008	-1	0	-0.0353
6	762401	762500	762438	7	4	0	0.0002	-1	0	-0.0096
6	762601	762700	762650	10	2	0	0.0004	-1	0	-0.0127
6	762651	762750	762705	11	5	0	0.0004	-1	0.0139	-0.0024
6	763101	763200	763145	4	1	0.1366	0.0347	0.595	0.427	0.427
6	763151	763250	763216	6	1	0.1366	0.0347	0.595	0.427	0.427
6	764101	764200	764164	7	4	0	0.0001	-1	0	-0.08
6	764151	764250	764206	8	3	0	0.0005	-1	0	-0.0157
6	764201	764300	764248	7	1	0	0.0004	-1	0	-0.013
6	772451	772550	772497	17	3	0.1391	0.0322	0.6236	0.4167	0.4154
6	772501	772600	772552	12	5	0.1391	0.0322	0.6236	0.4167	0.4107
6	772701	772800	772746	13	2	0.0034	0.0009	0.5944	0.0106	0.0106
6	772751	772850	772808	10	1	0.0034	0.0009	0.5944	0.0106	0.0106
6	777651	777750	777697	5	3	0	0	-1	0	-0.0192
6	777701	777800	777736	4	2	0	0	-1	0	-0.1361
6	779501	779600	779554	1	1	0	0.0004	-1	0	-0.014
6	779551	779650	779554	1	1	0	0.0004	-1	0	-0.014
6	785801	785900	785862	5	4	0	0.0004	-1	0	-0.0116
6	785851	785950	785870	4	3	0	0.0004	-1	0	-0.0125
6	786601	786700	786668	11	2	0	0.0058	-1	0	-0.2551
6	786651	786750	786686	16	5	0	0.0058	-1	0	-0.1201
6	786751	786850	786811	12	5	0	0.0004	-1	0	-0.0061
6	786801	786900	786844	11	5	0	0.0004	-1	0	-0.0101
6	787651	787750	787700	12	10	0.0034	0.0008	0.6277	0.0084	0.0082
6	787701	787800	787735	7	4	0.0034	0.0008	0.6277	0.0102	0.01
6	787951	788050	787998	6	4	0.0034	0.0008	0.5983	0.0105	0.0103
6	788001	788100	788057	12	9	0.0067	0.0017	0.5845	0.0106	0.0104
6	788051	788150	788077	11	9	0.0033	0.0009	0.5705	0.0107	0.0102
6	788101	788200	788150	5	4	0	0.0008	-1	0	-0.0117
6	788151	788250	788182	4	2	0	0.0008	-1	0	-0.0122
6	791301	791400	791342	4	2	0	0.0059	-1	0	-0.2498
6	791351	791450	791391	3	2	0	0.0119	-1	0	-0.2702
6	791401	791500	791462	2	2	0	0.0121	-1	0	-0.2678
6	791451	791550	791496	1	1	0	0.0061	-1	0	-0.2632
6	791551	791650	791631	3	2	0	0.0053	-1	0	-0.0973
6	791601	791700	791645	4	2	0	0.0053	-1	0	-0.0973
6	791751	791850	791820	4	2	0	0.0059	-1	0	-0.0218
6	791801	791900	791835	3	2	0	0.0059	-1	0	-0.0218
6	791951	792050	791990	2	1	0	0.0059	-1	0	-0.2703
6	792001	792100	792070	3	2	0	0.0114	-1	0	-0.2643
6	792051	792150	792117	7	5	0	0.0165	-1	0	-0.2594
6	792101	792200	792124	5	4	0	0.011	-1	0	-0.26
6	792201	792300	792263	4	3	0	0.0254	-1	0	-0.6604
6	792251	792350	792292	5	3	0	0.0254	-1	0	-0.6604
6	792351	792450	792383	6	1	0	0.0061	-1	0	-0.262
6	792401	792500	792439	3	2	0	0.0115	-1	0	-0.2622
6	792451	792550	792496	2	1	0	0.0054	-1	0	-0.2623
6	793101	793200	793163	8	6	0	0.0204	-1	0	-0.0582
6	793151	793250	793174	6	4	0	0.0204	-1	0	-0.2228
6	793501	793600	793568	3	3	0	0.0099	-1	0	-0.0309
6	793551	793650	793594	4	4	0	0.0099	-1	0	-0.2274
6	793601	793700	793644	6	4	0	0.0062	-1	0	-0.2624
6	793651	793750	793674	5	3	0	0.0062	-1	0	-0.263
6	793801	793900	793860	5	3	0	0.0104	-1	0	-0.244
6	793851	793950	793888	6	4	0	0.0104	-1	0	-0.2382
6	794051	794150	794090	2	1	0	0.0059	-1	0	-0.2711
6	794101	794200	794150	3	3	0	0.0179	-1	0	-0.2707
6	794151	794250	794193	5	4	0	0.0209	-1	0	-0.2609
6	794201	794300	794231	5	2	0	0.0089	-1	0	-0.2489
6	794251	794350	794296	5	2	0	0.0055	-1	0	-0.2352
6	794301	794400	794322	3	2	0	0.0055	-1	0	-0.2352
6	794551	794650	794626	2	1	0	0.0062	-1	0	-0.2667
6	794601	794700	794636	3	2	0	0.0121	-1	0	-0.2679
6	794651	794750	794710	4	3	0	0.0119	-1	0	-0.2644
6	794701	794800	794746	4	3	0	0.0121	-1	0	-0.261
6	794751	794850	794818	6	4	0	0.0224	-1	0	-0.2401
6	794801	794900	794839	8	6	0	0.0339	-1	0	-0.2435
6	794851	794950	794867	3	3	0	0.0176	-1	0	-0.2542
6	794901	795000	794980	4	4	0	0.0163	-1	0	-0.176
6	794951	795050	794995	6	4	0	0.0163	-1	0	-0.176
6	795201	795300	795252	2	2	0	0.0061	-1	0	-0.1316
6	795251	795350	795304	4	1	0	0.0061	-1	0	-0.2632
6	795401	795500	795464	2	2	0	0.0107	-1	0	-0.2357
6	795451	795550	795464	2	2	0	0.0107	-1	0	-0.2357
6	795601	795700	795665	7	3	0	0.0173	-1	0	-0.2588
6	795651	795750	795670	6	3	0	0.0173	-1	0	-0.2588
6	796101	796200	796166	5	3	0	0.0102	-1	0	-0.2443
6	796151	796250	796197	8	5	0	0.0263	-1	0	-0.2557
6	796201	796300	796238	6	4	0	0.0161	-1	0	-0.2517
6	796251	796350	796288	3	2	0	0.0059	-1	0	-0.2531
6	796301	796400	796319	1	1	0	0.0059	-1	0	-0.2715
6	796501	796600	796551	7	2	0	0.0061	-1	0	-0.2619
6	796551	796650	796589	5	3	0	0.0061	-1	0	-0.2619
6	796601	796700	796666	7	3	0	0.0054	-1	0	-0.2323
6	796651	796750	796704	10	2	0	0.0054	-1	0	-0.2324
6	796701	796800	796762	18	3	0	0.0114	-1	0	-0.2471
6	796751	796850	796792	20	5	0	0.0114	-1	0	-0.247
6	796801	796900	796849	15	6	0	0.0003	-1	0	-0.0145
6	796851	796950	796903	16	10	0	0.0003	-1	0	-0.0145
6	796901	797000	796949	14	11	0	0.0003	-1	0	-0.0073
6	796951	797050	797001	14	11	0	0.0003	-1	0	-0.0036
6	797001	797100	797034	10	8	0	0.0003	-1	0	-0.0049
6	797051	797150	797110	6	3	0	0.0003	-1	0	-0.0147
6	797251	797350	797300	16	9	0	0.0003	-1	0	-0.0036
6	797301	797400	797337	11	10	0	0.0003	-1	0	-0.0029
6	797401	797500	797450	14	4	0	0.0003	-1	0	-0.0145
6	797451	797550	797498	11	1	0	0.0003	-1	0	-0.0146
6	798751	798850	798825	4	4	0	0.0059	-1	0	-0.0893
6	798801	798900	798846	7	6	0	0.0059	-1	0	-0.0661
6	798951	799050	798998	11	6	0	0.0061	-1	0	-0.0632
6	799001	799100	799057	13	6	0	0.0182	-1	0	-0.2522
6	799051	799150	799078	8	3	0	0.0122	-1	0	-0.263
6	799201	799300	799286	4	3	0	0.0047	-1	0	-0.23
6	799251	799350	799311	10	8	0	0.0287	-1	0	-0.2582
6	799301	799400	799343	8	5	0	0.024	-1	0	-0.2646
6	799401	799500	799456	3	3	0	0.0059	-1	0	-0.1401
6	799451	799550	799492	3	3	0	0.0116	-1	0	-0.2396
6	799501	799600	799554	5	4	0	0.0057	-1	0	-0.0781
6	799601	799700	799651	3	2	0	0.0059	-1	0	-0.2701
6	799651	799750	799660	2	1	0	0.0059	-1	0	-0.2703
6	800001	800100	800040	12	1	0	0.0057	-1	0	-0.2485
6	800051	800150	800092	7	1	0	0.0057	-1	0	-0.2485
6	800351	800450	800406	7	1	0	0.0165	-1	0	-0.7132
6	800401	800500	800422	5	1	0	0.0165	-1	0	-0.7132
6	800451	800550	800538	1	1	0	0.0161	-1	0	-0.6986
6	800501	800600	800565	4	3	0	0.0319	-1	0	-0.7213
6	800551	800650	800582	4	3	0	0.0322	-1	0	-0.7289
6	800601	800700	800634	2	2	0	0.0165	-1	0	-0.713
6	800851	800950	800933	2	1	0	0.0004	-1	0	-0.0129
6	800901	801000	800953	3	1	0	0.0004	-1	0	-0.0129
6	801101	801200	801144	7	1	0	0.0004	-1	0	-0.0129
6	801151	801250	801177	4	1	0	0.0004	-1	0	-0.0129
6	802851	802950	802904	9	4	0.074	0.0142	0.6786	0.186	0.1726
6	802901	803000	802946	8	4	0.074	0.0142	0.6786	0.1882	0.1812
6	803201	803300	803245	3	1	0	0.0004	-1	0	-0.0126
6	803251	803350	803260	2	1	0	0.0004	-1	0	-0.0126
6	810551	810650	810606	5	3	0	0.0004	-1	0	-0.009
6	810601	810700	810647	6	4	0	0.0008	-1	0	-0.0106
6	810651	810750	810689	5	2	0	0.0004	-1	0	-0.0129
6	812551	812650	812592	6	3	0.0224	0.0726	-0.5278	0	-0.0882
6	812601	812700	812664	4	1	0.0224	0.0726	-0.5278	0.8358	-0.391
6	812651	812750	812704	8	2	0	0	-1	0	-0.1346
6	812701	812800	812730	6	3	0	0	-1	0	-0.0027
6	817551	817650	817617	8	4	0.0947	0.0156	0.7168	0.2468	0.2376
6	817601	817700	817653	11	4	0.0947	0.0156	0.7168	0.1238	0.1237
6	817651	817750	817688	9	3	0.0206	0.0727	-0.5584	0	-0.1065
6	817701	817800	817764	9	3	0.0206	0.0727	-0.5584	0	-0.1057
6	817851	817950	817930	9	5	0.0005	0.0015	-0.5213	0.0465	-0.0059
6	817901	818000	817952	18	7	0.0005	0.0015	-0.5213	0.0465	-0.0059
6	818601	818700	818664	6	2	0	0.0004	-1	0	-0.0057
6	818651	818750	818688	8	1	0	0.0004	-1	0	-0.0129
6	819701	819800	819759	4	2	0	0.0011	-1	0	-0.0046
6	819751	819850	819783	4	2	0	0.0011	-1	0	-0.0046
6	821401	821500	821448	3	2	0	0.0004	-1	0	-0.0131
6	821451	821550	821512	4	3	0.2235	0.0221	0.8201	0.2374	0.2373
6	821501	821600	821536	4	2	0.2235	0.0217	0.8228	0.246	0.246
6	821851	821950	821911	2	2	0.0207	0.0724	-0.5554	0.8695	-0.3828
6	821901	822000	821968	3	2	0.0207	0.0724	-0.5554	0	-0.0949
6	822401	822500	822450	12	2	0	0.0004	-1	0	-0.0057
6	822451	822550	822490	6	2	0	0.0004	-1	0	-0.0057
6	822501	822600	822538	2	1	0	0.0004	-1	0	-0.0115
6	822551	822650	822609	4	2	0	0.0008	-1	0	-0.0117
6	822601	822700	822646	5	2	0	0.0004	-1	0.0172	-0.0025
6	822701	822800	822751	2	1	0	0.021	-1	0	-0.6289
6	822751	822850	822778	1	1	0	0.021	-1	0	-0.6289
6	822851	822950	822890	4	1	0.0198	0.0705	-0.5615	0.8392	-0.3662
6	822901	823000	822952	3	1	0.0198	0.0705	-0.5615	0.8392	-0.3662
6	825501	825600	825565	1	1	0	0.0004	-1	0	-0.0118
6	825551	825650	825616	3	1	0	0.0004	-1	0	-0.0118
6	826251	826350	826297	4	1	0	0.0004	-1	0	-0.0127
6	826301	826400	826340	3	1	0	0.0004	-1	0	-0.0127
6	827401	827500	827448	11	2	0	0.0203	-1	0	-0.6335
6	827451	827550	827475	6	1	0	0.0203	-1	0	-0.6336
6	827501	827600	827573	3	3	0	0.0004	-1	0	-0.0132
6	827551	827650	827600	6	4	0	0.0004	-1	0	-0.0131
6	828351	828450	828384	4	1	0	0.0004	-1	0	-0.0129
6	828401	828500	828454	9	1	0	0.0004	-1	0	-0.0129
6	829001	829100	829050	5	2	0	0.0203	-1	0	-0.6335
6	829051	829150	829069	3	1	0	0.0203	-1	0	-0.6336
6	829551	829650	829595	9	2	0	0.0004	-1	0	-0.0128
6	829601	829700	829646	6	1	0	0.0004	-1	0	-0.0129
6	832101	832200	832163	6	1	0	0.0204	-1	0	-0.6012
6	832151	832250	832185	5	1	0	0.0204	-1	0	-0.6012
6	832351	832450	832405	5	3	0	0.0229	-1	0	-0.3297
6	832401	832500	832447	5	3	0	0.0229	-1	0	-0.3297
6	834451	834550	834502	5	3	0	0.0004	-1	0	-0.0128
6	834501	834600	834536	4	3	0	0.0004	-1	0	-0.0128
6	834951	835050	835010	7	1	0.0188	0.0299	-0.2281	2.4868	-0.8708
6	835001	835100	835036	7	1	0.0188	0.0299	-0.2281	2.4868	-0.8708
6	836251	836350	836332	4	1	0.0009	0.0041	-0.6305	0.1973	-0.0571
6	836301	836400	836354	7	2	0.0009	0.0041	-0.6305	0	-0.0361
6	838651	838750	838683	11	3	0.0009	0.0046	-0.6655	0	-0.034
6	838701	838800	838756	8	3	0.0009	0.0046	-0.6655	0	-0.034
6	838801	838900	838846	5	1	0.3714	0.047	0.7753	0.8351	0.8351
6	838851	838950	838898	6	1	0.3714	0.047	0.7753	0.8351	0.8351
6	839201	839300	839265	4	1	0	0.0004	-1	0	-0.0128
6	839251	839350	839296	6	1	0	0.0004	-1	0	-0.0128
6	844051	844150	844131	2	1	0	0.0004	-1	0	-0.0126
6	844101	844200	844153	6	1	0	0.0004	-1	0	-0.0126
6	845351	845450	845406	14	4	0	0.0008	-1	0	-0.0063
6	845401	845500	845443	14	4	0	0.0008	-1	0	-0.0063
6	847251	847350	847287	4	2	0	0.0004	-1	0	-0.0127
6	847301	847400	847351	5	2	0	0.0004	-1	0	-0.0127
6	849451	849550	849508	11	4	0.0009	0.0014	-0.2411	0	-0.0099
6	849501	849600	849554	18	7	0.0009	0.0014	-0.2411	0	-0.0095
6	849601	849700	849639	13	4	0	0.0004	-1	0	-0.009
6	849651	849750	849681	6	2	0	0.0004	-1	0	-0.0129
6	849701	849800	849765	5	3	0	0.0377	-1	5.2886	-0.4072
6	849751	849850	849776	4	3	0	0.0377	-1	5.2886	-0.4072
6	852951	853050	852989	5	2	0.0095	0.0451	-0.6507	0	-0.3714
6	853001	853100	853038	4	2	0.0095	0.0451	-0.6507	1.6708	-0.5664
6	856101	856200	856136	4	2	0	0	-1	0	-0.1357
6	856151	856250	856225	5	2	0	0	-1	0	-0.001
6	859201	859300	859243	10	2	0.0156	0.05	-0.5238	1.2392	-0.4746
6	859251	859350	859307	12	6	0.0156	0.05	-0.5238	1.6242	-0.4332
6	859301	859400	859348	13	6	0.0002	0.001	-0.6263	0.0794	-0.0126
6	859351	859450	859400	12	4	0.0002	0.001	-0.6263	0	-0.0017
6	860601	860700	860673	10	4	0	0.0004	-1	0	-0.0032
6	860651	860750	860695	14	6	0.0978	0.012	0.7812	0.1068	0.0966
6	860701	860800	860755	14	7	0.0978	0.0147	0.739	0.0689	0.0684
6	860751	860850	860772	9	5	0	0.003	-1	0	-0.0068
6	860801	860900	860872	2	1	0	0.0013	-1	1.25	-0.2
6	860851	860950	860904	5	1	0	0.0013	-1	1.25	-0.2
6	861751	861850	861815	4	2	0.0587	0.0084	0.7488	0.1828	0.1827
6	861801	861900	861850	6	2	0.0587	0.0084	0.7488	0.1827	0.1827
6	862001	862100	862059	6	1	0	0.0156	-1	0	-0.3889
6	862051	862150	862084	6	1	0	0.0156	-1	0	-0.3889
6	862451	862550	862521	2	2	0.0153	0.0506	-0.5346	0	-0.076
6	862501	862600	862578	3	1	0.0153	0.0506	-0.5346	1.2194	-0.5059
6	864701	864800	864762	6	4	0.0002	0.001	-0.6316	0.0124	-0.0036
6	864751	864850	864790	6	4	0.0002	0.001	-0.6316	0.0165	-0.0048
6	864801	864900	864847	4	3	0.0002	0.0037	-0.8823	0	-0.0082
6	864851	864950	864899	3	2	0.0002	0.0037	-0.8823	0	-0.0082
6	865851	865950	865929	10	1	0.0045	0.0009	0.6627	0.0174	0.0174
6	865901	866000	865948	12	1	0.0045	0.0009	0.6627	0.0174	0.0174
6	866651	866750	866685	5	2	0	0.0004	-1	0	-0.0009
6	866701	866800	866757	2	1	0	0.0004	-1	0	-0.0134
6	867801	867900	867846	7	3	0.0044	0.0009	0.6567	0.0204	0.0122
6	867851	867950	867889	6	2	0.0044	0.0009	0.6567	0.0176	0.0163
6	868501	868600	868548	7	5	0.0554	0.0101	0.6912	0.113	0.0807
6	868551	868650	868596	5	5	0.0554	0.0101	0.6912	0.1045	0.1008
6	869551	869650	869616	3	3	0	0.0017	-1	0	-0.0043
6	869601	869700	869648	3	3	0	0.0017	-1	0	-0.0038
6	869651	869750	869694	2	2	0	0.0014	-1	0	-0.0032
6	869701	869800	869760	3	1	0	0.0014	-1	0	-0.0036
6	870501	870600	870564	4	2	0.0002	0.001	-0.6272	0.0494	-0.0144
6	870551	870650	870595	5	2	0.0005	0.0021	-0.6296	0.0493	-0.0143
6	870601	870700	870667	5	1	0.0002	0.001	-0.632	0.0493	-0.0142
6	870651	870750	870709	6	1	0.0002	0.001	-0.632	0.0497	-0.0143
6	870701	870800	870758	9	7	0.0007	0.0031	-0.632	0	-0.0034
6	870751	870850	870787	9	7	0.0007	0.0031	-0.6319	0	-0.0034
6	870801	870900	870843	5	1	0.0002	0.001	-0.6316	0.0493	-0.0142
6	872501	872600	872544	3	2	0	0.0008	-1	0	-0.0043
6	872551	872650	872618	2	2	0	0.0008	-1	0	-0.0062
6	872751	872850	872803	3	2	0	0.0015	-1	0	-0.0063
6	872801	872900	872829	2	2	0	0.0015	-1	0	-0.0063
6	873401	873500	873441	11	1	0.0002	0.0011	-0.6413	0.0493	-0.0139
6	873451	873550	873502	10	4	0.0009	0.0042	-0.637	0.0497	-0.0142
6	873501	873600	873524	9	5	0.0009	0.0042	-0.6339	0	-0.0092
6	873551	873650	873605	5	2	0.0002	0.001	-0.6287	0	-0.0044
6	873651	873750	873690	8	5	0.0005	0.0021	-0.6334	0.0503	-0.0146
6	873701	873800	873760	7	1	0.0005	0.0021	-0.6334	0.0987	-0.0283
6	874051	874150	874113	3	1	0	0.0008	-1	0	-0.0062
6	874101	874200	874156	7	1	0	0.0008	-1	0	-0.0062
6	875401	875500	875448	6	1	0	0.0008	-1	0	-0.0062
6	875451	875550	875507	6	1	0	0.0008	-1	0	-0.0062
6	875851	875950	875896	3	1	0	0.0008	-1	0	-0.0064
6	875901	876000	875940	3	1	0	0.0008	-1	0	-0.0064
6	878001	878100	878071	2	1	0	0.0011	-1	1.292	-0.226
6	878051	878150	878097	3	1	0	0.0011	-1	1.292	-0.226
6	878201	878300	878258	4	1	0	0.0011	-1	1.3025	-0.2323
6	878251	878350	878300	7	5	0	0.0019	-1	0	-0.0144
6	878301	878400	878333	5	5	0	0.0008	-1	0	-0.0044
6	878351	878450	878401	4	3	0	0.0008	-1	0	-0.0026
6	878401	878500	878449	6	2	0	0.0008	-1	0	-0.0032
6	880201	880300	880287	2	1	0	0.0014	-1	0	-0.0037
6	880251	880350	880293	3	1	0	0.0014	-1	0	-0.0037
6	880851	880950	880900	10	4	0	0.0011	-1	0	-0.0071
6	880901	881000	880952	10	5	0	0.0011	-1	0	-0.0059
6	881251	881350	881298	13	2	0	0.0008	-1	0	-0.0062
6	881301	881400	881356	10	2	0	0.0008	-1	0	-0.0063
6	881551	881650	881596	9	4	0	0.0008	-1	0	-0.0017
6	881601	881700	881658	9	2	0	0.0008	-1	0	-0.0054
6	882151	882250	882213	19	3	0.0041	0.011	-0.4535	0	-0.0127
6	882201	882300	882240	14	3	0.0041	0.011	-0.4535	0	-0.0164
6	882801	882900	882856	7	2	0	0.0011	-1	1.292	-0.2258
6	882851	882950	882895	8	2	0	0.0011	-1	1.292	-0.2258
6	883701	883800	883739	9	4	0	0.0008	-1	0	-0.0056
6	883751	883850	883786	5	3	0	0.0008	-1	0	-0.0058
6	887451	887550	887496	5	2	0.0018	0.0004	0.6348	0.003	0.003
6	887501	887600	887536	5	1	0.0018	0.0004	0.6348	0.0059	0.0059
6	887651	887750	887736	4	1	0	0.0004	-1	0	-0.013
6	887701	887800	887747	6	2	0	0.0004	-1	0	-0.0129
6	888701	888800	888776	6	1	0	0.0008	-1	0	-0.0063
6	888751	888850	888794	10	1	0	0.0008	-1	0	-0.0063
6	888851	888950	888914	4	1	0	0.0014	-1	0	-0.0036
6	888901	889000	888939	3	2	0	0.0014	-1	0	-0.0036
6	889301	889400	889351	2	1	0	0.0014	-1	0	-0.0036
6	889351	889450	889389	2	1	0	0.0014	-1	0	-0.0036
6	889751	889850	889826	4	2	0	0.0014	-1	0	-0.0036
6	889801	889900	889835	5	2	0	0.0014	-1	0	-0.0036
6	892751	892850	892832	2	1	0	0.0008	-1	0	-0.0063
6	892801	892900	892861	5	2	0	0.0008	-1	0	-0.0056
6	893351	893450	893396	6	2	0	0.0008	-1	0	-0.0043
6	893401	893500	893441	3	1	0	0.0008	-1	0	-0.0062
6	894601	894700	894682	3	1	0	0.0008	-1	0	-0.0063
6	894651	894750	894695	5	1	0	0.0008	-1	0	-0.0063
6	894701	894800	894733	3	1	0.0014	0.0047	-0.5286	0.1194	-0.048
6	894751	894850	894771	1	1	0.0014	0.0047	-0.5286	0.1194	-0.048
6	895051	895150	895119	7	2	0	0.0008	-1	0	-0.0059
6	895101	895200	895150	7	1	0	0.0008	-1	0	-0.006
6	897501	897600	897575	3	1	0	0.0004	-1	0	-0.0137
6	897551	897650	897604	10	3	0	0.0004	-1	0	-0.0136
6	898901	899000	898945	14	4	0	0.0013	-1	0	-0.0028
6	898951	899050	899006	16	5	0	0.0013	-1	0	-0.0029
6	899001	899100	899051	22	9	0	0.0008	-1	0	-0.0039
6	899051	899150	899092	19	5	0	0.0008	-1	0	-0.0097
6	901251	901350	901318	8	5	0	0.0011	-1	0.0257	-0.0053
6	901301	901400	901349	12	5	0	0.0011	-1	0.0121	-0.0068
6	901851	901950	901909	14	6	0	0.0018	-1	0.1328	-0.0726
6	901901	902000	901949	16	9	0	0.0022	-1	0	-0.0103
6	901951	902050	902007	17	6	0	0.0005	-1	0	-0.0024
6	903501	903600	903579	3	1	0	0.0003	-1	10.3333	-0.9032
6	903551	903650	903579	3	1	0	0.0003	-1	10.3333	-0.9032
6	905301	905400	905348	3	1	0	0.0003	-1	10.4167	-0.904
6	905351	905450	905412	2	1	0	0.0003	-1	10.4167	-0.904
6	905751	905850	905818	3	2	0	0.0013	-1	0	-0.0039
6	905801	905900	905874	7	4	0	0.0013	-1	0	-0.0039
6	906001	906100	906072	5	1	0.0002	0	1	0.016	0.016
6	906051	906150	906116	10	2	0.0002	0	1	0.016	0.016
6	906501	906600	906557	4	3	0.0003	0	1	0.0159	0.0159
6	906551	906650	906587	3	2	0.0003	0	1	0.0159	0.0159
6	906601	906700	906658	4	1	0	0.0004	-1	0	-0.0129
6	906651	906750	906692	5	2	0	0.0004	-1	0	-0.0016
6	907001	907100	907066	5	2	0	0.0002	-1	34.0909	-0.5597
6	907051	907150	907080	5	3	0	0.0002	-1	34.0909	-0.3833
6	908251	908350	908300	6	1	0	0.0004	-1	0	-0.0129
6	908301	908400	908337	4	2	0	0.0008	-1	0	-0.0128
6	908351	908450	908414	5	3	0	0.0004	-1	0	-0.0085
6	908451	908550	908505	5	1	0	0.0004	-1	0	-0.0129
6	908501	908600	908543	4	1	0	0.0004	-1	0	-0.0129
6	909251	909350	909293	5	2	0	0.0004	-1	0	-0.0127
6	909301	909400	909345	4	3	0	0.0004	-1	0	-0.0044
6	910351	910450	910416	3	2	0	0.0008	-1	0	-0.0126
6	910401	910500	910442	4	3	0	0.0008	-1	0	-0.0085
6	910601	910700	910654	8	3	0	0.0004	-1	0	-0.0043
6	910651	910750	910705	10	4	0	0.0016	-1	0	-0.0042
6	910701	910800	910764	16	9	0	0.0025	-1	0	-0.0026
6	910751	910850	910800	21	11	0	0.0028	-1	0	-0.0028
6	910801	910900	910839	16	7	0	0.0016	-1	0	-0.0021
6	911451	911550	911501	8	4	0	0.0013	-1	0	-0.0038
6	911501	911600	911546	4	1	0	0.0013	-1	0	-0.004
6	911801	911900	911860	2	2	0	0.0011	-1	0	-0.0091
6	911851	911950	911892	5	3	0	0.0011	-1	0	-0.0091
6	912601	912700	912663	7	3	0	0.0005	-1	0	-0.005
6	912651	912750	912715	9	4	0	0.0011	-1	0	-0.0065
6	912701	912800	912735	5	2	0	0.0005	-1	0	-0.0093
6	915501	915600	915560	4	1	0	0.0004	-1	0	-0.0132
6	915551	915650	915597	5	1	0	0.0004	-1	0	-0.0132
6	915601	915700	915655	4	1	0.0017	0.0005	0.5486	0.006	0.006
6	915651	915750	915704	4	2	0.0017	0.0005	0.5486	0.006	0.006
6	916751	916850	916813	3	1	0	0.0004	-1	0	-0.0129
6	916801	916900	916869	10	1	0	0.0004	-1	0	-0.0129
6	918701	918800	918729	7	2	0.0017	0.0005	0.5728	0.0058	0.0058
6	918751	918850	918805	4	2	0.0017	0.0005	0.5728	0.0058	0.0058
6	918801	918900	918870	11	8	0	0.0012	-1	0	-0.004
6	918851	918950	918887	11	8	0	0.0012	-1	0	-0.004
6	919201	919300	919261	3	2	0	0.0004	-1	0	-0.0081
6	919251	919350	919274	2	1	0	0.0004	-1	0	-0.0128
6	919351	919450	919415	6	3	0	0.0004	-1	0	-0.0128
6	919401	919500	919435	4	2	0	0.0004	-1	0	-0.0128
6	923001	923100	923050	8	6	0	0.0023	-1	0	-0.0109
6	923051	923150	923101	7	3	0	0.0023	-1	0	-0.0109
6	923401	923500	923456	6	2	0.0017	0.0005	0.5561	0.0048	0.0048
6	923451	923550	923501	8	2	0.0017	0.0005	0.5561	0.0059	0.0059
6	923951	924050	923994	6	3	0	0.0013	-1	0	-0.004
6	924001	924100	924047	7	2	0	0.0013	-1	0	-0.004
6	924201	924300	924252	5	2	0.0017	0.0005	0.5528	0.0048	0.0048
6	924251	924350	924304	5	2	0.0017	0.0005	0.5528	0.0048	0.0048
6	924401	924500	924475	2	1	0	0.0005	-1	0	-0.0092
6	924451	924550	924498	4	2	0	0.0005	-1	0	-0.0092
6	924551	924650	924604	6	1	0.0017	0.0005	0.5487	0.006	0.006
6	924601	924700	924634	7	1	0.0017	0.0005	0.5487	0.006	0.006
6	925001	925100	925053	11	3	0	0.0011	-1	0	-0.015
6	925051	925150	925087	7	1	0	0.0011	-1	0	-0.0184
6	932301	932400	932343	11	3	0	0.0004	-1	0	-0.0129
6	932351	932450	932377	6	1	0	0.0004	-1	0	-0.0129
6	1041301	1041400	1041345	16	3	0	0.0021	-1	0	-0.0096
6	1041351	1041450	1041364	8	2	0	0.0021	-1	0	-0.0096
6	1045351	1045450	1045429	7	3	0	0.0005	-1	0	-0.0098
6	1045401	1045500	1045446	11	3	0	0.0005	-1	0	-0.0098
6	1047351	1047450	1047422	6	2	0	0.0005	-1	0	-0.0098
6	1047401	1047500	1047429	7	2	0	0.0005	-1	0	-0.0098
6	1048601	1048700	1048636	3	1	0	0	-1	0	-0.2765
6	1048651	1048750	1048688	2	2	0	0.0005	-1	0	-0.01
6	1048701	1048800	1048757	3	2	0	0.0005	-1	0	-0.009
6	1052751	1052850	1052817	10	4	0.0828	0.0721	0.069	0.2153	0.1533
6	1052801	1052900	1052842	14	6	0.1236	0.1082	0.0664	0.1924	0.1919
6	1052851	1052950	1052901	11	5	0.0409	0.0363	0.0585	0.1188	0.1176
6	1052901	1053000	1052928	7	2	0	0.0002	-1	0	-0.0252
6	1053051	1053150	1053093	16	4	0.0409	0.0357	0.0679	0.1655	0.1635
6	1053101	1053200	1053157	11	6	0.0409	0.0358	0.0669	0.189	0.1859
6	1053151	1053250	1053202	12	4	0	0.0001	-1	0	-0.0198
6	1053351	1053450	1053403	8	2	0	0.0005	-1	0	-0.005
6	1053401	1053500	1053441	8	3	0	0.001	-1	0	-0.0067
6	1053451	1053550	1053489	4	1	0	0.0005	-1	0	-0.0099
6	1053551	1053650	1053609	5	2	0	0.0002	-1	0	-0.0273
6	1053601	1053700	1053656	13	4	0	0.0002	-1	0	-0.0148
6	1053651	1053750	1053684	12	2	0	0	-1	0	-0.0023
6	1062151	1062250	1062202	6	1	0	0.0005	-1	0	-0.01
6	1062201	1062300	1062241	4	1	0	0.0005	-1	0	-0.01
6	1062351	1062450	1062406	2	2	0.0412	0.0359	0.069	0.1654	0.1654
6	1062401	1062500	1062460	5	2	0.0412	0.0359	0.069	0.1208	0.1208
6	1062501	1062600	1062544	2	2	0	0.0005	-1	0	-0.01
6	1062551	1062650	1062601	4	1	0	0.0005	-1	0	-0.0101
6	1062901	1063000	1062984	5	1	0.0814	0.0336	0.4156	0.3315	0.3315
6	1062951	1063050	1063012	13	1	0.0814	0.0336	0.4156	0.3315	0.3315
6	1090151	1090250	1090209	16	1	0	0	-1	0	-0.1383
6	1090201	1090300	1090238	15	2	0	0.0001	-1	0	-0.1383
6	1090251	1090350	1090273	5	1	0	0	-1	0	-0.1383
6	1090551	1090650	1090586	17	6	0	0	-1	0	-0.0504
6	1090601	1090700	1090656	15	7	0	0.0001	-1	0	-0.1107
6	1090651	1090750	1090702	19	4	0	0.0001	-1	0	-0.1357
6	1090901	1091000	1090962	13	6	0	0	-1	0	-0.0005
6	1090951	1091050	1091007	19	7	0	0	-1	0	-0.0005
6	1091301	1091400	1091348	24	4	0.0242	0.0237	0.0099	0.0088	0.0088
6	1091351	1091450	1091393	20	4	0.0242	0.0237	0.0099	0.0088	0.0088
6	1091701	1091800	1091753	22	5	0.1593	0.0662	0.4127	0.65	0.65
6	1091751	1091850	1091794	22	2	0.1593	0.0662	0.4127	0.6512	0.6512
6	1091901	1092000	1091955	21	3	0.023	0.0221	0.0207	0.0197	0.0197
6	1091951	1092050	1092000	17	5	0.023	0.0221	0.0207	0.0197	0.0197
6	1092501	1092600	1092556	11	3	0.0532	0.0467	0.0656	0.038	0.038
6	1092551	1092650	1092579	7	3	0.0532	0.0467	0.0656	0.038	0.038
6	1125901	1126000	1125966	7	3	0	0.0008	-1	0	-0.0099
6	1125951	1126050	1125990	7	3	0	0.0008	-1	0	-0.0099
6	1155651	1155750	1155691	16	1	0	0.0004	-1	0	-0.0118
6	1155701	1155800	1155725	7	1	0	0.0004	-1	0	-0.0118
6	1159051	1159150	1159118	3	1	0	0.0004	-1	0	-0.0132
6	1159101	1159200	1159156	5	2	0	0.0004	-1	0	-0.0132
6	1159651	1159750	1159717	14	4	0	0.0023	-1	0	-0.0048
6	1159701	1159800	1159747	19	8	0	0.0027	-1	0	-0.0042
6	1159751	1159850	1159802	16	6	0	0.0004	-1	0	-0.0023
6	1159801	1159900	1159850	16	5	0	0	-1	0.0013	-0.0005
6	1159851	1159950	1159888	12	3	0	0	-1	0.0013	-0.0005
6	1165451	1165550	1165504	12	3	0	0.0003	-1	0	-0.0034
6	1165501	1165600	1165529	6	2	0	0.0003	-1	0	-0.0094
6	1169001	1169100	1169052	10	5	0	0.0003	-1	0	-0.0151
6	1169051	1169150	1169099	10	2	0	0.0003	-1	0	-0.0152
6	1172001	1172100	1172044	15	4	0	0.0004	-1	0	-0.004
6	1172051	1172150	1172096	13	4	0	0.0004	-1	0	-0.0022
6	1172701	1172800	1172750	3	1	0	0.0008	-1	0	-0.0235
6	1172751	1172850	1172819	10	2	0	0.002	-1	0	-0.0065
6	1172801	1172900	1172839	13	2	0	0.0023	-1	0	-0.0042
6	1172851	1172950	1172908	11	1	0	0.0012	-1	0	-0.0042
6	1182051	1182150	1182098	11	3	0	0.0006	-1	0	-0.0314
6	1182101	1182200	1182157	10	1	0	0.0006	-1	0	-0.0319
6	1182251	1182350	1182314	8	4	0	0.0003	-1	0	-0.0185
6	1182301	1182400	1182333	8	2	0	0.0003	-1	0	-0.0186
6	1227551	1227650	1227618	6	1	0	0.0004	-1	0	-0.0127
6	1227601	1227700	1227650	10	3	0	0.0004	-1	0	-0.0025
6	1227651	1227750	1227691	9	3	0.0008	0.0016	-0.3241	0	-0.0054
6	1227701	1227800	1227773	12	3	0.0008	0.0016	-0.3241	0.0153	-0.0071
6	1246001	1246100	1246061	10	2	0	0.0004	-1	0	-0.0075
6	1246051	1246150	1246093	10	1	0	0.0004	-1	0	-0.013
6	1258101	1258200	1258160	7	2	0	0.0004	-1	0	-0.004
6	1258151	1258250	1258209	16	3	0	0.0004	-1	0	-0.0023
6	1258201	1258300	1258237	15	4	0.0174	0.0182	-0.0231	0	-0.007
6	1258251	1258350	1258290	7	4	0.0174	0.0182	-0.0231	0.0364	-0.017
6	1259051	1259150	1259107	15	3	0.0074	0.0089	-0.0862	0.1314	-0.0731
6	1259101	1259200	1259148	17	6	0.0074	0.0089	-0.0862	0.1316	-0.0727
6	1259251	1259350	1259302	26	7	0	0.0001	-1	0	-0.0015
6	1259301	1259400	1259352	28	4	0	0.0001	-1	0	-0.0022
6	1259751	1259850	1259799	19	3	0	0.0004	-1	0	-0.011
6	1259801	1259900	1259845	14	2	0	0.0004	-1	0	-0.0117
6	1261851	1261950	1261887	12	3	0.0249	0.0643	-0.4411	0	-0.324
6	1261901	1262000	1261944	8	1	0.0249	0.0643	-0.4411	3.9011	-0.8649
6	1267151	1267250	1267197	9	5	0	0.0029	-1	0	-0.0298
6	1267201	1267300	1267257	11	3	0	0.0029	-1	0	-0.0311
6	1268151	1268250	1268216	10	6	0	0.0012	-1	0	-0.0063
6	1268201	1268300	1268250	13	7	0	0.0012	-1	0	-0.0062
6	1268251	1268350	1268309	15	4	0	0	-1	0	-0.1155
6	1268301	1268400	1268345	19	8	0	0	-1	0	-0.0024
6	1288451	1288550	1288514	5	1	0.0282	0.0187	0.2028	0.9091	0.9091
6	1288501	1288600	1288548	5	1	0.0282	0.0187	0.2028	0.9091	0.9091
6	1288551	1288650	1288615	9	2	0.0261	0.0194	0.1455	0.0916	0.0916
6	1288601	1288700	1288637	8	2	0.0261	0.0194	0.1455	0.0916	0.0916
6	1292201	1292300	1292252	12	1	0.0773	0.061	0.1176	0.1024	0.1024
6	1292251	1292350	1292299	13	2	0.0773	0.061	0.1176	0.1024	0.1024
6	1293101	1293200	1293158	6	3	0.0269	0.0256	0.0247	0.1203	0.1202
6	1293151	1293250	1293193	6	2	0.0269	0.0256	0.0247	0.2106	0.2104
6	1312551	1312650	1312606	14	5	0	0	-1	0	-0.0529
6	1312601	1312700	1312649	14	5	0	0	-1	0	-0.1448
6	1341801	1341900	1341876	5	2	0	0.0008	-1	0	-0.0128
6	1341851	1341950	1341882	6	2	0	0.0008	-1	0	-0.0128
6	1346501	1346600	1346566	8	2	0	0.0001	-1	0	-0.0556
6	1346551	1346650	1346595	12	3	0	0.0002	-1	0	-0.0584
6	1346601	1346700	1346640	8	1	0	0.0001	-1	0	-0.0615
6	1347551	1347650	1347599	11	1	0	0.0003	-1	0	-0.0142
6	1347601	1347700	1347643	9	2	0	0.0003	-1	0	-0.0029
6	1347751	1347850	1347800	8	1	0	0.0003	-1	0	-0.0142
6	1347801	1347900	1347848	5	1	0	0.0003	-1	0	-0.0142
6	1347851	1347950	1347915	11	2	0.025	0.0202	0.1067	0.048	0.048
6	1347901	1348000	1347930	10	3	0.025	0.0202	0.1067	0.0478	0.0478
6	1348001	1348100	1348057	12	4	0.0498	0.0406	0.1011	0.8091	0.8088
6	1348051	1348150	1348095	8	3	0.0498	0.0406	0.1011	0.8279	0.8275
6	1348301	1348400	1348377	5	3	0.0329	0.0477	-0.1835	0	-0.0707
6	1348351	1348450	1348400	5	4	0.0329	0.0477	-0.1835	0	-0.0707
6	1349051	1349150	1349096	7	4	0	0.0007	-1	0	-0.0049
6	1349101	1349200	1349159	8	2	0	0.0007	-1	0	-0.0142
6	1357901	1358000	1357955	6	2	0.0513	0.0389	0.1369	0.2246	0.2246
6	1357951	1358050	1358010	6	2	0.0513	0.0389	0.1369	0.2246	0.2246
6	1360001	1360100	1360057	12	3	0	0.0014	-1	0	-0.0502
6	1360051	1360150	1360082	8	2	0	0.0014	-1	0	-0.057
6	1362051	1362150	1362124	3	1	0	0.0002	-1	0	-0.0307
6	1362101	1362200	1362166	10	1	0	0.0002	-1	0	-0.0307
6	1362201	1362300	1362276	6	1	0.0019	0.0161	-0.7928	0.48	-0.0909
6	1362251	1362350	1362300	10	2	0.0019	0.0161	-0.7928	0.4803	-0.0908
6	1362751	1362850	1362806	4	2	0	0.0014	-1	0	-0.0036
6	1362801	1362900	1362854	6	3	0.0043	0.0088	-0.3453	0	-0.0113
6	1362851	1362950	1362907	8	3	0.0043	0.0074	-0.268	0.681	-0.1396
6	1363701	1363800	1363741	12	1	0	0.0002	-1	0	-0.0307
6	1363751	1363850	1363806	11	5	0	0.0002	-1	0	-0.0306
6	1363801	1363900	1363842	10	6	0.1482	0.0107	0.8649	0.4421	0.442
6	1363851	1363950	1363907	8	3	0.1521	0.0182	0.7862	0.4462	0.4053
6	1363901	1364000	1363935	6	1	0.0038	0.0075	-0.3215	0.3289	-0.1883
6	1364601	1364700	1364646	10	1	0.0119	0.0207	-0.2689	0.8288	-0.525
6	1364651	1364750	1364700	11	1	0.0119	0.0207	-0.2689	0.8288	-0.525
6	1364801	1364900	1364853	5	1	0.0043	0.0073	-0.2601	0.2984	-0.1919
6	1364851	1364950	1364890	6	1	0.0043	0.0073	-0.2601	0.2984	-0.1919
6	1365051	1365150	1365135	3	1	0.0043	0.0073	-0.2601	0.296	-0.1903
6	1365101	1365200	1365166	8	1	0.0043	0.0073	-0.2601	0.296	-0.1903
6	1365451	1365550	1365508	9	1	0	0.0002	-1	0	-0.0305
6	1365501	1365600	1365556	15	2	0	0.0002	-1	0	-0.0301
6	1365951	1366050	1366002	12	3	0.0043	0.0073	-0.2627	0.296	-0.1892
6	1366001	1366100	1366039	11	2	0.0043	0.0073	-0.2627	0.296	-0.1892
6	1366051	1366150	1366105	9	1	0.0043	0.0074	-0.2617	0.2984	-0.1913
6	1366101	1366200	1366159	12	4	0.0195	0.0426	-0.3715	0.6563	-0.2877
6	1366151	1366250	1366198	12	4	0.0152	0.0352	-0.3969	0.8031	-0.3116
6	1366501	1366600	1366561	10	1	0.0043	0.0072	-0.2539	0.296	-0.1923
6	1366551	1366650	1366598	12	3	0.0043	0.0072	-0.2539	0.296	-0.1922
6	1367551	1367650	1367595	5	3	0.1405	0.0112	0.852	0.4339	0.4339
6	1367601	1367700	1367646	7	2	0.1405	0.0112	0.852	0.444	0.4365
6	1367701	1367800	1367760	9	2	0	0.0002	-1	0	-0.0182
6	1367751	1367850	1367791	7	1	0	0.0002	-1	0	-0.0306
6	1368101	1368200	1368168	6	2	0	0.0027	-1	0	-0.0071
6	1368151	1368250	1368186	6	2	0	0.0027	-1	0	-0.0071
6	1370251	1370350	1370288	3	2	0.0002	0.0016	-0.789	0	-0.0031
6	1370301	1370400	1370355	3	1	0.0002	0.0016	-0.789	0.048	-0.0092
6	1370401	1370500	1370468	10	3	0	0.0006	-1	0	-0.0496
6	1370451	1370550	1370504	15	4	0	0.0006	-1	0	-0.0612
6	1370501	1370600	1370546	13	3	0	0.0028	-1	2.4248	-0.3276
6	1370551	1370650	1370587	11	3	0	0.0028	-1	0.2436	-0.1073
6	1372301	1372400	1372329	9	4	0	0.0011	-1	0.0829	-0.0234
6	1372351	1372450	1372359	3	2	0	0.0011	-1	0	-0.1365
6	1374101	1374200	1374155	2	1	0	0.0008	-1	0	-0.0063
6	1374151	1374250	1374206	4	2	0	0.0008	-1	0	-0.0047
6	1375001	1375100	1375064	5	1	0	0.0008	-1	0	-0.0063
6	1375051	1375150	1375085	8	3	0	0.0015	-1	0	-0.0029
6	1375101	1375200	1375134	4	3	0	0.0008	-1	0	-0.0018
6	1380701	1380800	1380748	3	2	0.0002	0.0016	-0.7946	0.0493	-0.0092
6	1380751	1380850	1380768	2	2	0.0002	0.0016	-0.7946	0.0493	-0.0092
6	1381001	1381100	1381071	3	3	0.0012	0.0007	0.2702	0.0057	0.0057
6	1381051	1381150	1381093	5	5	0.0012	0.0015	-0.0822	0	-0.0011
6	1381101	1381200	1381127	2	2	0	0.0007	-1	0	-0.0065
6	1381801	1381900	1381846	3	2	0.1794	0.0147	0.8489	0.5876	0.5875
6	1381851	1381950	1381875	3	1	0.1794	0.0147	0.8489	0.5876	0.5876
6	1383851	1383950	1383907	3	1	0.1869	0.0148	0.8534	0.59	0.59
6	1383901	1384000	1383924	2	1	0.1869	0.0148	0.8534	0.59	0.59
6	1384801	1384900	1384871	4	1	0.1859	0.0144	0.8566	0.5853	0.5853
6	1384851	1384950	1384884	5	1	0.1859	0.0144	0.8566	0.5853	0.5853
6	1386401	1386500	1386454	3	1	0.002	0.0179	-0.7999	0.5427	-0.0994
6	1386451	1386550	1386500	4	1	0.002	0.0179	-0.7999	0.5427	-0.0994
6	1386501	1386600	1386556	8	2	0.1777	0.0138	0.8557	0.6054	0.5507
6	1386551	1386650	1386594	12	4	0.1777	0.0138	0.8557	0.6551	0.4971
6	1386901	1387000	1386946	6	2	0.1877	0.0142	0.8592	0.59	0.59
6	1386951	1387050	1386988	1	1	0.1877	0.0142	0.8592	0.59	0.59
6	1390851	1390950	1390917	5	1	0.1912	0.0222	0.7917	0.4546	0.4546
6	1390901	1391000	1390940	5	1	0.1912	0.0222	0.7917	0.4546	0.4546
6	1391951	1392050	1392028	3	3	0	0.0028	-1	0	-0.2449
6	1392001	1392100	1392028	3	3	0	0.0028	-1	0	-0.2449
6	1392501	1392600	1392538	9	2	0.1995	0.0193	0.8233	0.4372	0.4372
6	1392551	1392650	1392579	2	2	0.1995	0.0193	0.8233	0.4372	0.4372
6	1393951	1394050	1393993	6	1	0.1958	0.0206	0.8094	0.4466	0.4466
6	1394001	1394100	1394058	7	1	0.1958	0.0206	0.8094	0.4466	0.4466
6	1394801	1394900	1394858	4	2	0	0.0028	-1	0	-0.2307
6	1394851	1394950	1394896	5	2	0	0.0028	-1	0	-0.2307
6	1394901	1395000	1394968	6	2	0	0.0028	-1	2.2989	-0.5644
6	1394951	1395050	1395013	10	2	0	0.0028	-1	2.2989	-0.5644
6	1395151	1395250	1395213	6	2	0	0.0028	-1	2.2857	-0.562
6	1395201	1395300	1395233	5	2	0	0.0028	-1	2.2857	-0.5538
6	1396101	1396200	1396154	6	1	0.1667	0.0242	0.7464	0.5718	0.5718
6	1396151	1396250	1396204	6	1	0.1667	0.0242	0.7464	0.5718	0.5718
6	1396751	1396850	1396811	7	2	0.198	0.0199	0.8175	0.4421	0.4421
6	1396801	1396900	1396841	9	3	0.198	0.0199	0.8175	0.4512	0.4254
6	1397201	1397300	1397233	12	4	0.1773	0.0154	0.8403	0.5967	0.5859
6	1397251	1397350	1397262	5	2	0.1773	0.0154	0.8403	0.6131	0.6131
6	1398051	1398150	1398122	4	1	0	0.0001	-1	0	-0.0556
6	1398101	1398200	1398132	5	1	0	0.0001	-1	0	-0.0556
6	1398301	1398400	1398366	2	1	0.2178	0.0212	0.8224	0.4797	0.4797
6	1398351	1398450	1398403	5	3	0.2178	0.0212	0.8224	0.4732	0.4732
6	1403301	1403400	1403365	12	5	0.0394	0.0048	0.782	0.0922	0.0922
6	1403351	1403450	1403369	10	4	0.0394	0.0048	0.782	0.0922	0.0922
6	1405601	1405700	1405657	7	3	0.0421	0.004	0.8271	0.0793	0.0786
6	1405651	1405750	1405678	6	2	0.0421	0.004	0.8271	0.0943	0.0932
6	1407051	1407150	1407113	12	7	0.0029	0.0236	-0.7823	0	-0.0277
6	1407101	1407200	1407154	14	6	0.0029	0.0236	-0.7823	0	-0.0277
6	1407351	1407450	1407406	15	7	0.1427	0.0089	0.8822	0.4291	0.4222
6	1407401	1407500	1407427	11	7	0.1427	0.0089	0.8822	0.4329	0.4259
6	1408001	1408100	1408048	9	4	0.1473	0.0095	0.8792	0.4958	0.4366
6	1408051	1408150	1408112	10	3	0.1473	0.0095	0.8792	0.4958	0.4363
6	1409051	1409150	1409108	10	3	0	0	-1	0	-0.179
6	1409101	1409200	1409148	15	6	0	0	-1	0	-0.0068
6	1414751	1414850	1414803	3	1	0.0216	0.0013	0.8848	0.0694	0.0694
6	1414801	1414900	1414841	3	1	0.0216	0.0013	0.8848	0.0694	0.0694
6	1415801	1415900	1415848	4	2	0.0115	0.0091	0.1176	0.3806	0.3803
6	1415851	1415950	1415878	2	1	0.0115	0.0091	0.1176	0.3806	0.3806
6	1416301	1416400	1416370	4	1	0	0.0006	-1	0	-0.0083
6	1416351	1416450	1416400	6	2	0	0.0006	-1	0	-0.0016
6	1417951	1418050	1417992	9	3	0.1517	0.0094	0.8838	0.459	0.459
6	1418001	1418100	1418036	5	2	0.1517	0.0094	0.8838	0.4458	0.4458
6	1424151	1424250	1424203	16	5	0	0.0006	-1	0	-0.0049
6	1424201	1424300	1424248	17	9	0	0.0006	-1	0	-0.0022
6	1424251	1424350	1424310	17	9	0.0239	0.0022	0.8299	0.03	0.0298
6	1424301	1424400	1424347	17	6	0.0239	0.0022	0.8299	0.0384	0.0381
6	1424601	1424700	1424640	22	9	0.0003	0.0021	-0.7625	0	-0.0016
6	1424651	1424750	1424687	15	5	0.0003	0.0021	-0.7625	0	-0.0017
6	1424751	1424850	1424800	4	1	0	0.0197	-1	0	-0.2545
6	1424801	1424900	1424863	4	2	0	0.0197	-1	0	-0.2542
6	1425751	1425850	1425805	3	2	0.0219	0.0013	0.8912	0.0661	0.0661
6	1425801	1425900	1425862	5	1	0.0219	0.0013	0.8912	0.0673	0.0673
6	1426751	1426850	1426788	2	1	0.0219	0.0013	0.8912	0.0673	0.0673
6	1426801	1426900	1426848	3	1	0.0219	0.0013	0.8912	0.0673	0.0673
6	1427601	1427700	1427668	13	4	0.1603	0.0188	0.7902	0.5359	0.5196
6	1427651	1427750	1427706	16	4	0.1606	0.0209	0.7701	0.8454	0.2461
6	1427701	1427800	1427751	14	2	0.0003	0.0021	-0.748	0	-0.003
6	1436051	1436150	1436104	20	5	0.1475	0.009	0.8854	0.4531	0.4531
6	1436101	1436200	1436149	24	4	0.1475	0.009	0.8854	0.4896	0.3865
6	1437201	1437300	1437246	9	4	0	0.0001	-1	0	-0.0003
6	1437251	1437350	1437313	10	3	0	0.0001	-1	0	-0.001
6	1437351	1437450	1437405	22	9	0.0486	0.0915	-0.3061	0	-0.2157
6	1437401	1437500	1437434	19	9	0.0595	0.101	-0.2588	1.5017	-0.2484
6	1437451	1437550	1437485	10	4	0.0108	0.0095	0.0675	0.005	0.004
6	1437501	1437600	1437552	7	4	0.0095	0.0096	-0.005	0	-0.0003
6	1437551	1437650	1437613	7	4	0.0133	0.0199	-0.1968	0.3484	-0.128
6	1437601	1437700	1437644	7	2	0.0038	0.0102	-0.4581	0.296	-0.1349
6	1440701	1440800	1440764	3	2	0	0.0001	-1	0	-0.0547
6	1440751	1440850	1440806	4	2	0	0.0001	-1	0	-0.0547
6	1441151	1441250	1441216	6	2	0	0.0007	-1	0	-0.1755
6	1441201	1441300	1441231	8	2	0	0.0007	-1	0	-0.1755
6	1444201	1444300	1444286	3	1	0	0.0001	-1	0	-0.0553
6	1444251	1444350	1444286	3	1	0	0.0001	-1	0	-0.0553
6	1444801	1444900	1444838	8	4	0.4806	0.0321	0.8749	0.4404	0.4404
6	1444851	1444950	1444914	8	4	0.4806	0.0321	0.8749	0.6267	0.6266
6	1445051	1445150	1445104	10	3	0	0.0001	-1	0	-0.0006
6	1445101	1445200	1445140	11	3	0	0.0001	-1	0	-0.0011
6	1446651	1446750	1446728	8	2	0.0064	0.0053	0.093	0	0.0198
6	1446701	1446800	1446733	9	2	0.0064	0.0053	0.093	0	0.0198
6	1447351	1447450	1447404	6	1	0.0002	0.0023	-0.8214	0.0185	-0.0054
6	1447401	1447500	1447456	10	3	0.0002	0.0023	-0.8214	0	-0.003
6	1447501	1447600	1447560	10	2	0.0063	0.0053	0.0903	0.2114	0.2112
6	1447551	1447650	1447587	8	2	0.0063	0.0053	0.0903	0.2114	0.2112
6	1447751	1447850	1447797	15	1	0.0006	0.0005	0.0443	0.0244	0.0244
6	1447801	1447900	1447858	13	2	0.0006	0.0005	0.0443	0.0216	0.0216
6	1448951	1449050	1449014	14	5	0.0094	0.0095	-0.0074	0	-0.0172
6	1449001	1449100	1449023	12	4	0.0094	0.0095	-0.0074	0	-0.0173
6	1452001	1452100	1452034	18	4	0	0	-1	0	-0.0582
6	1452051	1452150	1452096	9	3	0	0	-1	0.0004	-0.0002
6	1457851	1457950	1457909	6	1	0.0038	0.0106	-0.4754	0.2984	-0.1321
6	1457901	1458000	1457950	6	1	0.0038	0.0106	-0.4754	0.2984	-0.1321
6	1459101	1459200	1459163	7	2	0.0034	0.0096	-0.4754	0.4117	-0.103
6	1459151	1459250	1459216	13	4	0.0034	0.0096	-0.4754	0.7547	-0.0925
6	1460601	1460700	1460634	5	1	0.0482	0.0028	0.8886	0.148	0.148
6	1460651	1460750	1460720	2	1	0.0482	0.0028	0.8886	0.148	0.148
6	1462901	1463000	1462959	8	2	0.0469	0.003	0.8787	0.1277	0.1277
6	1462951	1463050	1462985	9	1	0.0469	0.003	0.8787	0.1514	0.1514
6	1463501	1463600	1463567	3	1	0.0481	0.0029	0.8875	0.148	0.148
6	1463551	1463650	1463615	11	3	0.0481	0.0029	0.8875	0.148	0.148
6	1463701	1463800	1463736	8	1	0.0479	0.003	0.8822	0.148	0.148
6	1463751	1463850	1463779	4	1	0.0479	0.003	0.8822	0.148	0.148
6	1470251	1470350	1470309	7	2	0.0013	0.0009	0.1846	0.0423	0.0422
6	1470301	1470400	1470316	5	2	0.0013	0.0009	0.1846	0.0423	0.0422
6	1470851	1470950	1470881	7	2	0	0.0028	-1	0	-0.0062
6	1470901	1471000	1470942	5	1	0	0.0028	-1	0	-0.0069
6	1471951	1472050	1471997	6	1	0.037	0.0262	0.1717	0.5508	0.5508
6	1472001	1472100	1472055	6	1	0.037	0.0262	0.1717	0.5508	0.5508
6	1472301	1472400	1472360	4	1	0.0369	0.0251	0.1895	0.5869	0.5869
6	1472351	1472450	1472395	5	1	0.0369	0.0251	0.1895	0.5869	0.5869
6	1472551	1472650	1472618	11	8	0.0216	0.0603	-0.4723	0	-0.0499
6	1472601	1472700	1472642	14	9	0.0216	0.0603	-0.4723	0	-0.0491
6	1473151	1473250	1473241	2	1	0	0.0001	-1	0	-0.0556
6	1473201	1473300	1473260	5	3	0.039	0.0024	0.8847	0.124	0.1239
6	1473251	1473350	1473303	6	3	0.039	0.0023	0.8887	0.1242	0.1242
6	1473301	1473400	1473361	10	4	0.0487	0.0028	0.8917	0.1475	0.1475
6	1473351	1473450	1473393	11	5	0.0487	0.0029	0.8888	0.0761	0.0761
6	1473401	1473500	1473441	6	3	0	0.0001	-1	0	-0.0002
6	1473551	1473650	1473631	9	3	0.0855	0.0052	0.886	0.1343	0.1343
6	1473601	1473700	1473657	22	5	0.0855	0.0052	0.886	0.133	0.133
6	1473651	1473750	1473689	18	6	0.0457	0.0028	0.8826	0.1405	0.1405
6	1473701	1473800	1473753	10	5	0.0457	0.0028	0.8826	0.1405	0.1405
6	1473951	1474050	1473998	13	4	0.0704	0.0043	0.8849	0.1801	0.18
6	1474001	1474100	1474053	12	4	0.0704	0.0043	0.8849	0.1844	0.1844
6	1474051	1474150	1474104	13	6	0.046	0.0028	0.8851	0.1505	0.1177
6	1474101	1474200	1474128	8	5	0.046	0.0028	0.8851	0.1506	0.1178
6	1474301	1474400	1474345	8	3	0	0.0001	-1	0.0041	-0.0017
6	1474351	1474450	1474398	5	2	0	0.0001	-1	0.0041	-0.0017
6	1474501	1474600	1474568	2	1	0.0483	0.0028	0.8912	0.148	0.148
6	1474551	1474650	1474602	4	1	0.0483	0.0028	0.8912	0.148	0.148
6	1478301	1478400	1478365	13	3	0	0.0016	-1	0	-0.0028
6	1478351	1478450	1478404	24	10	0.0492	0.0044	0.8365	0.0431	0.0431
6	1478401	1478500	1478441	18	8	0.0492	0.0027	0.8944	0.1031	0.1031
6	1478601	1478700	1478672	8	2	0	0.0032	-1	0	-0.0061
6	1478651	1478750	1478677	7	2	0	0.0032	-1	0	-0.0061
6	1478701	1478800	1478798	1	1	0.0002	0.0024	-0.8425	0.0185	-0.0052
6	1478751	1478850	1478823	3	1	0.0002	0.0024	-0.8425	0.0185	-0.0052
6	1478801	1478900	1478868	7	5	0.0009	0.0094	-0.8289	0.0339	-0.0102
6	1478851	1478950	1478894	8	7	0.0009	0.0094	-0.8289	0.0272	-0.0081
6	1490001	1490100	1490044	14	2	0	0.0021	-1	0	-0.0054
6	1490051	1490150	1490097	13	3	0	0.0021	-1	0	-0.0039
6	1490201	1490300	1490239	8	1	0.0395	0.0267	0.1937	0.5013	0.5013
6	1490251	1490350	1490295	5	2	0.0395	0.0267	0.1937	0.5013	0.4617
6	1493751	1493850	1493807	5	2	0	0.0021	-1	0	-0.009
6	1493801	1493900	1493853	5	1	0	0.0021	-1	0	-0.0095
6	1494251	1494350	1494295	8	1	0	0.0033	-1	0	-0.0061
6	1494301	1494400	1494345	4	1	0	0.0033	-1	0	-0.0061
6	1494501	1494600	1494587	3	2	0	0.0021	-1	0	-0.0054
6	1494551	1494650	1494602	4	2	0	0.0021	-1	0	-0.0054
6	1496551	1496650	1496599	11	2	0.0002	0.0011	-0.639	0.0493	-0.0139
6	1496601	1496700	1496639	6	2	0.0002	0.0011	-0.639	0.0501	-0.0139
6	1504651	1504750	1504690	10	8	0	0.0021	-1	0	-0.0072
6	1504701	1504800	1504718	2	2	0	0.0021	-1	0	-0.0072
6	1508601	1508700	1508661	5	3	0	0.0001	-1	0	-0.0089
6	1508651	1508750	1508713	12	3	0	0.0001	-1	0	-0.0023
6	1514451	1514550	1514497	3	1	0.0028	0.0129	-0.6418	0.6016	-0.1694
6	1514501	1514600	1514566	3	2	0.0028	0.0129	-0.6418	0.1615	-0.0459
6	1514601	1514700	1514642	4	2	0.0028	0.0126	-0.6399	0.1575	-0.0447
6	1514651	1514750	1514687	3	1	0.0028	0.0126	-0.6399	0.592	-0.1674
6	1514801	1514900	1514842	8	4	0	0.0021	-1	0	-0.0023
6	1514851	1514950	1514904	4	1	0	0.0021	-1	0	-0.0094
6	1516601	1516700	1516626	4	1	0	0.0018	-1	0	-0.0109
6	1516651	1516750	1516718	5	4	0.1172	0.0086	0.864	0.2302	0.2293
6	1516701	1516800	1516746	6	3	0.1172	0.0067	0.8912	0.3594	0.3594
6	1516751	1516850	1516796	4	2	0.0028	0.0128	-0.6445	0.2983	-0.0839
6	1516801	1516900	1516841	3	3	0.0028	0.0128	-0.6445	0.1259	-0.0356
6	1516851	1516950	1516921	3	2	0.0032	0.0125	-0.5894	0.1443	-0.0426
6	1516901	1517000	1516937	2	1	0.0032	0.0125	-0.5894	0.5074	-0.1667
6	1518751	1518850	1518818	6	4	0.003	0.0163	-0.6898	0	-0.0166
6	1518801	1518900	1518860	11	5	0.003	0.0163	-0.6898	0	-0.0174
6	1518901	1519000	1518961	10	6	0.0035	0.0195	-0.6923	0	-0.0255
6	1518951	1519050	1518988	8	2	0.0035	0.0195	-0.6923	0	-0.0335
6	1519351	1519450	1519404	1	1	0.0036	0.0192	-0.6855	0.361	-0.107
6	1519401	1519500	1519443	3	2	0.0036	0.0192	-0.6855	0.361	-0.107
6	1521901	1522000	1521968	3	2	0.0311	0.0234	0.143	0.395	0.395
6	1521951	1522050	1521982	4	2	0.0311	0.0234	0.143	0.395	0.395
6	1522651	1522750	1522673	4	1	0.0776	0.0581	0.143	0.1013	0.1013
6	1522701	1522800	1522757	3	1	0.0776	0.0581	0.143	0.1013	0.1013
6	1523801	1523900	1523860	2	1	0.0908	0.0618	0.1895	0.1242	0.1242
6	1523851	1523950	1523878	1	1	0.0908	0.0618	0.1895	0.1242	0.1242
6	1524951	1525050	1524984	6	3	0.1001	0.0659	0.2058	0.1396	0.0814
6	1525001	1525100	1525004	2	1	0.1001	0.0659	0.2058	0.1246	0.1246
6	1531751	1531850	1531802	3	1	0.0002	0.0013	-0.7108	0.0493	-0.0117
6	1531801	1531900	1531852	5	2	0.0002	0.0013	-0.7108	0	-0.0048
6	1533701	1533800	1533740	2	2	0.1198	0.0097	0.8504	0.2322	0.2322
6	1533751	1533850	1533819	6	2	0.1198	0.0097	0.8504	0.1957	0.1957
6	1542401	1542500	1542463	11	5	0	0.0004	-1	0	-0.0009
6	1542451	1542550	1542485	11	7	0	0.0004	-1	0	-0.0005
6	1545951	1546050	1546022	5	5	0.0151	0.0052	0.4869	0.0462	0.0462
6	1546001	1546100	1546055	8	5	0.0151	0.0052	0.4869	0.0541	0.0541
6	1546151	1546250	1546204	6	1	0.015	0.0053	0.4802	0.0548	0.0548
6	1546201	1546300	1546219	4	1	0.015	0.0053	0.4802	0.0548	0.0548
6	1546501	1546600	1546537	8	5	0.013	0.0051	0.4349	0.033	0.033
6	1546551	1546650	1546609	7	2	0.013	0.0051	0.4349	0.0474	0.0474
6	1546601	1546700	1546648	12	4	0.0048	0.0122	-0.4347	0	-0.0435
6	1546651	1546750	1546691	13	7	0.0048	0.0122	-0.4347	0	-0.0257
6	1546751	1546850	1546798	7	4	0	0.0008	-1	0	-0.008
6	1546801	1546900	1546823	3	2	0	0.0008	-1	0	-0.0118
6	1548601	1548700	1548654	6	2	0.0148	0.0055	0.4574	0.0467	0.0467
6	1548651	1548750	1548695	5	1	0.0148	0.0055	0.4574	0.0558	0.0558
6	1549401	1549500	1549457	3	1	0	0.0008	-1	0	-0.0235
6	1549451	1549550	1549509	4	2	0	0.0008	-1	0	-0.0042
6	1557501	1557600	1557551	11	1	0	0.0009	-1	0	-0.0056
6	1557551	1557650	1557600	14	3	0	0.0009	-1	0	-0.0056
6	1560001	1560100	1560048	10	1	0.0291	0.0191	0.2077	0.9378	0.9378
6	1560051	1560150	1560073	7	1	0.0291	0.0191	0.2077	0.9378	0.9378
6	1561801	1561900	1561886	5	1	0.0645	0.0415	0.217	0.2243	0.2243
6	1561851	1561950	1561903	8	1	0.0645	0.0415	0.217	0.2243	0.2243
6	1563701	1563800	1563769	3	1	0.0647	0.0426	0.2053	0.214	0.214
6	1563751	1563850	1563786	5	1	0.0647	0.0426	0.2053	0.214	0.214
6	1570801	1570900	1570868	5	1	0	0.0002	-1	0	-0.4464
6	1570851	1570950	1570897	11	2	0	0.0002	-1	0	-0.2232
6	1571201	1571300	1571268	10	1	0.0361	0.0213	0.2569	0.4093	0.4093
6	1571251	1571350	1571290	14	1	0.0361	0.0213	0.2569	0.4093	0.4093
6	1574701	1574800	1574744	9	1	0.0052	0.0073	-0.1707	0.0546	-0.0515
6	1574751	1574850	1574792	7	1	0.0052	0.0073	-0.1707	0.0546	-0.0515
6	1575901	1576000	1575945	11	1	0.0047	0.0062	-0.131	0.0488	-0.0468
6	1575951	1576050	1576007	11	2	0.0047	0.0062	-0.131	0.0488	-0.0467
6	1581551	1581650	1581603	11	1	0.064	0.0416	0.2121	0.2231	0.2231
6	1581601	1581700	1581638	9	1	0.064	0.0416	0.2121	0.2231	0.2231
6	1582051	1582150	1582116	3	2	0.0662	0.0418	0.2263	0.2195	0.2195
6	1582101	1582200	1582146	3	3	0.0662	0.0418	0.2263	0.2195	0.2195
6	1583101	1583200	1583146	2	1	0.0653	0.0398	0.2429	0.2399	0.2399
6	1583151	1583250	1583209	2	1	0.0653	0.0398	0.2429	0.2399	0.2399
6	1585751	1585850	1585808	4	2	0.0015	0.0124	-0.7893	0.74	-0.1224
6	1585801	1585900	1585822	3	1	0.0015	0.0124	-0.7893	0.74	-0.1224
6	1589551	1589650	1589593	5	2	0.0563	0.0764	-0.1518	6.9838	-0.9501
6	1589601	1589700	1589668	9	2	0.1152	0.1537	-0.1429	9.2602	-0.9794
6	1589651	1589750	1589709	16	3	0.1764	0.231	-0.1342	15.6249	-0.9889
6	1589701	1589800	1589740	11	2	0.1174	0.1538	-0.1342	13.813	-0.9875
6	1589751	1589850	1589812	7	2	0.0585	0.0764	-0.1324	11.6986	-0.9851
6	1589801	1589900	1589858	12	4	0.0585	0.0764	-0.1324	11.6986	-0.9846
6	1592351	1592450	1592445	1	1	0.0045	0.0066	-0.1821	0.0497	-0.0468
6	1592401	1592500	1592464	4	1	0.0045	0.0066	-0.1821	0.0497	-0.0468
6	1602651	1602750	1602718	2	1	0.0143	0.0052	0.4658	0.0533	0.0533
6	1602701	1602800	1602746	1	1	0.0143	0.0052	0.4658	0.0533	0.0533
6	1605101	1605200	1605192	1	1	0	0.0012	-1	0	-0.0041
6	1605151	1605250	1605226	7	3	0.0014	0.0137	-0.8091	0	-0.0298
6	1605201	1605300	1605237	7	2	0.0014	0.0125	-0.7924	0.74	-0.0993
6	1606001	1606100	1606048	8	3	0.0147	0.0063	0.3991	0.0293	0.0213
6	1606051	1606150	1606072	5	3	0.0147	0.0063	0.3991	0.0293	0.0213
6	1606101	1606200	1606184	2	2	0.0146	0.0063	0.3997	0.0636	0.0636
6	1606151	1606250	1606184	2	2	0.0146	0.0063	0.3997	0.0636	0.0636
6	1607001	1607100	1607037	9	2	0.0148	0.0062	0.4074	0.0648	0.0648
6	1607051	1607150	1607080	4	2	0.0148	0.0062	0.4074	0.0648	0.0648
6	1608451	1608550	1608504	5	2	0.0162	0.0071	0.3926	0.0315	0.0315
6	1608501	1608600	1608531	3	1	0.0162	0.0071	0.3926	0.0719	0.0719
6	1610951	1611050	1610993	13	1	0.0075	0.0107	-0.1718	0.0651	-0.0589
6	1611001	1611100	1611016	5	1	0.0075	0.0107	-0.1718	0.0651	-0.0589
6	1612751	1612850	1612788	4	1	0	0.0006	-1	0	-0.0078
6	1612801	1612900	1612838	1	1	0	0.0006	-1	0	-0.0078
6	1614351	1614450	1614418	3	2	0.1001	0.0639	0.2208	0.5323	0.5322
6	1614401	1614500	1614438	4	2	0.1001	0.0639	0.2208	0.5323	0.5322
6	1614651	1614750	1614705	5	1	0	0	-1	10.4167	-0.904
6	1614701	1614800	1614747	4	1	0	0	-1	10.4167	-0.904
6	1616151	1616250	1616222	2	1	0.0067	0.0098	-0.186	0.0592	-0.0532
6	1616201	1616300	1616254	5	1	0.0067	0.0098	-0.186	0.0592	-0.0532
6	1616501	1616600	1616527	5	1	0.0073	0.011	-0.2057	0.066	-0.0585
6	1616551	1616650	1616604	3	1	0.0073	0.011	-0.2057	0.066	-0.0585
6	1618701	1618800	1618754	4	1	0.0005	0	1	0.04	0.04
6	1618751	1618850	1618804	5	1	0.0005	0	1	0.04	0.04
6	1622201	1622300	1622257	14	5	0.0989	0.0611	0.2363	0.0931	0.0931
6	1622251	1622350	1622300	12	2	0.0989	0.0611	0.2363	0.1703	0.1703
6	1625851	1625950	1625902	7	4	0.0015	0.0006	0.4304	0.0079	0.0028
6	1625901	1626000	1625950	10	5	0.0015	0.0006	0.4304	0.0015	0.0015
6	1626151	1626250	1626214	10	2	0.1102	0.0677	0.2385	0.1479	0.1479
6	1626201	1626300	1626240	12	1	0.1102	0.0677	0.2385	0.4547	0.4547
6	1637101	1637200	1637160	6	1	0.0015	0.0006	0.3991	0.0064	0.0064
6	1637151	1637250	1637170	4	1	0.0015	0.0006	0.3991	0.0064	0.0064
6	1646651	1646750	1646711	15	6	0.0003	0.0026	-0.7997	0.1266	-0.0111
6	1646701	1646800	1646735	12	5	0.0003	0.0026	-0.7997	0.8503	-0.021
6	1647001	1647100	1647043	6	2	0.0014	0.0006	0.3875	0.0064	0.0064
6	1647051	1647150	1647107	8	2	0.1122	0.0699	0.2321	0.1924	0.1924
6	1647101	1647200	1647158	13	6	0.1107	0.0693	0.2303	1.2233	0.1722
6	1647401	1647500	1647451	15	5	0.1112	0.0684	0.2385	0.6469	0.1539
6	1647451	1647550	1647477	10	3	0.1112	0.0684	0.2385	0.529	0.2274
6	1657501	1657600	1657565	7	2	0	0.001	-1	0	-0.005
6	1657551	1657650	1657610	9	3	0	0.001	-1	0	-0.005
6	1659551	1659650	1659620	7	2	0.0015	0.0006	0.3959	0.0064	0.0064
6	1659601	1659700	1659659	18	6	0.0015	0.0006	0.3959	0.0114	0.002
6	1660401	1660500	1660464	6	3	0.0029	0.0013	0.3933	0.0105	0.0105
6	1660451	1660550	1660504	6	3	0.0029	0.0013	0.3933	0.0129	0.0129
6	1660851	1660950	1660916	6	2	0	0.001	-1	0	-0.0049
6	1660901	1661000	1660923	5	2	0	0.001	-1	0	-0.0049
6	1663101	1663200	1663142	7	2	0	0.001	-1	0	-0.005
6	1663151	1663250	1663186	7	2	0	0.001	-1	0	-0.005
6	1663201	1663300	1663250	8	3	0.0015	0.0006	0.3959	0.0052	0.0052
6	1663251	1663350	1663294	8	4	0.0015	0.0006	0.3959	0.0051	0.0051
6	1664851	1664950	1664930	4	3	0	0.0017	-1	0	-0.0055
6	1664901	1665000	1664947	7	5	0	0.0017	-1	0	-0.0052
6	1669601	1669700	1669653	1	1	0.0006	0.0009	-0.1621	0.0055	-0.0051
6	1669651	1669750	1669653	1	1	0.0006	0.0009	-0.1621	0.0055	-0.0051
6	1675501	1675600	1675545	14	4	0.0082	0	1	0.4597	0.4593
6	1675551	1675650	1675613	15	6	0.0082	0	1	0.4597	0.459
6	1678151	1678250	1678199	5	2	0.0006	0.0009	-0.1611	0.0055	-0.0051
6	1678201	1678300	1678246	5	1	0.0006	0.0009	-0.1611	0.0055	-0.0051
6	1678251	1678350	1678321	11	2	0	0.0285	-1	0	-0.0686
6	1678301	1678400	1678350	16	4	0	0.0285	-1	0	-0.0685
6	1678351	1678450	1678398	14	5	0	0.002	-1	0	-0.005
6	1678401	1678500	1678442	12	4	0	0.002	-1	0	-0.005
6	1682701	1682800	1682751	8	2	0.0947	0.0595	0.2279	0.3347	0.3347
6	1682751	1682850	1682821	8	1	0.0947	0.0595	0.2279	0.3347	0.3347
6	1684801	1684900	1684856	18	7	0.0006	0.0009	-0.1583	0	-0.0005
6	1684851	1684950	1684889	16	6	0.0022	0.0021	0.0257	0.0006	0.0004
6	1684901	1685000	1684952	9	3	0.0015	0.0012	0.1265	0.0017	0.0017
6	1693351	1693450	1693416	3	1	0.0006	0.0009	-0.1417	0.0055	-0.0052
6	1693401	1693500	1693462	5	2	0.0006	0.0009	-0.1417	0.0055	-0.0051
6	1696201	1696300	1696250	6	1	0.0619	0.0435	0.1741	0.7761	0.7761
6	1696251	1696350	1696303	5	1	0.0619	0.0435	0.1741	0.7761	0.7761
6	1697651	1697750	1697687	2	2	0.0631	0.0445	0.1726	0.7236	0.7231
6	1697701	1697800	1697748	2	1	0.0631	0.0445	0.1726	0.7236	0.7236
6	1699451	1699550	1699488	2	1	0.0585	0.0423	0.1611	0.9319	0.9319
6	1699501	1699600	1699550	2	1	0.0585	0.0423	0.1611	0.9319	0.9319
6	1700701	1700800	1700755	5	2	0.0591	0.0419	0.1703	0.1854	0.1854
6	1700751	1700850	1700777	4	2	0.0591	0.0419	0.1703	0.1854	0.1854
6	1705001	1705100	1705067	5	1	0.0007	0.0009	-0.1413	0.0056	-0.0052
6	1705051	1705150	1705091	6	2	0.0007	0.0009	-0.1413	0	-0.0016
6	1725451	1725550	1725508	2	1	0.0007	0.0008	-0.1227	0.0055	-0.0052
6	1725501	1725600	1725559	2	1	0.0007	0.0008	-0.1227	0.0055	-0.0052
6	1725951	1726050	1726028	1	1	0.0007	0.0008	-0.1199	0.0055	-0.0052
6	1726001	1726100	1726050	2	1	0.0007	0.0008	-0.1199	0.0055	-0.0052
6	1727901	1728000	1727981	1	1	0.0006	0.0009	-0.1447	0.0055	-0.0051
6	1727951	1728050	1728004	2	1	0.0006	0.0009	-0.1447	0.0055	-0.0051
6	1733951	1734050	1734004	10	4	0.0034	0.0043	-0.1136	0	-0.0058
6	1734001	1734100	1734020	8	5	0.0034	0.0043	-0.1136	0	-0.0053
6	1740101	1740200	1740166	4	2	0.0007	0.0008	-0.0859	0	-0.0013
6	1740151	1740250	1740182	3	1	0.0007	0.0008	-0.0859	0.0055	-0.0053
6	1745501	1745600	1745561	9	2	0	0.0028	-1	0	-0.0283
6	1745551	1745650	1745585	9	2	0	0.0028	-1	0	-0.0283
6	1746551	1746650	1746601	9	2	0	0.0028	-1	0	-0.0281
6	1746601	1746700	1746636	5	1	0	0.0028	-1	0	-0.0281
6	1746651	1746750	1746706	4	1	0	0.0027	-1	0	-0.0285
6	1746701	1746800	1746747	8	2	0	0.0027	-1	0	-0.0283
6	1748101	1748200	1748147	14	4	0	0	-1	0	-0.1725
6	1748151	1748250	1748204	19	4	0	0	-1	0	-0.1479
6	1748301	1748400	1748358	10	2	0	0.0028	-1	0	-0.0238
6	1748351	1748450	1748400	9	1	0	0.0028	-1	0	-0.0284
6	1750151	1750250	1750218	5	3	0	0.0018	-1	0	-0.0111
6	1750201	1750300	1750241	6	3	0	0.0018	-1	0	-0.0048
6	1750801	1750900	1750851	5	3	0	0.0018	-1	0	-0.0056
6	1750851	1750950	1750873	3	2	0	0.0018	-1	0	-0.0056
6	1751351	1751450	1751434	2	1	0	0.0009	-1	0	-0.0056
6	1751401	1751500	1751441	3	1	0	0.0009	-1	0	-0.0056
6	1755301	1755400	1755378	2	1	0.0002	0	1	0.012	0.012
6	1755351	1755450	1755398	3	1	0.0002	0	1	0.012	0.012
6	1760501	1760600	1760559	10	5	0.0002	0	1	0.0081	0.0081
6	1760551	1760650	1760576	8	3	0.0002	0	1	0.0081	0.0081
6	1760601	1760700	1760655	3	1	0.0001	0	1	0.0081	0.0081
6	1760651	1760750	1760709	7	3	0.0001	0	1	0.0081	0.008
6	1764301	1764400	1764346	3	1	0	0.0009	-1	0	-0.0057
6	1764351	1764450	1764384	1	1	0	0.0009	-1	0	-0.0057
6	1764501	1764600	1764544	5	2	0.0001	0	1	0.008	0.008
6	1764551	1764650	1764586	3	1	0.0001	0	1	0.008	0.008
6	1768651	1768750	1768717	9	1	0.0001	0	1	0.008	0.008
6	1768701	1768800	1768746	8	1	0.0001	0	1	0.008	0.008
6	1779001	1779100	1779049	19	2	0.0002	0	1	0.0118	0.0118
6	1779051	1779150	1779102	19	2	0.0002	0	1	0.012	0.0046
6	1779601	1779700	1779659	25	3	0	0	-1	0	-0.2399
6	1779651	1779750	1779688	20	2	0	0	-1	0	-0.4235
6	1779701	1779800	1779739	9	1	0	0	-1	0	-0.5531
6	1779751	1779850	1779794	9	2	0	0	-1	0	-0.0553
6	1782051	1782150	1782099	10	1	0	0.0012	-1	0	-0.0162
6	1782101	1782200	1782144	7	1	0	0.0012	-1	0	-0.0162
6	1784251	1784350	1784303	7	2	0.0004	0	1	0.0196	0.0196
6	1784301	1784400	1784332	3	1	0.0004	0	1	0.02	0.02
6	1791701	1791800	1791759	8	4	0	0.0004	-1	0	-0.025
6	1791751	1791850	1791799	8	4	0.0003	0.0004	-0.0707	0	-0.0018
6	1791801	1791900	1791848	4	2	0.0003	0	1	0.0161	0.0161
6	1792151	1792250	1792213	6	1	0.0003	0	1	0.0161	0.0161
6	1792201	1792300	1792223	5	1	0.0003	0	1	0.0161	0.0161
6	1792501	1792600	1792573	7	2	0.0003	0	1	0.0073	0.0073
6	1792551	1792650	1792591	7	1	0.0003	0	1	0.016	0.016
6	1792701	1792800	1792760	4	3	0.003	0	1	0.1519	0.1517
6	1792751	1792850	1792798	4	2	0.003	0	1	0.152	0.1519
6	1794251	1794350	1794320	4	1	0.0004	0	1	0.0202	0.0202
6	1794301	1794400	1794345	7	2	0.0004	0	1	0.0202	0.0201
6	1794501	1794600	1794565	7	1	0.0002	0	1	0.016	0.016
6	1794551	1794650	1794594	7	2	0.0002	0	1	0.0159	0.0159
6	1795701	1795800	1795755	10	2	0.0003	0	1	0.02	0.02
6	1795751	1795850	1795791	5	2	0.0003	0	1	0.02	0.02
6	1815201	1815300	1815250	8	2	0.0003	0	1	0.0045	0.0045
6	1815251	1815350	1815311	10	2	0.0003	0	1	0.02	0.0199
6	1817401	1817500	1817462	6	1	0.0058	0.0009	0.7241	0.1068	0.1068
6	1817451	1817550	1817500	7	1	0.0058	0.0009	0.7241	0.1068	0.1068
6	1817501	1817600	1817542	5	1	0.0003	0.0006	-0.2381	0.0206	-0.0204
6	1817551	1817650	1817608	4	1	0.0003	0.0006	-0.2381	0.0206	-0.0204
6	1823251	1823350	1823306	3	1	0.0003	0.0005	-0.2066	0.0206	-0.0204
6	1823301	1823400	1823340	3	1	0.0003	0.0005	-0.2066	0.0206	-0.0204
6	1859501	1859600	1859549	2	1	0.0005	0.0005	-0.0046	0.0206	-0.0206
6	1859551	1859650	1859602	3	3	0.0005	0.0005	-0.0046	0	-0.0008
6	1860451	1860550	1860506	4	2	0.0056	0.0018	0.5135	0.0902	0.0902
6	1860501	1860600	1860545	6	3	0.0112	0.0036	0.5135	0.09	0.09
6	1860551	1860650	1860589	4	1	0.0057	0.0018	0.5135	0.0898	0.0898
6	1860951	1861050	1861000	7	3	0.0005	0.0005	-0.0069	0	-0.0047
6	1861001	1861100	1861050	7	3	0.0081	0.003	0.464	0.0661	0.0656
6	1861051	1861150	1861082	3	1	0.0076	0.0024	0.5135	0.0664	0.0664
6	1861201	1861300	1861268	3	1	0.0072	0.0022	0.5238	0.0753	0.0753
6	1861251	1861350	1861289	5	2	0.0141	0.0045	0.5187	0.0741	0.0741
6	1861301	1861400	1861319	2	1	0.0069	0.0022	0.5135	0.0729	0.0729
6	1865201	1865300	1865228	4	1	0.0073	0.0024	0.5119	0.0689	0.0689
6	1865251	1865350	1865318	2	1	0.0073	0.0024	0.5119	0.0689	0.0689
6	1865751	1865850	1865791	6	2	0.015	0.0048	0.5127	0.067	0.067
6	1865801	1865900	1865836	4	2	0.015	0.0048	0.5127	0.067	0.067
6	1866701	1866800	1866734	4	1	0.0005	0.0007	-0.1094	0.0249	-0.0247
6	1866751	1866850	1866811	3	1	0.0005	0.0007	-0.1094	0.0249	-0.0247
6	1867201	1867300	1867238	3	1	0.0006	0.0006	-0.0515	0.0247	-0.0246
6	1867251	1867350	1867274	1	1	0.0006	0.0006	-0.0515	0.0247	-0.0246
6	1867351	1867450	1867389	15	2	0.0056	0.0018	0.5119	0.0911	0.0911
6	1867401	1867500	1867457	12	1	0.0056	0.0018	0.5119	0.0911	0.0911
6	1867701	1867800	1867746	2	2	0.0005	0.0005	-0.0069	0.0251	-0.0174
6	1867751	1867850	1867815	5	1	0.0005	0.0005	-0.0069	0.0206	-0.0205
6	1873301	1873400	1873356	9	1	0.0005	0.0005	-0.0515	0.0206	-0.0205
6	1873351	1873450	1873406	9	2	0.0005	0.0005	-0.0515	0	-0.0062
6	1874251	1874350	1874316	2	1	0.0005	0.0005	-0.0515	0.0207	-0.0207
6	1874301	1874400	1874353	3	2	0.0005	0.0005	-0.0515	0.0213	-0.0201
6	1876651	1876750	1876726	4	2	0.002	0.0007	0.5102	0.2698	0.2688
6	1876701	1876800	1876745	4	2	0.002	0.0007	0.5102	0.2698	0.2688
6	1877651	1877750	1877718	3	1	0.0021	0.0025	-0.0977	0.0987	-0.0982
6	1877701	1877800	1877752	6	1	0.0021	0.0025	-0.0977	0.0987	-0.0982
6	1892001	1892100	1892078	6	3	0.0005	0.0005	-0.0069	0	-0.0003
6	1892051	1892150	1892078	6	3	0.0005	0.0005	-0.0069	0	-0.0003
6	1892201	1892300	1892266	6	1	0.0005	0.0005	-0.0446	0.0207	-0.0207
6	1892251	1892350	1892278	5	1	0.0005	0.0005	-0.0446	0.0207	-0.0207
6	1892501	1892600	1892540	14	6	0.0036	0.0012	0.5135	0.0204	0.0204
6	1892551	1892650	1892597	9	6	0.0036	0.0012	0.5135	0.0249	0.0249
6	1892901	1893000	1892946	6	2	0	0.0008	-1	0	-0.1105
6	1892951	1893050	1892996	4	3	0	0.0008	-1	0	-0.0199
6	1893001	1893100	1893056	6	4	0.0071	0.0023	0.5119	0.0675	0.0675
6	1893051	1893150	1893106	8	3	0.0071	0.0023	0.5119	0.0252	0.0252
6	1893851	1893950	1893921	8	3	0.0036	0.0012	0.5119	0.1389	0.1371
6	1893901	1894000	1893948	10	3	0.0073	0.0024	0.5127	0.142	0.1411
6	1893951	1894050	1894002	4	1	0.0037	0.0012	0.5135	0.1405	0.1405
6	1894301	1894400	1894343	3	2	0.0004	0.0004	-0.0655	0	-0.0022
6	1894351	1894450	1894405	5	1	0.0004	0.0004	-0.0655	0.0165	-0.0164
6	1898901	1899000	1898972	11	7	0.0287	0.0203	0.1698	0.1373	0.1372
6	1898951	1899050	1898987	11	5	0.0287	0.0203	0.1698	0.224	0.2239
6	1909251	1909350	1909334	3	1	0.0032	0.001	0.5135	0.1635	0.1635
6	1909301	1909400	1909342	4	2	0.0032	0.001	0.5135	0.1635	0.1633
6	1914501	1914600	1914549	11	6	0.0005	0.0005	-0.0423	0	-0.0009
6	1914551	1914650	1914592	10	2	0.0005	0.0005	-0.0423	0	-0.0026
6	1914601	1914700	1914628	5	1	0.0005	0.0005	-0.021	0.0206	-0.0205
6	1914651	1914750	1914660	1	1	0.0005	0.0005	-0.021	0.0206	-0.0205
6	1915301	1915400	1915357	3	2	0.0004	0.0005	-0.0909	0.0212	-0.0199
6	1915351	1915450	1915378	2	1	0.0004	0.0005	-0.0909	0.0206	-0.0205
6	1915701	1915800	1915782	3	3	0.0004	0.0005	-0.0816	0.5133	-0.0105
6	1915751	1915850	1915799	5	3	0.0004	0.0005	-0.0816	0.5133	-0.0105
6	1923851	1923950	1923931	6	2	0.0022	0.003	-0.1433	0.0207	-0.0196
6	1923901	1924000	1923948	7	2	0.0022	0.003	-0.1433	0.0207	-0.0196
6	1924301	1924400	1924370	3	2	0.0277	0.0208	0.1427	0.857	0.857
6	1924351	1924450	1924370	3	2	0.0277	0.0208	0.1427	0.857	0.857
6	1924651	1924750	1924701	7	2	0.0028	0.0036	-0.131	0	-0.0091
6	1924701	1924800	1924748	6	1	0.0028	0.0036	-0.131	0.0257	-0.0244
6	1930351	1930450	1930416	3	2	0.0028	0.004	-0.1766	0.0264	-0.0245
6	1930401	1930500	1930456	4	4	0.0028	0.004	-0.1766	0.0375	-0.0192
6	1930801	1930900	1930849	7	1	0.0028	0.0041	-0.1916	0.0267	-0.0245
6	1930851	1930950	1930901	7	1	0.0028	0.0041	-0.1916	0.0267	-0.0245
6	1932951	1933050	1932985	5	1	0.0023	0.0032	-0.1588	0.0211	-0.0197
6	1933001	1933100	1933049	4	1	0.0023	0.0032	-0.1588	0.0211	-0.0197
6	1933501	1933600	1933534	10	6	0.0034	0.0049	-0.1908	0	-0.0125
6	1933551	1933650	1933622	5	1	0.0034	0.0049	-0.1908	0.0323	-0.0297
6	1933701	1933800	1933746	6	2	0.0017	0.0025	-0.1818	0.0161	-0.0149
6	1933751	1933850	1933798	3	1	0.0017	0.0025	-0.1818	0.0161	-0.0149
6	1934251	1934350	1934299	8	5	0.0106	0.015	-0.173	0.0254	-0.0235
6	1934301	1934400	1934358	8	6	0.0106	0.015	-0.173	0.0254	-0.0235
6	1934351	1934450	1934405	10	7	0.0034	0.0047	-0.1668	0.0961	-0.0182
6	1934401	1934500	1934426	7	5	0.0034	0.0047	-0.1668	0.0961	-0.0182
6	1935751	1935850	1935804	8	1	0.0332	0.0209	0.2279	0.6742	0.6742
6	1935801	1935900	1935837	7	1	0.0332	0.0209	0.2279	0.6742	0.6742
6	1935901	1936000	1935952	8	2	0.0034	0.0047	-0.1668	0.0443	-0.0233
6	1935951	1936050	1935988	7	2	0.0034	0.0047	-0.1668	0.0443	-0.0233
6	1937851	1937950	1937908	2	1	0.0064	0.002	0.5135	0.0794	0.0794
6	1937901	1938000	1937954	2	2	0.0064	0.002	0.5135	0.0793	0.0793
6	1938551	1938650	1938606	4	1	0.0004	0.0004	-0.021	0.0165	-0.0164
6	1938601	1938700	1938638	2	1	0.0004	0.0004	-0.021	0.0165	-0.0164
6	1939201	1939300	1939242	3	2	0.0068	0.0021	0.5238	0.0785	0.0785
6	1939251	1939350	1939292	2	2	0.0068	0.0021	0.5238	0.0791	0.0791
6	1941151	1941250	1941194	3	1	0.0067	0.0022	0.5119	0.0752	0.0752
6	1941201	1941300	1941217	1	1	0.0067	0.0022	0.5119	0.0752	0.0752
6	1945801	1945900	1945895	2	1	0.0067	0.0021	0.5205	0.0802	0.0802
6	1945851	1945950	1945895	2	1	0.0067	0.0021	0.5205	0.0802	0.0802
6	1946651	1946750	1946688	5	3	0.0006	0.0006	0	0	0
6	1946701	1946800	1946707	3	2	0.0006	0.0006	0	0	0
6	1947001	1947100	1947046	4	2	0.0066	0.0021	0.5119	0.0759	0.0759
6	1947051	1947150	1947079	3	1	0.0066	0.0021	0.5119	0.0759	0.0759
6	1947301	1947400	1947365	4	3	0.0004	0.0004	0	0	0
6	1947351	1947450	1947365	4	3	0.0004	0.0004	0	0	0
6	1949601	1949700	1949666	4	1	0.0293	0.0201	0.1856	0.746	0.746
6	1949651	1949750	1949693	4	2	0.0293	0.0201	0.1856	0.746	0.7275
6	1950101	1950200	1950145	5	1	0.0005	0.0005	-0.0492	0.0206	-0.0205
6	1950151	1950250	1950172	2	1	0.0005	0.0005	-0.0492	0.0206	-0.0205
6	1950551	1950650	1950642	4	2	0.0065	0.0021	0.5119	0.0771	0.0771
6	1950601	1950700	1950665	9	7	0.0065	0.0021	0.5119	0.0771	0.077
6	1950801	1950900	1950856	2	2	0.0067	0.0022	0.5135	0.0754	0.0754
6	1950851	1950950	1950894	1	1	0.0067	0.0022	0.5135	0.0754	0.0754
6	1952451	1952550	1952508	11	1	0.0005	0.0005	-0.0538	0.0206	-0.0205
6	1952501	1952600	1952535	7	1	0.0005	0.0005	-0.0538	0.0206	-0.0205
6	1953351	1953450	1953432	7	2	0.0112	0.0035	0.5238	0.0409	0.0409
6	1953401	1953500	1953432	7	2	0.0112	0.0035	0.5238	0.0409	0.0409
6	1955701	1955800	1955778	1	1	0.0003	0.0003	-0.0469	0.0124	-0.0124
6	1955751	1955850	1955778	1	1	0.0003	0.0003	-0.0469	0.0124	-0.0124
6	1956301	1956400	1956357	19	5	0.0255	0.0366	-0.1785	0	-0.1165
6	1956351	1956450	1956394	18	4	0.0255	0.0366	-0.1785	0	-0.0853
6	1958301	1958400	1958369	6	2	0.0017	0.0024	-0.1766	0.0196	-0.0125
6	1958351	1958450	1958403	8	5	0.0063	0.0039	0.237	0.0697	0.0186
6	1958401	1958500	1958465	13	8	0.0061	0.0025	0.4169	0.0326	0.0323
6	1958451	1958550	1958491	12	5	0.0043	0.005	-0.0726	0.0537	-0.0089
6	1958501	1958600	1958518	3	1	0.0028	0.004	-0.166	0.0264	-0.0246
6	1958701	1958800	1958767	1	1	0.0002	0.0002	-0.0977	0.0082	-0.0082
6	1958751	1958850	1958767	1	1	0.0002	0.0002	-0.0977	0.0082	-0.0082
6	1959001	1959100	1959061	5	2	0.0036	0.0048	-0.1507	0.1898	-0.1849
6	1959051	1959150	1959102	4	1	0.0036	0.0048	-0.1507	0.188	-0.1867
6	1959751	1959850	1959824	4	3	0.0311	0.0221	0.1698	0.0759	0.0759
6	1959801	1959900	1959864	6	3	0.0311	0.0221	0.1698	0.1384	0.1384
6	1960001	1960100	1960042	9	2	0.0319	0.0223	0.1777	0.1449	0.1449
6	1960051	1960150	1960113	10	2	0.0319	0.0223	0.1777	0.2434	0.2434
6	1960101	1960200	1960142	12	5	0.0538	0.0436	0.1043	0.1783	0.1783
6	1960151	1960250	1960191	8	7	0.1099	0.0885	0.1077	0.4508	0.4508
6	1960201	1960300	1960250	7	3	0.0561	0.0449	0.111	0.6151	0.6151
6	1960351	1960450	1960414	6	1	0.0311	0.0221	0.17	0.7955	0.7955
6	1960401	1960500	1960456	12	3	0.0311	0.0221	0.17	0.1273	0.1273
6	1961651	1961750	1961724	2	2	0.0311	0.0221	0.1698	0.7625	0.7625
6	1961701	1961800	1961741	3	3	0.0313	0.0223	0.1681	1.034	0.6008
6	1961751	1961850	1961773	1	1	0.0002	0.0002	-0.0633	0.0082	-0.0082
6	1963851	1963950	1963920	7	2	0.0002	0.0002	-0.0469	0	-0.0003
6	1963901	1964000	1963951	12	3	0.0002	0.0002	-0.0469	0	-0.0002
6	1964151	1964250	1964228	7	2	0.0002	0.0002	-0.0977	0	-0.0011
6	1964201	1964300	1964256	10	4	0.0002	0.0002	-0.0977	0	-0.0004
6	1964451	1964550	1964497	11	4	0.0006	0.0006	-0.0515	0	-0.001
6	1964501	1964600	1964544	7	4	0.0006	0.0006	-0.0515	0	-0.0007
6	1966901	1967000	1966949	7	3	0	0.0019	-1	0	-0.0393
6	1966951	1967050	1966992	5	2	0	0.0019	-1	0	-0.0402
6	1968801	1968900	1968874	1	1	0.0002	0.0002	-0.0469	0.0082	-0.0082
6	1968851	1968950	1968894	2	1	0.0002	0.0002	-0.0469	0.0082	-0.0082
6	1972051	1972150	1972123	3	2	0.0006	0.0002	0.5176	0.0082	0.0082
6	1972101	1972200	1972140	5	2	0.0006	0.0002	0.5176	0.0082	0.0082
6	1972351	1972450	1972408	8	2	0.0004	0.0004	-0.0717	0.0082	-0.0082
6	1972401	1972500	1972430	6	2	0.0004	0.0004	-0.0717	0.0082	-0.0082
6	1973551	1973650	1973590	2	1	0.0006	0.0002	0.5045	0.0082	0.0082
6	1973601	1973700	1973646	3	1	0.0006	0.0002	0.5045	0.0082	0.0082
6	1973651	1973750	1973695	4	1	0.0002	0.0002	-0.021	0.0082	-0.0082
6	1973701	1973800	1973726	2	1	0.0002	0.0002	-0.021	0.0082	-0.0082
6	1974601	1974700	1974660	1	1	0.0002	0.0002	-0.0977	0.0082	-0.0082
6	1974651	1974750	1974660	1	1	0.0002	0.0002	-0.0977	0.0082	-0.0082
6	1980951	1981050	1980989	4	2	0.0006	0.0002	0.5063	0.0082	0.0082
6	1981001	1981100	1981020	2	1	0.0006	0.0002	0.5063	0.0082	0.0082
6	1981151	1981250	1981230	2	2	0.0009	0.0003	0.5099	0.0068	0.0068
6	1981201	1981300	1981249	4	2	0.0009	0.0003	0.5099	0.0068	0.0068
6	1985701	1985800	1985758	3	1	0.0009	0.0003	0.514	0.0123	0.0123
6	1985751	1985850	1985811	3	1	0.0009	0.0003	0.514	0.0123	0.0123
6	1986451	1986550	1986517	7	3	0.0006	0.0002	0.4957	0.0032	0.0032
6	1986501	1986600	1986547	9	2	0.0006	0.0002	0.4957	0.0082	0.0078
6	1986951	1987050	1986987	6	1	0.0055	0.0018	0.5135	0.0931	0.0931
6	1987001	1987100	1987056	10	3	0.0114	0.0054	0.3551	0.0468	0.0468
6	1987051	1987150	1987107	17	6	0.0066	0.0039	0.2578	0.0126	0.0126
6	1987101	1987200	1987148	16	5	0.0006	0.0002	0.5063	0.0033	0.0033
6	1987151	1987250	1987192	11	2	0.0055	0.0018	0.5119	0.0918	0.0918
6	1987201	1987300	1987226	7	2	0.0055	0.0018	0.5119	0.093	0.093
6	1995351	1995450	1995410	7	4	0.0051	0.0057	-0.0515	0	-0.0065
6	1995401	1995500	1995425	5	3	0.0051	0.0057	-0.0515	0	-0.0066
6	2000601	2000700	2000661	1	1	0.0006	0.0002	0.4945	0.0082	0.0082
6	2000651	2000750	2000705	2	1	0.0006	0.0002	0.4945	0.0082	0.0082
6	2001301	2001400	2001354	4	3	0.0002	0.0002	-0.1485	0	-0.0011
6	2001351	2001450	2001372	3	2	0.0002	0.0002	-0.1485	0.0083	-0.0081
6	2001501	2001600	2001569	5	2	0.0001	0.0002	-0.2044	0	-0.0014
6	2001551	2001650	2001587	6	2	0.0001	0.0002	-0.2044	0	-0.0014
6	2001951	2002050	2002042	1	1	0.0001	0.0002	-0.2222	0.0082	-0.0081
6	2002001	2002100	2002075	4	2	0.0003	0.0004	-0.2156	0.0082	-0.0081
6	2002051	2002150	2002086	3	1	0.0001	0.0002	-0.2088	0.0082	-0.0081
6	2002151	2002250	2002207	2	1	0.0006	0.0002	0.5045	0.0082	0.0082
6	2002201	2002300	2002207	2	1	0.0006	0.0002	0.5045	0.0082	0.0082
6	2003601	2003700	2003660	4	2	0.0002	0.0002	-0.0515	0.0084	-0.008
6	2003651	2003750	2003676	3	2	0.0002	0.0002	-0.0515	0.0084	-0.008
6	2004201	2004300	2004234	3	1	0.0002	0.0002	-0.1094	0.0082	-0.0082
6	2004251	2004350	2004274	1	1	0.0002	0.0002	-0.1094	0.0082	-0.0082
6	2010851	2010950	2010949	1	1	0.0002	0.0002	-0.0538	0.0083	-0.0083
6	2010901	2011000	2010970	2	2	0.0002	0.0002	-0.0538	0.0083	-0.0083
6	2014501	2014600	2014565	1	1	0.0002	0.0002	-0.0515	0.0083	-0.0083
6	2014551	2014650	2014565	1	1	0.0002	0.0002	-0.0515	0.0083	-0.0083
6	2015151	2015250	2015247	1	1	0.0002	0.0002	-0.1139	0.0082	-0.0082
6	2015201	2015300	2015269	2	1	0.0002	0.0002	-0.1139	0.0082	-0.0082
6	2015651	2015750	2015697	9	2	0.0002	0.0002	-0.1578	0	-0.0008
6	2015701	2015800	2015758	7	2	0.0004	0.0005	-0.1509	0.0103	-0.0102
6	2015751	2015850	2015795	7	3	0.0002	0.0003	-0.1462	0.0136	-0.0111
6	2018001	2018100	2018059	12	1	0.0001	0.0002	-0.2222	0.0082	-0.0081
6	2018051	2018150	2018098	15	2	0.0001	0.0002	-0.2222	0.0082	-0.0081
6	2019851	2019950	2019909	5	2	0.0003	0.0003	-0.1	0.0125	-0.0121
6	2019901	2020000	2019950	6	3	0.0003	0.0003	-0.1	0.0127	-0.0119
6	2021001	2021100	2021072	4	2	0.0002	0.0002	-0.0069	0.0082	-0.0009
6	2021051	2021150	2021072	4	2	0.0002	0.0002	-0.0069	0.0082	-0.0009
6	2021401	2021500	2021448	17	5	0.0076	0.0012	0.7241	0.0805	0.0805
6	2021451	2021550	2021494	12	4	0.0076	0.0012	0.7241	0.0806	0.0806
6	2025551	2025650	2025620	3	1	0.0002	0.0003	-0.2088	0.0124	-0.0123
6	2025601	2025700	2025637	2	1	0.0002	0.0003	-0.2088	0.0124	-0.0123
6	2028601	2028700	2028662	4	3	0.0003	0.0003	-0.0492	0	-0.0008
6	2028651	2028750	2028670	3	3	0.0003	0.0003	-0.0492	0	-0.0008
6	2029551	2029650	2029610	2	1	0.0002	0.0002	-0.0469	0.0082	-0.0082
6	2029601	2029700	2029610	2	1	0.0002	0.0002	-0.0469	0.0082	-0.0082
6	2031101	2031200	2031130	5	1	0.0003	0.0003	-0.0655	0.0123	-0.0123
6	2031151	2031250	2031188	2	1	0.0003	0.0003	-0.0655	0.0123	-0.0123
6	2039751	2039850	2039822	2	1	0.0002	0.0002	-0.0977	0.0083	-0.0082
6	2039801	2039900	2039822	2	1	0.0002	0.0002	-0.0977	0.0083	-0.0082
6	2039901	2040000	2039996	2	2	0	0	-1	0	-0.0446
6	2039951	2040050	2040022	6	2	0	0	-1	0	-0.0446
6	2042951	2043050	2043014	9	4	0.0009	0.0003	0.4859	0.0045	0.0045
6	2043001	2043100	2043040	10	4	0.0009	0.0003	0.4859	0.0045	0.0045
6	2058501	2058600	2058553	1	1	0	0.0002	-1	0	-0.0214
6	2058551	2058650	2058613	5	5	0	0.0002	-1	0	-0.0038
6	2073151	2073250	2073206	11	3	0.0334	0.0212	0.2241	0.4944	0.488
6	2073201	2073300	2073234	8	1	0.0334	0.0212	0.2241	0.7984	0.7984
6	2076301	2076400	2076368	18	6	0.0052	0.0048	0.0388	0.0116	0.0116
6	2076351	2076450	2076397	20	5	0.0052	0.0048	0.0388	0.0116	0.0116
6	2090351	2090450	2090429	4	1	0.0086	0.0028	0.5135	0.0584	0.0584
6	2090401	2090500	2090466	8	2	0.0086	0.0028	0.5135	0.0584	0.0584
6	2092051	2092150	2092092	4	1	0.0048	0.0016	0.5119	0.106	0.106
6	2092101	2092200	2092151	4	1	0.0048	0.0016	0.5119	0.106	0.106
6	2093201	2093300	2093262	4	1	0.0049	0.0016	0.5135	0.1038	0.1038
6	2093251	2093350	2093304	11	2	0.0049	0.0016	0.5135	0.0398	0.0398
6	2093351	2093450	2093416	5	2	0.0003	0.0001	0.5158	0.0021	0.0021
6	2093401	2093500	2093440	6	2	0.0003	0.0001	0.5158	0.0021	0.0021
6	2093551	2093650	2093600	4	1	0.0049	0.0016	0.5135	0.1038	0.1038
6	2093601	2093700	2093667	3	1	0.0049	0.0016	0.5135	0.1038	0.1038
6	2100951	2101050	2101008	11	2	0.0001	0.0001	-0.0023	0	-0.0007
6	2101001	2101100	2101037	9	2	0.0001	0.0001	-0.0023	0	-0.0007
6	2113401	2113500	2113464	4	1	0.0001	0.0001	-0.0446	0.0042	-0.0042
6	2113451	2113550	2113485	4	1	0.0001	0.0001	-0.0446	0.0042	-0.0042
6	2113751	2113850	2113784	6	3	0.0003	0.0003	-0.0485	0.0063	-0.0061
6	2113801	2113900	2113827	4	2	0.0003	0.0003	-0.0485	0.0062	-0.0062
6	2114151	2114250	2114220	2	2	0.0001	0.0001	0	0	0
6	2114201	2114300	2114250	5	2	0.0001	0.0001	0	0	0
6	2114451	2114550	2114528	2	1	0.0083	0.0027	0.5135	0.0603	0.0603
6	2114501	2114600	2114558	4	1	0.0083	0.0027	0.5135	0.0603	0.0603
6	2114851	2114950	2114923	3	3	0.0001	0.0001	0.0343	0	0
6	2114901	2115000	2114944	6	4	0.0001	0.0001	0.0343	0	0
6	2115301	2115400	2115336	3	2	0.0001	0.0001	0.0343	0.0041	0.004
6	2115351	2115450	2115392	2	1	0.0001	0.0001	0.0343	0.0041	0.0041
6	2115451	2115550	2115498	5	2	0.0001	0.0001	0	0	0
6	2115501	2115600	2115555	4	3	0.0002	0.0002	-0.0455	0.0041	-0.0041
6	2115551	2115650	2115606	4	3	0.0001	0.0001	-0.0955	0.0041	-0.0041
6	2115651	2115750	2115715	5	2	0.0001	0.0001	-0.0731	0.0041	-0.0023
6	2115701	2115800	2115742	6	2	0.0001	0.0001	-0.0731	0.0041	-0.0041
6	2119751	2119850	2119822	16	5	0.0141	0.0044	0.5222	0.0589	0.0589
6	2119801	2119900	2119850	24	8	0.0277	0.0227	0.0977	0.0177	0.017
6	2119851	2119950	2119901	19	7	0.0136	0.0183	-0.1487	0	-0.0278
6	2119901	2120000	2119941	14	7	0.0136	0.0044	0.5119	0.0564	0.0545
6	2119951	2120050	2120010	13	7	0.0204	0.0066	0.5124	0.0609	0.0596
6	2120001	2120100	2120049	14	7	0.0068	0.0022	0.5135	0.0447	0.0416
6	2120051	2120150	2120098	12	5	0.0124	0.0039	0.5222	0.0365	0.036
6	2120101	2120200	2120131	7	2	0.0124	0.0039	0.5222	0.0365	0.0365
6	2120551	2120650	2120628	2	1	0	0.0107	-1	0	-0.2667
6	2120601	2120700	2120646	4	1	0	0.0107	-1	0	-0.2667
6	2120851	2120950	2120910	6	3	0	0.0006	-1	0	-0.0086
6	2120901	2121000	2120926	4	2	0	0.0006	-1	0	-0.0086
6	2121301	2121400	2121362	10	1	0.0001	0.0001	0.0937	0.0041	0.0041
6	2121351	2121450	2121410	18	4	0.0001	0.0001	0.0937	0.0029	0.0028
6	2122651	2122750	2122699	9	5	0	0.0006	-1	0	-0.0037
6	2122701	2122800	2122748	7	3	0	0.0006	-1	0	-0.0054
6	2125701	2125800	2125769	8	4	0.0052	0.0025	0.3474	0.0209	0.0209
6	2125751	2125850	2125799	12	5	0.0052	0.0025	0.3474	0.016	0.016
6	2127001	2127100	2127044	8	2	0.0054	0.0049	0.0458	0.0021	0.0021
6	2127051	2127150	2127111	8	3	0.0054	0.0049	0.0458	0.0021	0.0021
6	2127751	2127850	2127824	14	4	0.0076	0.0037	0.3455	0.025	0.025
6	2127801	2127900	2127845	20	6	0.0076	0.0037	0.3455	0.021	0.021
6	2127951	2128050	2128009	20	4	0.0076	0.0037	0.3474	0.0266	0.0266
6	2128001	2128100	2128043	19	6	0.0076	0.0037	0.3474	0.021	0.021
6	2129351	2129450	2129399	9	5	0.0004	0.0002	0.3474	0.002	0.002
6	2129401	2129500	2129468	12	7	0.0166	0.0079	0.3516	0.0275	0.0275
6	2129451	2129550	2129508	16	6	0.0242	0.0117	0.349	0.0389	0.0389
6	2129501	2129600	2129547	12	4	0.008	0.0039	0.3435	0.0267	0.0267
6	2130351	2130450	2130411	3	3	0	0.0002	-1	0	-0.3737
6	2130401	2130500	2130451	4	3	0	0.0002	-1	0	-0.4163
6	2131851	2131950	2131895	8	3	0	0.0015	-1	0	-0.008
6	2131901	2132000	2131953	7	3	0	0.0015	-1	0	-0.008
6	2132001	2132100	2132054	14	4	0	0.0014	-1	0	-0.0137
6	2132051	2132150	2132099	18	7	0	0.0081	-1	0	-0.0159
6	2132101	2132200	2132139	12	6	0	0.0067	-1	0	-0.0076
6	2132351	2132450	2132424	3	1	0	0.0015	-1	0	-0.0132
6	2132401	2132500	2132462	8	3	0	0.0015	-1	0	-0.0108
6	2132701	2132800	2132750	4	2	0	0.0023	-1	0	-0.0085
6	2132751	2132850	2132801	5	3	0	0.0023	-1	0	-0.0085
6	2133351	2133450	2133410	3	1	0.0001	0	1	0.004	0.004
6	2133401	2133500	2133446	3	1	0.0001	0	1	0.004	0.004
6	2140601	2140700	2140685	2	1	0.0001	0	1	0.004	0.004
6	2140651	2140750	2140718	6	1	0.0001	0	1	0.004	0.004
6	2141351	2141450	2141390	6	4	0	0.0001	-1	0	-0.334
6	2141401	2141500	2141460	4	2	0	0.0001	-1	0	-0.3888
6	2145401	2145500	2145488	4	2	0	0.0013	-1	0	-0.0101
6	2145451	2145550	2145494	5	3	0	0.0013	-1	0	-0.0101
6	2151601	2151700	2151682	1	1	0.0041	0	1	0.2258	0.2258
6	2151651	2151750	2151682	1	1	0.0041	0	1	0.2258	0.2258
6	2154751	2154850	2154818	7	4	0.1482	0.0058	0.9251	0.2308	0.2308
6	2154801	2154900	2154844	7	3	0.1482	0.0058	0.9251	0.2461	0.2461
6	2181651	2181750	2181702	11	1	0	0.0015	-1	0	-0.013
6	2181701	2181800	2181734	7	1	0	0.0015	-1	0	-0.013
6	2183751	2183850	2183795	12	6	0	0.0008	-1	0	-0.0075
6	2183801	2183900	2183865	11	4	0	0.0008	-1	0	-0.0113
6	2185251	2185350	2185308	10	1	0	0.0001	-1	0	-0.0922
6	2185301	2185400	2185352	13	2	0	0.0001	-1	0	-0.0005
6	2185951	2186050	2186006	11	4	0	0.0006	-1	0	-0.0136
6	2186001	2186100	2186043	11	5	0	0.0006	-1	0	-0.004
6	2187401	2187500	2187438	11	2	0.1945	0.0101	0.9015	0.3656	0.3656
6	2187451	2187550	2187494	7	3	0.1945	0.0101	0.9015	0.3005	0.3005
6	2189851	2189950	2189890	9	5	0.0001	0	1	0.002	0.002
6	2189901	2190000	2189950	9	1	0.0001	0	1	0.0081	0.0081
6	2197051	2197150	2197089	4	1	0.0082	0	1	0.528	0.528
6	2197101	2197200	2197140	3	1	0.0082	0	1	0.528	0.528
6	2198301	2198400	2198379	4	1	0.006	0	1	0.336	0.336
6	2198351	2198450	2198398	8	1	0.006	0	1	0.336	0.336
6	2204051	2204150	2204098	13	7	0	0.0012	-1	0	-0.0066
6	2204101	2204200	2204143	12	9	0	0.0012	-1	0	-0.0045
6	2207651	2207750	2207695	9	4	0	0.0008	-1	0	-0.0046
6	2207701	2207800	2207755	9	2	0	0.0008	-1	0	-0.0061
6	2214501	2214600	2214588	3	1	0	0.0043	-1	0	-0.0192
6	2214551	2214650	2214613	12	5	0	0.0043	-1	0	-0.0079
6	2215601	2215700	2215647	8	4	0	0.001	-1	0	-0.0016
6	2215651	2215750	2215677	3	3	0	0.001	-1	0	-0.0022
6	2230501	2230600	2230556	7	2	0	0.0011	-1	0	-0.0045
6	2230551	2230650	2230585	5	2	0	0.0011	-1	0	-0.0045
6	2235251	2235350	2235318	2	2	0	0.0019	-1	0	-0.0025
6	2235301	2235400	2235365	6	3	0	0.0019	-1	0	-0.0025
6	2236201	2236300	2236250	3	1	0	0.0011	-1	0	-0.0045
6	2236251	2236350	2236290	1	1	0	0.0011	-1	0	-0.0045
6	2237701	2237800	2237746	2	1	0	0.0011	-1	0	-0.0045
6	2237751	2237850	2237785	1	1	0	0.0011	-1	0	-0.0045
6	2238251	2238350	2238322	1	1	0	0.0019	-1	0	-0.0025
6	2238301	2238400	2238342	2	1	0	0.0019	-1	0	-0.0025
6	2238401	2238500	2238460	2	1	0	0.002	-1	0	-0.0025
6	2238451	2238550	2238518	2	1	0	0.002	-1	0	-0.0025
6	2239951	2240050	2240004	8	3	0	0.0019	-1	0	-0.0018
6	2240001	2240100	2240031	6	1	0	0.0019	-1	0	-0.0025
6	2240301	2240400	2240350	14	4	0	0.004	-1	0	-0.0021
6	2240351	2240450	2240390	12	3	0	0.004	-1	0	-0.0025
6	2243501	2243600	2243570	3	1	0	0.0011	-1	0	-0.0045
6	2243551	2243650	2243593	5	1	0	0.0011	-1	0	-0.0045
6	2246051	2246150	2246109	4	1	0	0.0011	-1	0	-0.0045
6	2246101	2246200	2246149	6	1	0	0.0011	-1	0	-0.0045
6	2247351	2247450	2247399	23	7	0	0.0022	-1	0	-0.0034
6	2247401	2247500	2247447	24	8	0	0.0039	-1	0	-0.005
6	2247451	2247550	2247492	17	7	0	0.0017	-1	0	-0.0027
6	2247501	2247600	2247556	15	5	0	0.0011	-1	0	-0.0017
6	2247551	2247650	2247602	17	4	0	0.0011	-1	0	-0.0028
6	2250651	2250750	2250731	4	2	0	0.0011	-1	0	-0.0045
6	2250701	2250800	2250741	5	2	0	0.0011	-1	0	-0.0045
6	2251301	2251400	2251365	3	2	0	0.0011	-1	0	-0.0045
6	2251351	2251450	2251393	3	2	0	0.0011	-1	0	-0.0045
6	2261051	2261150	2261082	2	1	0	0.0011	-1	0	-0.0045
6	2261101	2261200	2261135	2	2	0	0.0011	-1	0	-0.0044
6	2268751	2268850	2268815	10	5	0	0.0017	-1	0	-0.002
6	2268801	2268900	2268853	11	7	0	0.0017	-1	0	-0.0021
6	2268951	2269050	2269008	8	4	0	0.001	-1	0	-0.0048
6	2269001	2269100	2269060	8	3	0	0.001	-1	0	-0.0047
6	2269251	2269350	2269306	8	3	0	0.0018	-1	0	-0.0028
6	2269301	2269400	2269330	10	6	0	0.0018	-1	0	-0.0025
6	2269551	2269650	2269609	11	3	0.0113	0	1	0.0161	0.0161
6	2269601	2269700	2269657	14	6	0.0113	0.0018	0.7276	0.0066	0.0063
6	2269651	2269750	2269702	16	10	0	0.0036	-1	0	-0.0017
6	2269701	2269800	2269746	11	7	0	0.0018	-1	0	-0.0014
6	2269751	2269850	2269821	18	7	0	0.005	-1	0	-0.0029
6	2269801	2269900	2269841	22	9	0	0.005	-1	0	-0.0027
6	2270651	2270750	2270723	6	2	0	0.0011	-1	0	-0.0046
6	2270701	2270800	2270730	7	3	0	0.0011	-1	0	-0.0045
6	2275051	2275150	2275086	8	1	0	0.0011	-1	0	-0.0046
6	2275101	2275200	2275144	5	1	0	0.0011	-1	0	-0.0046
6	2276751	2276850	2276813	5	1	0	0.0011	-1	0	-0.0045
6	2276801	2276900	2276868	8	2	0	0.0011	-1	0	-0.0045
6	2277851	2277950	2277914	2	2	0	0.0011	-1	0	-0.0045
6	2277901	2278000	2277939	4	2	0	0.0011	-1	0	-0.0045
6	2283701	2283800	2283752	9	8	0	0.001	-1	0	-0.0024
6	2283751	2283850	2283796	6	5	0	0.001	-1	0	-0.0025
6	2287101	2287200	2287164	4	3	0	0.0011	-1	0	-0.0017
6	2287151	2287250	2287210	6	3	0	0.0011	-1	0	-0.0017
6	2288251	2288350	2288312	6	4	0	0.0011	-1	0	-0.0013
6	2288301	2288400	2288347	8	5	0	0.0011	-1	0	-0.001
6	2289051	2289150	2289093	12	8	0	0.0011	-1	0	-0.0007
6	2289101	2289200	2289149	7	5	0	0.0011	-1	0	-0.0011
6	2296701	2296800	2296726	4	3	0	0.0011	-1	0	-0.0025
6	2296751	2296850	2296818	7	3	0	0.0011	-1	0	-0.0025
6	2301051	2301150	2301128	1	1	0	0.0011	-1	0	-0.0044
6	2301101	2301200	2301128	1	1	0	0.0011	-1	0	-0.0044
6	2304501	2304600	2304562	7	5	0	0.0011	-1	0	-0.0014
6	2304551	2304650	2304594	5	3	0	0.0011	-1	0	-0.0019
6	2325501	2325600	2325550	7	2	0	0.0011	-1	0	-0.0046
6	2325551	2325650	2325587	7	3	0	0.0011	-1	0	-0.0046
6	2334651	2334750	2334691	6	1	0	0.0011	-1	0	-0.0045
6	2334701	2334800	2334747	3	1	0	0.0011	-1	0	-0.0045
6	2339701	2339800	2339755	6	2	0	0.001	-1	0	-0.0047
6	2339751	2339850	2339794	6	2	0	0.0021	-1	0	-0.0048
6	2339801	2339900	2339830	4	1	0	0.001	-1	0	-0.0048
6	2343251	2343350	2343303	8	5	0	0.0011	-1	0	-0.0013
6	2343301	2343400	2343341	8	7	0	0.0011	-1	0	-0.0008
6	2344401	2344500	2344457	4	2	0	0.0011	-1	0	-0.0046
6	2344451	2344550	2344502	3	2	0	0.0011	-1	0	-0.0046
6	2344501	2344600	2344572	7	2	0	0.0011	-1	0	-0.0026
6	2344551	2344650	2344589	8	3	0	0.0011	-1	0	-0.0026
6	2345051	2345150	2345105	5	1	0	0	-1	0	-0.5487
6	2345101	2345200	2345159	8	2	0	0	-1	0	-0.1893
6	2346651	2346750	2346706	13	6	0	0.0021	-1	0	-0.0033
6	2346701	2346800	2346737	10	3	0	0.0021	-1	0	-0.0097
6	2347501	2347600	2347562	5	2	0	0.0011	-1	0	-0.0046
6	2347551	2347650	2347601	11	3	0	0.0011	-1	0	-0.0046
6	2347601	2347700	2347638	11	4	0	0.0001	-1	0	-0.0005
6	2347651	2347750	2347690	7	3	0	0.0001	-1	0	-0.0005
6	2348101	2348200	2348169	6	3	0	0.0011	-1	0	-0.0024
6	2348151	2348250	2348199	9	3	0	0.0011	-1	0	-0.0024
6	2348601	2348700	2348686	6	1	0	0.001	-1	0	-0.0049
6	2348651	2348750	2348702	10	2	0	0.001	-1	0	-0.0049
6	2348701	2348800	2348757	9	5	0	0.0011	-1	0	-0.0024
6	2348751	2348850	2348802	11	6	0	0.0011	-1	0	-0.0024
6	2350101	2350200	2350150	12	4	0	0	-1	12.8421	-0.1439
6	2350151	2350250	2350180	7	3	0	0	-1	12.8421	-0.2084
6	2356451	2356550	2356489	15	2	0	0.0011	-1	0	-0.0026
6	2356501	2356600	2356550	12	4	0	0.0011	-1	0	-0.0026
6	2356851	2356950	2356899	4	2	0	0.0011	-1	0	-0.0044
6	2356901	2357000	2356949	3	2	0	0.0011	-1	0	-0.0044
6	2357251	2357350	2357328	5	1	0	0.0021	-1	0	-0.0024
6	2357301	2357400	2357347	7	1	0	0.0021	-1	0	-0.0024
6	2364151	2364250	2364200	3	1	0	0.0011	-1	0	-0.0044
6	2364201	2364300	2364250	4	1	0	0.0011	-1	0	-0.0044
6	2364851	2364950	2364919	3	1	0	0.0011	-1	0	-0.0044
6	2364901	2365000	2364946	3	1	0	0.0011	-1	0	-0.0044
6	2372751	2372850	2372838	2	1	0	0.0011	-1	0	-0.0045
6	2372801	2372900	2372843	3	1	0	0.0011	-1	0	-0.0045
6	2372901	2373000	2372954	2	1	0	0.0011	-1	0	-0.0045
6	2372951	2373050	2373008	2	1	0	0.0011	-1	0	-0.0045
6	2373301	2373400	2373358	2	1	0	0.0011	-1	0	-0.0044
6	2373351	2373450	2373380	3	1	0	0.0011	-1	0	-0.0044
6	2376851	2376950	2376908	6	2	0	0.0002	-1	0	-0.1021
6	2376901	2377000	2376934	7	2	0	0.0002	-1	0	-0.1021
6	2376951	2377050	2377019	9	3	0	0.0011	-1	0	-0.0045
6	2377001	2377100	2377048	11	4	0	0.0011	-1	0	-0.0045
6	2405201	2405300	2405245	5	2	0	0.0005	-1	0	-0.0102
6	2405251	2405350	2405289	3	1	0	0.0005	-1	0	-0.0102
6	2408101	2408200	2408154	8	5	0	0	-1	0	-0.1769
6	2408151	2408250	2408197	8	7	0	0.0011	-1	0	-0.0048
6	2408201	2408300	2408228	4	2	0	0.001	-1	0	-0.0047
6	2410501	2410600	2410540	4	2	0	0.001	-1	0	-0.0049
6	2410551	2410650	2410579	3	1	0	0.001	-1	0	-0.0049
[truncated: 35,316 more rows]

## Sheet: Table S9
Supplementary Table S9 : 2710 accessions samples from Africa and Asia. This table was adapted from the additional data in the article Wang and al. 2018 : https://www.nature.com/articles/s41586-018-0063-9
ID	N_MISS	N_GENO	F_MISS	country	type	zone	sub	name
IRIS_313-10046	5783051	29635224	0.1951	Zambia	T	EAF	XI-1B	CHAMA (DWARF)::IRGC 69487-1
IRIS_313-11779	5749577	29635224	0.194	Tanzania	T	EAF	XI-3	KATUMANI::IRGC 69695-1
IRIS_313-11785	5706581	29635224	0.1926	Tanzania	T	EAF	XI-3	MOSHI::IRGC 69737-1
IRIS_313-10536	5610551	29635224	0.1893	Tanzania	I	EAF	XI-2	GAMTI 1-34::IRGC 6479-2
IRIS_313-12053	5486818	29635224	0.1851	Burundi	I	EAF	XI-adm	FACAGRO 406::IRGC 82049-1
IRIS_313-11932	5426810	29635224	0.1831	Kenya	T	EAF	XI-2	SINDANO 3::IRGC 75279-1
IRIS_313-10113	5279537	29635224	0.1782	Mozambique	inc	EAF	XI-adm	EX FOILAEIN (NAPUTO)::IRGC 81675-1
IRIS_313-11782	5250081	29635224	0.1772	Zambia	T	EAF	XI-2	MALAGASY::IRGC 69717-1
IRIS_313-11780	5079979	29635224	0.1714	Tanzania	T	EAF	XI-3	KILOMBERO::IRGC 69698-1
IRIS_313-11914	5036075	29635224	0.1699	Burundi	T	EAF	XI-2	IB 11::IRGC 74420-2
IRIS_313-9791	4833243	29635224	0.1631	Malawi	inc	EAF	XI-adm	LEAD::IRGC 5805-1
IRIS_313-8571	4800159	29635224	0.162	Tanzania	T	EAF	XI-3	ES 21::IRGC 56171-1
IRIS_313-8909	4734319	29635224	0.1598	Tanzania	T	EAF	XI-3	FAYA MOSHI::IRGC 69653-1
IRIS_313-11813	4161388	29635224	0.1404	Kenya	T	EAF	XI-3	ZERO::IRGC 70707-2
IRIS_313-11811	4141731	29635224	0.1398	Kenya	T	EAF	XI-2	MOSHI::IRGC 70648-1
IRIS_313-11814	4122385	29635224	0.1391	Kenya	T	EAF	XI-3	KIKUBA::IRGC 70722-1
IRIS_313-11663	4005898	29635224	0.1352	Zimbabwe	T	EAF	admix	MARHARORA::IRGC 63511-1
IRIS_313-10114	3995502	29635224	0.1348	Burundi	I	EAF	XI-2	FACAGRO 64::IRGC 82059-1
IRIS_313-11815	3988898	29635224	0.1346	Kenya	T	EAF	XI-3	MOSHI::IRGC 70730-1
IRIS_313-11809	3951303	29635224	0.1333	Kenya	T	EAF	cA (Aus)	MHARAKA::IRGC 70612-1
IRIS_313-11810	3914652	29635224	0.1321	Kenya	T	EAF	XI-3	PULURE::IRGC 70647-1
IRIS_313-11812	3703061	29635224	0.125	Kenya	T	EAF	XI-3	ASFALA::IRGC 70650-1
IRIS_313-8145	2317304	29635224	0.07819	Tanzania	T	EAF	GJ-tmp	SUPER::GERVEX 1304-C1
IRIS_313-11157	7053586	29635224	0.238	Taiwan	inc	EAR	XI-1A	T KAUG PAO::IRGC 34182-1
IRIS_313-10040	6167003	29635224	0.2081	Korea, Republic of	I	EAR	XI-1B	MILYANG 77::IRGC 69340-1
IRIS_313-8880	6143993	29635224	0.2073	Taiwan	I	EAR	XI-adm	PAGAIYAHAN::IRGC 8267-1
IRIS_313-8743	6003763	29635224	0.2026	Taiwan	inc	EAR	XI-adm	NIAO YAO::IRGC 5496-1
CX28	5953391	29635224	0.2009	Korea, Republic of	P	EAR	XI-1B	Gayabyeo
CX122	5934321	29635224	0.2002	Taiwan	P	EAR	XI-adm	Tai-Zhong-Xian 10
IRIS_313-9882	5914460	29635224	0.1996	Taiwan	inc	EAR	XI-adm	O. SATIVA::IRGC 17083-1
IRIS_313-11237	5610499	29635224	0.1893	Taiwan	I	EAR	XI-1B	TAICHUNG SEN YU 214::IRGC 38899-1
IRIS_313-10353	5452466	29635224	0.184	Korea, Republic of	I	EAR	XI-adm	HP 3319-2WX-6-4-1-B::IRGC 117331-1
IRIS_313-10001	5322327	29635224	0.1796	Taiwan	I	EAR	XI-1B	C 662083::IRGC 62101-1
IRIS_313-11990	5237997	29635224	0.1767	Taiwan	I	EAR	XI-1B	TAISEN GLUTINOUS YU 1157::IRGC 78750-1
IRIS_313-10103	5224487	29635224	0.1763	Korea, Republic of	P	EAR	XI-adm	DALSUNG 41::IRGC 79385-1
IRIS_313-9925	5203789	29635224	0.1756	Korea, Republic of	I	EAR	XI-1B	MILYANG 30::IRGC 46977-1
B159	5189309	29635224	0.1751	Taiwan	I	EAR	XI-adm	Taizhongzailai 1/taizhong65
B044	5177121	29635224	0.1747	Japan	inc	EAR	XI-adm	Santiannuo
CX182	5175197	29635224	0.1746	Japan	P	EAR	XI-adm	SLG 1
CX162	5114920	29635224	0.1726	Taiwan	I	EAR	XI-1A	TN1
B166	5058333	29635224	0.1707	Democratic People's Republic of Korea	inc	EAR	GJ-tmp	Jianghuadao
IRIS_313-9705	5056060	29635224	0.1706	Taiwan	inc	EAR	XI-1A	TAITUNG WOO LI::IRGC 111-1
IRIS_313-9976	5054805	29635224	0.1706	Korea, Republic of	T	EAR	XI-1A	SSANGDUJO::IRGC 55632-1
IRIS_313-10077	5053464	29635224	0.1705	Japan	T	EAR	XI-adm	TAMASHIRO HIKARI::IRGC 74534-1
IRIS_313-9924	5045550	29635224	0.1703	Korea, Republic of	I	EAR	XI-adm	KN 1 B 361-1-8-6-9::IRGC 46974-1
B197	5025724	29635224	0.1696	Taiwan	inc	EAR	XI-1A	Taizhongxianxuan 2
IRIS_313-10515	5011402	29635224	0.1691	Taiwan	I	EAR	XI-1A	TAICHUNG WOO GEN 2::IRGC 5525-1
IRIS_313-9706	5002720	29635224	0.1688	Taiwan	inc	EAR	XI-1A	TAIPEI WOO CO::IRGC 112-1
IRIS_313-9708	4991607	29635224	0.1684	Taiwan	inc	EAR	XI-1A	TSAI YUAN CHON::IRGC 126-1
IRIS_313-11694	4966968	29635224	0.1676	Taiwan	T	EAR	XI-adm	CHING LIU::IRGC 65018-1
IRIS_313-11980	4806738	29635224	0.1622	Taiwan	inc	EAR	XI-1A	HSINCHU AI CHIO CHIENG::IRGC 78182-1
CX29	4756108	29635224	0.1605	Korea, Republic of	I	EAR	admix	Milyang 23
IRIS_313-11695	4701931	29635224	0.1587	Taiwan	T	EAR	XI-1A	HSIN-T'AO YUAN CHING YU::IRGC 65074-1
IRIS_313-9758	4698292	29635224	0.1585	Taiwan	inc	EAR	XI-1A	I KUNG PAO::IRGC 114-1
IRIS_313-10000	4597286	29635224	0.1551	Korea, Republic of	I	EAR	XI-1B	SUWEON 311::IRGC 61890-1
CX102	4590539	29635224	0.1549	Taiwan	P	EAR	XI-1A	Tek Si Chut
IRIS_313-8454	4490496	29635224	0.1515	Taiwan	inc	EAR	XI-1A	LAI YIP ZIM::IRGC 4955-1
IRIS_313-9922	4446310	29635224	0.15	Korea, Republic of	I	EAR	XI-1B	IRI 339::IRGC 46956-1
CX270	4351935	29635224	0.1469	Taiwan	I	EAR	XI-1A	TAICHUNGNATIVE1
IRIS_313-10057	4272732	29635224	0.1442	Japan	I	EAR	GJ-tmp	CHUGOKU 68 HEN::IRGC 72514-1
IRIS_313-10585	4241753	29635224	0.1431	Japan	inc	EAR	admix	UKON NISHIKI::IRGC 8314-1
IRIS_313-11693	4076670	29635224	0.1376	Taiwan	T	EAR	XI-adm	CHING CH'UNG::IRGC 65002-1
IRIS_313-11692	3923650	29635224	0.1324	Taiwan	T	EAR	XI-1A	CHIAYI WU-K'O::IRGC 64974-1
IRIS_313-10076	3818046	29635224	0.1288	Japan	T	EAR	GJ-trp	SHINA MOCHI::IRGC 74523-1
IRIS_313-11698	3771579	29635224	0.1273	Taiwan	I	EAR	cB (Bas)	TAIPEI 167::IRGC 65371-1
IRIS_313-8927	3733238	29635224	0.126	Taiwan	inc	EAR	GJ-sbtrp	NABESHI::IRGC 8269-1
CX110	3625755	29635224	0.1223	Japan	P	EAR	cB (Bas)	UP 15
CX112	3609188	29635224	0.1218	Japan	P	EAR	admix	Ginga
B196	3519404	29635224	0.1188	Taiwan	inc	EAR	GJ-trp	Taidongludao
IRIS_313-10507	3519050	29635224	0.1187	Taiwan	P	EAR	GJ-trp	HSIANG TSENF TAO::IRGC 5008-1
IRIS_313-9789	3372281	29635224	0.1138	Japan	inc	EAR	GJ-trp	RIKUTO TAUKI MOCHI 27::IRGC 5726-1
IRIS_313-10075	3342446	29635224	0.1128	Japan	T	EAR	GJ-trp	SANGOKU::IRGC 74518-1
IRIS_313-8873	3329322	29635224	0.1123	Taiwan	inc	EAR	admix	PAOTSUPAGAIAHON::IRGC 17072-1
IRIS_313-8400	3323375	29635224	0.1121	Japan	inc	EAR	GJ-trp	RIKUTO NORIN MOCHI 20::IRGC 410-1
IRIS_313-10071	3321332	29635224	0.1121	Japan	T	EAR	GJ-trp	CHIYODA WASE::IRGC 74467-1
IRIS_313-10065	3280800	29635224	0.1107	Korea, Republic of	T	EAR	GJ-trp	JAERAERYUKDO::IRGC 73053-1
IRIS_313-9995	3237872	29635224	0.1093	Korea, Republic of	I	EAR	GJ-trp	NONGLIMNA 1::IRGC 58347-1
IRIS_313-10082	3198917	29635224	0.1079	Japan	T	EAR	GJ-trp	KYUUSHUU::IRGC 74558-1
IRIS_313-10056	3193522	29635224	0.1078	Japan	inc	EAR	GJ-sbtrp	HOKURIKU 52::IRGC 72491-1
IRIS_313-9800	3175503	29635224	0.1072	Japan	P	EAR	GJ-trp	KAHEI::IRGC 7691-1
IRIS_313-10079	3167628	29635224	0.1069	Japan	T	EAR	GJ-trp	DANGO MOCHI::IRGC 74551-1
B168	3100829	29635224	0.1046	Japan	inc	EAR	GJ-tmp	Zhuyuan
IRIS_313-10067	3056541	29635224	0.1031	Korea, Republic of	T	EAR	GJ-trp	JEONBUKGUNGWEONNA::IRGC 73055-1
IRIS_313-10074	3045926	29635224	0.1028	Japan	T	EAR	GJ-trp	RIKU AIKOKU::IRGC 74514-1
IRIS_313-10073	3026626	29635224	0.1021	Japan	T	EAR	GJ-trp	OWARI MOCHI::IRGC 74513-1
IRIS_313-10094	3008127	29635224	0.1015	Korea, Republic of	T	EAR	GJ-trp	GAWICHAL::IRGC 77653-1
IRIS_313-10080	2839082	29635224	0.0958	Japan	T	EAR	GJ-trp	HIRAKAWA OKUTE::IRGC 74554-1
B158	2782133	29635224	0.09388	Taiwan	I	EAR	admix	Taizhong 65/taizhongHR539
IRIS_313-9346	2742727	29635224	0.09255	Taiwan	P	EAR	GJ-tmp	SHINCHIKU IKU 103::IRGC 10430-1
B169	2737062	29635224	0.09236	Japan	inc	EAR	GJ-tmp	Ailuyu
IRIS_313-10078	2702684	29635224	0.0912	Japan	T	EAR	GJ-trp	YOSHINO MOCHI::IRGC 74550-1
CX315	2666368	29635224	0.08997	Democratic People's Republic of Korea	P	EAR	GJ-tmp	Zidao
B047	2569683	29635224	0.08671	Korea, Republic of	inc	EAR	GJ-tmp	Zhenfu 8
IRIS_313-10096	2520643	29635224	0.08506	Korea, Republic of	T	EAR	GJ-adm	JOKJEBICHAL::IRGC 77663-1
IRIS_313-11246	2510775	29635224	0.08472	Japan	inc	EAR	GJ-tmp	7516-14::IRGC 40090-3
B023	2457568	29635224	0.08293	Democratic People's Republic of Korea	inc	EAR	GJ-tmp	Gaoliqiu
IRIS_313-9703	2447559	29635224	0.08259	Taiwan	P	EAR	GJ-tmp	CHIANAN 8::IRGC 90-1
IRIS_313-10838	2372411	29635224	0.08005	Korea, Republic of	T	EAR	GJ-tmp	SSAL BYEO::IRGC 19867-2
IRIS_313-9886	2323148	29635224	0.07839	Korea, Republic of	T	EAR	GJ-tmp	HUK ZO::IRGC 19760-1
IRIS_313-9523	2322750	29635224	0.07838	Japan	I	EAR	GJ-adm	RIKUTO KEMOCHI::IRGC 2719-1
IRIS_313-9769	2279517	29635224	0.07692	Japan	P	EAR	GJ-tmp	MURASAHITSUTSURI::IRGC 2493-1
IRIS_313-11875	2260501	29635224	0.07628	Japan	inc	EAR	GJ-tmp	CHUBU 17::IRGC 72505-1
IRIS_313-9887	2241677	29635224	0.07564	Korea, Republic of	T	EAR	GJ-tmp	JEUK DO::IRGC 19775-1
IRIS_313-15904	2240572	29635224	0.07561	Korea, Republic of	inc	EAR	GJ-tmp	JINBUBYEO::G1
IRIS_313-10429	2233562	29635224	0.07537	Taiwan	I	EAR	GJ-tmp	TAICHUNG 150::IRGC 80-1
IRIS_313-10837	2227773	29635224	0.07517	Korea, Republic of	T	EAR	GJ-tmp	BACK KYUNG ZO::IRGC 19698-2
IRIS_313-9890	2217996	29635224	0.07484	Korea, Republic of	T	EAR	GJ-tmp	WA BANG::IRGC 19880-1
IRIS_313-9438	2139664	29635224	0.0722	Japan	inc	EAR	GJ-tmp	7507-137::IRGC 40081-1
IRIS_313-12217	2123690	29635224	0.07166	Korea, Republic of	P	EAR	GJ-tmp	WEONJU 8::IRGC 90845-1
IRIS_313-10124	2070850	29635224	0.06988	Korea, Republic of	P	EAR	GJ-tmp	GALSAEGSSAL SHAREI::IRGC 82881-1
B167	2043692	29635224	0.06896	Democratic People's Republic of Korea	inc	EAR	GJ-tmp	Qingjinzaosheng
CX212	2036218	29635224	0.06871	Japan	P	EAR	GJ-tmp	Nongken 58
IRIS_313-9974	1987766	29635224	0.06707	Korea, Republic of	T	EAR	GJ-tmp	HEUKSANJO::IRGC 55536-1
IRIS_313-12003	1978539	29635224	0.06676	Korea, Republic of	P	EAR	GJ-tmp	GYEONGSAN 1::IRGC 79404-1
CX330	1964045	29635224	0.06627	Japan	P	EAR	GJ-tmp	Yueguang
IRIS_313-9891	1926990	29635224	0.06502	Korea, Republic of	T	EAR	GJ-tmp	YONG AN HUK::IRGC 19891-1
B182	1886017	29635224	0.06364	Japan	inc	EAR	GJ-tmp	Chimao
IRIS_313-10093	1845820	29635224	0.06228	Korea, Republic of	T	EAR	GJ-tmp	CHEONJUDO::IRGC 77644-1
IRIS_313-11973	1832406	29635224	0.06183	Korea, Republic of	T	EAR	GJ-tmp	NOINJO::IRGC 77669-1
CX396	1814741	29635224	0.06124	Japan	P	EAR	GJ-tmp	Guandong 194 (Soft Rice)
IRIS_313-9379	1805515	29635224	0.06092	Korea, Republic of	T	EAR	GJ-tmp	HWANGJO::IRGC 55547-1
IRIS_313-10469	1756572	29635224	0.05927	Japan	I	EAR	GJ-tmp	KINUGASAWASE::IRGC 2609-1
IRIS_313-10631	1741538	29635224	0.05877	Taiwan	inc	EAR	GJ-tmp	SHINCHIKU IKU 97::IRGC 10429-1
CX116	1723526	29635224	0.05816	Democratic People's Republic of Korea	P	EAR	GJ-tmp	Wudadaozhong
IRIS_313-10840	1719731	29635224	0.05803	Korea, Republic of	T	EAR	GJ-tmp	YE ZO::IRGC 19888-1
IRIS_313-9698	1676849	29635224	0.05658	Democratic People's Republic of Korea	T	EAR	GJ-tmp	JO SANG DAE YA::IRGC 90852-1
B005	1655495	29635224	0.05586	Japan	inc	EAR	GJ-tmp	Wanshi
IRIS_313-9702	1642849	29635224	0.05544	Taiwan	I	EAR	GJ-tmp	TAICHUNG 179::IRGC 85-1
IRIS_313-11890	1633081	29635224	0.05511	Taiwan	I	EAR	GJ-tmp	C 722323::IRGC 73147-1
B183	1615049	29635224	0.0545	Japan	inc	EAR	GJ-tmp	Qingnuo Kyohatamochi
B045	1606911	29635224	0.05422	Japan	inc	EAR	GJ-tmp	Gongchengxiang
IRIS_313-10568	1602697	29635224	0.05408	Japan	P	EAR	GJ-tmp	OITA MII 120::IRGC 7696-1
IRIS_313-9884	1597597	29635224	0.05391	Japan	inc	EAR	GJ-tmp	FUKUSHIMA MOCHI (GLUT)::IRGC 19296-1
IRIS_313-10437	1597290	29635224	0.0539	Japan	I	EAR	GJ-tmp	NORIN 21::IRGC 493-1
IRIS_313-10092	1583302	29635224	0.05343	Korea, Republic of	T	EAR	GJ-tmp	CHALBYEO::IRGC 77639-1
IRIS_313-10839	1562359	29635224	0.05272	Korea, Republic of	T	EAR	GJ-tmp	TAE GU NA::IRGC 19875-2
IRIS_313-10097	1548024	29635224	0.05224	Korea, Republic of	T	EAR	GJ-tmp	MAEKJO::IRGC 77666-1
IRIS_313-10569	1522748	29635224	0.05138	Japan	inc	EAR	GJ-tmp	BEN KEI::IRGC 7769-1
B269	1486764	29635224	0.05017	Japan	inc	EAR	GJ-tmp	Yuefu
IRIS_313-10430	1471738	29635224	0.04966	Japan	inc	EAR	GJ-tmp	GINMASARI::IRGC 242-1
B046	1426107	29635224	0.04812	Japan	inc	EAR	GJ-tmp	Qiutianxiaoting
IRIS_313-9002	1421153	29635224	0.04795	Japan	I	EAR	GJ-tmp	KOTOBUKI MOCHI::IRGC 2545-1
IRIS_313-9228	1411686	29635224	0.04764	Japan	P	EAR	GJ-tmp	HOKUSETSU::IRGC 65705-1
IRIS_313-10059	1381588	29635224	0.04662	Korea, Republic of	inc	EAR	GJ-tmp	DACHEONGBYEO::IRGC 72533-1
B004	1376430	29635224	0.04645	Japan	inc	EAR	GJ-tmp	Qiuguangtengxi 104
IRIS_313-9996	1360666	29635224	0.04591	Korea, Republic of	I	EAR	GJ-tmp	SUWEON 295::IRGC 58368-1
IRIS_313-10570	1354783	29635224	0.04572	Japan	inc	EAR	GJ-tmp	CHUSEI HONEN::IRGC 7777-1
IRIS_313-10567	1334753	29635224	0.04504	Japan	inc	EAR	GJ-tmp	AIKAWA 44::IRGC 7676-1
IRIS_313-11981	1275345	29635224	0.04303	Taiwan	I	EAR	GJ-tmp	TAICHUNG 188::IRGC 78209-1
IRIS_313-10564	1270440	29635224	0.04287	Japan	P	EAR	GJ-tmp	250 KUNGANI 1::IRGC 7370-1
IRIS_313-9081	1229705	29635224	0.04149	Japan	T	EAR	GJ-tmp	TAKAO MOCHI::IRGC 2564-1
IRIS_313-10677	1167232	29635224	0.03939	Japan	P	EAR	GJ-tmp	DEWAMINORI::IRGC 12743-1
IRIS_313-8755	1104268	29635224	0.03726	Japan	I	EAR	GJ-tmp	NORIN 6::IRGC 2633-1
IRIS_313-9701	1078870	29635224	0.0364	Taiwan	I	EAR	GJ-tmp	TAICHUNG 65::IRGC 79-1
IRIS_313-10642	1039128	29635224	0.03506	Japan	P	EAR	GJ-tmp	SACHIKAZE::IRGC 10891-1
IRIS_313-11689	930339	29635224	0.03139	Korea, Republic of	inc	EAR	GJ-tmp	DECHANGBYEO::IRGC 64858-1
CX140	718281	29635224	0.02424	Japan	I	EAR	GJ-tmp	Nipponbare
IRIS_313-11725	599468	29635224	0.02023	Japan	I	EAR	GJ-tmp	ZUIHOU::IRGC 66982-1
B203	8916374	29635224	0.3009	China	inc	EAS	XI-adm	Biwusheng
CX9	8392578	29635224	0.2832	China	P	EAS	XI-1B	Fengaizhan
IRIS_313-8859	8379822	29635224	0.2828	China	inc	EAS	XI-1A	E ZI 96::IRGC 70188-1
B087	7590311	29635224	0.2561	China	inc	EAS	XI-2	Zhongnong 4
B202	7385232	29635224	0.2492	China	inc	EAS	XI-adm	Baoxie 123B
IRIS_313-11158	7329365	29635224	0.2473	China	inc	EAS	XI-1A	NAN ERH AI 5::IRGC 34255-1
CX548	7076272	29635224	0.2388	China	P	EAS	XI-adm	Zhongjian 100
CX5	7044935	29635224	0.2377	China	P	EAS	XI-adm	108S
B207	6967375	29635224	0.2351	China	inc	EAS	XI-adm	Aihechi
B146	6849821	29635224	0.2311	China	inc	EAS	XI-1B	JWR 221
CX50	6847466	29635224	0.2311	China	P	EAS	XI-1B	Ai Zi DAO
CX386	6811026	29635224	0.2298	China	P	EAS	XI-adm	NPT-114
CX378	6702339	29635224	0.2262	China	P	EAS	XI-1B	Huhan 15
B120	6683841	29635224	0.2255	China	inc	EAS	XI-adm	Hongwan 1
CX8	6662422	29635224	0.2248	China	P	EAS	XI-adm	Chenghui 448
CX20	6602303	29635224	0.2228	China	P	EAS	XI-adm	Zihui 100
CX370	6603664	29635224	0.2228	China	P	EAS	XI-1B	Chenghui 727
B239	6592384	29635224	0.2225	China	inc	EAS	XI-1A	Zhendao 232
B200	6592324	29635224	0.2224	China	inc	EAS	XI-1B	Jinyou 1
CX12	6513716	29635224	0.2198	China	P	EAS	XI-adm	Huagengxian 74
IRIS_313-10497	6483963	29635224	0.2188	China	inc	EAS	XI-1A	CE IN TSAN::IRGC 4362-1
IRIS_313-11872	6479040	29635224	0.2186	China	inc	EAS	XI-1A	TIE ZHONG::IRGC 72321-1
B198	6470948	29635224	0.2184	China	inc	EAS	XI-1A	Jiefangxian
B165	6454080	29635224	0.2178	China	inc	EAS	XI-adm	Haohuangla
IRIS_313-11422	6455136	29635224	0.2178	China	P	EAS	XI-1A	13946 (GUANG QIU 15)::IRGC 50320-1
IRIS_313-11862	6373264	29635224	0.2151	China	inc	EAS	XI-1A	HENG YE ZAO::IRGC 72092-1
B213	6330036	29635224	0.2136	China	inc	EAS	XI-1A	Liuyenian
CX18	6312444	29635224	0.213	China	P	EAS	XI-1A	Zaoxian 14
IRIS_313-9065	6258249	29635224	0.2112	China	inc	EAS	XI-1A	PAI CHUEH CHIU LIU::IRGC 34259-1
B260	6253677	29635224	0.211	China	inc	EAS	XI-1A	Mamagu
CX88	6245170	29635224	0.2107	China	P	EAS	XI-1A	Huanyangnian
B231	6241135	29635224	0.2106	China	inc	EAS	XI-adm	Dongtingwanxian
B244	6234936	29635224	0.2104	China	inc	EAS	XI-1A	Xiangdao
CX17	6229009	29635224	0.2102	China	P	EAS	XI-adm	Yuexiangzhan
IRIS_313-10450	6197090	29635224	0.2091	China	T	EAS	XI-1A	CHAN KU::IRGC 1069-1
IRIS_313-10452	6190308	29635224	0.2089	China	P	EAS	XI-1A	LING TA 150::IRGC 1106-1
B255	6183506	29635224	0.2087	China	inc	EAS	XI-adm	Dianrui 409B
CX55	6161932	29635224	0.2079	China	P	EAS	XI-1A	Pengshantieganzhan
IRIS_313-7635	6159057	29635224	0.2078	China	I	EAS	XI-1B	SEQ 93::C1
B201	6154586	29635224	0.2077	China	inc	EAS	XI-1B	Chengnongshuijing
CX51	6150457	29635224	0.2075	China	P	EAS	XI-adm	Babaomi
B088	6119854	29635224	0.2065	China	inc	EAS	XI-adm	San**Qishiluo
IRIS_313-10504	6077571	29635224	0.2051	China	inc	EAS	XI-1A	HSIEH DAU::IRGC 4727-1
B138	6065093	29635224	0.2047	China	inc	EAS	XI-adm	Gu 154
IRIS_313-8889	6031128	29635224	0.2035	China	inc	EAS	XI-adm	LU MAO ZHAN::IRGC 68159-1
B227	6008852	29635224	0.2028	China	inc	EAS	XI-adm	Menjiagao 1
B242	5989936	29635224	0.2021	China	inc	EAS	XI-adm	Gui 630
CX19	5989531	29635224	0.2021	China	P	EAS	XI-adm	Zhong 413
IRIS_313-11865	5964018	29635224	0.2012	China	inc	EAS	XI-1A	HUO QING::IRGC 72148-1
B093	5949753	29635224	0.2008	China	T	EAS	XI-1A	Qitougu
B267	5936894	29635224	0.2003	China	inc	EAS	XI-adm	0
CX366	5935647	29635224	0.2003	China	P	EAS	XI-adm	Ganwanxian 37 (926)
B238	5916722	29635224	0.1997	China	inc	EAS	XI-adm	Momi
CX385	5913498	29635224	0.1995	China	P	EAS	XI-1B	NPT-100
IRIS_313-8380	5867048	29635224	0.198	China	inc	EAS	XI-1A	SAN CHIAO TSWEN::IRGC 1565-1
IRIS_313-9111	5845708	29635224	0.1973	China	inc	EAS	XI-1A	XIA ZHI BAI::IRGC 53437-1
B063	5839099	29635224	0.197	China	inc	EAS	XI-1A	Guizhao 2
B248	5829956	29635224	0.1967	China	I	EAS	XI-1A	Zhuzhen B
CX52	5794383	29635224	0.1955	China	P	EAS	XI-adm	Diandun 502
IRIS_313-15897	5779054	29635224	0.195	China	I	EAS	XI-adm	SANHUANGZHAN NO 2::G1
B112	5761427	29635224	0.1944	China	inc	EAS	XI-1A	Liusha 1
IRIS_313-11585	5754465	29635224	0.1942	China	I	EAS	XI-1A	ACC 1286::IRGC 60116-1
B075	5748118	29635224	0.194	China	inc	EAS	XI-adm	Jinbaoyin
B145	5734602	29635224	0.1935	China	inc	EAS	XI-adm	Teqingxuanhui
CX53	5718980	29635224	0.193	China	P	EAS	XI-adm	Jiangxisimiao
IRIS_313-9184	5688283	29635224	0.1919	China	inc	EAS	XI-adm	XI GAN JING REN::IRGC 60035-1
B126	5683621	29635224	0.1918	China	inc	EAS	XI-1A	Zaoxian 240
IRIS_313-11576	5682229	29635224	0.1917	China	inc	EAS	XI-adm	JIANG HUI DAO::IRGC 59688-1
CX341	5667175	29635224	0.1912	China	P	EAS	XI-adm	Hua 565
B153	5660338	29635224	0.191	China	inc	EAS	XI-adm	Qingsiai 16B
B268	5631138	29635224	0.19	China	inc	EAS	XI-adm	Nangaogu
IRIS_313-11863	5630734	29635224	0.19	China	inc	EAS	XI-1A	HONG DU BAI::IRGC 72098-1
CX393	5609545	29635224	0.1893	China	P	EAS	XI-1B	Huangsizhan
B060	5605862	29635224	0.1892	China	inc	EAS	XI-1A	Aijiaonante
IRIS_313-11948	5595593	29635224	0.1888	China	inc	EAS	XI-1A	HOU LU BAI::IRGC 76582-1
IRIS_313-11573	5580719	29635224	0.1883	China	inc	EAS	XI-adm	GAO LIANG ZAO::IRGC 59563-1
IRIS_313-10191	5576964	29635224	0.1882	China	inc	EAS	XI-1A	MIN KE ZHAN::IRGC 72230-1
IRIS_313-10477	5570455	29635224	0.188	China	inc	EAS	XI-adm	RUSTY LATE::IRGC 3506-1
IRIS_313-9555	5559907	29635224	0.1876	China	inc	EAS	XI-adm	CHUA DAU::IRGC 4785-1
CX343	5545173	29635224	0.1871	China	P	EAS	XI-adm	Wanxian 77
B067	5540019	29635224	0.1869	China	inc	EAS	XI-1A	Funingzipigengzi
IRIS_313-10170	5522116	29635224	0.1863	China	inc	EAS	XI-1A	MIN ZAO 6::IRGC 63772-1
IRIS_313-11861	5506757	29635224	0.1858	China	inc	EAS	XI-1A	HEI YAN ZHAN::IRGC 72090-1
B151	5494547	29635224	0.1854	China	inc	EAS	XI-1A	Jinnante 43B
IRIS_313-11577	5493275	29635224	0.1854	China	inc	EAS	XI-1A	LANG QIAN CHE::IRGC 59730-1
IRIS_313-10502	5492222	29635224	0.1853	China	inc	EAS	XI-1A	TON ROO SHUN::IRGC 4572-1
IRIS_313-10932	5486156	29635224	0.1851	China	P	EAS	XI-1A	CHINA 1039 MUTANT (DWARF)::IRGC 24168-2
CX145	5470699	29635224	0.1846	China	I	EAS	XI-adm	Minghui 63
B234	5467122	29635224	0.1845	China	I	EAS	XI-1A	Aituogu 151
IRIS_313-9204	5468268	29635224	0.1845	China	inc	EAS	XI-1A	CHI SHENG TAO::IRGC 4606-1
B155	5465126	29635224	0.1844	China	inc	EAS	XI-adm	Baoxie-7B
B232	5450214	29635224	0.1839	China	inc	EAS	XI-1B	Xiangaizao 10hao
IRIS_313-8412	5439708	29635224	0.1836	China	inc	EAS	XI-adm	FEI GAI 122::IRGC 63599-1
IRIS_313-8405	5436603	29635224	0.1835	China	inc	EAS	XI-adm	JIN JUN DAO::IRGC 59710-1
IRIS_313-10178	5428756	29635224	0.1832	China	inc	EAS	XI-1A	GAO JIAO BAI::IRGC 68047-1
B233	5422220	29635224	0.183	China	inc	EAS	XI-adm	Xiangwanxian 1
CX319	5421879	29635224	0.183	China	P	EAS	XI-adm	Mengguandamagu
B058	5419886	29635224	0.1829	China	I	EAS	XI-1B	Erjiunan 1
B133	5402750	29635224	0.1823	China	inc	EAS	XI-adm	Yanshuichi
CX15	5402089	29635224	0.1823	China	P	EAS	XI-1B	Y 134
IRIS_313-11857	5390295	29635224	0.1819	China	inc	EAS	XI-1A	DA LI BAI 63::IRGC 72016-1
CX54	5383241	29635224	0.1817	China	P	EAS	XI-adm	Linyitangdao
B132	5376827	29635224	0.1814	China	inc	EAS	XI-adm	Xiaobaimi
CX394	5367155	29635224	0.1811	China	P	EAS	XI-1B	Molizhanxuan
B118	5331350	29635224	0.1799	China	inc	EAS	XI-adm	Ergangai
B224	5330267	29635224	0.1799	China	inc	EAS	XI-1A	Younian
IRIS_313-9482	5327796	29635224	0.1798	China	inc	EAS	XI-1B	E 2024::IRGC 67958-1
IRIS_313-11855	5327655	29635224	0.1798	China	inc	EAS	XI-1A	DA GUAN YIN ZHAN::IRGC 72006-1
B127	5321557	29635224	0.1796	China	inc	EAS	XI-1A	Dangyu 5
IRIS_313-11885	5308804	29635224	0.1791	China	inc	EAS	XI-1A	YANG WAN XIAN::IRGC 72886-1
IRIS_313-12011	5306600	29635224	0.1791	China	inc	EAS	XI-adm	YU TOU ZHONG::IRGC 79749-1
CX115	5300891	29635224	0.1789	China	P	EAS	XI-adm	Yun hui 72
IRIS_313-9017	5295759	29635224	0.1787	China	inc	EAS	XI-adm	PING SHAN TA TSWEN KU::IRGC 1563-1
IRIS_313-11852	5267499	29635224	0.1777	China	inc	EAS	XI-1A	BAI MI ZAI 7::IRGC 71940-1
IRIS_313-12012	5259947	29635224	0.1775	China	inc	EAS	XI-1A	ZAO LENG SHUI ZHAN::IRGC 79756-1
CX318	5252158	29635224	0.1772	China	P	EAS	XI-adm	Heiheaihui
B246	5243019	29635224	0.1769	China	inc	EAS	XI-adm	Laozaogu
CX125	5241971	29635224	0.1769	China	P	EAS	XI-1B	CAOZHAO-2
IRIS_313-12275	5241447	29635224	0.1769	China	inc	EAS	XI-adm	MAGU::IRGC 97027-1
IRIS_313-11985	5239294	29635224	0.1768	China	inc	EAS	XI-adm	LI TOU ZHAN::IRGC 78550-1
B083	5228217	29635224	0.1764	China	inc	EAS	XI-1A	Dongtingwanxian
CX346	5226861	29635224	0.1764	China	P	EAS	XI-adm	SAGC-4
IRIS_313-10129	5224263	29635224	0.1763	China	inc	EAS	XI-1A	SAN SHIH TSI::IRGC 1038-1
IRIS_313-9253	5215351	29635224	0.176	China	inc	EAS	XI-1A	YONG JIN ZAO 3::IRGC 70441-1
IRIS_313-10224	5214819	29635224	0.176	China	inc	EAS	XI-1A	HUA LI ZAO::IRGC 80950-1
B252	5212859	29635224	0.1759	China	inc	EAS	XI-adm	Xiangai B
IRIS_313-8433	5209478	29635224	0.1758	China	inc	EAS	XI-1A	CHANG LE SAN SHU ZAO::IRGC 63561-1
B062	5207542	29635224	0.1757	China	inc	EAS	XI-1A	Nantehao
CX114	5205540	29635224	0.1757	China	P	EAS	XI-1A	Guang Lu Ai 4
CX340	5207802	29635224	0.1757	China	P	EAS	XI-1B	Hua 564
B106	5204958	29635224	0.1756	China	inc	EAS	XI-adm	Wenxiangnuo
IRIS_313-10211	5202809	29635224	0.1756	China	inc	EAS	XI-1A	BAI HE::IRGC 76438-1
IRIS_313-10226	5198899	29635224	0.1754	China	inc	EAS	XI-adm	TONG GU HONG::IRGC 81026-1
IRIS_313-11579	5188969	29635224	0.1751	China	inc	EAS	XI-1A	SHAN GU::IRGC 59870-1
B135	5186282	29635224	0.175	China	inc	EAS	XI-adm	Honggenghangu3
IRIS_313-11869	5181136	29635224	0.1748	China	inc	EAS	XI-1A	MA WEI ZHAN::IRGC 72220-1
IRIS_313-11951	5173974	29635224	0.1746	China	inc	EAS	XI-1A	MIAO ZHAN::IRGC 76691-1
B131	5169023	29635224	0.1744	China	inc	EAS	XI-adm	Aizizhan
IRIS_313-10190	5167621	29635224	0.1744	China	inc	EAS	XI-1A	DENG DENG QI::IRGC 72036-1
CX390	5162961	29635224	0.1742	China	P	EAS	XI-adm	Yuelianggu
IRIS_313-11856	5163626	29635224	0.1742	China	inc	EAS	XI-1A	DA HEI GU::IRGC 72009-1
IRIS_313-11858	5161105	29635224	0.1742	China	inc	EAS	XI-1A	DA TIE ZHAN::IRGC 72029-1
B108	5158868	29635224	0.1741	China	inc	EAS	XI-adm	Xianggu
IRIS_313-11572	5159519	29635224	0.1741	China	inc	EAS	XI-1A	BAI MI TIE QIU::IRGC 59414-1
B140	5156935	29635224	0.174	China	inc	EAS	XI-1A	Pei C122
B114	5154831	29635224	0.1739	China	inc	EAS	XI-1A	Chengduai 3
IRIS_313-10168	5152132	29635224	0.1739	China	inc	EAS	XI-adm	MEI FENG 9::IRGC 63735-1
B121	5131846	29635224	0.1732	China	inc	EAS	XI-1A	Luke 3
IRIS_313-11853	5132000	29635224	0.1732	China	inc	EAS	XI-1A	BU ZHI MING::IRGC 71971-1
B072	5129992	29635224	0.1731	China	inc	EAS	XI-1A	Qiuqianbai
B243	5127514	29635224	0.173	China	inc	EAS	cA (Aus)	Huhui 91269
B119	5116452	29635224	0.1726	China	inc	EAS	XI-1A	Guangluai 15-1
B085	5111591	29635224	0.1725	China	inc	EAS	XI-1A	Xugunuo
CX249	5113361	29635224	0.1725	China	P	EAS	XI-1B	2004
IRIS_313-11868	5111482	29635224	0.1725	China	inc	EAS	XI-1A	LIU LI YOU::IRGC 72198-1
B222	5109691	29635224	0.1724	China	inc	EAS	XI-1A	Beizinuo
IRIS_313-11859	5106381	29635224	0.1723	China	inc	EAS	XI-1A	DONG DU::IRGC 72037-1
IRIS_313-11580	5099142	29635224	0.1721	China	inc	EAS	XI-adm	TAI ZHOU XIAN::IRGC 59912-1
IRIS_313-11965	5093061	29635224	0.1719	China	T	EAS	XI-1A	GUANG XUAN LIU HAO::IRGC 77341-1
B249	5088524	29635224	0.1717	China	inc	EAS	XI-1A	Chaoyangyihao B
B082	5074707	29635224	0.1712	China	inc	EAS	XI-adm	Qiyuexian
CX431	5073534	29635224	0.1712	China	P	EAS	XI-adm	Duoxi 1
IRIS_313-11871	5071612	29635224	0.1711	China	inc	EAS	XI-1A	SAN ZHAO QI::IRGC 72289-1
B156	5066837	29635224	0.171	China	inc	EAS	XI-1A	G Zhenshan 97B
IRIS_313-11860	5068681	29635224	0.171	China	inc	EAS	XI-1A	GUA PAI GU::IRGC 72078-1
IRIS_313-9723	5059822	29635224	0.1707	China	inc	EAS	XI-1A	AI ZI HUNG::IRGC 51255-1
B091	5048966	29635224	0.1704	China	inc	EAS	XI-adm	Xiaohonggu
B128	5029140	29635224	0.1697	China	inc	EAS	XI-adm	Sibeitizhao 6
B164	5026911	29635224	0.1696	China	inc	EAS	cA (Aus)	Qingke
CX305	5026903	29635224	0.1696	China	P	EAS	XI-1B	ZH 5
IRIS_313-11968	5026197	29635224	0.1696	China	T	EAS	XI-1A	ZHAO DAN AI::IRGC 77422-1
IRIS_313-11726	5022014	29635224	0.1695	China	inc	EAS	XI-1A	GUANG QING 334::IRGC 67132-1
B059	5019923	29635224	0.1694	China	inc	EAS	XI-1A	Nanjing 11
CX304	5016171	29635224	0.1693	China	P	EAS	XI-adm	Luyin 46
IRIS_313-8645	5016844	29635224	0.1693	China	T	EAS	XI-1A	PAI YI PING::IRGC 1368-1
IRIS_313-11735	5012896	29635224	0.1692	China	inc	EAS	XI-adm	YI LI ZHONG::IRGC 67382-1
IRIS_313-10154	5011511	29635224	0.1691	China	inc	EAS	XI-1A	HE GU TSAO::IRGC 51302-1
IRIS_313-11570	5010634	29635224	0.1691	China	P	EAS	XI-adm	GENG 77-4::IRGC 59321-1
IRIS_313-11884	5009531	29635224	0.169	China	inc	EAS	XI-1A	TIAN DAO DAO::IRGC 72837-1
B065	5005846	29635224	0.1689	China	inc	EAS	XI-adm	Huangsiguizhan
B115	4996331	29635224	0.1686	China	inc	EAS	XI-1A	Aimakang
B259	4989432	29635224	0.1684	China	inc	EAS	XI-1A	Leihuozhan
IRIS_313-11866	4986998	29635224	0.1683	China	inc	EAS	XI-1A	JIANG ER ZAO::IRGC 72152-1
B064	4985624	29635224	0.1682	China	inc	EAS	XI-adm	Xiangzaoxian 7
IRIS_313-11911	4985892	29635224	0.1682	China	inc	EAS	XI-1A	YUN NAN ZHAN::IRGC 74272-1
CX207	4981379	29635224	0.1681	China	P	EAS	XI-adm	Gaozi
CX313	4971086	29635224	0.1677	China	P	EAS	XI-adm	R106
IRIS_313-11876	4967526	29635224	0.1676	China	inc	EAS	XI-1A	AI DA::IRGC 72567-1
B254	4959693	29635224	0.1674	China	inc	EAS	XI-adm	Jinghu3 B
IRIS_313-12236	4959287	29635224	0.1673	China	inc	EAS	XI-1A	LAOZAOGU::IRGC 93444-1
CX123	4955548	29635224	0.1672	China	P	EAS	XI-1A	Yu Qiu Gu
IRIS_313-10449	4954738	29635224	0.1672	China	P	EAS	XI-1A	CI 7061::IRGC 968-1
B163	4948250	29635224	0.167	China	inc	EAS	XI-1A	Liushizao
B095	4941771	29635224	0.1668	China	inc	EAS	XI-adm	Mowangguneiza
CX118	4938549	29635224	0.1666	China	P	EAS	XI-adm	Yetuozai
IRIS_313-11854	4936020	29635224	0.1666	China	inc	EAS	XI-1A	CHI GU::IRGC 71988-1
B217	4935365	29635224	0.1665	China	inc	EAS	XI-1B	Honggu
IRIS_313-12007	4926868	29635224	0.1663	China	inc	EAS	XI-adm	JIA GEN::IRGC 79654-1
IRIS_313-12232	4922625	29635224	0.1661	China	inc	EAS	XI-adm	TE SAN AI 2::IRGC 93355-1
B092	4919859	29635224	0.166	China	inc	EAS	XI-1A	Gongju 73
B079	4913093	29635224	0.1658	China	inc	EAS	XI-1A	Esiniu
B096	4910811	29635224	0.1657	China	inc	EAS	XI-adm	Jinzhinuo4
IRIS_313-8914	4909064	29635224	0.1656	China	inc	EAS	XI-adm	E 2040::IRGC 67968-1
B150	4897527	29635224	0.1653	China	inc	EAS	XI-1A	L 301B
B074	4887621	29635224	0.1649	China	inc	EAS	XI-1A	Taishannuo
CX314	4887281	29635224	0.1649	China	P	EAS	XI-1B	117
IRIS_313-10561	4881164	29635224	0.1647	China	inc	EAS	XI-1A	NAN TEO 14::IRGC 7304-1
IRIS_313-9727	4878054	29635224	0.1646	China	inc	EAS	XI-1A	NAN TE HAO::IRGC 59797-1
IRIS_313-11881	4875289	29635224	0.1645	China	inc	EAS	XI-1A	LIU TIAO XIAN::IRGC 72758-1
IRIS_313-10239	4872517	29635224	0.1644	China	inc	EAS	XI-adm	LIU XU::IRGC 109232-1
IRIS_313-11870	4868522	29635224	0.1643	China	inc	EAS	XI-1A	NAN JING XIAO DAO::IRGC 72236-2
IRIS_313-11910	4870338	29635224	0.1643	China	inc	EAS	XI-adm	YU HE HONG::IRGC 74266-1
B105	4856476	29635224	0.1639	China	inc	EAS	XI-adm	Baoxuan 21
CX348	4853179	29635224	0.1638	China	P	EAS	XI-1B	Zhonghua 1
IRIS_313-11967	4852188	29635224	0.1637	China	T	EAS	XI-adm	TANG DU GU::IRGC 77400-1
CX342	4840540	29635224	0.1633	China	P	EAS	XI-adm	Wanxian 763
IRIS_313-11947	4840073	29635224	0.1633	China	inc	EAS	XI-adm	BIE LEI::IRGC 76478-1
IRIS_313-10560	4830154	29635224	0.163	China	inc	EAS	XI-1A	TA PAI MAUNG::IRGC 7292-1
B149	4827566	29635224	0.1629	China	inc	EAS	XI-1A	Haoxiang
B090	4820283	29635224	0.1627	China	inc	EAS	XI-adm	Zimi
B229	4821149	29635224	0.1627	China	inc	EAS	XI-adm	Menjiading 2
IRIS_313-11622	4821390	29635224	0.1627	China	inc	EAS	XI-1A	JUAN YE LAI::IRGC 61825-1
IRIS_313-11986	4819022	29635224	0.1626	China	inc	EAS	XI-1A	LIANG GUANG::IRGC 78551-1
B210	4811507	29635224	0.1624	China	inc	EAS	XI-1A	Nanxiongzaoyouzhan
IRIS_313-12234	4805296	29635224	0.1621	China	inc	EAS	XI-1B	ANLINGWUBAILI::IRGC 93363-1
CX328	4794674	29635224	0.1618	China	P	EAS	XI-1A	Baoxuan 21
B116	4791860	29635224	0.1617	China	inc	EAS	XI-adm	Shufeng 101
CX121	4792653	29635224	0.1617	China	P	EAS	XI-1B	Guang122
IRIS_313-10179	4792408	29635224	0.1617	China	inc	EAS	XI-adm	GUI HUA ZAO::IRGC 68060-1
IRIS_313-10221	4790682	29635224	0.1617	China	inc	EAS	XI-adm	BA BAI GU::IRGC 79580-1
IRIS_313-12273	4780109	29635224	0.1613	China	inc	EAS	XI-1A	AIJIAONANTE::IRGC 96974-1
B141	4776689	29635224	0.1612	China	inc	EAS	admix	Geng 7623
B113	4773060	29635224	0.1611	China	inc	EAS	XI-adm	Chenwan 3
IRIS_313-12057	4766978	29635224	0.1609	China	inc	EAS	XI-adm	AI JIAO ZI::IRGC 82255-1
IRIS_313-12237	4767709	29635224	0.1609	China	inc	EAS	XI-1A	WUGU::IRGC 93479-1
IRIS_313-11867	4759442	29635224	0.1606	China	inc	EAS	XI-1A	KE SHU BAI::IRGC 72183-1
CX561	4755642	29635224	0.1605	China	P	EAS	XI-1B	177-74
IRIS_313-10614	4757593	29635224	0.1605	Hong Kong	inc	EAS	XI-adm	HAM MOON::IRGC 9135-2
IRIS_313-9730	4750338	29635224	0.1603	China	inc	EAS	XI-1A	BA SHI ZAO::IRGC 67903-1
IRIS_313-10458	4750353	29635224	0.1603	China	P	EAS	XI-1A	P 168::IRGC 1354-1
IRIS_313-11729	4726991	29635224	0.1595	China	inc	EAS	XI-adm	MEI LIU ZAO 5::IRGC 67231-1
B147	4719324	29635224	0.1592	China	inc	EAS	XI-1A	Baikehanhe
B216	4717162	29635224	0.1592	China	inc	EAS	XI-1A	Hanmadao4
CX48	4710252	29635224	0.1589	China	P	EAS	XI-adm	PT 60
IRIS_313-11954	4702953	29635224	0.1587	China	inc	EAS	XI-1A	XIA HONG GU::IRGC 76803-1
CX133	4663922	29635224	0.1574	China	I	EAS	XI-1A	Zhengshan97
IRIS_313-11909	4661438	29635224	0.1573	China	inc	EAS	XI-1A	HONG MI JIU GONG JI::IRGC 74031-1
B157	4655327	29635224	0.1571	China	inc	EAS	XI-1A	88B
B061	4648509	29635224	0.1569	China	inc	EAS	XI-1A	Guangluai 4
B089	4650752	29635224	0.1569	China	inc	EAS	XI-adm	Qitoubaigu3
IRIS_313-9324	4641599	29635224	0.1566	China	T	EAS	XI-1A	CHIH SHEN LI::IRGC 1306-1
IRIS_313-11966	4633210	29635224	0.1563	China	T	EAS	XI-1A	QI GU::IRGC 77381-1
IRIS_313-9469	4623209	29635224	0.156	China	T	EAS	XI-1A	TSAO SHENG LI 1::IRGC 1309-1
B144	4608813	29635224	0.1555	China	inc	EAS	GJ-adm	Huhui 628
CX101	4605183	29635224	0.1554	China	P	EAS	XI-1A	Hei Mi Chan
IRIS_313-9372	4606437	29635224	0.1554	China	inc	EAS	XI-1A	WI BIR SHUN::IRGC 4602-1
B208	4593821	29635224	0.155	China	inc	EAS	XI-1A	Lucaihao
CX221	4591969	29635224	0.1549	China	P	EAS	XI-adm	Zhongyouzao 81
B107	4588955	29635224	0.1548	China	inc	EAS	XI-adm	Dawannuo
IRIS_313-11877	4586268	29635224	0.1548	China	inc	EAS	XI-1A	AN NAN ZAO::IRGC 72576-1
B073	4583052	29635224	0.1546	China	inc	EAS	XI-adm	Jinxibai2
IRIS_313-11038	4562640	29635224	0.154	China	P	EAS	XI-1A	AI NAN TSAO 39::IRGC 28461-2
B129	4545184	29635224	0.1534	China	inc	EAS	XI-adm	Hongainuo
IRIS_313-12009	4544205	29635224	0.1533	China	inc	EAS	XI-1A	PO HE::IRGC 79701-1
IRIS_313-11882	4525622	29635224	0.1527	China	inc	EAS	XI-1A	MAN TIAN QING::IRGC 72776-1
IRIS_313-10189	4519172	29635224	0.1525	China	inc	EAS	XI-1A	DA NUO (ZHAN)::IRGC 72025-1
CX347	4501113	29635224	0.1519	China	P	EAS	XI-adm	SAGC-7
CX10	4492821	29635224	0.1516	China	P	EAS	XI-1A	Gang 46B
IRIS_313-11950	4477058	29635224	0.1511	China	inc	EAS	XI-1A	MI GU::IRGC 76687-1
IRIS_313-11949	4471245	29635224	0.1509	China	inc	EAS	XI-1A	LIU HE XI HE::IRGC 76661-1
IRIS_313-11952	4470510	29635224	0.1509	China	inc	EAS	XI-1A	QI YUE ZHAN::IRGC 76722-1
IRIS_313-11878	4457370	29635224	0.1504	China	inc	EAS	XI-1A	BAI RI XIAN::IRGC 72588-1
IRIS_313-10503	4451562	29635224	0.1502	China	inc	EAS	XI-1A	HA GOO::IRGC 4577-1
B097	4437886	29635224	0.1498	China	inc	EAS	XI-adm	Jiienuo
CX13	4440482	29635224	0.1498	China	P	EAS	XI-adm	R644
IRIS_313-11955	4436014	29635224	0.1497	China	inc	EAS	XI-1A	YE DA GU::IRGC 76834-1
IRIS_313-12033	4416092	29635224	0.149	China	inc	EAS	XI-1A	GAO JIAO HONG::IRGC 80920-1
B261	4410480	29635224	0.1488	China	inc	EAS	XI-1A	Meihuanuo
IRIS_313-8940	4408496	29635224	0.1488	China	inc	EAS	XI-1A	FU ZAO XIAN::IRGC 63619-1
B264	4404285	29635224	0.1486	China	inc	EAS	XI-1A	Sanbaili
CX250	4400395	29635224	0.1485	China	P	EAS	XI-1B	829
IRIS_313-9570	4397300	29635224	0.1484	China	inc	EAS	XI-adm	NX 3533::IRGC 63796-1
IRIS_313-12010	4395971	29635224	0.1483	China	inc	EAS	XI-1A	YAN ZHAN::IRGC 79740-1
CX303	4393132	29635224	0.1482	China	P	EAS	XI-adm	LX 2007
B081	4389312	29635224	0.1481	China	inc	EAS	XI-1A	Heidu 4
B253	4390037	29635224	0.1481	China	inc	EAS	XI-adm	Jiangnongzao 1 B
CX290	4386810	29635224	0.148	China	P	EAS	XI-1B	Duo 57
IRIS_313-11953	4381960	29635224	0.1479	China	inc	EAS	XI-1A	SAN BAO GU::IRGC 76732-1
B214	4364991	29635224	0.1473	China	inc	EAS	XI-1B	Xuanenchangtanqingzhan
IRIS_313-11666	4324963	29635224	0.1459	China	inc	EAS	XI-adm	LONG GE 33::IRGC 63705-1
B076	4319755	29635224	0.1458	China	inc	EAS	XI-adm	Minbeiwanxian
B247	4310950	29635224	0.1455	China	inc	EAS	XI-adm	Jinnante B
CX291	4296928	29635224	0.145	China	P	EAS	XI-adm	D 15
IRIS_313-10583	4291424	29635224	0.1448	China	inc	EAS	GJ-tmp	TSAO SIAO PEH TAO::IRGC 8265-2
B094	4254800	29635224	0.1436	China	inc	EAS	XI-1A	Zinuo
CX365	4255264	29635224	0.1436	China	P	EAS	admix	Compact Plant Type Material
IRIS_313-11806	4237923	29635224	0.143	China	inc	EAS	XI-1A	78 XUAN WU::IRGC 70475-1
B130	4234727	29635224	0.1429	China	inc	EAS	XI-1A	Wanlixian
IRIS_313-11799	4198384	29635224	0.1417	China	inc	EAS	XI-1A	E ZI 110::IRGC 70201-1
B123	4196024	29635224	0.1416	China	inc	EAS	XI-adm	Zaoshuxiangheimi
IRIS_313-11733	4166029	29635224	0.1406	China	inc	EAS	XI-1A	SHUANG BAI AI 2::IRGC 67309-1
IRIS_313-11039	4149659	29635224	0.14	China	I	EAS	XI-1A	KWANG LU AI 4::IRGC 28480-2
B265	4146673	29635224	0.1399	China	inc	EAS	XI-adm	Wukezhan
IRIS_313-11667	4135156	29635224	0.1395	China	inc	EAS	XI-1A	LUO AI ZAO 3::IRGC 63730-1
IRIS_313-11734	4105650	29635224	0.1385	China	inc	EAS	XI-1A	SI CHAO 1::IRGC 67335-1
B125	4098101	29635224	0.1383	China	inc	EAS	XI-adm	Xiangwanxian 3
IRIS_313-11795	4092071	29635224	0.1381	China	inc	EAS	XI-1A	DA GU AI 7::IRGC 70075-1
IRIS_313-10171	4077325	29635224	0.1376	China	inc	EAS	XI-1A	YA NONG ZAO 4::IRGC 63908-1
CX367	4069942	29635224	0.1373	China	P	EAS	GJ-trp	Haogelao
IRIS_313-11798	4069379	29635224	0.1373	China	inc	EAS	XI-1B	E ZI 100::IRGC 70192-1
IRIS_313-11732	4044652	29635224	0.1365	China	inc	EAS	XI-1A	QING ZAO 3::IRGC 67281-1
CX384	3987686	29635224	0.1346	China	P	EAS	GJ-tmp	Fengza
IRIS_313-11751	3971790	29635224	0.134	China	inc	EAS	XI-adm	L 10833::IRGC 68121-1
IRIS_313-11753	3968325	29635224	0.1339	China	inc	EAS	XI-1A	XIANG CHANG ZAO::IRGC 68268-1
IRIS_313-11728	3961795	29635224	0.1337	China	inc	EAS	XI-3	LUO SI ZHAN::IRGC 67211-1
IRIS_313-11750	3961996	29635224	0.1337	China	inc	EAS	XI-adm	L 10595::IRGC 68109-1
IRIS_313-11804	3955717	29635224	0.1335	China	inc	EAS	XI-1A	QUN XUAN ZAO::IRGC 70371-1
IRIS_313-11747	3953671	29635224	0.1334	China	inc	EAS	XI-adm	E 4197::IRGC 68004-1
IRIS_313-11664	3909044	29635224	0.1319	China	inc	EAS	XI-adm	CUN GU NUO::IRGC 63576-1
B221	3895567	29635224	0.1315	China	inc	EAS	XI-1A	Fanhaopi
IRIS_313-11665	3890498	29635224	0.1313	China	inc	EAS	XI-1A	JIN HUA 258::IRGC 63670-1
IRIS_313-11746	3889607	29635224	0.1312	China	inc	EAS	XI-1A	E 2070::IRGC 67981-1
IRIS_313-10177	3883134	29635224	0.131	China	inc	EAS	XI-adm	DA GANG ZHAN::IRGC 67103-1
IRIS_313-11797	3882669	29635224	0.131	China	inc	EAS	XI-1A	E ZI 32::IRGC 70127-1
IRIS_313-11730	3865920	29635224	0.1305	China	inc	EAS	XI-adm	QING ER XIAO 2::IRGC 67255-1
IRIS_313-11748	3860522	29635224	0.1303	China	inc	EAS	XI-adm	GAO JIAO YING GAN ZHAN::IRGC 68053-1
IRIS_313-11727	3854286	29635224	0.1301	China	inc	EAS	XI-1A	HONG YANG ZAO 3::IRGC 67177-1
IRIS_313-11752	3853528	29635224	0.13	China	inc	EAS	XI-1A	M 6034-1::IRGC 68193-1
B101	3849234	29635224	0.1299	China	inc	EAS	GJ-tmp	Yangkenuo
IRIS_313-11731	3846255	29635224	0.1298	China	inc	EAS	XI-adm	QING TAI AI::IRGC 67273-1
B086	3842245	29635224	0.1297	China	inc	EAS	admix	Muguanuo
IRIS_313-11805	3835829	29635224	0.1294	China	inc	EAS	XI-1A	XI HONG GU::IRGC 70416-1
IRIS_313-11801	3832249	29635224	0.1293	China	inc	EAS	XI-adm	FAN WU::IRGC 70245-1
IRIS_313-11745	3794291	29635224	0.128	China	inc	EAS	XI-1A	AN FU ZHAN::IRGC 67878-1
B199	3791146	29635224	0.1279	China	inc	EAS	GJ-tmp	Hongmisandan
CX49	3761940	29635224	0.1269	China	P	EAS	GJ-tmp	NAN-29-2
IRIS_313-11744	3759119	29635224	0.1268	China	inc	EAS	XI-adm	AI JIAO AO FAN ZI::IRGC 67871-1
IRIS_313-11796	3726379	29635224	0.1257	China	inc	EAS	XI-1A	DU GEN CHUAN::IRGC 70083-1
B142	3702629	29635224	0.1249	China	inc	EAS	admix	Ninghui 21
CX542	3698116	29635224	0.1248	China	P	EAS	XI-adm	RR2-6
IRIS_313-11668	3693577	29635224	0.1246	China	inc	EAS	XI-1A	RONG DAO 4::IRGC 63820-1
CX359	3660950	29635224	0.1235	China	P	EAS	GJ-trp	Yunlu 103
IRIS_313-11802	3618332	29635224	0.1221	China	inc	EAS	XI-1A	JIE CAO ZHAN::IRGC 70305-1
CX355	3547332	29635224	0.1197	China	P	EAS	GJ-trp	Yunlu 102
IRIS_313-10196	3459554	29635224	0.1167	China	inc	EAS	GJ-trp	GUO DI HEI::IRGC 72697-1
IRIS_313-10562	3451418	29635224	0.1165	China	inc	EAS	GJ-adm	SENG CHUI LIN::IRGC 7313-1
B117	3410083	29635224	0.1151	China	inc	EAS	GJ-tmp	Lixingeng
B084	3342396	29635224	0.1128	China	inc	EAS	admix	Bawangbian 1
CX395	3339565	29635224	0.1127	China	P	EAS	admix	YSBR 1
CX352	3297673	29635224	0.1113	China	P	EAS	GJ-trp	BD 007
B148	3264484	29635224	0.1102	China	inc	EAS	GJ-adm	Lengshuinuo
IRIS_313-11623	3207463	29635224	0.1082	China	inc	EAS	GJ-sbtrp	KAO SONG HAI::IRGC 61827-1
IRIS_313-11669	3196718	29635224	0.1079	China	I	EAS	XI-adm	F 478::IRGC 63882-1
B134	3173055	29635224	0.1071	China	inc	EAS	GJ-sbtrp	Xishi 15
IRIS_313-11584	3160019	29635224	0.1066	China	inc	EAS	GJ-tmp	YI SUI QI::IRGC 60088-1
IRIS_313-10453	3148718	29635224	0.1062	China	T	EAS	GJ-adm	LU TAO 2::IRGC 1175-1
B102	3136153	29635224	0.1058	China	inc	EAS	GJ-tmp	Maguzi
B241	3129958	29635224	0.1056	China	inc	EAS	GJ-sbtrp	Lamujia
IRIS_313-11578	3110225	29635224	0.105	China	inc	EAS	GJ-tmp	LUAN DAO::IRGC 59762-1
CX57	3077351	29635224	0.1038	China	P	EAS	GJ-tmp	Zhongchao 123
IRIS_313-9724	3071956	29635224	0.1037	China	inc	EAS	GJ-tmp	AI DA ZHONG::IRGC 59348-1
B245	3061078	29635224	0.1033	China	inc	EAS	GJ-sbtrp	Shanjiugu
CX6	3041698	29635224	0.1026	China	P	EAS	admix	C418
B205	3039086	29635224	0.1025	China	inc	EAS	GJ-adm	Cunsanli
B077	3035498	29635224	0.1024	China	inc	EAS	GJ-tmp	Yizhixiang
CX210	3031934	29635224	0.1023	China	P	EAS	admix	Qb_604
B069	3019314	29635224	0.1019	China	inc	EAS	GJ-adm	Dandongludao
IRIS_313-9140	3018138	29635224	0.1018	China	I	EAS	GJ-tmp	81 A 32::IRGC 60162-1
IRIS_313-9233	2998374	29635224	0.1012	China	T	EAS	GJ-tmp	CHUNG YI::IRGC 1427-1
B136	2997571	29635224	0.1011	China	inc	EAS	GJ-adm	Yuyannuo
B266	2991793	29635224	0.101	China	inc	EAS	GJ-sbtrp	Haomake (K)
CX351	2992363	29635224	0.101	China	I	EAS	GJ-tmp	053 A-3
B109	2989930	29635224	0.1009	China	inc	EAS	GJ-adm	Lengshuigu 2
IRIS_313-11574	2945691	29635224	0.0994	China	inc	EAS	GJ-tmp	HEI TOU HONG::IRGC 59595-1
CX284	2925593	29635224	0.09872	China	P	EAS	GJ-adm	Han 502
B212	2923483	29635224	0.09865	China	inc	EAS	GJ-tmp	Chikenuo
B143	2893039	29635224	0.09762	China	inc	EAS	GJ-tmp	76--1
CX16	2883391	29635224	0.0973	China	P	EAS	GJ-tmp	Yuan jing 7
IRIS_313-8387	2875496	29635224	0.09703	China	inc	EAS	GJ-tmp	FU LI HONG::IRGC 70250-1
B215	2823179	29635224	0.09526	China	inc	EAS	GJ-tmp	Hongqi 5
CX286	2807520	29635224	0.09474	China	P	EAS	admix	C 349
B223	2804504	29635224	0.09463	China	inc	EAS	GJ-tmp	Cungunuo
B103	2780522	29635224	0.09382	China	inc	EAS	GJ-tmp	Laohongdao
B230	2772482	29635224	0.09355	China	inc	EAS	GJ-adm	Banjiemang2
B068	2749318	29635224	0.09277	China	inc	EAS	GJ-tmp	Gaoyangdiandao dahongmang
IRIS_313-11571	2740161	29635224	0.09246	China	inc	EAS	GJ-tmp	BAI MANG AI ZHONG::IRGC 59408-1
IRIS_313-10558	2739825	29635224	0.09245	China	inc	EAS	GJ-tmp	LITCHIKIANG::IRGC 7287-1
CX11	2724814	29635224	0.09195	China	P	EAS	GJ-adm	Gumei 2
B152	2724068	29635224	0.09192	China	inc	EAS	GJ-tmp	Zaoshunonghu 6
IRIS_313-10559	2714086	29635224	0.09158	China	inc	EAS	GJ-tmp	FI LAI FENG::IRGC 7288-1
B110	2709845	29635224	0.09144	China	inc	EAS	GJ-tmp	Huangpinuo
CX14	2708085	29635224	0.09138	China	P	EAS	GJ-tmp	Chennong 265
B056	2698467	29635224	0.09106	China	inc	EAS	GJ-tmp	Tieganwu
B161	2684397	29635224	0.09058	China	inc	EAS	GJ-tmp	Yelicanghua
IRIS_313-11803	2675112	29635224	0.09027	China	inc	EAS	GJ-tmp	MAO ZHA NUO::IRGC 70335-1
CX282	2668325	29635224	0.09004	China	P	EAS	GJ-adm	Lijiangxintuanheigu
CX285	2667603	29635224	0.09001	China	P	EAS	GJ-trp	Nonglinnuo
IRIS_313-9725	2666251	29635224	0.08997	China	inc	EAS	GJ-tmp	DA DAO TOU::IRGC 59499-1
IRIS_313-11582	2647233	29635224	0.08933	China	inc	EAS	GJ-tmp	WAN GENG BAI DAO TOU::IRGC 59948-1
B225	2622742	29635224	0.0885	China	inc	EAS	GJ-tmp	Guantuibaihe 1
CX380	2622345	29635224	0.08849	China	P	EAS	GJ-tmp	Yandao 9
CX142	2608021	29635224	0.088	China	P	EAS	GJ-adm	Ai Yeh Lu
CX345	2604349	29635224	0.08788	China	P	EAS	GJ-tmp	Yungeng 23
B240	2557077	29635224	0.08629	China	inc	EAS	GJ-tmp	Zhengdao 5
IRIS_313-11575	2537034	29635224	0.08561	China	inc	EAS	GJ-tmp	HONG PI NUO::IRGC 59638-1
B226	2530248	29635224	0.08538	China	inc	EAS	GJ-tmp	Heimangdao
B057	2528655	29635224	0.08533	China	inc	EAS	GJ-tmp	Xiushui 115
B258	2521000	29635224	0.08507	China	inc	EAS	GJ-tmp	Xingguo
B003	2511413	29635224	0.08474	China	inc	EAS	GJ-adm	Zaoshengbai
B070	2503146	29635224	0.08447	China	inc	EAS	GJ-adm	Laoguangtou 83
B111	2494913	29635224	0.08419	China	inc	EAS	GJ-tmp	Zimangfeie
B124	2477154	29635224	0.08359	China	inc	EAS	GJ-tmp	Geng 87-304
B204	2463103	29635224	0.08311	China	inc	EAS	GJ-tmp	Longhuamaohu
CX47	2454379	29635224	0.08282	China	P	EAS	GJ-tmp	Diangeng
B071	2443050	29635224	0.08244	China	inc	EAS	GJ-tmp	Muxiqiu
IRIS_313-11908	2418432	29635224	0.08161	China	inc	EAS	GJ-tmp	DUAN SHEN ZI::IRGC 73962-1
IRIS_313-11522	2410371	29635224	0.08133	China	inc	EAS	GJ-adm	XINTUAN HEI GU::IRGC 56159-1
B162	2399829	29635224	0.08098	China	inc	EAS	GJ-tmp	Baigedao
B066	2362921	29635224	0.07973	China	inc	EAS	GJ-tmp	Guangkexiangnuo
IRIS_313-10563	2356011	29635224	0.0795	China	P	EAS	GJ-tmp	SHA TIAO TSAO::IRGC 7339-1
CX389	2344346	29635224	0.07911	China	P	EAS	GJ-tmp	Jinyuan 85
B100	2336819	29635224	0.07885	China	inc	EAS	GJ-tmp	Hongkezhenuo
IRIS_313-10228	2302713	29635224	0.0777	China	inc	EAS	GJ-tmp	HAN NUO::IRGC 82350-1
IRIS_313-11201	2274524	29635224	0.07675	China	I	EAS	GJ-tmp	CHING HSI 15::IRGC 36852-1
IRIS_313-12059	2267880	29635224	0.07653	China	inc	EAS	GJ-tmp	LIGEN 2::IRGC 82398-1
CX391	2264628	29635224	0.07642	China	P	EAS	GJ-tmp	YJ 30
B228	2255647	29635224	0.07611	China	inc	EAS	GJ-adm	Haobayong 1
CX138	2254224	29635224	0.07607	China	P	EAS	GJ-adm	Qd_441
IRIS_313-10459	2238886	29635224	0.07555	China	I	EAS	GJ-adm	PI 160862-1::IRGC 1452-1
IRIS_313-9468	2225360	29635224	0.07509	China	I	EAS	GJ-tmp	NONG KE::IRGC 59807-1
B218	2222100	29635224	0.07498	China	inc	EAS	GJ-tmp	Wuzidui
CX277	2216751	29635224	0.0748	China	I	EAS	GJ-adm	02428-IL
B263	2209357	29635224	0.07455	China	inc	EAS	GJ-tmp	Weiguo
B122	2193787	29635224	0.07403	China	inc	EAS	GJ-tmp	Liaogeng 287
CX56	2177900	29635224	0.07349	China	P	EAS	GJ-tmp	Yunguang 8
CX350	2177043	29635224	0.07346	China	P	EAS	GJ-tmp	Wuyugeng 20
IRIS_313-12060	2170172	29635224	0.07323	China	inc	EAS	GJ-adm	LIJIAN 942::IRGC 82399-1
IRIS_313-11586	2149254	29635224	0.07252	China	I	EAS	GJ-tmp	36037-1::IRGC 60177-2
CX165	2134181	29635224	0.07202	China	P	EAS	GJ-tmp	Wuyugeng 3
CX4	2123601	29635224	0.07166	China	P	EAS	XI-adm	93072
CX211	2112396	29635224	0.07128	China	P	EAS	GJ-tmp	M 3122
CX213	2097561	29635224	0.07078	China	P	EAS	GJ-tmp	Chennong 89366
IRIS_313-11652	2078091	29635224	0.07012	China	inc	EAS	GJ-tmp	GONG SHE 9::IRGC 62693-1
B154	2050095	29635224	0.06918	China	inc	EAS	GJ-tmp	Liming B
CX306	2017518	29635224	0.06808	China	P	EAS	GJ-tmp	Mongolia Rice
CX429	1997488	29635224	0.0674	China	P	EAS	GJ-tmp	shen-nong 1033
CX287	1974859	29635224	0.06664	China	P	EAS	GJ-tmp	C52
IRIS_313-10164	1890038	29635224	0.06378	China	inc	EAS	GJ-tmp	HAN NUO::IRGC 59591-1
B235	1885907	29635224	0.06364	China	inc	EAS	GJ-tmp	Zhonghua 8
CX344	1861252	29635224	0.06281	China	P	EAS	GJ-tmp	Hexi 41
CX307	1831529	29635224	0.0618	China	P	EAS	GJ-adm	HP 121
CX356	1825371	29635224	0.06159	China	P	EAS	GJ-tmp	Yandao 8
B002	1804162	29635224	0.06088	China	inc	EAS	GJ-tmp	Sansuijin
CX329	1797475	29635224	0.06065	China	P	EAS	GJ-tmp	Jinchuanyihao
IRIS_313-8140	1791614	29635224	0.06046	China	inc	EAS	GJ-tmp	SANGHAI::GERVEX 1264-C1
IRIS_313-11655	1771738	29635224	0.05978	China	inc	EAS	GJ-tmp	SI WAN 14::IRGC 63019-1
IRIS_313-12061	1741174	29635224	0.05875	China	inc	EAS	GJ-tmp	YUNLEN 13::IRGC 82402-1
IRIS_313-11654	1714540	29635224	0.05785	China	inc	EAS	GJ-tmp	PL 3165::IRGC 62827-1
IRIS_313-12054	1702077	29635224	0.05743	China	I	EAS	GJ-tmp	HUA 24::IRGC 82127-1
CX383	1685367	29635224	0.05687	China	P	EAS	GJ-tmp	Hongza
IRIS_313-8162	1682647	29635224	0.05678	China	inc	EAS	GJ-tmp	RPC 12::GERVEX 1505-C1
IRIS_313-11202	1672565	29635224	0.05644	China	I	EAS	GJ-tmp	4583::IRGC 36894-2
B160	1670918	29635224	0.05638	China	inc	EAS	GJ-tmp	Shuiyuan 300Li
B236	1666038	29635224	0.05622	China	inc	EAS	GJ-tmp	Jindao 1
IRIS_313-11653	1627817	29635224	0.05493	China	inc	EAS	GJ-tmp	MA SHE 8::IRGC 62750-1
CX397	1608623	29635224	0.05428	China	P	EAS	GJ-tmp	Nangeng 46 (Soft Rice)
CX534	1568300	29635224	0.05292	China	P	EAS	GJ-tmp	Tongnian 1
B001	1528882	29635224	0.05159	China	inc	EAS	GJ-tmp	Heibiao
IRIS_313-8481	1526564	29635224	0.05151	China	inc	EAS	GJ-tmp	DAN YAN NUO::IRGC 4860-1
B250	1493702	29635224	0.0504	China	inc	EAS	GJ-tmp	Annongwangeng B
IRIS_313-11931	1486294	29635224	0.05015	China	inc	EAS	GJ-tmp	PEI ZAO 15::IRGC 75247-1
CX251	1476603	29635224	0.04983	China	P	EAS	GJ-tmp	Xudao 4
IRIS_313-11800	1352426	29635224	0.04564	China	inc	EAS	GJ-tmp	FAN GENG 6::IRGC 70243-1
IRIS_313-11651	1215298	29635224	0.04101	China	inc	EAS	GJ-tmp	FEI ZHAO 12::IRGC 62683-1
IRIS_313-10002	7524829	29635224	0.2539	Sri Lanka	P	IOC	XI-1B	BW 295-5::IRGC 63098-1
IRIS_313-10720	6915191	29635224	0.2333	Sri Lanka	T	IOC	XI-adm	HEENDIKWEE::IRGC 15587-2
CX21	6898103	29635224	0.2328	Sri Lanka	P	IOC	XI-1B	BG 90-2
IRIS_313-9832	6698700	29635224	0.226	Sri Lanka	T	IOC	XI-2	RANGOON SAMBA::IRGC 11940-1
IRIS_313-11110	6381115	29635224	0.2153	Sri Lanka	T	IOC	XI-2	SAYAM::IRGC 31538-2
IRIS_313-9809	6174358	29635224	0.2083	Sri Lanka	T	IOC	XI-3	NALUMOOLAI KARUPAN::IRGC 8993-1
IRIS_313-12278	6139121	29635224	0.2072	Madagascar	inc	IOC	XI-2	MENALAVA::IRGC 97122-3
IRIS_313-9636	6088858	29635224	0.2055	Sri Lanka	T	IOC	cA (Aus)	PODI HEENATI::IRGC 36345-1
IRIS_313-9861	6023612	29635224	0.2033	Sri Lanka	T	IOC	cA (Aus)	KURKARUPPAN::IRGC 15449-1
IRIS_313-8783	6022878	29635224	0.2032	Sri Lanka	T	IOC	admix	105::IRGC 40896-1
IRIS_313-9388	5909684	29635224	0.1994	Madagascar	inc	IOC	XI-2	VARY MALADY MENA::IRGC 51555-1
IRIS_313-12282	5884523	29635224	0.1986	Madagascar	inc	IOC	XI-adm	TSY MILA RO::IRGC 97233-1
IRIS_313-10662	5872551	29635224	0.1982	Sri Lanka	T	IOC	XI-2	KAHATAWEE::IRGC 12004-1
IRIS_313-8244	5799968	29635224	0.1957	Sri Lanka	T	IOC	XI-2	POKKALI::IRGC 8948-1
IRIS_313-12280	5730856	29635224	0.1934	Madagascar	inc	IOC	XI-adm	MAKALIOKA::IRGC 97193-1
CX75	5707980	29635224	0.1926	Sri Lanka	P	IOC	XI-adm	At 354
IRIS_313-10102	5655313	29635224	0.1908	Madagascar	inc	IOC	XI-2	KELIRENY::IRGC 78426-1
CX76	5608292	29635224	0.1892	Sri Lanka	P	IOC	XI-1B	BG 304
IRIS_313-9862	5608103	29635224	0.1892	Sri Lanka	T	IOC	XI-2	MODDAI KARUPPAN::IRGC 15465-1
IRIS_313-8342	5570980	29635224	0.188	Sri Lanka	T	IOC	cA (Aus)	KURULU WEE (WHITE)::IRGC 66518-1
IRIS_313-10661	5564236	29635224	0.1878	Sri Lanka	T	IOC	XI-2	SAMBA::IRGC 11993-1
IRIS_313-10721	5561086	29635224	0.1877	Sri Lanka	T	IOC	XI-2	HALSUDU HEENATI::IRGC 15599-1
IRIS_313-8968	5502808	29635224	0.1857	Sri Lanka	T	IOC	XI-2	KALU ILANKALAYAN::IRGC 36270-1
CX35	5490951	29635224	0.1853	Sri Lanka	P	IOC	XI-adm	BG 94-1
IRIS_313-9969	5491969	29635224	0.1853	Sri Lanka	T	IOC	XI-adm	PUTTU NELLU::IRGC 55346-1
IRIS_313-11793	5487017	29635224	0.1852	Madagascar	T	IOC	XI-2	KOMALIOKO::IRGC 69958-1
IRIS_313-10678	5437391	29635224	0.1835	Madagascar	inc	IOC	XI-2	MAKALIOKA::IRGC 12781-2
IRIS_313-10476	5406224	29635224	0.1824	Sri Lanka	I	IOC	XI-2	PACHCHAIPERUMAL 2462-11::IRGC 3474-1
IRIS_313-8660	5368364	29635224	0.1811	Sri Lanka	T	IOC	XI-2	KOTTEYARAN::IRGC 47383-1
IRIS_313-8699	5364787	29635224	0.181	Sri Lanka	T	IOC	XI-adm	BALASURIYA A::IRGC 66509-1
IRIS_313-10716	5288899	29635224	0.1785	Sri Lanka	T	IOC	XI-2	MURUNGA::IRGC 15428-1
IRIS_313-9867	5288197	29635224	0.1784	Sri Lanka	T	IOC	XI-1B	SIGARDIS::IRGC 15555-1
IRIS_313-11977	5280564	29635224	0.1782	Madagascar	T	IOC	XI-adm	MAMORIAKA::IRGC 77867-1
IRIS_313-12284	5276948	29635224	0.1781	Madagascar	inc	IOC	XI-2	VARY GONY::IRGC 97308-2
IRIS_313-9709	5248583	29635224	0.1771	Madagascar	P	IOC	XI-2	MAKALIOKA::IRGC 376-1
CX34	5245839	29635224	0.177	Sri Lanka	P	IOC	XI-adm	BG 300
IRIS_313-12283	5243339	29635224	0.1769	Madagascar	inc	IOC	XI-adm	VARY 5000 FOTSY::IRGC 97235-1
IRIS_313-7728	5234288	29635224	0.1766	Madagascar	T	IOC	XI-2	MAMORIAKA 114::GERVEX 5176-C1
IRIS_313-9091	5222601	29635224	0.1762	Sri Lanka	T	IOC	XI-adm	SINNA SITHIRA KALI::IRGC 51064-1
IRIS_313-7720	5217627	29635224	0.1761	Madagascar	inc	IOC	XI-2	LAITRA::GERVEX 8400-C1
IRIS_313-9732	5208582	29635224	0.1758	Madagascar	inc	IOC	XI-2	MAMORIAKA::IRGC 68672-1
IRIS_313-9970	5206829	29635224	0.1757	Sri Lanka	T	IOC	XI-2	RACE PERUMAL::IRGC 55347-1
IRIS_313-11510	5204968	29635224	0.1756	Sri Lanka	P	IOC	XI-adm	A 69-1::IRGC 55305-1
IRIS_313-10715	5169446	29635224	0.1744	Sri Lanka	T	IOC	XI-2	SUDU KARAYAL::IRGC 15348-1
IRIS_313-10298	5148305	29635224	0.1737	Sri Lanka	inc	IOC	XI-1B	3210::IRGC 116950-1
IRIS_313-9740	5136838	29635224	0.1733	Madagascar	T	IOC	XI-2	ROJOFOTSY::IRGC 69402-1
IRIS_313-10610	5133868	29635224	0.1732	Sri Lanka	T	IOC	XI-2	ALAGUSAMBA::IRGC 8944-2
IRIS_313-10030	5116999	29635224	0.1727	Madagascar	inc	IOC	XI-2	NS 252::IRGC 68878-1
IRIS_313-9256	5111735	29635224	0.1725	Sri Lanka	T	IOC	XI-adm	GALWAKA HANDERAN::IRGC 31381-1
IRIS_313-7793	5102218	29635224	0.1722	Madagascar	inc	IOC	XI-2	TSIPALA B 160::GERVEX 8378-C1
IRIS_313-10050	5084675	29635224	0.1716	Madagascar	T	IOC	XI-adm	TSIMATAHOPAOSA::IRGC 69884-1
IRIS_313-11382	5070090	29635224	0.1711	Sri Lanka	T	IOC	XI-adm	HONDERAWALA::IRGC 47372-1
IRIS_313-10717	5044485	29635224	0.1702	Sri Lanka	T	IOC	XI-2	PERIYA VELLAI::IRGC 15475-1
CX238	5007084	29635224	0.169	Sri Lanka	P	IOC	XI-1B	BW 311-9
B052	4949404	29635224	0.167	Madagascar	inc	IOC	XI-2	J 34
IRIS_313-7792	4943615	29635224	0.1668	Madagascar	T	IOC	XI-adm	TSIPALA 1231::GERVEX 8418-C1
IRIS_313-10719	4938753	29635224	0.1667	Sri Lanka	T	IOC	XI-2	VELLAI KOLOMBAN::IRGC 15517-1
IRIS_313-10718	4929737	29635224	0.1663	Sri Lanka	T	IOC	cA (Aus)	KARUTHA SEENATI::IRGC 15515-2
IRIS_313-8288	4925104	29635224	0.1662	Madagascar	P	IOC	XI-adm	AVO::IRGC 11000-1
B033	4922697	29635224	0.1661	Sri Lanka	P	IOC	XI-1B	BW 293-2
IRIS_313-11766	4920463	29635224	0.166	Madagascar	inc	IOC	admix	TSIMIAKABIJA::IRGC 69074-1
IRIS_313-12083	4916238	29635224	0.1659	Madagascar	T	IOC	XI-2	SARIN TSIPALA::IRGC 83154-1
IRIS_313-9831	4896276	29635224	0.1652	Sri Lanka	T	IOC	XI-adm	PODIWEE::IRGC 11938-1
IRIS_313-9968	4890475	29635224	0.165	Sri Lanka	T	IOC	XI-adm	KULA KARUPPAN::IRGC 55328-1
IRIS_313-9551	4874168	29635224	0.1645	Madagascar	inc	IOC	XI-2	BENGALY MORIMO::IRGC 10976-1
IRIS_313-7799	4844953	29635224	0.1635	Madagascar	inc	IOC	XI-2	VARY LAVA DE MAROVATO::GERVEX 8396-C1
IRIS_313-9936	4831757	29635224	0.163	Sri Lanka	inc	IOC	XI-2	SITHAIYAN KOTTAI SAMBA::IRGC 50155-1
IRIS_313-7795	4775421	29635224	0.1611	Madagascar	T	IOC	XI-2	TSIPALA MENA 626::GERVEX 5392-C1
IRIS_313-10020	4743685	29635224	0.1601	Sri Lanka	T	IOC	cA (Aus)	HODARAWALA::IRGC 67631-1
IRIS_313-12082	4744444	29635224	0.1601	Madagascar	T	IOC	XI-2	MAVOLATSIKA::IRGC 83137-1
IRIS_313-11916	4732938	29635224	0.1597	Sri Lanka	T	IOC	XI-2	MUDALIGA WEE::IRGC 74706-1
IRIS_313-7651	4716628	29635224	0.1592	Madagascar	inc	IOC	XI-2	BOTRA MAITSO::GERVEX 8389-C1
IRIS_313-7758	4718360	29635224	0.1592	Madagascar	inc	IOC	XI-2	ROJOKELY::GERVEX 8410-C1
IRIS_313-9039	4676414	29635224	0.1578	Sri Lanka	T	IOC	XI-2	MUTTU SAMBA::IRGC 36333-1
IRIS_313-9963	4670635	29635224	0.1576	Sri Lanka	inc	IOC	cA (Aus)	WIR 1391::IRGC 51605-1
IRIS_313-10035	4613423	29635224	0.1557	Madagascar	inc	IOC	XI-2	RIZ TYPE SORGHO::IRGC 69015-1
IRIS_313-9472	4576727	29635224	0.1544	Sri Lanka	inc	IOC	XI-adm	H 6::IRGC 157-1
IRIS_313-9917	4561490	29635224	0.1539	Sri Lanka	T	IOC	XI-1B	CHANDINA::IRGC 36420-1
IRIS_313-12118	4521048	29635224	0.1526	Madagascar	inc	IOC	XI-2	OVIBENAMPOTAKA + OVIBE + MAKALIOKA::IRGC 84756-1
IRIS_313-7725	4443148	29635224	0.1499	Madagascar	T	IOC	XI-2	MADINIKA 1329::GERVEX 8366-C1
IRIS_313-9978	4414521	29635224	0.149	Madagascar	I	IOC	cB (Bas)	IRAT 118::IRGC 55785-1
IRIS_313-7638	4392797	29635224	0.1482	Madagascar	inc	IOC	XI-adm	ANGIFOTSY 685::GERVEX 4717-C1
IRIS_313-7650	4390159	29635224	0.1481	Madagascar	inc	IOC	XI-2	BOTOHAVANA 139::GERVEX 8237-C1
IRIS_313-11741	4330591	29635224	0.1461	Sri Lanka	T	IOC	XI-2	HERATH BANDA::IRGC 67630-1
IRIS_313-10026	4317958	29635224	0.1457	Madagascar	inc	IOC	XI-2	KITRANA 1007::IRGC 68517-1
IRIS_313-8595	4282513	29635224	0.1445	Madagascar	inc	IOC	XI-2	MAKALIOKA STANDARD::IRGC 12768-1
IRIS_313-8925	4229674	29635224	0.1427	Sri Lanka	T	IOC	XI-2	KURULUTUDU::IRGC 36304-1
IRIS_313-11767	4184954	29635224	0.1412	Madagascar	inc	IOC	admix	VARY LAVA DE BOLOGNE::IRGC 69101-1
IRIS_313-11191	4177075	29635224	0.1409	Sri Lanka	T	IOC	cA (Aus)	RANRUWAN::IRGC 36360-1
B013	4174104	29635224	0.1408	Sri Lanka	inc	IOC	XI-adm	Sri Lanka 1
IRIS_313-10609	4172904	29635224	0.1408	Sri Lanka	T	IOC	XI-adm	MATHOLUWA::IRGC 8901-1
IRIS_313-10032	4080647	29635224	0.1377	Madagascar	inc	IOC	cB (Bas)	NS 1576::IRGC 68951-1
IRIS_313-11762	4069114	29635224	0.1373	Madagascar	inc	IOC	XI-2	NS 1515::IRGC 68947-1
IRIS_313-11772	4051310	29635224	0.1367	Madagascar	T	IOC	XI-2	ROJON'NY NTAOLO::IRGC 69410-1
IRIS_313-11789	4043476	29635224	0.1364	Madagascar	T	IOC	XI-2	SABORAMANDALOAFO::IRGC 69875-1
IRIS_313-12004	4018154	29635224	0.1356	Madagascar	inc	IOC	admix	TANALA::IRGC 79467-1
IRIS_313-11757	3991805	29635224	0.1347	Madagascar	inc	IOC	XI-3	BORIZINA 640::IRGC 68382-1
IRIS_313-11760	3970663	29635224	0.134	Madagascar	inc	IOC	XI-2	MENAHARA 505::IRGC 68709-1
IRIS_313-10051	3958940	29635224	0.1336	Madagascar	T	IOC	GJ-trp	TSIVIMBININA::IRGC 69890-1
IRIS_313-11794	3897137	29635224	0.1315	Madagascar	inc	IOC	XI-2	TSIPALA MENAHAR::IRGC 69979-1
IRIS_313-9949	3817515	29635224	0.1288	Sri Lanka	T	IOC	GJ-trp	PANNITHI::IRGC 51049-1
IRIS_313-10041	3786637	29635224	0.1278	Madagascar	T	IOC	GJ-trp	BOTOHAVANA MENA::IRGC 69349-1
IRIS_313-7722	3718141	29635224	0.1255	Madagascar	inc	IOC	admix	LATSIBOZAKA 112-1::GERVEX 8233-C1
IRIS_313-9745	3617203	29635224	0.1221	Madagascar	T	IOC	GJ-trp	VARY MALADY::IRGC 69911-1
IRIS_313-11791	3537934	29635224	0.1194	Madagascar	T	IOC	XI-2	VARY LAHY::IRGC 69908-1
IRIS_313-7646	3488819	29635224	0.1177	Madagascar	inc	IOC	admix	BETSILAIZINA::GERVEX 8405-C1
IRIS_313-10722	3420148	29635224	0.1154	Sri Lanka	T	IOC	GJ-trp	GODAWEL::IRGC 15750-1
IRIS_313-7993	3226497	29635224	0.1089	Madagascar	inc	IOC	GJ-trp	VARY LAVA DE BETAFO::GERVEX 8381-C1
IRIS_313-10025	3214869	29635224	0.1085	Madagascar	inc	IOC	admix	KALAPATLE::IRGC 68500-1
IRIS_313-10099	3157045	29635224	0.1065	Madagascar	T	IOC	GJ-trp	MANONGAZATO::IRGC 77876-1
IRIS_313-11792	3069036	29635224	0.1036	Madagascar	T	IOC	GJ-trp	VONBOANGY::IRGC 69947-1
IRIS_313-12279	2993693	29635224	0.101	Madagascar	inc	IOC	GJ-trp	RAMADITRA::IRGC 97124-1
IRIS_313-11754	2933901	29635224	0.099	Madagascar	inc	IOC	admix	AMBOHIMANDAY::IRGC 68330-1
IRIS_313-7959	2892056	29635224	0.09759	Madagascar	inc	IOC	GJ-trp	MITSANGANAHIJERY::GERVEX 8316-C1
IRIS_313-7992	2867773	29635224	0.09677	Madagascar	T	IOC	GJ-trp	VARY LAVA 90::GERVEX 8254-C1
IRIS_313-11790	2820842	29635224	0.09519	Madagascar	T	IOC	GJ-trp	VARIRANGAHY::IRGC 69897-1
IRIS_313-9742	2800380	29635224	0.09449	Madagascar	T	IOC	GJ-trp	LOHAMBITRO::IRGC 69857-1
IRIS_313-12281	2789294	29635224	0.09412	Madagascar	inc	IOC	GJ-trp	SALAZANA::IRGC 97219-1
IRIS_313-7994	2697669	29635224	0.09103	Madagascar	T	IOC	GJ-trp	VARY MADINIKA 3566::GERVEX 8448-C1
IRIS_313-11756	2490077	29635224	0.08402	Madagascar	inc	IOC	GJ-trp	BENGALI VAKAHANA 1448::IRGC 68370-1
IRIS_313-7850	2297039	29635224	0.07751	Madagascar	inc	IOC	GJ-trp	BODA 148-3::GERVEX 8258-C1
B051	5040856	29635224	0.1701	Egypt	inc	NAF	XI-adm	GZ 1368-5-4
IRIS_313-9926	5040394	29635224	0.1701	Chad	T	NAF	XI-adm	TOURBE::IRGC 47066-1
IRIS_313-8212	4896725	29635224	0.1652	Egypt	inc	NAF	XI-adm	GIZA 178::GERVEX 1681-C1
IRIS_313-12016	4729302	29635224	0.1596	Egypt	T	NAF	XI-adm	EX AUBERGE::IRGC 79898-3
CX111	2806126	29635224	0.09469	Egypt	P	NAF	GJ-trp	Giza 14
IRIS_313-8218	2418422	29635224	0.08161	Egypt	inc	NAF	GJ-tmp	SAKHA 103::GERVEX 1688-C1
CX58	2405033	29635224	0.08115	Egypt	I	NAF	GJ-tmp	Giza 159
B038	1818644	29635224	0.06137	Egypt	inc	NAF	GJ-tmp	Nabated A Smar
IRIS_313-8217	1773935	29635224	0.05986	Egypt	inc	NAF	GJ-tmp	SAKHA 102::GERVEX 1687-C1
IRIS_313-11168	8195858	29635224	0.2766	India	inc	SAC	cA (Aus)	KADA CHOPA::IRGC 34954-1
IRIS_313-11174	7866043	29635224	0.2654	India	inc	SAC	cA (Aus)	SLO 19::IRGC 35157-1
IRIS_313-9347	7279703	29635224	0.2456	India	inc	SAC	XI-adm	ARC 13778::IRGC 41216-1
IRIS_313-9516	7159491	29635224	0.2416	India	inc	SAC	XI-2	NCS 840::IRGC 62530-1
IRIS_313-8498	7147236	29635224	0.2412	India	inc	SAC	cB (Bas)	ARC 7091::IRGC 20491-1
IRIS_313-10150	7078996	29635224	0.2389	India	inc	SAC	cA (Aus)	N 22::IRGC 46459-1
IRIS_313-11595	7049607	29635224	0.2379	India	inc	SAC	cA (Aus)	AMAKOYALI::IRGC 60878-1
IRIS_313-10348	6961905	29635224	0.2349	India	inc	SAC	XI-adm	CSR-89 IR-15::IRGC 117326-1
IRIS_313-8401	6834365	29635224	0.2306	India	inc	SAC	XI-adm	ARC 13530::IRGC 41146-1
IRIS_313-8771	6764886	29635224	0.2283	India	inc	SAC	cA (Aus)	SIMUL KHURI::IRGC 35154-1
IRIS_313-11166	6759354	29635224	0.2281	India	inc	SAC	cA (Aus)	BHUT MURI::IRGC 34861-1
B030	6725561	29635224	0.2269	India	T	SAC	XI-adm	Jaibattey
IRIS_313-9641	6659617	29635224	0.2247	India	inc	SAC	cA (Aus)	BEGUM::IRGC 33990-1
IRIS_313-11255	6647683	29635224	0.2243	India	inc	SAC	XI-adm	ARC 7056::IRGC 40914-1
B187	6516635	29635224	0.2199	India	I	SAC	XI-adm	RP 1570-44-1
IRIS_313-11259	6500114	29635224	0.2193	India	inc	SAC	cB (Bas)	ARC 13515::IRGC 41134-2
IRIS_313-11420	6492177	29635224	0.2191	India	inc	SAC	XI-2	PISINI::IRGC 50035-2
CX368	6426193	29635224	0.2168	India	I	SAC	cA (Aus)	N 22
IRIS_313-8704	6418677	29635224	0.2166	India	T	SAC	XI-2	ROPA::IRGC 74774-1
IRIS_313-11169	6310404	29635224	0.2129	India	inc	SAC	cA (Aus)	KANAI BASHI::IRGC 34967-1
IRIS_313-8303	6288094	29635224	0.2122	India	T	SAC	XI-2	SURMATIYA::IRGC 74779-1
IRIS_313-8559	6257004	29635224	0.2111	India	inc	SAC	XI-2	KEERIPALA CHILL PADDY::IRGC 49790-1
IRIS_313-10523	6227753	29635224	0.2101	India	P	SAC	XI-adm	PTB 18::IRGC 6105-3
IRIS_313-11170	6204140	29635224	0.2094	India	inc	SAC	cA (Aus)	LAL TAURA::IRGC 35017-1
IRIS_313-10543	6200865	29635224	0.2092	India	T	SAC	cA (Aus)	DODGUI::IRGC 6666-1
IRIS_313-10417	6195887	29635224	0.2091	India	inc	SAC	XI-1B	UPR 1201-1-20-1::IRGC 117357-1
IRIS_313-8622	6180675	29635224	0.2086	India	inc	SAC	XI-2	XITTO::IRGC 6671-1
IRIS_313-11167	6172335	29635224	0.2083	India	inc	SAC	XI-2	DUBRAJ::IRGC 34904-1
IRIS_313-11261	6173643	29635224	0.2083	India	inc	SAC	XI-adm	ARC 13785::IRGC 41218-2
IRIS_313-11165	6100486	29635224	0.2059	India	inc	SAC	cA (Aus)	BENA JHUPI::IRGC 34850-2
IRIS_313-11292	6102042	29635224	0.2059	India	inc	SAC	XI-adm	ARC 10120::IRGC 42557-2
CX24	6062104	29635224	0.2046	India	P	SAC	XI-adm	TKM 9
IRIS_313-11421	6049800	29635224	0.2041	India	inc	SAC	XI-2	TULASIBAS::IRGC 50192-2
CX22	6038884	29635224	0.2038	India	I	SAC	XI-1B	PR 106
IRIS_313-11408	6040856	29635224	0.2038	India	inc	SAC	XI-2	CHITRAKALI::IRGC 49524-2
IRIS_313-11414	6038100	29635224	0.2037	India	inc	SAC	XI-adm	KARUNJEERAGA SAMBA::IRGC 49774-1
CX128	6024150	29635224	0.2033	Nepal	P	SAC	XI-adm	Gajale
IRIS_313-11164	6018414	29635224	0.2031	India	inc	SAC	cA (Aus)	BAK TULSI::IRGC 34831-1
IRIS_313-8614	6016820	29635224	0.203	India	inc	SAC	XI-2	RAJHUSAI (ACR 12)::IRGC 53630-1
IRIS_313-11368	6012812	29635224	0.2029	India	inc	SAC	XI-2	PANIKELASH::IRGC 46500-2
IRIS_313-10855	6006911	29635224	0.2027	India	inc	SAC	XI-2	ARC 10159::IRGC 20754-2
IRIS_313-8844	5993110	29635224	0.2022	India	inc	SAC	XI-2	ARC 14060::IRGC 41374-1
IRIS_313-8731	5972687	29635224	0.2015	India	T	SAC	XI-2	NIBARI::IRGC 67742-1
IRIS_313-11409	5962531	29635224	0.2012	India	inc	SAC	XI-2	CUTTACK 29::IRGC 49573-1
IRIS_313-11152	5951020	29635224	0.2008	India	inc	SAC	XI-1A	AC 74::IRGC 33967-1
IRIS_313-8754	5937404	29635224	0.2003	India	T	SAC	XI-2	TYPE 50::IRGC 74782-1
IRIS_313-11282	5934893	29635224	0.2003	India	inc	SAC	XI-2	ARC 15589::IRGC 42096-2
B195	5933792	29635224	0.2002	India	inc	SAC	XI-adm	PMS 10B
IRIS_313-10877	5927479	29635224	0.2	India	inc	SAC	cA (Aus)	ARC 12079::IRGC 21888-1
IRIS_313-11172	5920795	29635224	0.1998	India	inc	SAC	cA (Aus)	RANI BHOG::IRGC 35109-1
IRIS_313-11296	5915896	29635224	0.1996	India	inc	SAC	XI-adm	ARC 12800::IRGC 42720-2
IRIS_313-8796	5913392	29635224	0.1995	India	T	SAC	XI-2	DUDH KADAR::IRGC 67707-1
IRIS_313-10849	5879779	29635224	0.1984	India	inc	SAC	cA (Aus)	ARC 7001::IRGC 20436-1
IRIS_313-11294	5879515	29635224	0.1984	India	inc	SAC	XI-2	ARC 11245::IRGC 42651-2
IRIS_313-11827	5878683	29635224	0.1984	India	T	SAC	XI-2	KARI GURMATIA::IRGC 70850-1
IRIS_313-8657	5862736	29635224	0.1978	India	P	SAC	XI-adm	CO 19::IRGC 5905-1
IRIS_313-10885	5859050	29635224	0.1977	India	inc	SAC	XI-adm	ARC 12559::IRGC 22148-2
IRIS_313-8631	5842936	29635224	0.1972	India	inc	SAC	XI-2	DUDRE::IRGC 52523-1
IRIS_313-11175	5839807	29635224	0.1971	India	inc	SAC	cA (Aus)	SONA AUS::IRGC 35160-1
IRIS_313-11403	5833633	29635224	0.1968	India	inc	SAC	XI-adm	AEB 368 RIP P TYPE ADT::IRGC 49359-2
IRIS_313-11299	5821917	29635224	0.1965	India	inc	SAC	XI-adm	ARC 14299::IRGC 42889-2
CX96	5807276	29635224	0.196	India	P	SAC	XI-1B	Ajaya
IRIS_313-11419	5807129	29635224	0.196	India	inc	SAC	XI-adm	MUTHA SAMBA::IRGC 49924-2
IRIS_313-10878	5798179	29635224	0.1957	India	inc	SAC	cA (Aus)	ARC 12101::IRGC 21907-1
IRIS_313-11173	5799521	29635224	0.1957	India	inc	SAC	cA (Aus)	SADA AUS::IRGC 35117-1
IRIS_313-11606	5796024	29635224	0.1956	India	inc	SAC	XI-2	BOKDEL::IRGC 61085-1
IRIS_313-11353	5778677	29635224	0.195	India	inc	SAC	cA (Aus)	CHILE BORO::IRGC 45297-2
CX93	5750043	29635224	0.194	India	I	SAC	XI-adm	TGMS 29
IRIS_313-10882	5744057	29635224	0.1938	India	inc	SAC	cA (Aus)	ARC 12433::IRGC 22064-1
IRIS_313-11171	5738607	29635224	0.1936	India	P	SAC	cA (Aus)	M 142::IRGC 35054-1
IRIS_313-10527	5727493	29635224	0.1933	India	P	SAC	XI-2	ADT 12::IRGC 6254-1
IRIS_313-8647	5723828	29635224	0.1931	India	inc	SAC	XI-2	PERUNEL::IRGC 63113-1
IRIS_313-10833	5716360	29635224	0.1929	India	I	SAC	XI-2	EDAKKADAN 0-69-27::IRGC 19560-1
IRIS_313-8900	5696871	29635224	0.1922	India	inc	SAC	XI-2	ARC 14654::IRGC 41663-1
IRIS_313-10896	5689704	29635224	0.192	India	inc	SAC	admix	ARC 13276::IRGC 22622-2
CX61	5684134	29635224	0.1918	India	I	SAC	XI-1A	Bhavani
IRIS_313-11291	5683195	29635224	0.1918	India	inc	SAC	cA (Aus)	ARC 7425::IRGC 42538-1
IRIS_313-11197	5681429	29635224	0.1917	India	P	SAC	XI-adm	K 17-9-1-1::IRGC 36778-1
IRIS_313-8265	5678609	29635224	0.1916	India	inc	SAC	XI-adm	CO 39::IRGC 51231-1
IRIS_313-11480	5674624	29635224	0.1915	India	I	SAC	XI-1B	PR 106::IRGC 53418-1
IRIS_313-10854	5643728	29635224	0.1904	India	inc	SAC	cA (Aus)	ARC 10145::IRGC 20744-1
IRIS_313-10887	5636425	29635224	0.1902	India	inc	SAC	XI-adm	ARC 12690::IRGC 22257-1
IRIS_313-10879	5632558	29635224	0.1901	India	inc	SAC	admix	ARC 12124::IRGC 21929-1
IRIS_313-9351	5616977	29635224	0.1895	India	inc	SAC	XI-2	PARA NELLU::IRGC 50009-1
IRIS_313-10608	5613265	29635224	0.1894	India	inc	SAC	cA (Aus)	T 21::IRGC 8892-1
IRIS_313-11288	5612954	29635224	0.1894	India	inc	SAC	XI-adm	ARC 18434::IRGC 42429-2
CX146	5605944	29635224	0.1892	India	P	SAC	XI-adm	CO 43
IRIS_313-11284	5606607	29635224	0.1892	India	inc	SAC	XI-adm	ARC 18001::IRGC 42195-2
IRIS_313-8458	5603674	29635224	0.1891	India	inc	SAC	XI-adm	ARC 18175::IRGC 42316-1
IRIS_313-10640	5587178	29635224	0.1885	India	P	SAC	XI-2	SR 26 B::IRGC 10803-2
CX228	5582607	29635224	0.1884	India	I	SAC	XI-adm	Bala
IRIS_313-9360	5582798	29635224	0.1884	India	inc	SAC	XI-2	BHASAMANIK::IRGC 46954-1
IRIS_313-10989	5582870	29635224	0.1884	India	P	SAC	XI-2	GUTTI AKKULLU::IRGC 26850-2
IRIS_313-11200	5579943	29635224	0.1883	India	I	SAC	XI-1B	BR 52-87-1::IRGC 36849-2
IRIS_313-11407	5576641	29635224	0.1882	India	inc	SAC	XI-2	BATCHA BHOG (SCENTED)::IRGC 49440-2
IRIS_313-10148	5575125	29635224	0.1881	India	P	SAC	XI-adm	CAUVERY::IRGC 45255-1
IRIS_313-10673	5573918	29635224	0.1881	India	T	SAC	cA (Aus)	ARC 10843::IRGC 12653-1
IRIS_313-10869	5567938	29635224	0.1879	India	inc	SAC	cA (Aus)	ARC 11751::IRGC 21614-1
IRIS_313-9259	5566340	29635224	0.1878	India	inc	SAC	XI-2	G 25::IRGC 45733-1
CX267	5562857	29635224	0.1877	India	P	SAC	XI-adm	IET 1444
IRIS_313-11243	5561993	29635224	0.1877	India	I	SAC	admix	RATNAGIRI 45-2::IRGC 39709-1
IRIS_313-10731	5559219	29635224	0.1876	Nepal	inc	SAC	XI-1A	BARKHE TAULI::IRGC 16116-1
IRIS_313-11041	5549334	29635224	0.1873	India	inc	SAC	XI-2	POONGAR::IRGC 28611-1
CX236	5548116	29635224	0.1872	India	I	SAC	XI-adm	Vandana
IRIS_313-11354	5518826	29635224	0.1862	India	inc	SAC	XI-2	CAC 75::IRGC 45352-2
CX45	5513941	29635224	0.1861	India	P	SAC	XI-1B	Dhan 4
IRIS_313-11348	5504686	29635224	0.1857	India	inc	SAC	cA (Aus)	AUS PADDY (RED)::IRGC 44978-1
IRIS_313-9610	5500724	29635224	0.1856	India	T	SAC	cA (Aus)	DANGAR::IRGC 76296-1
IRIS_313-10925	5494112	29635224	0.1854	Nepal	T	SAC	cA (Aus)	KAMULI::IRGC 23928-1
IRIS_313-11445	5494356	29635224	0.1854	India	T	SAC	XI-2	NCS 102::IRGC 51854-1
IRIS_313-9400	5490381	29635224	0.1853	India	inc	SAC	XI-adm	NCS 964 C::IRGC 62604-1
IRIS_313-12182	5492187	29635224	0.1853	Nepal	T	SAC	XI-adm	NYAULI::IRGC 88628-1
IRIS_313-9424	5488984	29635224	0.1852	India	inc	SAC	XI-adm	ARC 5840::IRGC 12144-1
IRIS_313-11304	5482887	29635224	0.185	India	inc	SAC	XI-adm	ARC 15163::IRGC 43106-1
IRIS_313-10349	5470914	29635224	0.1846	India	inc	SAC	XI-adm	CSR-90 IR-2::IRGC 117327-1
IRIS_313-11371	5464852	29635224	0.1844	India	P	SAC	cA (Aus)	SATHI::IRGC 46659-1
B029	5460792	29635224	0.1843	India	T	SAC	XI-1B	Dumai
IRIS_313-7780	5449938	29635224	0.1839	India	P	SAC	XI-adm	SONA::IRGC 26971-C1
IRIS_313-10929	5448950	29635224	0.1839	India	inc	SAC	XI-2	KOLONGI BAO::IRGC 24135-2
IRIS_313-10836	5446508	29635224	0.1838	India	I	SAC	XI-2	VELLA PERUVAZHA 0-68-12::IRGC 19588-1
IRIS_313-10897	5447699	29635224	0.1838	India	inc	SAC	XI-3	ARC 13373::IRGC 22691-1
IRIS_313-10542	5444555	29635224	0.1837	India	inc	SAC	XI-2	BELLO::IRGC 6658-2
CX94	5440572	29635224	0.1836	India	I	SAC	XI-adm	Swarna
IRIS_313-8382	5440955	29635224	0.1836	India	inc	SAC	admix	ARC 13252::IRGC 22604-1
IRIS_313-8450	5439937	29635224	0.1836	India	P	SAC	XI-2	498-2A BR 8::IRGC 5891-1
IRIS_313-9083	5431711	29635224	0.1833	India	P	SAC	cB (Bas)	PANKHARI 203::IRGC 5999-1
IRIS_313-10875	5426902	29635224	0.1831	India	inc	SAC	cA (Aus)	ARC 12021::IRGC 21837-1
IRIS_313-11455	5418608	29635224	0.1828	India	inc	SAC	cA (Aus)	CIPPI::IRGC 52415-1
IRIS_313-8757	5415121	29635224	0.1827	India	inc	SAC	XI-2	NIRGUNI::IRGC 61127-1
IRIS_313-10873	5404294	29635224	0.1824	India	inc	SAC	cA (Aus)	ARC 11822::IRGC 21677-1
IRIS_313-11176	5406699	29635224	0.1824	India	inc	SAC	XI-adm	SXC 216::IRGC 35175-1
IRIS_313-11306	5405014	29635224	0.1824	India	inc	SAC	XI-adm	ARC 15385::IRGC 43174-1
IRIS_313-9137	5402962	29635224	0.1823	India	inc	SAC	cA (Aus)	ARC 10100::IRGC 20709-1
IRIS_313-11199	5403757	29635224	0.1823	India	inc	SAC	XI-adm	SYNTHETIC SATIVA::IRGC 36842-2
IRIS_313-11361	5394440	29635224	0.182	India	inc	SAC	XI-2	KALIKALMA::IRGC 45996-2
IRIS_313-11600	5393957	29635224	0.182	India	inc	SAC	XI-2	KOTODESHI::IRGC 60982-1
IRIS_313-10880	5389378	29635224	0.1819	India	inc	SAC	XI-2	ARC 12180::IRGC 21965-2
IRIS_313-8306	5388905	29635224	0.1818	India	T	SAC	XI-adm	PULUTHI KARAN (MIXED)::IRGC 77530-1
IRIS_313-11359	5369444	29635224	0.1812	India	inc	SAC	XI-2	DAHARNAGRA::IRGC 45465-2
IRIS_313-10856	5367691	29635224	0.1811	India	inc	SAC	admix	ARC 10537::IRGC 20981-1
IRIS_313-11505	5366564	29635224	0.1811	India	T	SAC	XI-2	K 1074::IRGC 55017-1
IRIS_313-8435	5357150	29635224	0.1808	India	T	SAC	XI-1A	UPRH 233::IRGC 61667-1
IRIS_313-8603	5351707	29635224	0.1806	India	inc	SAC	XI-adm	ARC 12884::IRGC 22417-1
IRIS_313-11283	5342230	29635224	0.1803	India	inc	SAC	XI-adm	ARC 15743::IRGC 42127-2
IRIS_313-11272	5338575	29635224	0.1801	India	inc	SAC	cA (Aus)	ARC 14756::IRGC 41736-1
IRIS_313-8414	5335259	29635224	0.18	India	inc	SAC	XI-adm	ARC 18202::IRGC 42328-1
IRIS_313-11365	5334926	29635224	0.18	India	inc	SAC	XI-adm	LANJALI::IRGC 46236-2
IRIS_313-9197	5320871	29635224	0.1795	India	inc	SAC	XI-3	GABAHSI RASAKI C 90::IRGC 49647-1
IRIS_313-10924	5320856	29635224	0.1795	Nepal	T	SAC	XI-adm	ATH HAGARI JARAHAN PADDY::IRGC 23796-1
IRIS_313-8957	5309839	29635224	0.1792	India	P	SAC	XI-2	BAM 9::IRGC 6179-1
IRIS_313-11566	5311470	29635224	0.1792	Nepal	T	SAC	XI-2	MOONOR::IRGC 59136-1
IRIS_313-11363	5295861	29635224	0.1787	India	inc	SAC	XI-2	KHEJURTHUPI::IRGC 46137-2
IRIS_313-11563	5296000	29635224	0.1787	Nepal	T	SAC	XI-2	BIJULI BATI::IRGC 58917-1
IRIS_313-11287	5284863	29635224	0.1783	India	inc	SAC	XI-adm	ARC 18371::IRGC 42423-2
IRIS_313-11417	5285182	29635224	0.1783	India	inc	SAC	admix	LAWANGAI::IRGC 49850-2
IRIS_313-11307	5281039	29635224	0.1782	India	inc	SAC	XI-adm	ARC 15387::IRGC 43175-2
IRIS_313-11232	5279236	29635224	0.1781	India	inc	SAC	cA (Aus)	R 146::IRGC 38606-1
CX91	5262494	29635224	0.1776	India	P	SAC	XI-1B	Govind
IRIS_313-11568	5260204	29635224	0.1775	Nepal	T	SAC	XI-1A	SATHIYA::IRGC 59225-1
IRIS_313-11828	5256381	29635224	0.1774	India	T	SAC	XI-2	LALI GURMATIA::IRGC 70854-1
IRIS_313-8554	5251608	29635224	0.1772	India	inc	SAC	cA (Aus)	ARC 11959::IRGC 21780-1
IRIS_313-7736	5249288	29635224	0.1771	India	inc	SAC	XI-2	NONA BOKRA::IRGC 22710-C1
IRIS_313-11621	5249230	29635224	0.1771	India	T	SAC	XI-adm	UPRH 265::IRGC 61689-1
IRIS_313-8727	5244757	29635224	0.177	India	T	SAC	XI-2	T 315::IRGC 54792-1
IRIS_313-11442	5245148	29635224	0.177	India	T	SAC	XI-adm	ARC 18502::IRGC 51749-2
IRIS_313-11271	5241519	29635224	0.1769	India	inc	SAC	XI-2	ARC 14737::IRGC 41729-2
IRIS_313-11597	5239695	29635224	0.1768	India	inc	SAC	XI-2	BHATA PYAGI::IRGC 60895-1
CX63	5237863	29635224	0.1767	India	P	SAC	cA (Aus)	Jhona 349
IRIS_313-11599	5234344	29635224	0.1766	India	inc	SAC	XI-2	JUGRAY::IRGC 60960-1
IRIS_313-9619	5230421	29635224	0.1765	India	inc	SAC	XI-adm	ARC 15845::IRGC 42151-1
IRIS_313-11349	5230858	29635224	0.1765	India	inc	SAC	XI-2	BACHHAIKALMA::IRGC 45003-2
IRIS_313-11491	5228357	29635224	0.1764	India	inc	SAC	XI-2	BIR BAHADUR::IRGC 53889-1
IRIS_313-11358	5223914	29635224	0.1763	India	inc	SAC	XI-2	DADKHANI::IRGC 45454-2
IRIS_313-11506	5224156	29635224	0.1763	India	T	SAC	XI-adm	K 15591-4::IRGC 55043-1
IRIS_313-9484	5222138	29635224	0.1762	India	T	SAC	XI-adm	CHNNOR::IRGC 67485-1
IRIS_313-11308	5222233	29635224	0.1762	India	inc	SAC	XI-2	ARC 15403::IRGC 43183-2
IRIS_313-11357	5221623	29635224	0.1762	India	P	SAC	XI-1B	CR 579-1-3::IRGC 45443-2
IRIS_313-11418	5221405	29635224	0.1762	India	inc	SAC	XI-2	MATALI::IRGC 49891-2
IRIS_313-9522	5214149	29635224	0.1759	India	inc	SAC	XI-adm	RPW 9-4 (SS 1)::IRGC 50690-1
IRIS_313-9611	5212286	29635224	0.1759	India	T	SAC	XI-2	WANGA BARUGULU::IRGC 52261-1
IRIS_313-11561	5210247	29635224	0.1758	Nepal	T	SAC	XI-2	BANGLA::IRGC 58876-1
IRIS_313-11367	5208358	29635224	0.1757	India	inc	SAC	XI-2	MAKARANDASAIL::IRGC 46289-2
IRIS_313-11603	5207388	29635224	0.1757	India	inc	SAC	cA (Aus)	PANDRI PAREWA::IRGC 61030-1
IRIS_313-8315	5205423	29635224	0.1756	India	inc	SAC	XI-adm	ARC 11867::IRGC 40978-1
IRIS_313-8268	5197261	29635224	0.1754	Nepal	T	SAC	cB (Bas)	CHHOTE DHAN::IRGC 58930-1
IRIS_313-10667	5195478	29635224	0.1753	India	inc	SAC	XI-2	ARC 7236::IRGC 12335-1
IRIS_313-11565	5185215	29635224	0.175	Nepal	T	SAC	XI-2	KUSUM KATIKI::IRGC 59099-1
IRIS_313-9433	5178783	29635224	0.1748	India	inc	SAC	XI-2	GOKULGANJA::IRGC 45701-1
IRIS_313-10734	5178744	29635224	0.1747	Nepal	P	SAC	cA (Aus)	DEVARASI::IRGC 16173-1
IRIS_313-11937	5178666	29635224	0.1747	India	inc	SAC	XI-adm	KUNJUKUNJU::IRGC 75448-1
IRIS_313-9287	5174979	29635224	0.1746	India	inc	SAC	XI-2	SONAMUKHI::IRGC 46693-1
IRIS_313-11492	5173998	29635224	0.1746	India	inc	SAC	cA (Aus)	SIRHANTI::IRGC 53930-1
IRIS_313-9258	5168698	29635224	0.1744	India	T	SAC	XI-2	MAKRO::IRGC 74763-1
IRIS_313-11305	5167548	29635224	0.1744	India	inc	SAC	XI-adm	ARC 15373::IRGC 43166-2
CX100	5162791	29635224	0.1742	Nepal	P	SAC	XI-1B	Palung 2
IRIS_313-10676	5162047	29635224	0.1742	India	T	SAC	admix	ARC 10916::IRGC 12673-1
IRIS_313-11452	5162329	29635224	0.1742	India	T	SAC	cA (Aus)	LOCAL BHAT::IRGC 52343-1
IRIS_313-8946	5152107	29635224	0.1739	India	inc	SAC	XI-adm	ARC 11524::IRGC 42672-1
IRIS_313-11458	5154456	29635224	0.1739	India	T	SAC	cA (Aus)	KARAHANI::IRGC 52664-1
IRIS_313-10668	5146869	29635224	0.1737	India	inc	SAC	XI-adm	ARC 7255::IRGC 12343-2
IRIS_313-11432	5146002	29635224	0.1736	India	inc	SAC	admix	ISWAR KORA::IRGC 50674-1
IRIS_313-9557	5142621	29635224	0.1735	India	T	SAC	XI-2	MULLIKURUVA::IRGC 77529-1
IRIS_313-11300	5139403	29635224	0.1734	India	inc	SAC	XI-2	ARC 14709::IRGC 42976-2
IRIS_313-12180	5121423	29635224	0.1728	Nepal	T	SAC	XI-adm	JHINUWA DHAN::IRGC 88545-1
IRIS_313-11969	5118218	29635224	0.1727	India	inc	SAC	XI-2	SHYAMJIRA::IRGC 77522-3
IRIS_313-10674	5114150	29635224	0.1726	India	inc	SAC	XI-adm	ARC 10846::IRGC 12656-2
IRIS_313-10927	5113721	29635224	0.1726	Nepal	T	SAC	cA (Aus)	SUGA PANKHA::IRGC 24054-1
IRIS_313-10404	5113311	29635224	0.1725	India	inc	SAC	XI-adm	K 479-2-3::IRGC 117346-1
IRIS_313-10876	5104779	29635224	0.1723	India	inc	SAC	cA (Aus)	ARC 12067::IRGC 21881-1
IRIS_313-11446	5104778	29635224	0.1723	India	T	SAC	XI-2	NAPDAI::IRGC 52009-1
IRIS_313-11449	5099729	29635224	0.1721	India	T	SAC	XI-adm	KODIA PHUL::IRGC 52168-1
IRIS_313-11628	5088901	29635224	0.1717	Nepal	T	SAC	admix	KARISHNABELI::IRGC 61979-1
IRIS_313-11448	5085740	29635224	0.1716	India	T	SAC	XI-2	BARAMANJ::IRGC 52067-1
IRIS_313-11639	5074476	29635224	0.1712	India	inc	SAC	XI-adm	NCS 349::IRGC 62257-1
IRIS_313-11374	5070108	29635224	0.1711	India	inc	SAC	cA (Aus)	W 398::IRGC 46787-1
IRIS_313-8621	5067670	29635224	0.171	India	inc	SAC	XI-1B	ARC 11663::IRGC 42695-1
CX92	5056687	29635224	0.1706	India	P	SAC	XI-1B	UPR 191-66
IRIS_313-11252	5054341	29635224	0.1706	India	inc	SAC	XI-adm	ADR 52::IRGC 40638-2
IRIS_313-11650	5056372	29635224	0.1706	India	inc	SAC	XI-2	NCS 901 A::IRGC 62568-1
IRIS_313-11433	5051393	29635224	0.1705	India	I	SAC	XI-1A	MR 136-1::IRGC 50707-1
IRIS_313-9593	5050709	29635224	0.1704	India	inc	SAC	XI-adm	ARC 15088::IRGC 41934-1
B032	5047506	29635224	0.1703	India	P	SAC	XI-1B	Rohini
IRIS_313-11369	5042990	29635224	0.1702	India	inc	SAC	XI-2	RANACHANDRABHOG::IRGC 46567-2
IRIS_313-10519	5037744	29635224	0.17	India	P	SAC	XI-2	ADT 22::IRGC 5901-3
IRIS_313-11456	5033182	29635224	0.1698	India	inc	SAC	cA (Aus)	KOLAMBA::IRGC 52456-1
IRIS_313-8994	5029596	29635224	0.1697	India	inc	SAC	XI-adm	ARC 14064::IRGC 41377-1
IRIS_313-10007	5030116	29635224	0.1697	Nepal	T	SAC	XI-adm	GARURA::IRGC 64111-1
IRIS_313-11364	5029597	29635224	0.1697	India	inc	SAC	XI-adm	KHIRPULI::IRGC 46143-3
IRIS_313-9348	5017019	29635224	0.1693	India	inc	SAC	XI-2	BK 26::IRGC 45197-1
IRIS_313-11286	5018272	29635224	0.1693	India	inc	SAC	XI-adm	ARC 18325::IRGC 42399-3
IRIS_313-11462	5017786	29635224	0.1693	India	T	SAC	cA (Aus)	SALSI::IRGC 52833-1
IRIS_313-11355	5010477	29635224	0.1691	India	inc	SAC	XI-adm	CN 44-40-7::IRGC 45368-1
IRIS_313-11276	5006390	29635224	0.1689	India	inc	SAC	XI-adm	ARC 15063::IRGC 41909-2
IRIS_313-12093	5005164	29635224	0.1689	Nepal	inc	SAC	XI-adm	KARUEL::IRGC 83792-1
CX157	5001369	29635224	0.1688	India	I	SAC	XI-adm	PTB 33
IRIS_313-9634	4998892	29635224	0.1687	India	inc	SAC	XI-adm	ARC 15873::IRGC 43250-1
IRIS_313-11596	5000817	29635224	0.1687	India	inc	SAC	XI-adm	BHAINSA MUNDARIYA::IRGC 60893-1
IRIS_313-11275	4993213	29635224	0.1685	India	inc	SAC	XI-adm	ARC 14975::IRGC 41848-1
IRIS_313-11636	4992357	29635224	0.1685	India	inc	SAC	cA (Aus)	NCS 271 A::IRGC 62216-1
IRIS_313-15909	4993271	29635224	0.1685	India	inc	SAC	cB (Bas)	IET 14720::IRTP 23179-G1
IRIS_313-10835	4988323	29635224	0.1683	India	I	SAC	XI-2	PERUNEL 0-69-18::IRGC 19581-1
IRIS_313-10735	4982289	29635224	0.1681	Nepal	P	SAC	cA (Aus)	LAL SAR::IRGC 16185-1
IRIS_313-11454	4982639	29635224	0.1681	India	T	SAC	cA (Aus)	BARI SUTAR::IRGC 52410-1
IRIS_313-10845	4976847	29635224	0.1679	India	inc	SAC	cA (Aus)	ARC 5756::IRGC 20220-2
IRIS_313-11616	4973037	29635224	0.1678	India	T	SAC	admix	UPRH 31::IRGC 61503-1
IRIS_313-11641	4968628	29635224	0.1677	India	inc	SAC	XI-2	NCS 477::IRGC 62299-1
IRIS_313-11478	4968162	29635224	0.1676	India	inc	SAC	XI-2	LOCAL::IRGC 53300-1
IRIS_313-8920	4964219	29635224	0.1675	India	inc	SAC	XI-2	PATALASAFED SUNGHAWADO::IRGC 61133-1
IRIS_313-10756	4962939	29635224	0.1675	India	I	SAC	XI-2	DAMODAR::IRGC 17038-1
IRIS_313-9560	4960540	29635224	0.1674	India	inc	SAC	XI-adm	ARC 11857::IRGC 40972-1
IRIS_313-10544	4953954	29635224	0.1672	India	inc	SAC	XI-2	DONGREM::IRGC 6688-1
IRIS_313-11370	4954752	29635224	0.1672	India	inc	SAC	XI-2	SACHI::IRGC 46612-2
CX130	4952705	29635224	0.1671	India	P	SAC	XI-2	CHIPDA
IRIS_313-11293	4951422	29635224	0.1671	India	inc	SAC	cB (Bas)	ARC 10975::IRGC 42611-2
B031	4948662	29635224	0.167	India	inc	SAC	XI-2	Ngatsin
CX90	4949955	29635224	0.167	Nepal	P	SAC	XI-1B	Chhomromg
IRIS_313-10623	4949949	29635224	0.167	Nepal	inc	SAC	cA (Aus)	SIDALI::IRGC 9567-1
IRIS_313-10891	4944894	29635224	0.1669	India	inc	SAC	cA (Aus)	ARC 12867::IRGC 22401-1
IRIS_313-11360	4944868	29635224	0.1669	India	inc	SAC	cB (Bas)	JALADHI 1::IRGC 45858-2
IRIS_313-11309	4942748	29635224	0.1668	India	inc	SAC	XI-adm	ARC 15862::IRGC 43242-1
IRIS_313-12013	4942787	29635224	0.1668	India	inc	SAC	XI-2	RAUSRR 4::IRGC 79785-1
IRIS_313-11944	4941621	29635224	0.1667	Nepal	inc	SAC	XI-1A	I 814::IRGC 76028-1
IRIS_313-10733	4922328	29635224	0.1661	Nepal	inc	SAC	XI-adm	MOTANGE PAHELLO LAULE::IRGC 16160-1
IRIS_313-11640	4921989	29635224	0.1661	India	inc	SAC	XI-2	NCS 458::IRGC 62290-1
CX273	4919285	29635224	0.166	India	P	SAC	XI-adm	NONA BOKRA
IRIS_313-10737	4920921	29635224	0.166	Nepal	P	SAC	cA (Aus)	GHAIYA::IRGC 16286-1
IRIS_313-9053	4912524	29635224	0.1658	India	inc	SAC	admix	ARC 12536::IRGC 41068-1
IRIS_313-11447	4909321	29635224	0.1657	India	T	SAC	XI-adm	TUNAGANNAPNANG::IRGC 52046-1
CX218	4905871	29635224	0.1655	India	P	SAC	XI-1B	Type 3
IRIS_313-8982	4905944	29635224	0.1655	India	inc	SAC	XI-adm	ARC 18112::IRGC 42274-1
IRIS_313-11274	4900809	29635224	0.1654	India	inc	SAC	cA (Aus)	ARC 14901::IRGC 41811-1
IRIS_313-11310	4899042	29635224	0.1653	India	inc	SAC	XI-2	ARC 15929::IRGC 43269-2
IRIS_313-11351	4895087	29635224	0.1652	India	inc	SAC	XI-2	BANCHI::IRGC 45055-2
IRIS_313-9313	4875038	29635224	0.1645	India	T	SAC	XI-adm	ARC 10799::IRGC 12631-1
IRIS_313-12139	4874389	29635224	0.1645	Nepal	inc	SAC	cA (Aus)	MANSARA DHAN::IRGC 86940-1
IRIS_313-10671	4872284	29635224	0.1644	India	inc	SAC	XI-adm	ARC 10581::IRGC 12514-1
IRIS_313-11490	4873414	29635224	0.1644	India	T	SAC	XI-adm	ARC 15480::IRGC 53799-1
IRIS_313-9604	4868690	29635224	0.1643	India	inc	SAC	XI-adm	RPA 5929 (K 45)::IRGC 33963-1
IRIS_313-8924	4865035	29635224	0.1642	India	T	SAC	XI-2	KUTTA::IRGC 52184-1
IRIS_313-10534	4861881	29635224	0.1641	India	P	SAC	cA (Aus)	D 204-1::IRGC 6445-1
IRIS_313-11619	4862840	29635224	0.1641	India	T	SAC	cA (Aus)	UPRH 166::IRGC 61615-1
IRIS_313-9609	4858163	29635224	0.1639	India	inc	SAC	XI-adm	ARC 10594::IRGC 12524-1
IRIS_313-11963	4850842	29635224	0.1637	India	I	SAC	cA (Aus)	KARANGI::IRGC 77128-1
IRIS_313-8585	4848369	29635224	0.1636	India	inc	SAC	XI-adm	ARC 11901::IRGC 21727-1
IRIS_313-11638	4847857	29635224	0.1636	India	inc	SAC	XI-2	NCS 331::IRGC 62247-1
IRIS_313-11629	4836982	29635224	0.1632	Nepal	T	SAC	cA (Aus)	LATIJHABAR::IRGC 61991-1
IRIS_313-10754	4829340	29635224	0.163	India	inc	SAC	XI-adm	KH 998::IRGC 16948-2
IRIS_313-10675	4828868	29635224	0.1629	India	T	SAC	XI-adm	ARC 10905::IRGC 12669-1
IRIS_313-11602	4828716	29635224	0.1629	India	inc	SAC	cA (Aus)	MALCHI::IRGC 61004-1
IRIS_313-10926	4825498	29635224	0.1628	Nepal	T	SAC	cB (Bas)	RAM SALEE KATAKA::IRGC 24014-1
IRIS_313-10868	4822123	29635224	0.1627	India	inc	SAC	cB (Bas)	ARC 11571::IRGC 21487-2
B011	4816949	29635224	0.1625	India	P	SAC	XI-adm	CO 22
IRIS_313-9566	4816045	29635224	0.1625	India	I	SAC	XI-1B	RP 9-4::IRGC 39735-1
IRIS_313-9427	4812646	29635224	0.1624	India	inc	SAC	XI-adm	ARC 18092::IRGC 42256-1
IRIS_313-11413	4813665	29635224	0.1624	India	inc	SAC	cA (Aus)	KALAR KAR::IRGC 49737-2
IRIS_313-11301	4800810	29635224	0.162	India	inc	SAC	XI-2	ARC 14868::IRGC 43009-2
IRIS_313-11917	4796586	29635224	0.1619	India	P	SAC	cA (Aus)	BUTNAPAR::IRGC 74734-1
IRIS_313-10736	4796427	29635224	0.1618	Nepal	inc	SAC	cA (Aus)	RERM BILASH::IRGC 16273-2
IRIS_313-8568	4770155	29635224	0.161	India	T	SAC	XI-2	LARHA MUGAD::IRGC 52339-1
IRIS_313-11477	4761137	29635224	0.1607	India	inc	SAC	cA (Aus)	KANPURI::IRGC 53278-1
IRIS_313-11598	4762865	29635224	0.1607	India	inc	SAC	admix	GODADANI::IRGC 60944-1
IRIS_313-11607	4755593	29635224	0.1605	India	inc	SAC	XI-2	HOLDIGANTHI::IRGC 61105-1
IRIS_313-11618	4749682	29635224	0.1603	India	T	SAC	cA (Aus)	UPRH 58::IRGC 61525-1
IRIS_313-9492	4748743	29635224	0.1602	India	inc	SAC	XI-2	NCS 237::IRGC 62202-1
IRIS_313-9547	4743467	29635224	0.1601	India	T	SAC	XI-2	LABRA::IRGC 74757-1
IRIS_313-10664	4744394	29635224	0.1601	India	inc	SAC	XI-2	ARC 6052::IRGC 12196-1
IRIS_313-11624	4734969	29635224	0.1598	Nepal	T	SAC	XI-1A	ANADI WHITE::IRGC 61897-1
IRIS_313-11042	4731812	29635224	0.1597	India	inc	SAC	XI-adm	VELLAIKOTTAI::IRGC 28618-1
IRIS_313-8332	4725320	29635224	0.1594	India	inc	SAC	XI-adm	ARC 15091::IRGC 43048-1
IRIS_313-11712	4715986	29635224	0.1591	India	inc	SAC	cA (Aus)	GORA DHAN 2::IRGC 66269-1
IRIS_313-11443	4710323	29635224	0.1589	India	T	SAC	XI-adm	ARC 18533::IRGC 51756-1
IRIS_313-11461	4709534	29635224	0.1589	India	T	SAC	XI-2	VAIKATHARYAN::IRGC 52805-1
IRIS_313-11620	4707233	29635224	0.1588	India	T	SAC	cA (Aus)	UPRH 197::IRGC 61641-1
IRIS_313-11040	4703913	29635224	0.1587	India	inc	SAC	XI-adm	KAVIVARI SAMBA::IRGC 28597-2
CX60	4689439	29635224	0.1582	India	T	SAC	XI-1B	Basmati
IRIS_313-11240	4684058	29635224	0.1581	India	I	SAC	XI-adm	CR 157-392-4::IRGC 39247-2
IRIS_313-11281	4683223	29635224	0.158	India	inc	SAC	XI-1A	ARC 15505::IRGC 42066-1
IRIS_313-11285	4678469	29635224	0.1579	India	inc	SAC	XI-2	ARC 18064::IRGC 42237-1
IRIS_313-8530	4677079	29635224	0.1578	India	T	SAC	XI-2	DHANE BURWA::IRGC 10105-1
IRIS_313-11280	4670525	29635224	0.1576	India	inc	SAC	XI-adm	ARC 15486::IRGC 42055-3
IRIS_313-11604	4667249	29635224	0.1575	India	inc	SAC	cA (Aus)	SUGARKAND::IRGC 61059-1
B040	4665397	29635224	0.1574	India	T	SAC	XI-adm	K 24
CX120	4662431	29635224	0.1573	India	P	SAC	XI-adm	TKM 6
IRIS_313-11375	4659718	29635224	0.1572	India	inc	SAC	cB (Bas)	CODE NO 31225::IRGC 46865-2
IRIS_313-9403	4643669	29635224	0.1567	India	T	SAC	XI-2	BADUIE::IRGC 53715-1
IRIS_313-10847	4645320	29635224	0.1567	India	inc	SAC	XI-adm	ARC 6015::IRGC 20314-2
IRIS_313-9629	4641344	29635224	0.1566	India	inc	SAC	cB (Bas)	JC 157::IRGC 9074-1
IRIS_313-11264	4641590	29635224	0.1566	India	inc	SAC	XI-adm	ARC 13934::IRGC 41325-2
IRIS_313-10628	4632292	29635224	0.1563	India	T	SAC	XI-2	O. SATIVA::IRGC 10164-2
IRIS_313-9605	4629334	29635224	0.1562	India	T	SAC	XI-1A	NCS 194::IRGC 51932-1
IRIS_313-10894	4630068	29635224	0.1562	India	inc	SAC	admix	ARC 13204::IRGC 22558-1
CX153	4625402	29635224	0.1561	India	P	SAC	XI-2	Jalmagna
IRIS_313-11302	4623978	29635224	0.156	India	inc	SAC	XI-adm	ARC 14899::IRGC 43016-1
IRIS_313-11647	4623773	29635224	0.156	India	inc	SAC	XI-2	NCS 809 A::IRGC 62502-1
IRIS_313-10526	4619832	29635224	0.1559	India	inc	SAC	XI-2	CO 2::IRGC 6186-2
IRIS_313-11617	4614376	29635224	0.1557	India	T	SAC	cA (Aus)	UPRH 33::IRGC 61505-1
CX99	4597447	29635224	0.1551	India	P	SAC	XI-2	Doddi
IRIS_313-11268	4595678	29635224	0.1551	India	inc	SAC	cB (Bas)	ARC 14398::IRGC 41544-2
IRIS_313-11476	4593148	29635224	0.155	India	inc	SAC	cA (Aus)	KALIPINCH::IRGC 53271-1
IRIS_313-11943	4591533	29635224	0.1549	Nepal	inc	SAC	XI-1A	I 41::IRGC 75927-1
IRIS_313-8986	4581008	29635224	0.1546	India	T	SAC	XI-adm	ARC 10754::IRGC 12603-1
CX3	4579190	29635224	0.1545	Bangladesh	I	SAC	XI-1A	BR 24
CX98	4578616	29635224	0.1545	India	P	SAC	XI-2	Doddabyranella
IRIS_313-8712	4576243	29635224	0.1544	India	inc	SAC	cB (Bas)	ARC 13829::IRGC 42469-1
IRIS_313-11262	4574877	29635224	0.1544	India	inc	SAC	XI-adm	ARC 13888::IRGC 41288-2
IRIS_313-11460	4563860	29635224	0.154	India	T	SAC	XI-2	SELHI::IRGC 52760-1
IRIS_313-8453	4542566	29635224	0.1533	India	inc	SAC	XI-adm	ARC 18597::IRGC 43299-1
IRIS_313-10666	4543391	29635224	0.1533	India	inc	SAC	XI-adm	ARC 6218::IRGC 12255-1
IRIS_313-12052	4535943	29635224	0.1531	India	T	SAC	XI-adm	ADUKKAN::IRGC 81783-1
CX160	4534041	29635224	0.153	India	P	SAC	XI-2	W 1263
IRIS_313-8988	4531084	29635224	0.1529	India	T	SAC	XI-2	BANIKAT::IRGC 67720-1
IRIS_313-8606	4524711	29635224	0.1527	India	P	SAC	XI-3	AC 13 (T 141)::IRGC 5456-1
IRIS_313-11919	4518492	29635224	0.1525	India	T	SAC	XI-2	LAKHA KUAR::IRGC 74760-1
IRIS_313-11493	4510480	29635224	0.1522	India	T	SAC	XI-adm	AR 133::IRGC 53942-1
IRIS_313-10881	4497608	29635224	0.1518	India	inc	SAC	admix	ARC 12413::IRGC 22044-1
IRIS_313-8967	4496262	29635224	0.1517	India	inc	SAC	XI-adm	ARC 12576::IRGC 22163-1
IRIS_313-10933	4495212	29635224	0.1517	India	inc	SAC	cB (Bas)	ARC 7281::IRGC 24252-2
IRIS_313-11826	4497038	29635224	0.1517	India	T	SAC	cB (Bas)	HIRA NAKHI::IRGC 70840-1
IRIS_313-8386	4478532	29635224	0.1511	India	inc	SAC	XI-adm	ARC 10812::IRGC 21074-1
IRIS_313-11265	4474600	29635224	0.151	India	inc	SAC	cA (Aus)	ARC 14150::IRGC 41435-2
IRIS_313-11277	4463716	29635224	0.1506	India	inc	SAC	cA (Aus)	ARC 15129::IRGC 41938-1
IRIS_313-9384	4460333	29635224	0.1505	India	T	SAC	XI-2	BARIK KUDI::IRGC 52807-1
IRIS_313-11256	4453165	29635224	0.1503	India	inc	SAC	XI-adm	ARC 12411::IRGC 41047-2
IRIS_313-11362	4443760	29635224	0.1499	India	inc	SAC	cB (Bas)	KEYA NUNIA::IRGC 46117-2
CX155	4440528	29635224	0.1498	India	T	SAC	XI-2	Madhukar
IRIS_313-11742	4436305	29635224	0.1497	India	inc	SAC	cA (Aus)	KALIBAJARI::IRGC 67718-1
IRIS_313-9190	4431703	29635224	0.1495	India	inc	SAC	XI-adm	CODE NO 31323::IRGC 46907-1
IRIS_313-11372	4429385	29635224	0.1495	India	inc	SAC	XI-2	SUFALDHULA::IRGC 46698-2
IRIS_313-11918	4412999	29635224	0.1489	India	T	SAC	XI-2	DILBAKSH::IRGC 74738-1
IRIS_313-10859	4408058	29635224	0.1487	India	inc	SAC	XI-adm	ARC 10939::IRGC 21150-2
IRIS_313-10531	4403576	29635224	0.1486	India	P	SAC	admix	HR 22::IRGC 6394-1
IRIS_313-8813	4401093	29635224	0.1485	India	inc	SAC	cB (Bas)	ARC 10497::IRGC 12485-1
IRIS_313-10988	4400500	29635224	0.1485	India	P	SAC	XI-adm	CO 36::IRGC 26847-2
IRIS_313-11247	4390130	29635224	0.1481	India	I	SAC	XI-adm	RP 1153-20-14::IRGC 40131-2
IRIS_313-11245	4378741	29635224	0.1478	India	P	SAC	XI-adm	RP 20-12::IRGC 40031-2
B049	4373367	29635224	0.1476	Nepal	inc	SAC	cA (Aus)	Zacaodao 13
IRIS_313-11352	4367434	29635224	0.1474	India	inc	SAC	cB (Bas)	BUCHI::IRGC 45237-2
IRIS_313-11270	4364565	29635224	0.1473	India	inc	SAC	cB (Bas)	ARC 14663::IRGC 41671-2
IRIS_313-8305	4345922	29635224	0.1466	India	T	SAC	XI-2	URAIBOOL::IRGC 52785-1
IRIS_313-8385	4337343	29635224	0.1464	India	P	SAC	cB (Bas)	JC 149::IRGC 9070-1
IRIS_313-10863	4335185	29635224	0.1463	India	inc	SAC	XI-2	ARC 11322::IRGC 21315-2
IRIS_313-11489	4335710	29635224	0.1463	India	inc	SAC	cA (Aus)	KALU T 139::IRGC 53670-1
IRIS_313-9172	4333527	29635224	0.1462	India	inc	SAC	cB (Bas)	ARC 7229::IRGC 12331-1
IRIS_313-11564	4322777	29635224	0.1459	Nepal	T	SAC	cB (Bas)	HALIDA::IRGC 59005-1
IRIS_313-11627	4324415	29635224	0.1459	Nepal	T	SAC	cB (Bas)	JADO::IRGC 61966-1
IRIS_313-11303	4314538	29635224	0.1456	India	inc	SAC	XI-adm	ARC 15097::IRGC 43053-1
IRIS_313-11266	4285932	29635224	0.1446	India	inc	SAC	XI-adm	ARC 14347::IRGC 41517-2
IRIS_313-11244	4275010	29635224	0.1443	India	inc	SAC	XI-adm	W 1014-162::IRGC 39871-1
IRIS_313-11632	4274915	29635224	0.1443	Nepal	T	SAC	cB (Bas)	SETO JHINUWA::IRGC 62043-1
IRIS_313-11642	4277773	29635224	0.1443	India	inc	SAC	XI-2	NCS 599::IRGC 62373-1
CX97	4270520	29635224	0.1441	India	P	SAC	XI-1B	Budda
IRIS_313-10521	4269564	29635224	0.1441	India	inc	SAC	cB (Bas)	SANNABATHA::IRGC 5971-1
IRIS_313-11416	4269943	29635224	0.1441	India	inc	SAC	XI-2	KONAMANI::IRGC 49806-1
CX288	4266244	29635224	0.144	India	P	SAC	XI-adm	D 11
IRIS_313-11267	4266732	29635224	0.144	India	inc	SAC	XI-2	ARC 14358::IRGC 41523-2
IRIS_313-10732	4259491	29635224	0.1437	Nepal	inc	SAC	cB (Bas)	MADHUWA KARIA::IRGC 16138-2
IRIS_313-9023	4242526	29635224	0.1432	India	P	SAC	XI-adm	CR 60-10::IRGC 15777-1
IRIS_313-11451	4245025	29635224	0.1432	India	T	SAC	cB (Bas)	KALISAL::IRGC 52324-1
IRIS_313-10670	4235816	29635224	0.1429	India	inc	SAC	cB (Bas)	ARC 10296::IRGC 12421-2
IRIS_313-11648	4234916	29635224	0.1429	India	inc	SAC	XI-2	NCS 830::IRGC 62518-1
IRIS_313-11356	4228843	29635224	0.1427	India	P	SAC	cB (Bas)	CR 44-1::IRGC 45397-1
IRIS_313-11822	4228736	29635224	0.1427	India	T	SAC	XI-2	BHONDU PAREWA::IRGC 70802-3
IRIS_313-11373	4220321	29635224	0.1424	India	inc	SAC	cB (Bas)	T 3::IRGC 46760-2
IRIS_313-11567	4221452	29635224	0.1424	Nepal	T	SAC	cB (Bas)	RATO BASMATI::IRGC 59205-1
IRIS_313-11263	4216844	29635224	0.1423	India	inc	SAC	XI-adm	ARC 13919::IRGC 41313-2
IRIS_313-9392	4202523	29635224	0.1418	India	inc	SAC	admix	ARC 11626::IRGC 21528-1
IRIS_313-10857	4183540	29635224	0.1412	India	inc	SAC	admix	ARC 10825::IRGC 21082-1
IRIS_313-10871	4172697	29635224	0.1408	India	inc	SAC	cA (Aus)	ARC 11777::IRGC 21639-1
IRIS_313-11273	4169126	29635224	0.1407	India	inc	SAC	XI-adm	ARC 14860::IRGC 41793-2
IRIS_313-11350	4159120	29635224	0.1403	India	inc	SAC	cB (Bas)	BAJAL::IRGC 45024-2
IRIS_313-11644	4145456	29635224	0.1399	India	inc	SAC	XI-2	NCS 745::IRGC 62466-1
IRIS_313-11290	4136332	29635224	0.1396	India	inc	SAC	admix	ARC 6579::IRGC 42510-1
CX227	4125600	29635224	0.1392	India	T	SAC	cA (Aus)	KASALATH
IRIS_313-12183	4111358	29635224	0.1387	Nepal	T	SAC	cA (Aus)	SETYA::IRGC 88654-1
IRIS_313-11298	4100234	29635224	0.1384	India	inc	SAC	cA (Aus)	ARC 13544::IRGC 42743-1
IRIS_313-11453	4083903	29635224	0.1378	India	T	SAC	XI-2	ZINYA KOLAMBA::IRGC 52402-1
IRIS_313-10861	4078996	29635224	0.1376	India	inc	SAC	cA (Aus)	ARC 11276::IRGC 21278-1
IRIS_313-10852	4065518	29635224	0.1372	India	inc	SAC	cA (Aus)	ARC 7336::IRGC 20606-1
IRIS_313-10883	4057067	29635224	0.1369	India	inc	SAC	admix	ARC 12490::IRGC 22095-1
IRIS_313-11278	4049141	29635224	0.1366	India	inc	SAC	XI-adm	ARC 15319::IRGC 42007-1
IRIS_313-11824	4048758	29635224	0.1366	India	T	SAC	XI-2	DHANIYA PHOOL::IRGC 70811-1
IRIS_313-10864	4036404	29635224	0.1362	India	inc	SAC	admix	ARC 11338::IRGC 21329-1
IRIS_313-10892	4027654	29635224	0.1359	India	inc	SAC	cA (Aus)	ARC 12920::IRGC 22450-1
IRIS_313-11823	4022386	29635224	0.1357	India	T	SAC	XI-2	BHU BHUSI::IRGC 70803-1
IRIS_313-11625	4007457	29635224	0.1352	Nepal	T	SAC	cB (Bas)	CHOBO::IRGC 61930-1
IRIS_313-11643	3975761	29635224	0.1342	India	inc	SAC	XI-1B	NCS 603 B::IRGC 62377-1
IRIS_313-11645	3962991	29635224	0.1337	India	inc	SAC	XI-2	NCS 766::IRGC 62478-1
IRIS_313-11821	3963197	29635224	0.1337	India	T	SAC	XI-2	19::IRGC 70786-1
IRIS_313-11295	3957892	29635224	0.1336	India	inc	SAC	admix	ARC 11397::IRGC 42664-1
IRIS_313-11646	3945956	29635224	0.1332	India	inc	SAC	XI-2	NCS 771 A::IRGC 62483-1
IRIS_313-11630	3941764	29635224	0.133	Nepal	T	SAC	cB (Bas)	POHHERLIMASION::IRGC 62025-1
IRIS_313-9120	3936311	29635224	0.1328	India	inc	SAC	admix	SONAPATNAI::IRGC 46695-1
IRIS_313-11738	3921701	29635224	0.1323	India	T	SAC	XI-2	PAUNDRI::IRGC 67527-1
IRIS_313-8999	3917977	29635224	0.1322	India	inc	SAC	GJ-sbtrp	ARC 11430 B::IRGC 14567-1
CX149	3902312	29635224	0.1317	India	P	SAC	cB (Bas)	Karnal Local
IRIS_313-10858	3899861	29635224	0.1316	India	inc	SAC	XI-adm	ARC 10894::IRGC 21122-1
IRIS_313-11956	3899593	29635224	0.1316	Nepal	inc	SAC	admix	JUNGEMARSI::IRGC 76901-1
IRIS_313-10867	3821816	29635224	0.129	India	inc	SAC	GJ-sbtrp	ARC 11538::IRGC 21463-1
IRIS_313-10884	3795658	29635224	0.1281	India	inc	SAC	GJ-sbtrp	ARC 12493::IRGC 22098-1
B012	3787387	29635224	0.1278	India	inc	SAC	XI-2	2037 (Rajahamsal)
IRIS_313-10862	3786620	29635224	0.1278	India	inc	SAC	GJ-adm	ARC 11281::IRGC 21283-1
IRIS_313-11626	3779155	29635224	0.1275	Nepal	T	SAC	cB (Bas)	GUDURA::IRGC 61955-1
IRIS_313-10874	3774688	29635224	0.1274	India	inc	SAC	GJ-sbtrp	ARC 11946::IRGC 21768-2
IRIS_313-11737	3768937	29635224	0.1272	India	T	SAC	cA (Aus)	CHUNDI::IRGC 67486-1
IRIS_313-11297	3728881	29635224	0.1258	India	inc	SAC	admix	ARC 13460::IRGC 42732-2
IRIS_313-10866	3718626	29635224	0.1255	India	inc	SAC	GJ-sbtrp	ARC 11478::IRGC 21418-1
IRIS_313-11242	3673154	29635224	0.1239	India	I	SAC	XI-2	OR 117-8::IRGC 39680-2
IRIS_313-11258	3668726	29635224	0.1238	India	inc	SAC	cB (Bas)	ARC 13502::IRGC 41126-2
IRIS_313-10865	3641768	29635224	0.1229	India	inc	SAC	GJ-sbtrp	ARC 11424::IRGC 21380-2
CX132	3590813	29635224	0.1212	India	P	SAC	GJ-trp	AP 423
IRIS_313-10893	3550198	29635224	0.1198	India	inc	SAC	GJ-sbtrp	ARC 13156::IRGC 22514-1
IRIS_313-8935	3538669	29635224	0.1194	India	inc	SAC	XI-adm	ARC 18061::IRGC 47650-1
IRIS_313-10853	3528343	29635224	0.1191	India	inc	SAC	GJ-adm	ARC 10028::IRGC 20656-2
CX108	3527187	29635224	0.119	India	P	SAC	admix	Ziri
IRIS_313-10848	3509965	29635224	0.1184	India	inc	SAC	GJ-sbtrp	ARC 6188::IRGC 20370-1
IRIS_313-11671	3484894	29635224	0.1176	Nepal	T	SAC	XI-2	DERAWA::IRGC 64106-1
IRIS_313-11260	3479798	29635224	0.1174	India	inc	SAC	XI-adm	ARC 13591::IRGC 41177-2
IRIS_313-11289	3475072	29635224	0.1173	India	inc	SAC	cB (Bas)	ARC 18578::IRGC 42459-2
IRIS_313-7933	3459851	29635224	0.1167	Nepal	T	SAC	admix	KAKANI 2::IRGC 13373-C1
IRIS_313-11279	3458388	29635224	0.1167	India	inc	SAC	XI-adm	ARC 15455::IRGC 42040-2
IRIS_313-11156	3437953	29635224	0.116	India	I	SAC	GJ-adm	KHUDWANI ACC 202::IRGC 34154-1
IRIS_313-11479	3425445	29635224	0.1156	India	inc	SAC	GJ-trp	VANKALI::IRGC 53339-1
IRIS_313-10890	3405936	29635224	0.1149	India	inc	SAC	GJ-sbtrp	ARC 12861::IRGC 22395-1
IRIS_313-10851	3365303	29635224	0.1136	India	inc	SAC	cB (Bas)	ARC 7296::IRGC 20585-1
IRIS_313-10895	3357827	29635224	0.1133	India	inc	SAC	GJ-sbtrp	ARC 13257::IRGC 22608-1
IRIS_313-10888	3340218	29635224	0.1127	India	inc	SAC	GJ-sbtrp	ARC 12726::IRGC 22288-2
IRIS_313-10886	3283451	29635224	0.1108	India	inc	SAC	GJ-sbtrp	ARC 12655::IRGC 22226-2
IRIS_313-11153	3251662	29635224	0.1097	India	I	SAC	GJ-tmp	CT 45::IRGC 34027-2
IRIS_313-11494	3221866	29635224	0.1087	India	T	SAC	GJ-sbtrp	IC 25690::IRGC 53973-1
IRIS_313-11257	3199809	29635224	0.108	India	inc	SAC	XI-adm	ARC 12757::IRGC 41095-2
IRIS_313-9201	3190934	29635224	0.1077	India	inc	SAC	GJ-trp	ARC 6044::IRGC 12190-1
IRIS_313-10889	3163372	29635224	0.1067	India	inc	SAC	GJ-sbtrp	ARC 12730::IRGC 22291-1
IRIS_313-11825	3161402	29635224	0.1067	India	T	SAC	cB (Bas)	HANSRAJ::IRGC 70836-3
IRIS_313-9176	3077689	29635224	0.1039	India	inc	SAC	GJ-adm	ARC 11359::IRGC 21348-1
IRIS_313-8326	2994801	29635224	0.1011	India	inc	SAC	cB (Bas)	JC 1::IRGC 9091-1
IRIS_313-11155	2954913	29635224	0.09971	India	inc	SAC	GJ-tmp	K 113::IRGC 34107-1
IRIS_313-10834	2931543	29635224	0.09892	India	I	SAC	GJ-sbtrp	IARI 11387::IRGC 19573-1
IRIS_313-11269	2703291	29635224	0.09122	India	inc	SAC	XI-adm	ARC 14632::IRGC 41650-2
IRIS_313-10870	2688850	29635224	0.09073	India	inc	SAC	GJ-sbtrp	ARC 11768::IRGC 21630-1
CX109	2595800	29635224	0.08759	India	P	SAC	GJ-adm	Dacca 6
IRIS_313-8147	2293188	29635224	0.07738	India	inc	SAC	GJ-tmp	T 757::GERVEX 1316-C1
IRIS_313-10850	2186181	29635224	0.07377	India	inc	SAC	admix	ARC 7263::IRGC 20570-2
IRIS_313-10872	2099421	29635224	0.07084	India	inc	SAC	GJ-adm	ARC 11802::IRGC 21662-2
IRIS_313-11198	1689611	29635224	0.05701	India	P	SAC	GJ-tmp	K 78-13::IRGC 36794-2
IRIS_313-11672	1278644	29635224	0.04315	Nepal	T	SAC	GJ-tmp	RAI MANULA::IRGC 64138-1
IRIS_313-10539	8231076	29635224	0.2777	Bangladesh	P	SAE	XI-2	BADAL 76::IRGC 6586-1
IRIS_313-10964	7194555	29635224	0.2428	Bangladesh	T	SAE	cA (Aus)	SADUMONI::IRGC 25919-1
IRIS_313-11111	7194973	29635224	0.2428	Bangladesh	T	SAE	cA (Aus)	SAITA::IRGC 31618-1
IRIS_313-11154	7097150	29635224	0.2395	Bangladesh	inc	SAE	cA (Aus)	DHARIAL::IRGC 34034-1
IRIS_313-10606	7093848	29635224	0.2394	Bangladesh	P	SAE	cA (Aus)	DV 110::IRGC 8855-1
IRIS_313-9108	7077143	29635224	0.2388	Bangladesh	T	SAE	XI-adm	RAYADA::IRGC 27594-1
IRIS_313-10593	7061205	29635224	0.2383	Bangladesh	P	SAE	cA (Aus)	DJ 47::IRGC 8497-1
IRIS_313-10600	6935289	29635224	0.234	Bangladesh	P	SAE	cA (Aus)	UCP 41::IRGC 8742-1
IRIS_313-10595	6873706	29635224	0.2319	Bangladesh	P	SAE	cA (Aus)	DL 5::IRGC 8593-1
IRIS_313-10341	6739755	29635224	0.2274	Bangladesh	I	SAE	XI-adm	BR 5230-46-4::IRGC 117318-1
IRIS_313-11116	6737697	29635224	0.2274	Bangladesh	T	SAE	cA (Aus)	KORTIK KAIKA::IRGC 31841-1
IRIS_313-8283	6700716	29635224	0.2261	Bangladesh	T	SAE	cA (Aus)	KOYRA::IRGC 77267-1
IRIS_313-10594	6679503	29635224	0.2254	Bangladesh	P	SAE	cA (Aus)	DJ 29::IRGC 8505-1
IRIS_313-11123	6635710	29635224	0.2239	Bangladesh	P	SAE	cA (Aus)	BAZAIL 975::IRGC 32816-2
IRIS_313-11120	6606514	29635224	0.2229	Bhutan	T	SAE	XI-2	GURULEY::IRGC 32441-1
IRIS_313-11125	6495707	29635224	0.2192	Bangladesh	P	SAE	admix	DHALA AMAN 973::IRGC 32861-1
IRIS_313-11203	6413597	29635224	0.2164	Bangladesh	T	SAE	XI-2	GOCHIAGARI::IRGC 37086-2
IRIS_313-8252	6369904	29635224	0.2149	Bangladesh	T	SAE	cA (Aus)	JAGLI BORO::IRGC 27516-2
IRIS_313-8854	6358677	29635224	0.2146	Bangladesh	T	SAE	XI-2	CHAKOL::IRGC 77226-1
IRIS_313-11213	6310833	29635224	0.213	Bangladesh	T	SAE	cA (Aus)	NARIKEL BADI::IRGC 37550-1
IRIS_313-11065	6282807	29635224	0.212	Bangladesh	P	SAE	cA (Aus)	BORO 394::IRGC 29297-2
IRIS_313-10592	6239158	29635224	0.2105	Bangladesh	P	SAE	cA (Aus)	DJ 69::IRGC 8482-1
IRIS_313-10971	6156581	29635224	0.2077	Bangladesh	T	SAE	XI-2	BADAL::IRGC 26290-2
IRIS_313-11163	6151645	29635224	0.2076	Bangladesh	T	SAE	cA (Aus)	NATEL BORO::IRGC 34749-1
IRIS_313-11212	6140601	29635224	0.2072	Bangladesh	T	SAE	XI-2	KALOBONA::IRGC 37478-2
IRIS_313-10604	6105902	29635224	0.206	Bangladesh	P	SAE	cA (Aus)	DV 2::IRGC 8806-1
IRIS_313-11114	6094290	29635224	0.2056	Bangladesh	T	SAE	XI-2	BIRUI SAIL::IRGC 31745-2
IRIS_313-11115	6063649	29635224	0.2046	Bangladesh	T	SAE	XI-2	KALA MUNA::IRGC 31832-2
IRIS_313-11207	6055302	29635224	0.2043	Bangladesh	T	SAE	XI-2	PAIRJAT::IRGC 37252-2
IRIS_313-11124	6029346	29635224	0.2035	Bangladesh	P	SAE	admix	BAZAIL 980::IRGC 32817-2
IRIS_313-8632	6012984	29635224	0.2029	Bangladesh	T	SAE	XI-2	PATMADHAI 1::IRGC 77292-1
IRIS_313-11326	5985703	29635224	0.202	Bangladesh	I	SAE	XI-adm	BR 51-115-4::IRGC 43999-1
IRIS_313-11219	5975921	29635224	0.2016	Bangladesh	P	SAE	XI-2	BLACK 28-564::IRGC 37815-2
IRIS_313-8789	5970242	29635224	0.2015	Bangladesh	T	SAE	cA (Aus)	LALSAITA::IRGC 43915-1
IRIS_313-11482	5965326	29635224	0.2013	Bangladesh	T	SAE	cA (Aus)	BONGEZA::IRGC 53483-1
IRIS_313-11216	5961435	29635224	0.2012	Bangladesh	P	SAE	cA (Aus)	KHAMA 1183::IRGC 37685-2
IRIS_313-9218	5911588	29635224	0.1995	Bangladesh	T	SAE	XI-2	KALO CHAKOL::IRGC 77258-1
IRIS_313-10985	5905488	29635224	0.1993	Bangladesh	T	SAE	XI-2	GOBOL SAIL (BALAM)::IRGC 26624-2
IRIS_313-11208	5885687	29635224	0.1986	Bangladesh	T	SAE	XI-adm	PARIJAT::IRGC 37272-2
IRIS_313-11227	5883543	29635224	0.1985	Bangladesh	P	SAE	XI-2	SADAJIRA 19-317::IRGC 38344-2
IRIS_313-10982	5873742	29635224	0.1982	Bangladesh	T	SAE	XI-2	LUDI GOCHYA::IRGC 26504-2
IRIS_313-9368	5851750	29635224	0.1975	Bangladesh	T	SAE	cA (Aus)	CHANDARHAT::IRGC 25845-1
IRIS_313-10972	5846852	29635224	0.1973	Bangladesh	T	SAE	XI-2	DUDA MONOR::IRGC 26335-2
IRIS_313-11061	5847233	29635224	0.1973	Bangladesh	P	SAE	cA (Aus)	AUS 449::IRGC 29230-1
IRIS_313-11404	5841838	29635224	0.1971	Bangladesh	inc	SAE	XI-2	AMON 4::IRGC 49375-2
IRIS_313-10587	5819229	29635224	0.1964	Bangladesh	P	SAE	cA (Aus)	DB 3::IRGC 8361-1
IRIS_313-11210	5798979	29635224	0.1957	Bangladesh	T	SAE	cA (Aus)	ZARBASAIL::IRGC 37346-1
IRIS_313-10983	5778954	29635224	0.195	Bangladesh	T	SAE	XI-adm	BOROJYOT::IRGC 26578-2
IRIS_313-11060	5770257	29635224	0.1947	Bangladesh	P	SAE	cA (Aus)	AUS 359::IRGC 29146-2
IRIS_313-10973	5752629	29635224	0.1941	Bangladesh	T	SAE	XI-2	KALA DIGHA::IRGC 26367-2
CX2	5740758	29635224	0.1937	Bangladesh	P	SAE	XI-adm	BR 11
IRIS_313-11019	5730249	29635224	0.1934	Bangladesh	T	SAE	cA (Aus)	PORANG::IRGC 27577-1
IRIS_313-11014	5719183	29635224	0.193	Bangladesh	T	SAE	cA (Aus)	CHAKILA::IRGC 27540-1
IRIS_313-10598	5716452	29635224	0.1929	Bangladesh	P	SAE	cA (Aus)	DD 126::IRGC 8667-1
IRIS_313-11211	5706450	29635224	0.1926	Bangladesh	T	SAE	XI-2	KADAMSAIL::IRGC 37468-2
IRIS_313-10979	5699832	29635224	0.1923	Bangladesh	T	SAE	cA (Aus)	BORA DIGA::IRGC 26439-1
IRIS_313-8737	5674109	29635224	0.1915	Bangladesh	P	SAE	XI-2	SADAJIRA 19-287::IRGC 38320-1
IRIS_313-10981	5676210	29635224	0.1915	Bangladesh	T	SAE	cA (Aus)	JHUL DIGA::IRGC 26478-1
IRIS_313-8683	5645294	29635224	0.1905	Bangladesh	T	SAE	XI-2	JOTA BITCHI 1::IRGC 77253-1
IRIS_313-11486	5643389	29635224	0.1904	Bangladesh	T	SAE	admix	KHAGRAI DIGHA::IRGC 53529-3
IRIS_313-11067	5632245	29635224	0.1901	Bangladesh	P	SAE	cA (Aus)	KALIBORO 600::IRGC 29367-1
IRIS_313-10974	5627118	29635224	0.1899	Bangladesh	T	SAE	XI-2	KAMRANGA::IRGC 26373-2
IRIS_313-8850	5620885	29635224	0.1897	Bangladesh	T	SAE	XI-2	ASHMBER::IRGC 27522-1
IRIS_313-8822	5608944	29635224	0.1893	Bangladesh	P	SAE	cA (Aus)	STRAW 23-400::IRGC 38390-1
IRIS_313-8963	5601064	29635224	0.189	Bangladesh	T	SAE	cA (Aus)	BATHURI::IRGC 25838-1
IRIS_313-9696	5599678	29635224	0.189	Bangladesh	T	SAE	XI-adm	NAZIRA SAIL::IRGC 77284-1
IRIS_313-9325	5596969	29635224	0.1889	Bangladesh	T	SAE	XI-1B	SADA RUPA::IRGC 77299-1
IRIS_313-11322	5582471	29635224	0.1884	Bangladesh	T	SAE	cA (Aus)	JASURE AUS::IRGC 43860-1
IRIS_313-11214	5577339	29635224	0.1882	Bangladesh	T	SAE	cA (Aus)	SHITTA AMAN::IRGC 37596-1
IRIS_313-9445	5568239	29635224	0.1879	Bangladesh	T	SAE	admix	KOIYA DIGHA::IRGC 63517-1
IRIS_313-8721	5549808	29635224	0.1873	Bangladesh	T	SAE	cA (Aus)	HOLOI BASH (SOLOI BASH)::IRGC 64778-1
IRIS_313-9391	5548655	29635224	0.1872	Bangladesh	T	SAE	XI-2	KALABAIL::IRGC 25877-1
IRIS_313-11209	5530713	29635224	0.1866	Bangladesh	T	SAE	XI-2	VADAI::IRGC 37341-3
IRIS_313-8509	5520067	29635224	0.1863	Bangladesh	T	SAE	XI-2	PUILLIPINA KATARI::IRGC 77293-1
IRIS_313-9661	5521585	29635224	0.1863	Bangladesh	T	SAE	cA (Aus)	LENJA MURALI::IRGC 66815-1
IRIS_313-11013	5467150	29635224	0.1845	Bangladesh	T	SAE	cA (Aus)	BOTESWAR 2::IRGC 27536-1
IRIS_313-11402	5450121	29635224	0.1839	Bangladesh	T	SAE	XI-adm	SUITE JORA::IRGC 49257-2
IRIS_313-9139	5447714	29635224	0.1838	Bangladesh	T	SAE	XI-2	GOJOL GORIA::IRGC 26629-1
IRIS_313-9606	5410880	29635224	0.1826	Bangladesh	P	SAE	XI-2	DA 11::IRGC 6046-1
IRIS_313-9049	5382021	29635224	0.1816	Bangladesh	P	SAE	XI-2	PATNAI 31-675::IRGC 38145-1
IRIS_313-8932	5370892	29635224	0.1812	Bangladesh	T	SAE	XI-3	PATISAIL::IRGC 37562-1
IRIS_313-11220	5364829	29635224	0.181	Bangladesh	P	SAE	XI-2	CHITRAJ 14-134::IRGC 37837-2
IRIS_313-10978	5357884	29635224	0.1808	Bangladesh	T	SAE	XI-adm	PANI TORONG::IRGC 26411-1
IRIS_313-11481	5357783	29635224	0.1808	Bangladesh	T	SAE	cA (Aus)	BINNAFUL::IRGC 53479-1
IRIS_313-11017	5356255	29635224	0.1807	Bangladesh	T	SAE	cA (Aus)	LOROI::IRGC 27567-1
IRIS_313-11018	5348585	29635224	0.1805	Bangladesh	T	SAE	cA (Aus)	MADISA::IRGC 27568-1
IRIS_313-11399	5346320	29635224	0.1804	Bangladesh	T	SAE	XI-adm	RAYDHAN 1::IRGC 49127-2
IRIS_313-8321	5336405	29635224	0.1801	Bangladesh	P	SAE	cA (Aus)	BHADOIA 303::IRGC 6588-1
IRIS_313-11400	5338453	29635224	0.1801	Bangladesh	T	SAE	XI-adm	ECHORSAIL::IRGC 49182-1
IRIS_313-11222	5323358	29635224	0.1796	Bangladesh	P	SAE	XI-2	DUDHSWAR 15-157::IRGC 37967-2
IRIS_313-11063	5307220	29635224	0.1791	Bangladesh	P	SAE	cA (Aus)	BORO 70-2::IRGC 29283-3
IRIS_313-11231	5289697	29635224	0.1785	Bangladesh	P	SAE	XI-2	STRAW 23-471::IRGC 38456-3
IRIS_313-8437	5260884	29635224	0.1775	Bangladesh	T	SAE	XI-adm	IRRIBINI::IRGC 49094-1
B104	5254199	29635224	0.1773	Bangladesh	T	SAE	XI-1A	Jiabala
IRIS_313-10340	5251069	29635224	0.1772	Bangladesh	I	SAE	XI-adm	BR 4973-34-6-6::IRGC 117317-1
IRIS_313-10987	5252822	29635224	0.1772	Bangladesh	T	SAE	cA (Aus)	SUNGA WALA::IRGC 26802-2
IRIS_313-11230	5243969	29635224	0.177	Bangladesh	P	SAE	XI-2	STRAW 23-438::IRGC 38426-2
IRIS_313-11558	5242791	29635224	0.1769	Bangladesh	T	SAE	XI-2	NULI::IRGC 58824-1
IRIS_313-9626	5213577	29635224	0.1759	Bangladesh	T	SAE	cA (Aus)	KALIA::IRGC 34699-1
IRIS_313-11557	5209988	29635224	0.1758	Bangladesh	T	SAE	cA (Aus)	GORIA::IRGC 58736-1
IRIS_313-10930	5202397	29635224	0.1755	Bangladesh	P	SAE	cA (Aus)	PANKHIRAJ::IRGC 24139-1
IRIS_313-11982	5188529	29635224	0.1751	Bangladesh	T	SAE	cA (Aus)	PORASHI::IRGC 78397-1
IRIS_313-12002	5187408	29635224	0.175	Bangladesh	T	SAE	cA (Aus)	LARA BORO::IRGC 79342-1
IRIS_313-10963	5172159	29635224	0.1745	Bangladesh	T	SAE	cA (Aus)	KATAKCHIKON::IRGC 25880-1
IRIS_313-10976	5172305	29635224	0.1745	Bangladesh	T	SAE	cA (Aus)	LAKHSMI DIGHA::IRGC 26390-2
IRIS_313-10977	5155518	29635224	0.174	Bangladesh	T	SAE	XI-2	MATI CHAL::IRGC 26399-2
IRIS_313-11323	5156887	29635224	0.174	Bangladesh	T	SAE	cA (Aus)	JHORA::IRGC 43862-1
IRIS_313-9174	5143652	29635224	0.1736	Bangladesh	T	SAE	XI-2	KUSHIARA::IRGC 34709-1
IRIS_313-11049	5125428	29635224	0.173	Bangladesh	P	SAE	cA (Aus)	AUS 219::IRGC 29031-1
IRIS_313-11226	5120931	29635224	0.1728	Bangladesh	P	SAE	XI-2	SADAJIRA 19-258::IRGC 38293-2
IRIS_313-10984	5114664	29635224	0.1726	Bangladesh	T	SAE	XI-2	DUDHSAR::IRGC 26609-2
IRIS_313-11487	5114090	29635224	0.1726	Bangladesh	T	SAE	XI-2	LALDIGHA::IRGC 53541-1
IRIS_313-9072	5105138	29635224	0.1723	Bangladesh	T	SAE	XI-2	MUTA GANJE::IRGC 26744-1
IRIS_313-10602	5105495	29635224	0.1723	Bangladesh	P	SAE	cA (Aus)	DM 49::IRGC 8775-1
IRIS_313-11221	5106749	29635224	0.1723	Bangladesh	P	SAE	XI-2	CYLINDRICAL 30-605::IRGC 37845-2
IRIS_313-11964	5107172	29635224	0.1723	Bangladesh	T	SAE	XI-2	VUOTTA SAIL::IRGC 77306-1
IRIS_313-9422	5099645	29635224	0.1721	Bangladesh	T	SAE	cA (Aus)	CHUNGUR BALI::IRGC 25855-1
IRIS_313-11070	5099736	29635224	0.1721	Bangladesh	P	SAE	admix	TUPA::IRGC 29432-1
IRIS_313-9271	5095857	29635224	0.172	Bangladesh	T	SAE	XI-2	PURA BINNI::IRGC 26772-1
IRIS_313-10537	5080149	29635224	0.1714	Bangladesh	P	SAE	admix	KALAMON 113::IRGC 6534-3
IRIS_313-11015	5077483	29635224	0.1713	Bangladesh	T	SAE	cA (Aus)	HANPA::IRGC 27547-2
IRIS_313-9617	5061881	29635224	0.1708	Bangladesh	T	SAE	XI-2	HOLDI GIRA::IRGC 31801-1
IRIS_313-10965	5057435	29635224	0.1707	Bangladesh	T	SAE	cA (Aus)	TILOKCHAN (SONABETHI)::IRGC 25927-1
IRIS_313-11324	5049446	29635224	0.1704	Bangladesh	T	SAE	cA (Aus)	KALABOKRI::IRGC 43872-1
IRIS_313-9397	5030540	29635224	0.1697	Bangladesh	P	SAE	XI-2	DUDHSWAR 15-141::IRGC 37951-1
IRIS_313-11217	5021602	29635224	0.1694	Bangladesh	P	SAE	cB (Bas)	LAL AMAN 207::IRGC 37754-1
IRIS_313-11206	5016496	29635224	0.1693	Bangladesh	T	SAE	XI-adm	KUMRI::IRGC 37182-2
IRIS_313-8717	5014062	29635224	0.1692	Bangladesh	T	SAE	XI-adm	BAZAIL::IRGC 27526-1
IRIS_313-12138	5007709	29635224	0.169	Bhutan	T	SAE	XI-adm	YADU BARA::IRGC 86912-1
IRIS_313-11225	4992919	29635224	0.1685	Bangladesh	P	SAE	XI-adm	SADAJIRA (DEEP STRAW) 16-194::IRGC 38251-2
IRIS_313-8733	4984161	29635224	0.1682	Bangladesh	T	SAE	XI-2	NOLOS::IRGC 77285-1
IRIS_313-11054	4980954	29635224	0.1681	Bangladesh	P	SAE	cA (Aus)	AUS 295::IRGC 29083-1
IRIS_313-8814	4936289	29635224	0.1666	Bhutan	T	SAE	cB (Bas)	SHANKA::IRGC 67848-1
IRIS_313-11204	4936568	29635224	0.1666	Bangladesh	T	SAE	XI-adm	KARTIKHAMA::IRGC 37149-2
IRIS_313-11016	4920443	29635224	0.166	Bangladesh	T	SAE	cA (Aus)	KACHILON::IRGC 27555-1
IRIS_313-12055	4915196	29635224	0.1659	Bangladesh	P	SAE	cA (Aus)	LAL MOTI::IRGC 82168-1
IRIS_313-9572	4914127	29635224	0.1658	Bhutan	T	SAE	XI-adm	ASU::IRGC 62154-1
IRIS_313-8349	4889435	29635224	0.165	Bangladesh	T	SAE	XI-2	LATA MONA::IRGC 49333-1
B176	4835559	29635224	0.1632	Bangladesh	I	SAE	XI-adm	BRC 25-146-2-1
IRIS_313-11055	4826495	29635224	0.1629	Bangladesh	P	SAE	cA (Aus)	AUS 299::IRGC 29087-1
IRIS_313-11321	4825541	29635224	0.1628	Bangladesh	T	SAE	XI-2	GANDHISAIL::IRGC 43826-2
IRIS_313-8410	4804334	29635224	0.1621	Bangladesh	T	SAE	cA (Aus)	JABOR SAIL::IRGC 66831-1
IRIS_313-11059	4800799	29635224	0.162	Bangladesh	P	SAE	cA (Aus)	AUS 344::IRGC 29131-1
IRIS_313-11051	4781576	29635224	0.1613	Bangladesh	P	SAE	cA (Aus)	AUS 242::IRGC 29040-1
IRIS_313-12141	4760857	29635224	0.1606	Bangladesh	T	SAE	cA (Aus)	HATEA::IRGC 86973-1
IRIS_313-11224	4752802	29635224	0.1604	Bangladesh	P	SAE	XI-2	PATNAI 31-679::IRGC 38149-2
IRIS_313-11056	4745969	29635224	0.1601	Bangladesh	P	SAE	cA (Aus)	AUS 301::IRGC 29089-1
IRIS_313-10980	4719482	29635224	0.1593	Bangladesh	T	SAE	admix	DUDHSAR::IRGC 26458-1
IRIS_313-11483	4712462	29635224	0.159	Bangladesh	T	SAE	cA (Aus)	BOTESHSHORE::IRGC 53484-1
IRIS_313-9594	4689284	29635224	0.1582	Bangladesh	T	SAE	XI-adm	ASHI BINNI::IRGC 77216-1
IRIS_313-11228	4677915	29635224	0.1578	Bangladesh	P	SAE	XI-2	SADAJIRA 19-339::IRGC 38361-2
IRIS_313-11057	4656445	29635224	0.1571	Bangladesh	P	SAE	cA (Aus)	AUS 308::IRGC 29096-1
IRIS_313-11068	4655287	29635224	0.1571	Bangladesh	P	SAE	cB (Bas)	PANKAIT 31::IRGC 29377-1
IRIS_313-11050	4630417	29635224	0.1562	Bangladesh	P	SAE	cA (Aus)	AUS 233::IRGC 29036-1
IRIS_313-11229	4619470	29635224	0.1559	Bangladesh	P	SAE	XI-2	STRAW 23-428::IRGC 38416-2
IRIS_313-11484	4614697	29635224	0.1557	Bangladesh	T	SAE	cA (Aus)	EJALI::IRGC 53500-1
IRIS_313-11048	4608493	29635224	0.1555	Bangladesh	P	SAE	cA (Aus)	AUS 171::IRGC 29004-1
IRIS_313-11205	4591251	29635224	0.1549	Bangladesh	T	SAE	XI-2	KAZALSAIL::IRGC 37161-2
IRIS_313-10605	4574344	29635224	0.1544	Bangladesh	P	SAE	cA (Aus)	DV 86::IRGC 8840-1
IRIS_313-9156	4567182	29635224	0.1541	Bangladesh	I	SAE	XI-2	DHOLA AMAN (LOWLAND AMAN)::IRGC 8341-1
IRIS_313-11069	4552199	29635224	0.1536	Bangladesh	P	SAE	cB (Bas)	TUPA 15-3::IRGC 29416-2
IRIS_313-11401	4532922	29635224	0.153	Bangladesh	T	SAE	cB (Bas)	MOTANGA::IRGC 49242-2
IRIS_313-11112	4473301	29635224	0.1509	Bangladesh	T	SAE	cA (Aus)	HIJOL DIGA::IRGC 31655-1
IRIS_313-8864	4444852	29635224	0.15	Bangladesh	T	SAE	cA (Aus)	NOROI::IRGC 31611-1
IRIS_313-8930	4444789	29635224	0.15	Bangladesh	T	SAE	XI-1B	MUKKALA BAZAL::IRGC 77279-1
IRIS_313-9262	4445459	29635224	0.15	Bangladesh	T	SAE	XI-2	JHODI BIRUN::IRGC 31812-1
IRIS_313-11053	4432298	29635224	0.1496	Bangladesh	P	SAE	cA (Aus)	AUS 282::IRGC 29072-1
IRIS_313-11241	4418106	29635224	0.1491	Bangladesh	I	SAE	XI-2	BR 116-3B-53::IRGC 39559-2
IRIS_313-11064	4411055	29635224	0.1488	Bangladesh	P	SAE	cA (Aus)	BORO 275::IRGC 29294-2
IRIS_313-10986	4398837	29635224	0.1484	Bangladesh	T	SAE	XI-2	HALDI JAON::IRGC 26638-2
IRIS_313-8641	4391035	29635224	0.1482	Bangladesh	P	SAE	cA (Aus)	AUS 439::IRGC 29221-1
IRIS_313-11945	4388773	29635224	0.1481	Bangladesh	T	SAE	XI-2	MALIKULI::IRGC 76237-1
IRIS_313-11058	4382736	29635224	0.1479	Bangladesh	P	SAE	cA (Aus)	AUS 329::IRGC 29116-1
IRIS_313-9067	4365665	29635224	0.1473	Bangladesh	T	SAE	XI-2	BHOJON KOLPO::IRGC 31727-1
IRIS_313-11047	4330974	29635224	0.1461	Bangladesh	P	SAE	cA (Aus)	AUS 84::IRGC 28947-2
IRIS_313-11743	4320734	29635224	0.1458	Bhutan	T	SAE	cB (Bas)	CHHOTI MASHINO::IRGC 67830-1
IRIS_313-9170	4317405	29635224	0.1457	Bangladesh	P	SAE	cB (Bas)	TK DEEP STRAW 34-786::IRGC 38522-1
IRIS_313-9148	4296425	29635224	0.145	Bangladesh	P	SAE	XI-2	BADAL 1163::IRGC 32796-1
IRIS_313-10603	4257294	29635224	0.1437	Bangladesh	P	SAE	cA (Aus)	UCP 122::IRGC 8794-1
IRIS_313-9682	4255878	29635224	0.1436	Bangladesh	P	SAE	cB (Bas)	TK RED 35-799::IRGC 38535-1
IRIS_313-10975	4229228	29635224	0.1427	Bangladesh	T	SAE	XI-2	KOLA MUCHI::IRGC 26384-2
IRIS_313-11113	4210142	29635224	0.1421	Bangladesh	T	SAE	XI-2	KAL SHULI::IRGC 31665-2
IRIS_313-8765	4139778	29635224	0.1397	Bhutan	T	SAE	cB (Bas)	TIMMURAY::IRGC 67857-1
IRIS_313-8703	4102930	29635224	0.1384	Bangladesh	P	SAE	XI-2	DA 7::IRGC 5809-2
IRIS_313-11218	4101386	29635224	0.1384	Bangladesh	P	SAE	cB (Bas)	BADSHABHOG 4-60::IRGC 37793-2
IRIS_313-11052	4095116	29635224	0.1382	Bangladesh	P	SAE	cA (Aus)	AUS 278::IRGC 29068-1
IRIS_313-9404	4062909	29635224	0.1371	Bhutan	T	SAE	admix	YANGKUM (RED)::IRGC 32406-1
IRIS_313-11223	4053564	29635224	0.1368	Bangladesh	P	SAE	cB (Bas)	OVAL RED 29 B 601::IRGC 38130-2
IRIS_313-11062	3988543	29635224	0.1346	Bangladesh	P	SAE	cB (Bas)	BEGUNBICHI 33::IRGC 29260-1
IRIS_313-9506	3888744	29635224	0.1312	Bhutan	T	SAE	admix	TIMA::IRGC 67856-1
IRIS_313-11722	3794999	29635224	0.1281	Bangladesh	T	SAE	XI-adm	KABERI::IRGC 66801-1
IRIS_313-11690	3702174	29635224	0.1249	Bhutan	T	SAE	admix	KOCHUM::IRGC 64906-1
IRIS_313-9066	3497685	29635224	0.118	Bangladesh	P	SAE	XI-1B	AUS 177::IRGC 29009-1
IRIS_313-12094	3350910	29635224	0.1131	Bangladesh	T	SAE	cB (Bas)	KASHA::IRGC 83865-1
IRIS_313-11066	3315855	29635224	0.1119	Bangladesh	P	SAE	admix	GASMAL 339::IRGC 29333-1
IRIS_313-8302	3267441	29635224	0.1103	Bhutan	T	SAE	admix	KAMJA::IRGC 62171-1
IRIS_313-8637	3252929	29635224	0.1098	Bhutan	T	SAE	GJ-sbtrp	BALINGMI::IRGC 62156-1
IRIS_313-8519	3222387	29635224	0.1087	Bhutan	T	SAE	GJ-sbtrp	MANDASHERPO::IRGC 64913-1
IRIS_313-8486	3191360	29635224	0.1077	Bhutan	T	SAE	GJ-sbtrp	DAGPA MRAS::IRGC 62166-1
IRIS_313-9529	3107836	29635224	0.1049	Bhutan	T	SAE	GJ-sbtrp	DAGPA BARA::IRGC 64887-1
IRIS_313-9048	2993433	29635224	0.101	Bhutan	T	SAE	GJ-sbtrp	TSCHINANANGKA::IRGC 64935-1
IRIS_313-8857	2926279	29635224	0.09874	Bhutan	T	SAE	GJ-sbtrp	KAMNAM::IRGC 64902-1
IRIS_313-8815	2815867	29635224	0.09502	Bhutan	T	SAE	GJ-sbtrp	JANA (NAM)::IRGC 64897-1
IRIS_313-11691	2393886	29635224	0.08078	Bhutan	T	SAE	GJ-sbtrp	SHANGYIPA::IRGC 64928-1
IRIS_313-11661	1337379	29635224	0.04513	Bhutan	T	SAE	GJ-tmp	91-382::IRGC 63464-1
IRIS_313-8655	6267792	29635224	0.2115	Pakistan	T	SAW	cA (Aus)	TAK::IRGC 73124-1
CX46	6226215	29635224	0.2101	Pakistan	T	SAW	admix	Pusa (Basmati 1)
IRIS_313-10549	5846045	29635224	0.1973	Pakistan	inc	SAW	cA (Aus)	RATUA 81::IRGC 6829-1
IRIS_313-8398	5812540	29635224	0.1961	Pakistan	T	SAW	cA (Aus)	KHARSU 80::IRGC 28016-1
IRIS_313-11025	5791462	29635224	0.1954	Pakistan	T	SAW	cA (Aus)	DHAN 263::IRGC 27926-2
IRIS_313-8390	5782014	29635224	0.1951	Pakistan	T	SAW	cA (Aus)	SUFAID 246::IRGC 28303-1
IRIS_313-9283	5712081	29635224	0.1927	Pakistan	T	SAW	cA (Aus)	TAK SUFAID::IRGC 73127-1
IRIS_313-11029	5698576	29635224	0.1923	Pakistan	T	SAW	cA (Aus)	MUSHKAN 340 A::IRGC 28073-1
IRIS_313-11888	5694966	29635224	0.1922	Pakistan	T	SAW	cA (Aus)	KANGRI::IRGC 73104-1
IRIS_313-9695	5595156	29635224	0.1888	Pakistan	T	SAW	cA (Aus)	SOLAY GHAT::IRGC 73121-1
IRIS_313-11028	5583716	29635224	0.1884	Pakistan	inc	SAW	cA (Aus)	MOTIA::IRGC 28036-1
IRIS_313-9601	5551662	29635224	0.1873	Pakistan	T	SAW	cB (Bas)	CHAWAL::IRGC 73090-1
IRIS_313-11889	5498218	29635224	0.1855	Pakistan	T	SAW	XI-adm	MURGI BRINJ::IRGC 73109-1
IRIS_313-11020	5301764	29635224	0.1789	Pakistan	T	SAW	cA (Aus)	BAMLA SUFFAID 320::IRGC 27776-1
IRIS_313-12079	5011543	29635224	0.1691	Pakistan	I	SAW	XI-3	KASHMIRI::IRGC 83002-1
IRIS_313-11031	4914438	29635224	0.1658	Pakistan	T	SAW	cA (Aus)	NAWAN SATHRA BAGAR 344::IRGC 28079-1
IRIS_313-11034	4870304	29635224	0.1643	Pakistan	inc	SAW	cA (Aus)	SANTHI 206::IRGC 28215-1
IRIS_313-11036	4867921	29635224	0.1643	Pakistan	T	SAW	cA (Aus)	34::IRGC 28371-2
IRIS_313-9783	4791998	29635224	0.1617	Afghanistan	T	SAW	admix	BERENJ 1277 S::IRGC 3461-1
IRIS_313-11022	4663723	29635224	0.1574	Pakistan	T	SAW	cB (Bas)	BASMATI SUFAID 100::IRGC 27791-3
IRIS_313-11024	4649845	29635224	0.1569	Pakistan	T	SAW	cA (Aus)	BEGMI 135::IRGC 27845-1
IRIS_313-11023	4574367	29635224	0.1544	Pakistan	T	SAW	cB (Bas)	BASMATI SURKH 161::IRGC 27797-1
CX72	4555802	29635224	0.1537	Pakistan	I	SAW	cB (Bas)	Basmati 385
IRIS_313-11027	4531362	29635224	0.1529	Pakistan	T	SAW	cA (Aus)	JHONA 101::IRGC 27976-1
IRIS_313-8656	4525819	29635224	0.1527	Pakistan	T	SAW	cB (Bas)	BASMATI 1::IRGC 27798-1
IRIS_313-11035	4524119	29635224	0.1527	Pakistan	inc	SAW	admix	ZIRA SHAHI::IRGC 28327-1
IRIS_313-11026	4518787	29635224	0.1525	Pakistan	T	SAW	cB (Bas)	HANSRAJ::IRGC 27936-2
IRIS_313-11037	4493760	29635224	0.1516	Pakistan	T	SAW	cA (Aus)	421::IRGC 28458-1
IRIS_313-9449	4440971	29635224	0.1499	Pakistan	T	SAW	cA (Aus)	JAMBALI::IRGC 73101-1
IRIS_313-11032	4325933	29635224	0.146	Pakistan	T	SAW	cB (Bas)	PALAM PURI BAS 137::IRGC 28084-1
IRIS_313-11021	4272610	29635224	0.1442	Pakistan	inc	SAW	cB (Bas)	BARA PASHAWARI 390::IRGC 27779-1
IRIS_313-11030	4068930	29635224	0.1373	Pakistan	T	SAW	cB (Bas)	MUTANT 12-42::IRGC 28076-1
IRIS_313-10295	3492932	29635224	0.1179	Pakistan	inc	SAW	admix	PDR 34-2-1-2::IRGC 117020-1
IRIS_313-11033	2826678	29635224	0.09538	Pakistan	inc	SAW	admix	RATRIO::IRGC 28181-1
CX74	2052372	29635224	0.06925	Pakistan	P	SAW	GJ-tmp	JP-5
IRIS_313-11829	1468312	29635224	0.04955	Pakistan	T	SAW	GJ-tmp	MUNJI::IRGC 70928-1
IRIS_313-9575	7916370	29635224	0.2671	Thailand	T	SEA	XI-3	MAE YEU::IRGC 64509-1
B185	7440863	29635224	0.2511	Lao People's Democratic Republic	inc	SEA	XI-adm	SLK 2-18-2
IRIS_313-11130	7358209	29635224	0.2483	Myanmar	P	SEA	XI-adm	HTAWPATT::IRGC 33125-2
IRIS_313-8895	7157267	29635224	0.2415	Thailand	T	SEA	XI-3	LEUANG DAM::IRGC 78267-1
IRIS_313-8793	6984748	29635224	0.2357	Myanmar	inc	SEA	XI-3	KHAO THI RATE::IRGC 58041-1
IRIS_313-11144	6951823	29635224	0.2346	Myanmar	P	SEA	XI-adm	TAUNGDI::IRGC 33746-2
IRIS_313-11119	6889680	29635224	0.2325	Viet Nam	T	SEA	XI-adm	NEP BUNG::IRGC 32207-1
IRIS_313-11139	6870040	29635224	0.2318	Myanmar	P	SEA	XI-adm	NWACHI MANINE::IRGC 33531-2
IRIS_313-8474	6855477	29635224	0.2313	Thailand	T	SEA	XI-3	PAH WEAN::IRGC 78276-1
IRIS_313-11608	6754198	29635224	0.2279	Thailand	T	SEA	XI-3	KHAO BAWNG::IRGC 61260-1
IRIS_313-11610	6727611	29635224	0.227	Thailand	T	SEA	XI-3	WUA PAN LAK::IRGC 61357-1
IRIS_313-12148	6664368	29635224	0.2249	Cambodia	T	SEA	XI-3	ARN'-SAR THNGORN'::IRGC 87205-1
IRIS_313-11138	6597588	29635224	0.2226	Myanmar	P	SEA	XI-3	NGASEIN THEEDAT (C 30)::IRGC 33504-2
IRIS_313-11090	6564274	29635224	0.2215	Lao People's Democratic Republic	T	SEA	XI-3	KEO LAI::IRGC 29969-2
IRIS_313-11091	6552286	29635224	0.2211	Lao People's Democratic Republic	T	SEA	XI-adm	KHAO NON::IRGC 30051-1
IRIS_313-10575	6519005	29635224	0.22	Myanmar	inc	SEA	XI-adm	KAYANGYA D 402::IRGC 7927-2
IRIS_313-11086	6518430	29635224	0.22	Lao People's Democratic Republic	inc	SEA	XI-3	KHAO THAMA::IRGC 29838-2
IRIS_313-12194	6490778	29635224	0.219	Lao People's Democratic Republic	T	SEA	XI-3	EA POUAK::IRGC 89748-1
IRIS_313-11088	6451198	29635224	0.2177	Cambodia	inc	SEA	XI-3	SRAU KHSAI::IRGC 29896-2
IRIS_313-10901	6395395	29635224	0.2158	Cambodia	T	SEA	XI-3	DAMNOEUB THPOIL HING::IRGC 22856-2
IRIS_313-12102	6333127	29635224	0.2137	Cambodia	T	SEA	XI-3	SOK SOV::IRGC 83966-1
IRIS_313-8674	6330700	29635224	0.2136	Thailand	T	SEA	XI-3	HAWM KRUA::IRGC 64333-1
IRIS_313-11838	6318814	29635224	0.2132	Thailand	T	SEA	XI-3	LEUM DERN::IRGC 71288-1
CX87	6306265	29635224	0.2128	Viet Nam	P	SEA	XI-adm	Q 5
IRIS_313-10907	6258468	29635224	0.2112	Cambodia	T	SEA	XI-3	MARECH S V R::IRGC 23011-2
IRIS_313-8253	6249058	29635224	0.2109	Thailand	T	SEA	XI-3	KHAO DAWK MALI 105::IRGC 27748-2
IRIS_313-8409	6230459	29635224	0.2102	Viet Nam	T	SEA	XI-adm	SOM NGHE AN::IRGC 60751-1
IRIS_313-11145	6228937	29635224	0.2102	Myanmar	inc	SEA	XI-3	THAKADE THEEDAT::IRGC 33772-2
IRIS_313-11150	6203402	29635224	0.2093	Myanmar	inc	SEA	XI-3	ZEINGYI::IRGC 33923-2
IRIS_313-10903	6198598	29635224	0.2092	Cambodia	T	SEA	XI-3	KHSAY VENG::IRGC 22915-3
IRIS_313-11193	6186742	29635224	0.2088	Thailand	inc	SEA	XI-3	GAHB AWY 2-1::IRGC 36549-2
B184	6177514	29635224	0.2085	Viet Nam	T	SEA	XI-adm	CHANH 148
IRIS_313-10506	6172789	29635224	0.2083	Thailand	inc	SEA	XI-3	PARN A 191::IRGC 4932-1
IRIS_313-11082	6154688	29635224	0.2077	Lao People's Democratic Republic	T	SEA	XI-3	EA DAM HANG DOK::IRGC 29698-2
IRIS_313-11084	6147157	29635224	0.2074	Cambodia	inc	SEA	XI-3	KABIN::IRGC 29752-1
IRIS_313-11096	6111665	29635224	0.2062	Viet Nam	T	SEA	XI-3	CADUNG SO BLOC 1::IRGC 30231-3
CX37	6105737	29635224	0.206	Viet Nam	P	SEA	XI-1B	OM 997
IRIS_313-11131	6100075	29635224	0.2058	Myanmar	P	SEA	XI-adm	KALAI::IRGC 33151-2
CX86	6086487	29635224	0.2054	Viet Nam	P	SEA	XI-adm	C 70
IRIS_313-11148	6086417	29635224	0.2054	Myanmar	P	SEA	XI-3	YEBAW::IRGC 33875-2
IRIS_313-11142	6062071	29635224	0.2046	Myanmar	P	SEA	XI-3	SHWEPULAY::IRGC 33696-2
IRIS_313-11534	6032743	29635224	0.2036	Thailand	T	SEA	XI-3	NAHNG KHAO BOW::IRGC 57377-1
IRIS_313-11147	6002547	29635224	0.2025	Myanmar	P	SEA	XI-adm	TYB 11::IRGC 33821-2
IRIS_313-10899	5934621	29635224	0.2003	Cambodia	T	SEA	XI-3	DAMNOEUB KHSE SAUT::IRGC 22819-2
IRIS_313-11149	5937369	29635224	0.2003	Myanmar	P	SEA	XI-3	YODAYA::IRGC 33901-2
IRIS_313-10906	5931165	29635224	0.2001	Cambodia	T	SEA	XI-3	LUA NEP 4416::IRGC 23006-1
IRIS_313-11146	5929930	29635224	0.2001	Myanmar	P	SEA	XI-adm	THEEDAT NGASEIN::IRGC 33779-2
IRIS_313-11839	5924696	29635224	0.1999	Thailand	T	SEA	XI-3	MUAY::IRGC 71318-1
IRIS_313-11545	5894066	29635224	0.1989	Myanmar	inc	SEA	XI-adm	MOE GAUNG PYU::IRGC 58120-1
IRIS_313-11997	5893973	29635224	0.1989	Cambodia	T	SEA	XI-3	BARUM::IRGC 79108-1
IRIS_313-10911	5891452	29635224	0.1988	Cambodia	inc	SEA	XI-3	NEANG NARY::IRGC 23084-1
IRIS_313-11080	5887187	29635224	0.1987	Lao People's Democratic Republic	T	SEA	XI-3	PHAE MEUN LAN::IRGC 29660-1
IRIS_313-8679	5885662	29635224	0.1986	Thailand	T	SEA	XI-3	JAO LEUANG::IRGC 65866-1
IRIS_313-12188	5887026	29635224	0.1986	Lao People's Democratic Republic	inc	SEA	XI-3	CHAO DO::IRGC 89430-1
IRIS_313-11071	5883134	29635224	0.1985	Lao People's Democratic Republic	T	SEA	XI-adm	CHAO HAI::IRGC 29450-2
IRIS_313-11254	5864698	29635224	0.1979	Viet Nam	inc	SEA	XI-3	TIEN SOM::IRGC 40759-2
IRIS_313-10908	5858677	29635224	0.1977	Cambodia	T	SEA	XI-3	MOROM::IRGC 23016-2
IRIS_313-11087	5853591	29635224	0.1975	Cambodia	inc	SEA	XI-3	PONG SANG A::IRGC 29881-2
IRIS_313-11141	5843639	29635224	0.1972	Myanmar	P	SEA	XI-adm	SHWENI::IRGC 33686-2
IRIS_313-9285	5835233	29635224	0.1969	Myanmar	inc	SEA	XI-adm	PALEPYU::IRGC 33549-1
IRIS_313-11549	5828486	29635224	0.1967	Myanmar	inc	SEA	XI-adm	TAUNGYA SABA::IRGC 58226-1
IRIS_313-10910	5820263	29635224	0.1964	Cambodia	T	SEA	XI-3	NEANG MAC::IRGC 23071-3
IRIS_313-11535	5804354	29635224	0.1959	Thailand	inc	SEA	XI-3	PAH DI MI RAHK::IRGC 57398-1
IRIS_313-9209	5801260	29635224	0.1958	Thailand	T	SEA	XI-3	LEUANG LAI MAE PRAJAN::IRGC 71279-1
IRIS_313-10898	5794699	29635224	0.1955	Cambodia	T	SEA	XI-3	ANG KANG K P::IRGC 22716-2
CX31	5782625	29635224	0.1951	Myanmar	P	SEA	XI-1B	Hnankar
IRIS_313-10904	5778693	29635224	0.195	Cambodia	T	SEA	XI-3	KREM KRAHAM::IRGC 22981-2
IRIS_313-11137	5773235	29635224	0.1948	Myanmar	inc	SEA	XI-adm	NGALONGYI::IRGC 33479-2
IRIS_313-11133	5763662	29635224	0.1945	Myanmar	inc	SEA	XI-3	LWANKHAN::IRGC 33330-1
CX33	5745912	29635224	0.1939	Myanmar	P	SEA	XI-1B	Shwe Thwe Yin Hyv
IRIS_313-9115	5743273	29635224	0.1938	Thailand	P	SEA	XI-3	LEUANG YAI 29-12-2::IRGC 881-1
IRIS_313-11544	5717407	29635224	0.1929	Myanmar	inc	SEA	XI-adm	LINPAN CHAW::IRGC 58087-1
IRIS_313-11992	5716094	29635224	0.1929	Lao People's Democratic Republic	T	SEA	XI-3	CHAO LAO SOUNG::IRGC 78799-1
IRIS_313-11126	5708722	29635224	0.1926	Myanmar	P	SEA	XI-adm	ANBAW::IRGC 32932-2
IRIS_313-11128	5693870	29635224	0.1921	Myanmar	inc	SEA	XI-adm	GOKAUNG::IRGC 33079-2
IRIS_313-10934	5680241	29635224	0.1917	Thailand	inc	SEA	XI-3	PAH PIANG::IRGC 24452-2
IRIS_313-11134	5667873	29635224	0.1913	Myanmar	inc	SEA	XI-adm	MANSAT 3::IRGC 33341-3
IRIS_313-11140	5668395	29635224	0.1913	Myanmar	P	SEA	XI-3	PADAN::IRGC 33544-2
CX144	5654199	29635224	0.1908	Thailand	P	SEA	XI-adm	Hta 7204
IRIS_313-8485	5650666	29635224	0.1907	Thailand	T	SEA	XI-3	NAM SA GUI 19::IRGC 11462-1
IRIS_313-8722	5644096	29635224	0.1905	Thailand	T	SEA	XI-3	HAWM TOONG::IRGC 48007-1
CX83	5639766	29635224	0.1903	Viet Nam	P	SEA	XI-1B	X 22
IRIS_313-11393	5639683	29635224	0.1903	Thailand	T	SEA	XI-3	SAWNG RUANG::IRGC 48458-2
IRIS_313-11074	5631255	29635224	0.19	Lao People's Democratic Republic	T	SEA	XI-3	KHAO MAK KHAM::IRGC 29533-1
B219	5621404	29635224	0.1897	Lao People's Democratic Republic	T	SEA	XI-adm	Haolai
IRIS_313-9119	5618347	29635224	0.1896	Thailand	inc	SEA	XI-3	LEUANG YAI 29-12-46::IRGC 24397-1
IRIS_313-10680	5618036	29635224	0.1896	Lao People's Democratic Republic	T	SEA	XI-3	MAK NAM::IRGC 12940-2
IRIS_313-11327	5619234	29635224	0.1896	Thailand	T	SEA	XI-3	JAO' HAWN MAE JAN::IRGC 44022-2
IRIS_313-8980	5609120	29635224	0.1893	Thailand	T	SEA	XI-3	E DAW HAWM::IRGC 47938-1
IRIS_313-11594	5609335	29635224	0.1893	Viet Nam	T	SEA	XI-adm	CHAN THANH HOA::IRGC 60647-1
IRIS_313-12222	5607801	29635224	0.1892	Lao People's Democratic Republic	T	SEA	XI-3	LAM BOUN::IRGC 91525-1
IRIS_313-10750	5599881	29635224	0.189	Viet Nam	T	SEA	XI-3	TRANG LUA::IRGC 16781-3
IRIS_313-11410	5601057	29635224	0.189	Myanmar	P	SEA	XI-adm	C 28-16::IRGC 49580-1
IRIS_313-11509	5593127	29635224	0.1887	Thailand	T	SEA	XI-3	PRADOO DAENG::IRGC 55265-1
IRIS_313-10905	5589848	29635224	0.1886	Cambodia	T	SEA	XI-3	KUOL DAUN THNONG::IRGC 22986-1
IRIS_313-11192	5585046	29635224	0.1885	Thailand	I	SEA	XI-3	BKN 7130-1017-2::IRGC 36531-2
IRIS_313-11548	5586050	29635224	0.1885	Myanmar	inc	SEA	XI-adm	TAUNG LWIN::IRGC 58222-1
IRIS_313-11384	5571219	29635224	0.188	Viet Nam	T	SEA	XI-adm	CHIEM TONG NHAT 1::IRGC 47496-1
IRIS_313-11387	5565435	29635224	0.1878	Thailand	T	SEA	XI-3	SAHM RUANG NAK::IRGC 47818-1
IRIS_313-12152	5565523	29635224	0.1878	Cambodia	T	SEA	XI-3	DAMM NOEB THNGORN'::IRGC 87428-1
IRIS_313-9281	5562635	29635224	0.1877	Thailand	T	SEA	XI-3	KHAO KAI::IRGC 78251-1
IRIS_313-11135	5558255	29635224	0.1876	Myanmar	P	SEA	XI-3	MAUNG NYO::IRGC 33351-2
IRIS_313-11143	5557563	29635224	0.1875	Myanmar	inc	SEA	XI-adm	TANBAUNG::IRGC 33732-2
IRIS_313-12042	5554305	29635224	0.1874	Cambodia	T	SEA	XI-3	PHCAR KABAS::IRGC 81357-1
IRIS_313-10555	5543074	29635224	0.187	Viet Nam	inc	SEA	XI-3	LUA HUONG T 1::IRGC 7082-2
IRIS_313-11507	5541850	29635224	0.187	Viet Nam	I	SEA	XI-1B	TV 30::IRGC 55221-1
CX131	5534005	29635224	0.1867	Myanmar	I	SEA	XI-1A	ZALE
IRIS_313-12210	5532356	29635224	0.1867	Viet Nam	T	SEA	XI-adm	CHAM TON::IRGC 90600-1
IRIS_313-12043	5522001	29635224	0.1863	Cambodia	T	SEA	XI-3	SAMBOK ANGKRANG::IRGC 81375-1
IRIS_313-12207	5521489	29635224	0.1863	Lao People's Democratic Republic	T	SEA	XI-adm	SALA::IRGC 90457-1
IRIS_313-8870	5497382	29635224	0.1855	Thailand	T	SEA	XI-3	KHAO PLAH LAI NAK::IRGC 65941-1
CX84	5493348	29635224	0.1854	Viet Nam	P	SEA	XI-adm	X 23
IRIS_313-11543	5493232	29635224	0.1854	Myanmar	inc	SEA	XI-3	KYUN TAW SEIN::IRGC 58072-1
IRIS_313-12185	5491291	29635224	0.1853	Lao People's Democratic Republic	inc	SEA	XI-adm	AE NOUA::IRGC 89308-1
IRIS_313-12329	5484692	29635224	0.1851	Lao People's Democratic Republic	T	SEA	XI-adm	CHAO DO::IRGC 106666-1
IRIS_313-8732	5481167	29635224	0.185	Thailand	T	SEA	XI-1B	WP 36::IRGC 55278-1
IRIS_313-11078	5481774	29635224	0.185	Lao People's Democratic Republic	T	SEA	XI-adm	NON HAI::IRGC 29636-2
IRIS_313-11818	5482795	29635224	0.185	Myanmar	T	SEA	XI-adm	LETYONE::IRGC 70753-1
IRIS_313-11072	5476831	29635224	0.1848	Lao People's Democratic Republic	T	SEA	XI-3	CHAO LEP NOK::IRGC 29451-2
IRIS_313-10556	5473812	29635224	0.1847	Viet Nam	inc	SEA	XI-3	LUA DEN MUA::IRGC 7185-3
IRIS_313-11233	5474642	29635224	0.1847	Thailand	P	SEA	XI-1B	SPR 7284-57-5::IRGC 38649-1
IRIS_313-11609	5472363	29635224	0.1847	Thailand	T	SEA	XI-3	MAE HAWM::IRGC 61283-1
IRIS_313-11508	5469448	29635224	0.1846	Thailand	T	SEA	XI-3	PAWNG AEW 1::IRGC 55263-1
IRIS_313-9032	5462863	29635224	0.1843	Thailand	inc	SEA	XI-1B	KHAO GRADOOK CHAHNG::IRGC 17111-1
IRIS_313-10554	5461731	29635224	0.1843	Viet Nam	inc	SEA	XI-3	BONG SEN::IRGC 7011-1
IRIS_313-11541	5456351	29635224	0.1841	Myanmar	inc	SEA	XI-adm	HOE PHAR THAE::IRGC 57907-1
IRIS_313-11896	5455255	29635224	0.1841	Viet Nam	T	SEA	XI-3	CA HIM::IRGC 73246-1
IRIS_313-12193	5447004	29635224	0.1838	Lao People's Democratic Republic	T	SEA	XI-3	DO NOUAN::IRGC 89648-1
IRIS_313-12186	5445186	29635224	0.1837	Lao People's Democratic Republic	inc	SEA	XI-adm	BAO DAM::IRGC 89352-1
IRIS_313-8996	5435531	29635224	0.1834	Viet Nam	T	SEA	XI-3	SRAU SENG::IRGC 30290-1
IRIS_313-11901	5432894	29635224	0.1833	Thailand	inc	SEA	XI-3	TI NGI::IRGC 73620-1
CX388	5429365	29635224	0.1832	Thailand	P	SEA	XI-1B	KR 200
IRIS_313-11542	5421025	29635224	0.1829	Myanmar	inc	SEA	admix	KHAO KUM PAR::IRGC 57966-1
IRIS_313-11076	5416192	29635224	0.1828	Lao People's Democratic Republic	T	SEA	XI-3	LAI NOK KHA::IRGC 29604-2
IRIS_313-11392	5406478	29635224	0.1824	Thailand	T	SEA	XI-3	SA MER::IRGC 48454-2
IRIS_313-12269	5404353	29635224	0.1824	Myanmar	T	SEA	XI-adm	SHWEWARHNAN::IRGC 96053-1
IRIS_313-12096	5401790	29635224	0.1823	Cambodia	T	SEA	XI-3	NEANG CHEK::IRGC 83894-1
IRIS_313-10151	5400155	29635224	0.1822	Thailand	I	SEA	XI-3	RD 15::IRGC 47705-1
IRIS_313-12229	5400035	29635224	0.1822	Lao People's Democratic Republic	T	SEA	XI-3	TAM::IRGC 92253-1
IRIS_313-12286	5396272	29635224	0.1821	Myanmar	T	SEA	XI-3	EKAYIN SAW::IRGC 97468-2
IRIS_313-8785	5390950	29635224	0.1819	Thailand	T	SEA	XI-3	LEUANG AWN::IRGC 48257-1
IRIS_313-11993	5389939	29635224	0.1819	Myanmar	T	SEA	XI-adm	LIM MA NO MA KHIN NYUNT::IRGC 78917-1
IRIS_313-10557	5386178	29635224	0.1817	Cambodia	inc	SEA	XI-3	KONG MARETH 4 T 1::IRGC 7248-3
IRIS_313-9342	5374022	29635224	0.1813	Viet Nam	T	SEA	XI-3	LUA CHAN HUONG::IRGC 16800-1
IRIS_313-9317	5370366	29635224	0.1812	Viet Nam	T	SEA	XI-adm	VEN THAP::IRGC 56138-1
IRIS_313-10921	5369444	29635224	0.1812	Lao People's Democratic Republic	inc	SEA	XI-adm	KHAO PHAE HOM::IRGC 23518-2
CX80	5361156	29635224	0.1809	Viet Nam	P	SEA	XI-1B	OM 1706
IRIS_313-12309	5362167	29635224	0.1809	Lao People's Democratic Republic	T	SEA	XI-3	SANPATONG NYAY::IRGC 99050-1
IRIS_313-12143	5355685	29635224	0.1807	Cambodia	T	SEA	XI-3	SRAU KHGNAERNG::IRGC 87073-1
IRIS_313-10909	5352793	29635224	0.1806	Cambodia	inc	SEA	XI-3	NEANG CHAN::IRGC 23034-3
IRIS_313-11406	5351582	29635224	0.1806	Myanmar	inc	SEA	XI-3	A 28-6::IRGC 49409-2
IRIS_313-9302	5347172	29635224	0.1804	Thailand	I	SEA	XI-3	GAM PAI 30-12-15::IRGC 831-1
IRIS_313-11898	5346290	29635224	0.1804	Thailand	inc	SEA	XI-3	MA YOO::IRGC 73507-1
IRIS_313-9227	5339942	29635224	0.1802	Thailand	P	SEA	XI-1B	WP 65::IRGC 36526-1
IRIS_313-12354	5338458	29635224	0.1801	Lao People's Democratic Republic	T	SEA	XI-adm	NASAENG::IRGC 107818-1
IRIS_313-12247	5325832	29635224	0.1797	Cambodia	inc	SEA	XI-3	DAMNOEUB KRAMOUM::IRGC 94084-2
IRIS_313-10913	5321041	29635224	0.1796	Cambodia	T	SEA	XI-3	PHAT PRORMOL::IRGC 23143-1
IRIS_313-11405	5312501	29635224	0.1793	Myanmar	inc	SEA	XI-3	APYO DAW GYI::IRGC 49386-2
IRIS_313-11546	5310102	29635224	0.1792	Myanmar	inc	SEA	XI-adm	NGA CHAN HMWE::IRGC 58146-1
IRIS_313-11843	5311150	29635224	0.1792	Thailand	T	SEA	XI-3	PAN DAWK MAHK::IRGC 71380-1
IRIS_313-12161	5310026	29635224	0.1792	Cambodia	T	SEA	XI-3	PA PHA EA::IRGC 87751-1
IRIS_313-10749	5308688	29635224	0.1791	Viet Nam	T	SEA	XI-3	MINH SOC (CAMBODIA)::IRGC 16731-2
IRIS_313-12050	5306842	29635224	0.1791	Myanmar	T	SEA	XI-adm	SHAN KAUK HNYIN::IRGC 81656-1
IRIS_313-12270	5306266	29635224	0.1791	Myanmar	T	SEA	XI-adm	TOAM JUM::IRGC 96077-1
IRIS_313-12301	5300264	29635224	0.1789	Lao People's Democratic Republic	T	SEA	XI-adm	LG 10178::IRGC 98526-1
IRIS_313-9415	5278246	29635224	0.1781	Thailand	T	SEA	XI-3	PAHK NOK GAEW::IRGC 64572-1
IRIS_313-9567	5278248	29635224	0.1781	Thailand	inc	SEA	XI-3	KHAO CHUAN CHOM 452::IRGC 36571-1
IRIS_313-10902	5277608	29635224	0.1781	Cambodia	inc	SEA	XI-3	KAMPING POUY::IRGC 22876-2
IRIS_313-11837	5276514	29635224	0.178	Thailand	T	SEA	XI-3	KHAO NAHNG PRUNG::IRGC 71220-1
IRIS_313-12039	5275202	29635224	0.178	Cambodia	T	SEA	XI-3	NEANG AN::IRGC 81315-1
IRIS_313-10757	5272772	29635224	0.1779	Thailand	inc	SEA	XI-3	PEUAK NAM 43::IRGC 17129-1
IRIS_313-9006	5264865	29635224	0.1777	Thailand	T	SEA	XI-3	LONG KHI KRAI::IRGC 64490-1
IRIS_313-10928	5263612	29635224	0.1776	Thailand	T	SEA	XI-3	KHAO' SIM::IRGC 24094-1
IRIS_313-11893	5263243	29635224	0.1776	Viet Nam	T	SEA	XI-adm	KHAU DANH::IRGC 73201-1
IRIS_313-12288	5263204	29635224	0.1776	Myanmar	T	SEA	XI-3	NGWE TOE KYE::IRGC 97530-1
IRIS_313-7778	5253642	29635224	0.1773	Viet Nam	inc	SEA	XI-adm	SOM CAU 70 A::IRGC 8227-C1
IRIS_313-11389	5251177	29635224	0.1772	Thailand	T	SEA	XI-3	LEUANG PRA TAHN::IRGC 48292-2
IRIS_313-10648	5247379	29635224	0.1771	Cambodia	inc	SEA	XI-3	PREAH SIHANOUK::IRGC 11328-2
IRIS_313-11136	5249582	29635224	0.1771	Myanmar	inc	SEA	admix	NGAKWE THETYIN::IRGC 33477-2
IRIS_313-12308	5248178	29635224	0.1771	Lao People's Democratic Republic	T	SEA	XI-3	SAM SI::IRGC 99020-1
IRIS_313-11894	5245301	29635224	0.177	Viet Nam	T	SEA	XI-adm	LOC TRANG MUON::IRGC 73216-1
IRIS_313-12078	5243049	29635224	0.1769	Viet Nam	inc	SEA	XI-adm	DAU NGHA THAI BINH::IRGC 82891-1
IRIS_313-11844	5239655	29635224	0.1768	Thailand	T	SEA	XI-3	PUEY TAW::IRGC 71405-1
IRIS_313-11991	5239564	29635224	0.1768	Lao People's Democratic Republic	T	SEA	XI-3	CHON::IRGC 78776-1
IRIS_313-12246	5226881	29635224	0.1764	Cambodia	inc	SEA	XI-3	BANGKOUY::IRGC 94037-1
IRIS_313-12224	5224346	29635224	0.1763	Lao People's Democratic Republic	T	SEA	XI-3	NOON SOUNG::IRGC 91956-1
IRIS_313-10423	5221785	29635224	0.1762	Myanmar	inc	SEA	XI-adm	YN 1353-3::IRGC 117363-1
IRIS_313-10900	5222158	29635224	0.1762	Cambodia	T	SEA	XI-3	DAMNOEUB POR HING::IRGC 22841-2
CX85	5215152	29635224	0.176	Viet Nam	P	SEA	XI-adm	C 71
IRIS_313-11530	5215996	29635224	0.176	Thailand	T	SEA	XI-3	JAO KHAO::IRGC 57046-1
IRIS_313-11841	5215795	29635224	0.176	Thailand	T	SEA	XI-3	NIAW NARAI::IRGC 71353-1
IRIS_313-12292	5217208	29635224	0.176	Myanmar	T	SEA	XI-3	EMAHTAKYAN::IRGC 97789-1
IRIS_313-11925	5206948	29635224	0.1757	Thailand	inc	SEA	XI-3	SAWK GAM MAH::IRGC 75159-1
IRIS_313-9288	5204898	29635224	0.1756	Thailand	T	SEA	XI-3	TONG MAH::IRGC 65577-1
B007	5190759	29635224	0.1752	Viet Nam	inc	SEA	XI-adm	Tianhandao
IRIS_313-11936	5186079	29635224	0.175	Cambodia	T	SEA	XI-3	NEANG MINH TONN::IRGC 75366-2
IRIS_313-9286	5179650	29635224	0.1748	Thailand	inc	SEA	XI-3	LEUANG TAWNG SOOK::IRGC 24394-1
IRIS_313-11081	5178671	29635224	0.1747	Lao People's Democratic Republic	T	SEA	XI-3	THAO LOUANG::IRGC 29688-2
IRIS_313-11388	5175197	29635224	0.1746	Thailand	T	SEA	XI-3	GLAM::IRGC 47978-2
IRIS_313-11390	5169565	29635224	0.1744	Thailand	T	SEA	XI-3	NAH MOI::IRGC 48353-2
IRIS_313-12049	5162540	29635224	0.1742	Lao People's Democratic Republic	T	SEA	XI-3	MAE HANG::IRGC 81615-2
IRIS_313-9019	5156384	29635224	0.174	Thailand	T	SEA	XI-3	KAM PAI::IRGC 78245-1
IRIS_313-10520	5150468	29635224	0.1738	Myanmar	P	SEA	XI-adm	NATURAL HYBRID C 33-8::IRGC 5929-1
IRIS_313-10915	5146811	29635224	0.1737	Cambodia	T	SEA	XI-3	PHCAR SLA KI::IRGC 23169-2
IRIS_313-8638	5139852	29635224	0.1734	Lao People's Democratic Republic	inc	SEA	XI-3	Na souan::IRGC 11889-1
IRIS_313-12130	5136074	29635224	0.1733	Lao People's Democratic Republic	inc	SEA	XI-3	KHAO PA::IRGC 85972-1
IRIS_313-10683	5133227	29635224	0.1732	Lao People's Democratic Republic	T	SEA	XI-3	NGAN TIA::IRGC 13010-1
IRIS_313-11836	5132642	29635224	0.1732	Thailand	T	SEA	XI-3	KHAO KO RAOH::IRGC 71208-1
IRIS_313-11899	5131617	29635224	0.1732	Thailand	inc	SEA	XI-adm	MAHA CHAI::IRGC 73517-1
IRIS_313-8697	5122083	29635224	0.1728	Myanmar	P	SEA	XI-3	YEBAWYIN::IRGC 33885-1
IRIS_313-10751	5114604	29635224	0.1726	Viet Nam	T	SEA	XI-adm	LUA CHUM::IRGC 16840-1
IRIS_313-11383	5111922	29635224	0.1725	Viet Nam	T	SEA	XI-adm	CHIEM NGAN::IRGC 47488-1
IRIS_313-12187	5112461	29635224	0.1725	Lao People's Democratic Republic	inc	SEA	XI-adm	CHAM LEK::IRGC 89387-1
IRIS_313-12251	5099685	29635224	0.1721	Cambodia	inc	SEA	XI-3	RUS RUSSEI::IRGC 94341-1
IRIS_313-10659	5091470	29635224	0.1718	Lao People's Democratic Republic	inc	SEA	XI-3	LONG MA::IRGC 11867-1
IRIS_313-12147	5092581	29635224	0.1718	Cambodia	T	SEA	XI-3	ARNG'-KAR PHAR ONG::IRGC 87196-1
IRIS_313-9451	5087369	29635224	0.1717	Thailand	T	SEA	XI-adm	PAMAH S 18::IRGC 61322-1
IRIS_313-11194	5089419	29635224	0.1717	Thailand	inc	SEA	XI-3	KHAO PAH 8-5-38::IRGC 36587-3
IRIS_313-12109	5081134	29635224	0.1715	Cambodia	T	SEA	XI-3	ARITH::IRGC 84347-2
IRIS_313-12297	5081653	29635224	0.1715	Lao People's Democratic Republic	inc	SEA	XI-adm	LOUK PASOM::IRGC 98136-1
IRIS_313-8702	5080258	29635224	0.1714	Thailand	T	SEA	XI-3	KHAO PRAHJIN::IRGC 64420-1
IRIS_313-11515	5077902	29635224	0.1713	Thailand	I	SEA	XI-adm	BKN BR 1031-78-5-4::IRGC 55927-1
IRIS_313-9357	5069037	29635224	0.171	Thailand	inc	SEA	XI-3	HAM 48::IRGC 29740-1
IRIS_313-9697	5063193	29635224	0.1709	Thailand	T	SEA	XI-3	BOW SU SO::IRGC 78237-1
IRIS_313-11391	5061123	29635224	0.1708	Thailand	T	SEA	XI-3	NIAW DAM::IRGC 48387-2
IRIS_313-12038	5060818	29635224	0.1708	Cambodia	T	SEA	XI-3	MUOY KUM::IRGC 81314-1
IRIS_313-9669	5052484	29635224	0.1705	Thailand	T	SEA	XI-3	KAMPAI PEUN MEUANG::IRGC 78248-1
IRIS_313-12072	5053092	29635224	0.1705	Myanmar	inc	SEA	XI-adm	KYAUK KYI::IRGC 82773-3
IRIS_313-12290	5053329	29635224	0.1705	Myanmar	T	SEA	XI-adm	JON JAN::IRGC 97633-1
IRIS_313-12296	5048646	29635224	0.1704	Myanmar	T	SEA	XI-3	SABALINE::IRGC 98059-1
IRIS_313-10147	5042065	29635224	0.1701	Thailand	I	SEA	XI-3	RD 19::IRGC 39174-1
IRIS_313-12334	5041559	29635224	0.1701	Lao People's Democratic Republic	T	SEA	XI-3	DO KHAW::IRGC 106977-1
IRIS_313-10970	5036565	29635224	0.17	Viet Nam	T	SEA	XI-3	NANG SAU DO::IRGC 26243-1
CX79	5036349	29635224	0.1699	Viet Nam	P	SEA	XI-1B	Cs 94
IRIS_313-12260	5035274	29635224	0.1699	Lao People's Democratic Republic	T	SEA	XI-3	EA KHAW NGAN::IRGC 95176-2
IRIS_313-10518	5019730	29635224	0.1694	Myanmar	inc	SEA	XI-adm	KHAYANGYA D 34-181::IRGC 5861-2
IRIS_313-10681	5020179	29635224	0.1694	Lao People's Democratic Republic	T	SEA	XI-3	KHAN THAI DO::IRGC 12990-1
IRIS_313-10755	5020947	29635224	0.1694	Viet Nam	T	SEA	XI-3	NEP BA BONG TO::IRGC 17005-2
IRIS_313-10547	5016993	29635224	0.1693	Myanmar	P	SEA	XI-adm	C 34-13::IRGC 6797-2
IRIS_313-12036	5018040	29635224	0.1693	Cambodia	T	SEA	XI-3	CHAN LEUY::IRGC 81223-1
IRIS_313-12231	5017605	29635224	0.1693	Lao People's Democratic Republic	T	SEA	XI-3	TOUN::IRGC 92291-2
IRIS_313-12263	5018554	29635224	0.1693	Lao People's Democratic Republic	T	SEA	XI-3	KHIE TOM::IRGC 95601-1
IRIS_313-11833	5011336	29635224	0.1691	Thailand	T	SEA	XI-3	BOO MAE::IRGC 71058-1
IRIS_313-12133	5010321	29635224	0.1691	Lao People's Democratic Republic	T	SEA	XI-3	TAP KHOUAY::IRGC 86373-1
IRIS_313-10655	5007307	29635224	0.169	Lao People's Democratic Republic	inc	SEA	XI-adm	EA HOUM::IRGC 11783-1
IRIS_313-12028	5008669	29635224	0.169	Lao People's Democratic Republic	T	SEA	XI-adm	CHAO BONG::IRGC 80266-2
IRIS_313-11132	5005307	29635224	0.1689	Myanmar	P	SEA	XI-adm	KALALAN::IRGC 33154-2
B006	4995618	29635224	0.1686	Viet Nam	inc	SEA	XI-adm	Yikong
IRIS_313-11895	4996835	29635224	0.1686	Viet Nam	T	SEA	XI-3	BA TUC RAN::IRGC 73239-1
IRIS_313-12142	4996693	29635224	0.1686	Cambodia	T	SEA	XI-3	ATT CHHMOUS::IRGC 87030-1
IRIS_313-11998	4990703	29635224	0.1684	Cambodia	T	SEA	XI-3	DAMNOEUB KAUN KHMOM::IRGC 79159-1
IRIS_313-10654	4986938	29635224	0.1683	Lao People's Democratic Republic	P	SEA	XI-3	KA SAEN::IRGC 11642-1
CX82	4985027	29635224	0.1682	Viet Nam	P	SEA	XI-1B	X 21
IRIS_313-9062	4985306	29635224	0.1682	Thailand	T	SEA	XI-3	MAE MAI LUD NI::IRGC 66065-1
IRIS_313-12261	4986026	29635224	0.1682	Lao People's Democratic Republic	T	SEA	XI-3	EA TOM::IRGC 95276-1
IRIS_313-12302	4980340	29635224	0.1681	Lao People's Democratic Republic	inc	SEA	XI-3	LG 4153::IRGC 98528-1
IRIS_313-12151	4977625	29635224	0.168	Cambodia	T	SEA	XI-3	DAMNOEUB KRACHAK SESS::IRGC 87380-1
IRIS_313-10912	4972505	29635224	0.1678	Cambodia	T	SEA	XI-3	NEANG SAATH K 45::IRGC 23109-2
IRIS_313-12037	4970282	29635224	0.1677	Cambodia	T	SEA	XI-3	KHMAO KDET::IRGC 81278-1
IRIS_313-12291	4969907	29635224	0.1677	Myanmar	T	SEA	XI-adm	NGA CHEKH FAT::IRGC 97701-2
IRIS_313-9429	4967250	29635224	0.1676	Viet Nam	inc	SEA	XI-adm	RTS 16::IRGC 8235-1
IRIS_313-12225	4956676	29635224	0.1673	Lao People's Democratic Republic	T	SEA	XI-3	PA LAT NGAN::IRGC 91983-1
IRIS_313-12287	4951159	29635224	0.1671	Myanmar	T	SEA	XI-3	KAUK HNYINGWA::IRGC 97487-1
IRIS_313-12220	4949703	29635224	0.167	Lao People's Democratic Republic	T	SEA	XI-adm	CHAO KHIE KHOUAY::IRGC 90968-1
IRIS_313-11840	4945256	29635224	0.1669	Thailand	T	SEA	XI-3	NIAW NAHK KRAD::IRGC 71352-1
IRIS_313-8985	4942866	29635224	0.1668	Thailand	T	SEA	XI-3	KHAO' HAWM::IRGC 78257-1
IRIS_313-12249	4942609	29635224	0.1668	Cambodia	inc	SEA	XI-3	DAMNOUEB PHDAU PEN::IRGC 94176-1
IRIS_313-11921	4940609	29635224	0.1667	Thailand	inc	SEA	XI-3	KHAO GAHB BUA::IRGC 74937-1
IRIS_313-11129	4933031	29635224	0.1665	Myanmar	inc	SEA	XI-adm	HAORU::IRGC 33090-2
B024	4921197	29635224	0.1661	Thailand	inc	SEA	XI-1A	Xianluosichi
IRIS_313-12303	4918729	29635224	0.166	Lao People's Democratic Republic	T	SEA	XI-adm	LG 9274::IRGC 98715-1
IRIS_313-11958	4909027	29635224	0.1656	Thailand	T	SEA	XI-3	PUANG MAHLAI KHAO::IRGC 76959-1
IRIS_313-9121	4897835	29635224	0.1653	Thailand	T	SEA	XI-2	KHAO LEUANG RAI::IRGC 48168-1
IRIS_313-11688	4896728	29635224	0.1652	Thailand	T	SEA	XI-3	SIA MOO::IRGC 64629-1
IRIS_313-9406	4891407	29635224	0.1651	Thailand	T	SEA	XI-3	LEUANG SAWED::IRGC 78268-1
IRIS_313-12221	4891372	29635224	0.1651	Lao People's Democratic Republic	inc	SEA	XI-3	EA LOUY::IRGC 91220-1
IRIS_313-12128	4868848	29635224	0.1643	Lao People's Democratic Republic	T	SEA	XI-3	HMA GNENG::IRGC 85751-1
IRIS_313-12259	4868425	29635224	0.1643	Lao People's Democratic Republic	inc	SEA	XI-3	EA NOUAN::IRGC 95147-1
IRIS_313-10651	4865373	29635224	0.1642	Lao People's Democratic Republic	T	SEA	XI-adm	PHOU SAO LEUM NYANG::IRGC 11570-2
IRIS_313-11682	4858334	29635224	0.1639	Thailand	T	SEA	XI-3	MA EUE::IRGC 64502-1
IRIS_313-12305	4858239	29635224	0.1639	Lao People's Democratic Republic	T	SEA	XI-3	PA KHENG KHAW::IRGC 98779-1
B009	4850407	29635224	0.1637	Viet Nam	inc	SEA	XI-1A	Vietnam Zaodao
IRIS_313-11386	4851387	29635224	0.1637	Thailand	T	SEA	XI-3	KHAO DAWK MALI TIA::IRGC 47773-2
CX158	4841977	29635224	0.1634	Myanmar	T	SEA	XI-3	Shwe War Tun
IRIS_313-11680	4816715	29635224	0.1625	Thailand	T	SEA	XI-3	KHAO BUN MI::IRGC 64366-2
IRIS_313-11521	4809956	29635224	0.1623	Viet Nam	T	SEA	XI-adm	TAN NONG::IRGC 56126-1
IRIS_313-12300	4787623	29635224	0.1616	Lao People's Democratic Republic	T	SEA	XI-adm	NGAM KON DAM::IRGC 98486-1
IRIS_313-12131	4786649	29635224	0.1615	Lao People's Democratic Republic	inc	SEA	XI-3	LG 944::IRGC 86000-1
IRIS_313-11842	4777731	29635224	0.1612	Thailand	T	SEA	XI-3	NIAW YUANG KHANUN::IRGC 71362-1
IRIS_313-9131	4768836	29635224	0.1609	Viet Nam	inc	SEA	XI-3	DOC PHUNG D 12::IRGC 10234-2
IRIS_313-9116	4753397	29635224	0.1604	Thailand	inc	SEA	XI-3	LEUANG YAI 2 B 72::IRGC 882-1
IRIS_313-8466	4746880	29635224	0.1602	Thailand	T	SEA	XI-3	CHAW GAM PRUED::IRGC 71103-1
IRIS_313-10524	4736143	29635224	0.1598	Thailand	inc	SEA	XI-3	KHAO BAI SRI::IRGC 6110-2
IRIS_313-10652	4719697	29635224	0.1593	Lao People's Democratic Republic	T	SEA	XI-3	CHAO PEUAK DENG::IRGC 11602-1
IRIS_313-12101	4717745	29635224	0.1592	Cambodia	T	SEA	XI-3	SAMRONG 2::IRGC 83951-1
IRIS_313-11961	4707686	29635224	0.1589	Thailand	inc	SEA	XI-3	IN TOK::IRGC 77071-1
IRIS_313-11920	4705883	29635224	0.1588	Thailand	inc	SEA	XI-adm	GI TAH::IRGC 74883-1
IRIS_313-11962	4707294	29635224	0.1588	Thailand	inc	SEA	XI-3	KHAO SETTI::IRGC 77084-1
IRIS_313-12190	4703665	29635224	0.1587	Lao People's Democratic Republic	T	SEA	XI-adm	CHAO KHAW NYAO::IRGC 89460-1
IRIS_313-12097	4700085	29635224	0.1586	Cambodia	T	SEA	XI-3	NEANG MINH::IRGC 83897-3
IRIS_313-11676	4689816	29635224	0.1583	Thailand	T	SEA	XI-3	E MOOM::IRGC 64291-1
IRIS_313-11679	4686938	29635224	0.1582	Thailand	T	SEA	XI-3	GASET BOW::IRGC 64316-1
IRIS_313-10650	4686711	29635224	0.1581	Thailand	T	SEA	XI-3	NAHNG PRAYAH 132::IRGC 11470-1
IRIS_313-9114	4675088	29635224	0.1578	Thailand	P	SEA	XI-adm	LEUANG 28-1-87::IRGC 874-1
IRIS_313-11547	4661669	29635224	0.1573	Myanmar	inc	SEA	XI-adm	SHWE SABA::IRGC 58206-1
IRIS_313-8341	4653192	29635224	0.157	Viet Nam	inc	SEA	XI-adm	BAT DO::IRGC 7014-1
IRIS_313-11678	4649998	29635224	0.1569	Thailand	T	SEA	XI-3	E PLUAK::IRGC 64297-1
IRIS_313-11957	4641855	29635224	0.1566	Thailand	T	SEA	XI-adm	DAW LUEY 4-3::IRGC 76929-1
IRIS_313-12146	4628565	29635224	0.1562	Cambodia	T	SEA	XI-adm	AM BEUS::IRGC 87189-1
IRIS_313-10682	4625594	29635224	0.1561	Lao People's Democratic Republic	T	SEA	XI-3	PA KHENG::IRGC 12996-1
IRIS_313-10748	4613605	29635224	0.1557	Viet Nam	T	SEA	XI-adm	LUA DUC::IRGC 16718-1
IRIS_313-12355	4606937	29635224	0.1555	Lao People's Democratic Republic	T	SEA	XI-adm	NASAENG::IRGC 107819-1
IRIS_313-12041	4592025	29635224	0.155	Cambodia	T	SEA	XI-3	NOU::IRGC 81352-1
IRIS_313-9637	4589359	29635224	0.1549	Viet Nam	T	SEA	XI-3	BONG BOI::IRGC 32094-1
IRIS_313-8659	4588102	29635224	0.1548	Myanmar	inc	SEA	XI-adm	YA THAY SAN::IRGC 58245-1
CX107	4583580	29635224	0.1547	Viet Nam	I	SEA	XI-3	Tun Sart
IRIS_313-9182	4569839	29635224	0.1542	Myanmar	inc	SEA	XI-adm	KHAO MON::IRGC 60764-1
IRIS_313-9198	4568815	29635224	0.1542	Lao People's Democratic Republic	inc	SEA	XI-3	KHAO PONG AEV::IRGC 29820-1
IRIS_313-11999	4562041	29635224	0.1539	Cambodia	T	SEA	XI-3	KAUN TREI::IRGC 79194-1
IRIS_313-12040	4554979	29635224	0.1537	Cambodia	T	SEA	XI-3	NEANG LAU::IRGC 81328-1
IRIS_313-11927	4545665	29635224	0.1534	Thailand	inc	SEA	XI-3	YAH TOW::IRGC 75191-1
IRIS_313-11935	4534426	29635224	0.153	Cambodia	T	SEA	XI-3	KONG KHSACH BANG KATT::IRGC 75350-1
IRIS_313-12127	4530794	29635224	0.1529	Lao People's Democratic Republic	T	SEA	XI-3	INPONG::IRGC 85524-1
IRIS_313-12268	4527892	29635224	0.1528	Myanmar	T	SEA	XI-adm	MAYATAUNG::IRGC 95957-1
IRIS_313-12121	4519946	29635224	0.1525	Lao People's Democratic Republic	T	SEA	XI-3	CHA LIENG::IRGC 84920-1
IRIS_313-11706	4493010	29635224	0.1516	Thailand	T	SEA	XI-3	KHAO' NOK 4::IRGC 65932-1
IRIS_313-10134	4486764	29635224	0.1514	Thailand	inc	SEA	XI-3	PIN GAEW 56::IRGC 7887-1
IRIS_313-12345	4475664	29635224	0.151	Lao People's Democratic Republic	T	SEA	GJ-sbtrp	VIENG::IRGC 107375-2
IRIS_313-8586	4472800	29635224	0.1509	Thailand	T	SEA	XI-3	PLI KHAO::IRGC 64596-1
IRIS_313-8751	4468365	29635224	0.1508	Myanmar	inc	SEA	XI-3	HNANWA::IRGC 33118-1
IRIS_313-12044	4390007	29635224	0.1481	Cambodia	T	SEA	XI-3	SAR SIEM::IRGC 81386-2
IRIS_313-11151	4381074	29635224	0.1478	Myanmar	I	SEA	XI-3	E 21::IRGC 33929-2
IRIS_313-9112	4374118	29635224	0.1476	Thailand	inc	SEA	XI-3	LEUANG YAI 344::IRGC 651-1
IRIS_313-11816	4349333	29635224	0.1468	Myanmar	T	SEA	XI-adm	KARILETYONE::IRGC 70745-1
IRIS_313-12000	4341453	29635224	0.1465	Cambodia	T	SEA	XI-3	LAANG::IRGC 79258-1
IRIS_313-9602	4317031	29635224	0.1457	Thailand	inc	SEA	XI-adm	HTA 22::IRGC 45827-1
IRIS_313-11079	4314069	29635224	0.1456	Lao People's Democratic Republic	T	SEA	XI-3	PHAN PHAE::IRGC 29652-2
IRIS_313-11835	4282871	29635224	0.1445	Thailand	T	SEA	XI-adm	E NOI NAH::IRGC 71138-1
IRIS_313-9600	4246020	29635224	0.1433	Thailand	T	SEA	XI-adm	E LONG MAH::IRGC 47946-1
IRIS_313-9020	4239484	29635224	0.1431	Thailand	T	SEA	XI-3	LEUANG CHAIYAPHUM::IRGC 78266-1
IRIS_313-11720	4239746	29635224	0.1431	Thailand	inc	SEA	XI-3	DAW 85::IRGC 66704-1
IRIS_313-11118	4226131	29635224	0.1426	Viet Nam	T	SEA	XI-3	SOC NAU (BIEN THE)::IRGC 32074-3
CX154	4221834	29635224	0.1425	Thailand	T	SEA	XI-3	Khao Dawk Mali 105
IRIS_313-11845	4219610	29635224	0.1424	Thailand	T	SEA	GJ-sbtrp	SING SAI::IRGC 71442-2
IRIS_313-11085	4215783	29635224	0.1423	Lao People's Democratic Republic	inc	SEA	XI-adm	KHAO HAE::IRGC 29773-3
IRIS_313-11089	4207921	29635224	0.142	Cambodia	inc	SEA	XI-3	SRAU THMOR::IRGC 29904-1
IRIS_313-11677	4208794	29635224	0.142	Thailand	T	SEA	XI-3	E NAWN KHAO::IRGC 64293-1
IRIS_313-12311	4205310	29635224	0.1419	Lao People's Democratic Republic	T	SEA	GJ-sbtrp	TAM::IRGC 99161-1
IRIS_313-11820	4172682	29635224	0.1408	Myanmar	T	SEA	XI-3	PAKISTANHMWE::IRGC 70763-1
IRIS_313-11704	4141705	29635224	0.1398	Thailand	T	SEA	XI-3	BAHN DAENG::IRGC 65771-1
IRIS_313-11684	4131540	29635224	0.1394	Thailand	T	SEA	XI-3	OB CHUEY::IRGC 64568-1
IRIS_313-11721	4114087	29635224	0.1388	Thailand	inc	SEA	XI-3	GAEW DAENG::IRGC 66707-1
IRIS_313-11083	4111216	29635224	0.1387	Lao People's Democratic Republic	T	SEA	XI-3	EA TIA::IRGC 29713-2
IRIS_313-11687	4064882	29635224	0.1372	Thailand	T	SEA	XI-3	SA GAE::IRGC 64613-1
IRIS_313-12058	4061938	29635224	0.1371	Cambodia	T	SEA	XI-3	KUL REUSEI::IRGC 82308-1
IRIS_313-11674	4055878	29635224	0.1369	Thailand	T	SEA	XI-3	BEUA KAE::IRGC 64221-1
IRIS_313-11719	4056848	29635224	0.1369	Thailand	inc	SEA	XI-3	DAWK PUT::IRGC 66699-1
IRIS_313-11819	4027132	29635224	0.1359	Myanmar	T	SEA	XI-3	PADINTHUMA::IRGC 70762-2
IRIS_313-11707	4020986	29635224	0.1357	Thailand	T	SEA	XI-3	KHAO SAHKORN::IRGC 65948-1
IRIS_313-11093	4003043	29635224	0.1351	Lao People's Democratic Republic	T	SEA	GJ-sbtrp	KHAO TAM::IRGC 30085-2
IRIS_313-11708	3998560	29635224	0.1349	Thailand	T	SEA	XI-3	KHAO YAI GUANG::IRGC 65972-1
IRIS_313-11685	3932105	29635224	0.1327	Thailand	T	SEA	XI-3	PLAWNG SAENG::IRGC 64595-1
IRIS_313-11635	3918239	29635224	0.1322	Thailand	T	SEA	XI-3	GAM PERNG::IRGC 62135-1
IRIS_313-11700	3897437	29635224	0.1315	Thailand	T	SEA	XI-3	DAW NOK KAEN::IRGC 65548-1
CX32	3887923	29635224	0.1312	Myanmar	P	SEA	GJ-adm	Manauthukha
IRIS_313-11709	3885388	29635224	0.1311	Thailand	T	SEA	XI-3	LEUANG KHAJAWN::IRGC 66014-1
IRIS_313-11681	3883005	29635224	0.131	Thailand	T	SEA	XI-3	KHAO' PAWM::IRGC 64416-2
IRIS_313-11711	3877234	29635224	0.1308	Thailand	T	SEA	XI-3	RAI MAHK MEUANG::IRGC 66154-1
IRIS_313-11683	3865015	29635224	0.1304	Thailand	T	SEA	XI-3	NIAW KHIAW NGOO::IRGC 64563-1
IRIS_313-11686	3842601	29635224	0.1297	Thailand	T	SEA	XI-3	QUAHNG LUANG::IRGC 64609-2
IRIS_313-11705	3795106	29635224	0.1281	Thailand	T	SEA	XI-3	DAWK PUD KHAO::IRGC 65808-1
IRIS_313-11127	3793901	29635224	0.128	Myanmar	inc	SEA	GJ-sbtrp	BUBAW::IRGC 32989-2
IRIS_313-11248	3787875	29635224	0.1278	Thailand	T	SEA	GJ-trp	NIAW KHAMIN::IRGC 40222-1
IRIS_313-12074	3788322	29635224	0.1278	Myanmar	T	SEA	cB (Bas)	KYAIN WAR ME DONE::IRGC 82819-1
IRIS_313-11710	3763049	29635224	0.127	Thailand	T	SEA	XI-3	LEUANG MAI::IRGC 66019-2
IRIS_313-11092	3709115	29635224	0.1252	Lao People's Democratic Republic	T	SEA	admix	KHAO PA SIEV::IRGC 30063-1
IRIS_313-10660	3622800	29635224	0.1222	Lao People's Democratic Republic	inc	SEA	GJ-sbtrp	LEP HED::IRGC 11917-1
IRIS_313-12347	3598293	29635224	0.1214	Lao People's Democratic Republic	T	SEA	GJ-sbtrp	LAI DAM::IRGC 107490-1
IRIS_313-11195	3578548	29635224	0.1208	Myanmar	T	SEA	GJ-sbtrp	KHAW KAR 13::IRGC 36711-1
IRIS_313-11073	3540094	29635224	0.1195	Lao People's Democratic Republic	T	SEA	GJ-sbtrp	KHAO DAM::IRGC 29481-3
IRIS_313-8872	3513207	29635224	0.1185	Thailand	T	SEA	GJ-sbtrp	571::IRGC 48493-1
IRIS_313-11817	3511519	29635224	0.1185	Myanmar	T	SEA	XI-adm	KHAOSAING::IRGC 70746-2
IRIS_313-11846	3511921	29635224	0.1185	Thailand	T	SEA	GJ-sbtrp	TON TIA GUAY NU::IRGC 71467-1
IRIS_313-11075	3507491	29635224	0.1184	Lao People's Democratic Republic	T	SEA	GJ-adm	KHAO NAM YEN::IRGC 29546-2
IRIS_313-12257	3480158	29635224	0.1174	Lao People's Democratic Republic	inc	SEA	GJ-sbtrp	DENG PEE::IRGC 94991-1
IRIS_313-11611	3459135	29635224	0.1167	Thailand	T	SEA	GJ-trp	YAH YAW::IRGC 61359-1
IRIS_313-11077	3442746	29635224	0.1162	Lao People's Democratic Republic	T	SEA	GJ-sbtrp	LAI HANG HMA::IRGC 29608-2
IRIS_313-12200	3438362	29635224	0.116	Lao People's Democratic Republic	inc	SEA	GJ-sbtrp	LEUANG::IRGC 90000-1
IRIS_313-8578	3433453	29635224	0.1159	Viet Nam	T	SEA	GJ-sbtrp	KHAU TRA BONG::IRGC 78342-1
IRIS_313-12344	3425492	29635224	0.1156	Lao People's Democratic Republic	T	SEA	GJ-sbtrp	KHAO::IRGC 107359-1
IRIS_313-12324	3410950	29635224	0.1151	Lao People's Democratic Republic	inc	SEA	GJ-sbtrp	BER YA::IRGC 99970-1
IRIS_313-12332	3403342	29635224	0.1148	Lao People's Democratic Republic	inc	SEA	GJ-sbtrp	DENG NYAY::IRGC 106907-1
IRIS_313-12266	3383659	29635224	0.1142	Myanmar	T	SEA	GJ-sbtrp	KAUK PAHLING::IRGC 95823-2
IRIS_313-12252	3370012	29635224	0.1137	Lao People's Democratic Republic	inc	SEA	GJ-sbtrp	A MOUK::IRGC 94474-1
IRIS_313-9123	3355224	29635224	0.1132	Thailand	T	SEA	GJ-sbtrp	LEUANG GLIANG::IRGC 71271-1
IRIS_313-12330	3346908	29635224	0.1129	Lao People's Democratic Republic	T	SEA	GJ-sbtrp	CHAO PEE::IRGC 106767-1
IRIS_313-11834	3329482	29635224	0.1123	Thailand	T	SEA	GJ-sbtrp	BUENG MONG LENG WE::IRGC 71088-1
IRIS_313-10336	3305561	29635224	0.1115	Lao People's Democratic Republic	I	SEA	GJ-trp	B 6144-MR-6-0-0::IRGC 117371-1
IRIS_313-11831	3302654	29635224	0.1114	Thailand	T	SEA	GJ-sbtrp	KHAO' DAENG HAWM::IRGC 71001-1
IRIS_313-8884	3293862	29635224	0.1111	Thailand	T	SEA	GJ-sbtrp	E WAWNG::IRGC 71140-1
IRIS_313-12265	3279867	29635224	0.1107	Lao People's Democratic Republic	inc	SEA	GJ-sbtrp	KON SIM::IRGC 95626-1
IRIS_313-7856	3278891	29635224	0.1106	Thailand	inc	SEA	GJ-sbtrp	CHA LOY OE::C1
IRIS_313-12340	3274392	29635224	0.1105	Lao People's Democratic Republic	T	SEA	GJ-sbtrp	NYAO::IRGC 107091-1
IRIS_313-11923	3265284	29635224	0.1102	Thailand	inc	SEA	GJ-sbtrp	KHAO' NGAW::IRGC 74985-1
IRIS_313-10922	3232944	29635224	0.1091	Lao People's Democratic Republic	inc	SEA	GJ-sbtrp	R 258::IRGC 23702-2
IRIS_313-11926	3232837	29635224	0.1091	Thailand	inc	SEA	GJ-sbtrp	SI NAM PUENG::IRGC 75165-1
IRIS_313-12299	3226327	29635224	0.1089	Lao People's Democratic Republic	T	SEA	GJ-sbtrp	MUANG TAY::IRGC 98382-1
IRIS_313-8580	3174590	29635224	0.1071	Thailand	T	SEA	GJ-sbtrp	DAM::IRGC 23710-1
IRIS_313-12029	3165839	29635224	0.1068	Lao People's Democratic Republic	T	SEA	GJ-sbtrp	CHAO MEO::IRGC 80273-1
IRIS_313-12352	3159486	29635224	0.1066	Lao People's Democratic Republic	T	SEA	GJ-sbtrp	MEE::IRGC 107773-1
IRIS_313-11892	3146188	29635224	0.1062	Thailand	inc	SEA	GJ-sbtrp	HO MOK::IRGC 73171-3
IRIS_313-12342	3126926	29635224	0.1055	Lao People's Democratic Republic	T	SEA	GJ-sbtrp	HAI NA::IRGC 107117-1
IRIS_313-12336	3121289	29635224	0.1053	Lao People's Democratic Republic	T	SEA	GJ-sbtrp	DO LEUANG::IRGC 106990-1
IRIS_313-11832	3117316	29635224	0.1052	Thailand	T	SEA	GJ-sbtrp	AE WAWNG POO DOO::IRGC 71007-1
IRIS_313-12322	3117491	29635224	0.1052	Lao People's Democratic Republic	T	SEA	GJ-sbtrp	VOK::IRGC 99831-1
IRIS_313-10923	3115553	29635224	0.1051	Thailand	T	SEA	GJ-sbtrp	CHABLI CHABOL GLANG::IRGC 23706-1
IRIS_313-12337	3104142	29635224	0.1047	Lao People's Democratic Republic	T	SEA	GJ-sbtrp	DOK HIEN NOI::IRGC 107021-1
IRIS_313-12341	3092979	29635224	0.1044	Lao People's Democratic Republic	inc	SEA	GJ-sbtrp	NYON::IRGC 107099-1
IRIS_313-10653	3091031	29635224	0.1043	Lao People's Democratic Republic	inc	SEA	GJ-sbtrp	MAK KHEUA::IRGC 11628-1
IRIS_313-10679	3086976	29635224	0.1042	Lao People's Democratic Republic	T	SEA	GJ-sbtrp	KHAI DO::IRGC 12903-2
IRIS_313-12312	3076578	29635224	0.1038	Lao People's Democratic Republic	inc	SEA	GJ-sbtrp	TA SENG::IRGC 99176-1
IRIS_313-12289	3073087	29635224	0.1037	Myanmar	T	SEA	GJ-sbtrp	YARSABA::IRGC 97567-1
IRIS_313-12254	3050142	29635224	0.1029	Lao People's Democratic Republic	inc	SEA	GJ-sbtrp	BAN BONG::IRGC 94565-1
IRIS_313-10176	3042328	29635224	0.1027	Thailand	T	SEA	GJ-sbtrp	NAM ROO::IRGC 66996-1
IRIS_313-9249	3029369	29635224	0.1022	Cambodia	inc	SEA	GJ-tmp	KANU DAM::IRGC 29755-1
IRIS_313-8911	3013893	29635224	0.1017	Thailand	T	SEA	admix	LEK::IRGC 40199-1
IRIS_313-12348	3005911	29635224	0.1014	Lao People's Democratic Republic	T	SEA	GJ-sbtrp	LOUK NOK::IRGC 107599-1
IRIS_313-8735	2995866	29635224	0.1011	Viet Nam	T	SEA	GJ-adm	NEP NGAU::IRGC 78369-1
IRIS_313-10656	2993994	29635224	0.101	Lao People's Democratic Republic	inc	SEA	GJ-sbtrp	NOK KOD::IRGC 11784-1
IRIS_313-12227	2988216	29635224	0.1008	Lao People's Democratic Republic	T	SEA	GJ-sbtrp	SET::IRGC 92200-1
IRIS_313-12346	2953557	29635224	0.09966	Lao People's Democratic Republic	T	SEA	GJ-sbtrp	LAB::IRGC 107468-1
IRIS_313-12313	2950371	29635224	0.09956	Lao People's Democratic Republic	inc	SEA	GJ-sbtrp	LAI HIN::IRGC 99305-3
IRIS_313-12226	2948841	29635224	0.0995	Lao People's Democratic Republic	T	SEA	GJ-sbtrp	PANG::IRGC 91987-1
IRIS_313-12321	2947645	29635224	0.09946	Lao People's Democratic Republic	T	SEA	GJ-sbtrp	LG 10344::IRGC 99789-1
CX354	2936477	29635224	0.09909	Viet Nam	P	SEA	GJ-adm	CAU 2
IRIS_313-12242	2934330	29635224	0.09901	Lao People's Democratic Republic	T	SEA	GJ-sbtrp	KHAO KHOT::IRGC 93892-1
IRIS_313-11897	2910233	29635224	0.0982	Thailand	T	SEA	GJ-sbtrp	PHIT CHZK::IRGC 73317-1
IRIS_313-12164	2908440	29635224	0.09814	Cambodia	T	SEA	GJ-adm	PA YANG NOEUGN::IRGC 87778-1
IRIS_313-12077	2893939	29635224	0.09765	Lao People's Democratic Republic	inc	SEA	GJ-sbtrp	YOI::IRGC 82855-1
CX353	2888402	29635224	0.09747	Viet Nam	P	SEA	GJ-adm	CAU 1
IRIS_313-12063	2848889	29635224	0.09613	Lao People's Democratic Republic	inc	SEA	GJ-sbtrp	XIENG KANG::IRGC 82533-1
IRIS_313-8599	2838800	29635224	0.09579	Thailand	T	SEA	GJ-sbtrp	BUE GA WA::IRGC 60824-1
IRIS_313-8565	2835030	29635224	0.09566	Thailand	T	SEA	GJ-sbtrp	YAHNG LEU::IRGC 78279-1
IRIS_313-12351	2816248	29635224	0.09503	Lao People's Democratic Republic	T	SEA	GJ-sbtrp	KHAO LOUANG::IRGC 107770-3
IRIS_313-12350	2807091	29635224	0.09472	Lao People's Democratic Republic	T	SEA	GJ-sbtrp	MAK KHEUA KANG::IRGC 107712-1
IRIS_313-12134	2805080	29635224	0.09465	Lao People's Democratic Republic	T	SEA	GJ-sbtrp	THATENG::IRGC 86377-3
IRIS_313-12129	2785862	29635224	0.09401	Lao People's Democratic Republic	T	SEA	GJ-sbtrp	MON LAI::IRGC 85857-1
IRIS_313-8011	2764541	29635224	0.09329	Viet Nam	inc	SEA	GJ-sbtrp	VIETNAM 1::C1
IRIS_313-10657	2748147	29635224	0.09273	Lao People's Democratic Republic	inc	SEA	GJ-sbtrp	THANGONE::IRGC 11816-3
IRIS_313-12307	2747242	29635224	0.0927	Lao People's Democratic Republic	inc	SEA	GJ-sbtrp	POU::IRGC 98968-1
IRIS_313-12323	2744548	29635224	0.09261	Lao People's Democratic Republic	T	SEA	GJ-sbtrp	BAN KEO::IRGC 99953-1
IRIS_313-12353	2723092	29635224	0.09189	Lao People's Democratic Republic	T	SEA	GJ-sbtrp	MOK::IRGC 107804-1
IRIS_313-12076	2695254	29635224	0.09095	Lao People's Democratic Republic	inc	SEA	GJ-sbtrp	HANG::IRGC 82842-1
IRIS_313-11922	2679604	29635224	0.09042	Thailand	inc	SEA	GJ-sbtrp	KHAO' NAN::IRGC 74981-1
IRIS_313-11094	2643152	29635224	0.08919	Lao People's Democratic Republic	T	SEA	GJ-sbtrp	MAK BOUAP::IRGC 30106-3
IRIS_313-12262	2637913	29635224	0.08901	Lao People's Democratic Republic	inc	SEA	GJ-sbtrp	NYAE::IRGC 95302-1
IRIS_313-11900	2633073	29635224	0.08885	Thailand	inc	SEA	GJ-sbtrp	PLE LIA::IRGC 73562-1
IRIS_313-11095	2632281	29635224	0.08882	Lao People's Democratic Republic	T	SEA	XI-3	MAK EA NAM::IRGC 30131-2
IRIS_313-12349	2608546	29635224	0.08802	Lao People's Democratic Republic	inc	SEA	GJ-sbtrp	MAK KHEUA DENG::IRGC 107709-1
IRIS_313-12258	2552475	29635224	0.08613	Lao People's Democratic Republic	T	SEA	GJ-sbtrp	DON::IRGC 95117-1
IRIS_313-12228	2550234	29635224	0.08605	Lao People's Democratic Republic	T	SEA	GJ-sbtrp	SOM::IRGC 92221-1
IRIS_313-12071	2538603	29635224	0.08566	Lao People's Democratic Republic	inc	SEA	GJ-sbtrp	NIA::IRGC 82728-1
IRIS_313-11984	2512505	29635224	0.08478	Viet Nam	T	SEA	GJ-tmp	BLAU BLA::IRGC 78460-1
CX106	2485825	29635224	0.08388	Viet Nam	P	SEA	GJ-trp	SAL BUI BAO
IRIS_313-8690	2214396	29635224	0.07472	Viet Nam	inc	SEA	GJ-adm	NEP HOA VANG::IRGC 40748-2
IRIS_313-10916	2038676	29635224	0.06879	Cambodia	T	SEA	GJ-tmp	SRAU SLAP::IRGC 23267-2
IRIS_313-11924	1939394	29635224	0.06544	Thailand	inc	SEA	GJ-sbtrp	NAM JAM::IRGC 75069-1
B008	1777836	29635224	0.05999	Viet Nam	T	SEA	GJ-tmp	Baxiang
IRIS_313-8457	8248512	29635224	0.2783	Indonesia	T	SER	XI-3	SARA::IRGC 66631-1
IRIS_313-11177	7578964	29635224	0.2557	Indonesia	T	SER	XI-adm	DELI POCONG::IRGC 35265-1
IRIS_313-11423	7129314	29635224	0.2406	Philippines	P	SER	XI-adm	C 1016-1::IRGC 50368-1
IRIS_313-8383	6636898	29635224	0.224	Philippines	T	SER	XI-adm	GENE::IRGC 67434-1
IRIS_313-10513	6490230	29635224	0.219	Philippines	P	SER	XI-adm	LUBANG PUTI::IRGC 5429-1
IRIS_313-11011	6470428	29635224	0.2183	Indonesia	T	SER	XI-adm	SUNAR::IRGC 27470-1
IRIS_313-10694	6344703	29635224	0.2141	Malaysia	T	SER	XI-3	HAJI HARUN 38::IRGC 13827-2
IRIS_313-10581	6320318	29635224	0.2133	Philippines	T	SER	GJ-trp	P PEY SIQAT::IRGC 8129-1
IRIS_313-8723	6222399	29635224	0.21	Malaysia	T	SER	XI-3	KUTAI PAYA::IRGC 19528-1
IRIS_313-11162	6215608	29635224	0.2097	Indonesia	T	SER	XI-1B	SABRAN::IRGC 34630-1
IRIS_313-10412	6209269	29635224	0.2095	Indonesia	I	SER	XI-adm	RR 272-17-829::IRGC 117354-1
CX71	6163860	29635224	0.208	Malaysia	P	SER	XI-3	Innmayebaw
CX23	6143637	29635224	0.2073	Indonesia	T	SER	XI-3	Rasi
IRIS_313-10684	6144749	29635224	0.2073	Malaysia	T	SER	XI-3	BONGOLON::IRGC 13094-3
IRIS_313-8744	6128724	29635224	0.2068	Indonesia	T	SER	XI-3	REMOL::IRGC 18624-1
IRIS_313-10565	6041595	29635224	0.2039	Indonesia	i	SER	XI-adm	221 B 36-1-1-1-1::IRGC 7585-1
IRIS_313-8903	6036594	29635224	0.2037	Philippines	I	SER	XI-3	BPI 76 NON SENSITIVE (GREEN)::IRGC 9790-1
IRIS_313-10433	6031580	29635224	0.2035	Philippines	I	SER	XI-adm	TP MIL 53::IRGC 326-2
IRIS_313-11178	6026586	29635224	0.2034	Indonesia	T	SER	XI-3	RUJAK DANAN::IRGC 35446-2
IRIS_313-9251	6018261	29635224	0.2031	Indonesia	T	SER	XI-3	JANDA LAOR::IRGC 48552-1
IRIS_313-15902	6014936	29635224	0.203	Philippines	I	SER	XI-1B	IRRI 146::G1
IRIS_313-10947	5990053	29635224	0.2021	Indonesia	inc	SER	XI-3	NANE::IRGC 25035-1
IRIS_313-11339	5980138	29635224	0.2018	Philippines	T	SER	XI-2	MILAGROSA::IRGC 44634-2
CX70	5955984	29635224	0.201	Malaysia	P	SER	XI-adm	MR 77 (Seberang)
IRIS_313-10334	5948338	29635224	0.2007	Indonesia	I	SER	XI-1B	B 6136 E-3-TB-0-1-5::IRGC 117311-1
IRIS_313-10940	5920338	29635224	0.1998	Indonesia	T	SER	XI-3	SITANDANG::IRGC 24681-1
CX237	5917432	29635224	0.1997	Indonesia	I	SER	XI-1B	B 6136-3-TB-0-1-5
B048	5897025	29635224	0.199	Indonesia	I	SER	XI-1B	CISOKAN
IRIS_313-11006	5869434	29635224	0.1981	Indonesia	T	SER	XI-3	PULU RENNI::IRGC 27386-1
IRIS_313-10428	5864817	29635224	0.1979	Malaysia	T	SER	XI-3	SERAUP 50::IRGC 14-1
IRIS_313-11319	5837323	29635224	0.197	Indonesia	T	SER	XI-3	KENCANA RANDAH::IRGC 43709-2
IRIS_313-10935	5815063	29635224	0.1962	Indonesia	inc	SER	XI-3	BRONDOL PUTIH::IRGC 24541-1
CX68	5804818	29635224	0.1959	Malaysia	P	SER	XI-adm	MR 106
CX25	5801106	29635224	0.1958	Indonesia	P	SER	XI-1B	Cisanggarung
IRIS_313-11235	5798960	29635224	0.1957	Philippines	P	SER	XI-adm	PINILING DANIEL::IRGC 38828-2
IRIS_313-10821	5784467	29635224	0.1952	Indonesia	T	SER	XI-3	TJ PERAK::IRGC 19141-1
IRIS_313-8791	5732097	29635224	0.1934	Indonesia	T	SER	XI-3	ARANG::IRGC 43322-1
IRIS_313-10823	5721251	29635224	0.1931	Indonesia	T	SER	XI-3	UTRI DELI::IRGC 19182-1
IRIS_313-10768	5720119	29635224	0.193	Indonesia	T	SER	XI-3	GADABUNG (GUNDIL)::IRGC 17569-2
IRIS_313-8987	5686205	29635224	0.1919	Malaysia	T	SER	XI-adm	SERIBU::IRGC 71615-1
IRIS_313-10844	5664925	29635224	0.1912	Indonesia	I	SER	XI-3	INDO NO 7505::IRGC 20162-2
IRIS_313-10955	5665168	29635224	0.1912	Indonesia	T	SER	XI-3	PADI PUYUH::IRGC 25532-1
[truncated: 712 more rows]
